# Supplementary material for: Too hot for my bugs: Mediterranean heatwaves disrupt associated microbiomes in the sponge Petrosia ficiformis
Source: Research Square preprint supplement (doi:10.21203/rs.3.rs-6485806/v1), 2025-06-03
Supplement: Supplementary file 1 [file 2da44f0edf2aff05534c820f.xlsx]

## Sheet: S5
Table S5. Feature ASV table with counts abundance, metadata information, taxonomy.
ASV ID	Abundance	Sample	Heatwave	Site	Site_code	Shape	Habitat	pH	Sponge_Species	Acidification	Bleached	Description	Group	Kingdom	Phylum	Class	Order	Family	Genus	Species
92c10ef09fc363087097e1d01f862252	16238	VcPf1N	Unhealthy	Grotta_Vico	VC	White_Cave_Dweller	Cave	Ambient	P.ficiformis	No	Yes	PetrosiaVC	PF5	Bacteria	Bacteroidota	Bacteroidia	Sphingobacteriales	Lentimicrobiaceae	Lentimicrobiaceae	Genus: Lentimicrobiaceae
d5fcb0562c0b62b28c2e8cb364e4ee4d	7969	VcPf1N	Unhealthy	Grotta_Vico	VC	White_Cave_Dweller	Cave	Ambient	P.ficiformis	No	Yes	PetrosiaVC	PF5	Bacteria	Cyanobacteria	Vampirivibrionia	Gastranaerophilales	Gastranaerophilales	Gastranaerophilales	Genus: Gastranaerophilales
1542218a28090f10626ae537e94debc4	5502	VcPf1N	Unhealthy	Grotta_Vico	VC	White_Cave_Dweller	Cave	Ambient	P.ficiformis	No	Yes	PetrosiaVC	PF5	Bacteria	Firmicutes	Clostridia	Christensenellales	Christensenellaceae	Family: Christensenellaceae	Family: Christensenellaceae
bd84ba173f58aeb242728383473fb995	2556	VcPf1N	Unhealthy	Grotta_Vico	VC	White_Cave_Dweller	Cave	Ambient	P.ficiformis	No	Yes	PetrosiaVC	PF5	Bacteria	Firmicutes	Clostridia	Peptostreptococcales-Tissierellales	Caminicellaceae	Paramaledivibacter	Genus: Paramaledivibacter
36608d632cef5dae1775040abc027877	1402	VcPf1N	Unhealthy	Grotta_Vico	VC	White_Cave_Dweller	Cave	Ambient	P.ficiformis	No	Yes	PetrosiaVC	PF5	Bacteria	Bacteroidota	Bacteroidia	Sphingobacteriales	Lentimicrobiaceae	Lentimicrobiaceae	Genus: Lentimicrobiaceae
fd1dd23785a8ff130aa31f8389cccf02	1187	VcPf1N	Unhealthy	Grotta_Vico	VC	White_Cave_Dweller	Cave	Ambient	P.ficiformis	No	Yes	PetrosiaVC	PF5	Bacteria	Bacteroidota	Bacteroidia	Flavobacteriales	Flavobacteriaceae	Muricauda	Genus: Muricauda
bd2bccc370d4b7f85be97a65a21f2f43	912	VcPf1N	Unhealthy	Grotta_Vico	VC	White_Cave_Dweller	Cave	Ambient	P.ficiformis	No	Yes	PetrosiaVC	PF5	Bacteria	Planctomycetota	Planctomycetes	Pirellulales	Pirellulaceae	Pir4_lineage	Genus: Pir4_lineage
9f9c9629170cb5de6072c3932b1f657b	865	VcPf1N	Unhealthy	Grotta_Vico	VC	White_Cave_Dweller	Cave	Ambient	P.ficiformis	No	Yes	PetrosiaVC	PF5	Bacteria	Planctomycetota	Planctomycetes	Pirellulales	Pirellulaceae	Pir4_lineage	Genus: Pir4_lineage
225726c7c7861c9724f3862671b44af2	812	VcPf1N	Unhealthy	Grotta_Vico	VC	White_Cave_Dweller	Cave	Ambient	P.ficiformis	No	Yes	PetrosiaVC	PF5	Bacteria	Myxococcota	Polyangia	Polyangiales	Sandaracinaceae	Sandaracinus	Genus: Sandaracinus
a8925e3a0dff641f7b30c6ce179db493	684	VcPf1N	Unhealthy	Grotta_Vico	VC	White_Cave_Dweller	Cave	Ambient	P.ficiformis	No	Yes	PetrosiaVC	PF5	Bacteria	Cyanobacteria	Vampirivibrionia	Gastranaerophilales	Gastranaerophilales	Gastranaerophilales	Genus: Gastranaerophilales
e23836c6e2c0ec6a878c22043635fad1	618	VcPf1N	Unhealthy	Grotta_Vico	VC	White_Cave_Dweller	Cave	Ambient	P.ficiformis	No	Yes	PetrosiaVC	PF5	Bacteria	Bacteroidota	Bacteroidia	Bacteroidales	Prolixibacteraceae	Family: Prolixibacteraceae	Family: Prolixibacteraceae
b1b8d9297c43420137d6425156bc5c0a	547	VcPf1N	Unhealthy	Grotta_Vico	VC	White_Cave_Dweller	Cave	Ambient	P.ficiformis	No	Yes	PetrosiaVC	PF5	Bacteria	Firmicutes	Clostridia	Lachnospirales	Lachnospiraceae	Vallitalea	Genus: Vallitalea
aedd383bce81eff5351b2f4b767b427c	491	VcPf1N	Unhealthy	Grotta_Vico	VC	White_Cave_Dweller	Cave	Ambient	P.ficiformis	No	Yes	PetrosiaVC	PF5	Bacteria	Bacteroidota	Bacteroidia	Chitinophagales	Saprospiraceae	Family: Saprospiraceae	Family: Saprospiraceae
df30c688315fea352755e049ba49b037	485	VcPf1N	Unhealthy	Grotta_Vico	VC	White_Cave_Dweller	Cave	Ambient	P.ficiformis	No	Yes	PetrosiaVC	PF5	Bacteria	Proteobacteria	Alphaproteobacteria	Rhodobacterales	Rhodobacteraceae	Family: Rhodobacteraceae	Family: Rhodobacteraceae
f5d32d7802a34cd4242d1ef82b5f90b1	481	VcPf1N	Unhealthy	Grotta_Vico	VC	White_Cave_Dweller	Cave	Ambient	P.ficiformis	No	Yes	PetrosiaVC	PF5	Bacteria	Actinobacteriota	Acidimicrobiia	Microtrichales	Microtrichaceae	Sva0996_group	Genus: Sva0996_group
aeb05fc151e2587db289cf08effc3726	473	VcPf1N	Unhealthy	Grotta_Vico	VC	White_Cave_Dweller	Cave	Ambient	P.ficiformis	No	Yes	PetrosiaVC	PF5	Bacteria	Proteobacteria	Alphaproteobacteria	Caulobacterales	Hyphomonadaceae	Family: Hyphomonadaceae	Family: Hyphomonadaceae
8e2575469919ac5a31bcb8bc6089ac1e	450	VcPf1N	Unhealthy	Grotta_Vico	VC	White_Cave_Dweller	Cave	Ambient	P.ficiformis	No	Yes	PetrosiaVC	PF5	Bacteria	Proteobacteria	Alphaproteobacteria	Rhodobacterales	Rhodobacteraceae	Silicimonas	Genus: Silicimonas
185bd0ac3aa892cc28f88adf6aa04990	428	VcPf1N	Unhealthy	Grotta_Vico	VC	White_Cave_Dweller	Cave	Ambient	P.ficiformis	No	Yes	PetrosiaVC	PF5	Bacteria	Bacteroidota	Bacteroidia	Sphingobacteriales	Lentimicrobiaceae	Lentimicrobiaceae	Genus: Lentimicrobiaceae
e591130b8ed48a7ac4739ca3bbc2e797	428	VcPf1N	Unhealthy	Grotta_Vico	VC	White_Cave_Dweller	Cave	Ambient	P.ficiformis	No	Yes	PetrosiaVC	PF5	Bacteria	Bacteroidota	Bacteroidia	Cytophagales	Cyclobacteriaceae	Ekhidna	Genus: Ekhidna
98911f49c66daec8d9a1a6a6ced92a0a	416	VcPf1N	Unhealthy	Grotta_Vico	VC	White_Cave_Dweller	Cave	Ambient	P.ficiformis	No	Yes	PetrosiaVC	PF5	Bacteria	Proteobacteria	Alphaproteobacteria	Rhizobiales	Rhizobiaceae	Cohaesibacter	Genus: Cohaesibacter
eb6fcb8b8b07523364885e269b99983e	394	VcPf1N	Unhealthy	Grotta_Vico	VC	White_Cave_Dweller	Cave	Ambient	P.ficiformis	No	Yes	PetrosiaVC	PF5	Bacteria	Firmicutes	Clostridia	Lachnospirales	Lachnospiraceae	Vallitalea	Genus: Vallitalea
54e1f936f4ca95f295b290a99dc42ee7	391	VcPf1N	Unhealthy	Grotta_Vico	VC	White_Cave_Dweller	Cave	Ambient	P.ficiformis	No	Yes	PetrosiaVC	PF5	Bacteria	Bacteroidota	Bacteroidia	Bacteroidales	Order: Bacteroidales	Order: Bacteroidales	Order: Bacteroidales
45451d1f78591c7f84a21073c28f0638	350	VcPf1N	Unhealthy	Grotta_Vico	VC	White_Cave_Dweller	Cave	Ambient	P.ficiformis	No	Yes	PetrosiaVC	PF5	Bacteria	Bacteroidota	Bacteroidia	Sphingobacteriales	Lentimicrobiaceae	Lentimicrobiaceae	Genus: Lentimicrobiaceae
5303818b1be537c0c5062459bd7565a4	347	VcPf1N	Unhealthy	Grotta_Vico	VC	White_Cave_Dweller	Cave	Ambient	P.ficiformis	No	Yes	PetrosiaVC	PF5	Bacteria	Firmicutes	Clostridia	Lachnospirales	Lachnospiraceae	Family: Lachnospiraceae	Family: Lachnospiraceae
70c9ffb64ee450b31d8a1656a2fdcf04	339	VcPf1N	Unhealthy	Grotta_Vico	VC	White_Cave_Dweller	Cave	Ambient	P.ficiformis	No	Yes	PetrosiaVC	PF5	Bacteria	Bacteroidota	Bacteroidia	Bacteroidales	Prolixibacteraceae	Sunxiuqinia	Genus: Sunxiuqinia
25906049e5663e466a5c64bf659aa032	325	VcPf1N	Unhealthy	Grotta_Vico	VC	White_Cave_Dweller	Cave	Ambient	P.ficiformis	No	Yes	PetrosiaVC	PF5	Bacteria	Proteobacteria	Alphaproteobacteria	Parvibaculales	Parvibaculaceae	Candidatus_Phaeomarinobacter	Candidatus_Phaeomarinobacter
ff422a9e9d333cc15d211e599c2dbafd	307	VcPf1N	Unhealthy	Grotta_Vico	VC	White_Cave_Dweller	Cave	Ambient	P.ficiformis	No	Yes	PetrosiaVC	PF5	Bacteria	Proteobacteria	Alphaproteobacteria	Rhizobiales	Rhizobiaceae	Pseudahrensia	Genus: Pseudahrensia
4933083f402b0c20f01852c301cb35b2	293	VcPf1N	Unhealthy	Grotta_Vico	VC	White_Cave_Dweller	Cave	Ambient	P.ficiformis	No	Yes	PetrosiaVC	PF5	Bacteria	Firmicutes	Clostridia	Lachnospirales	Order: Lachnospirales	Order: Lachnospirales	Order: Lachnospirales
9f257155da4d6c4ebadbfd31bb10cdc2	281	VcPf1N	Unhealthy	Grotta_Vico	VC	White_Cave_Dweller	Cave	Ambient	P.ficiformis	No	Yes	PetrosiaVC	PF5	Bacteria	Firmicutes	Clostridia	Lachnospirales	Order: Lachnospirales	Order: Lachnospirales	Order: Lachnospirales
aed7235d12b16c7b33c6305980df0586	275	VcPf1N	Unhealthy	Grotta_Vico	VC	White_Cave_Dweller	Cave	Ambient	P.ficiformis	No	Yes	PetrosiaVC	PF5	Bacteria	Proteobacteria	Alphaproteobacteria	Class: Alphaproteobacteria	Class: Alphaproteobacteria	Class: Alphaproteobacteria	Class: Alphaproteobacteria
06e4201170fea37afe2d2f26d543809e	253	VcPf1N	Unhealthy	Grotta_Vico	VC	White_Cave_Dweller	Cave	Ambient	P.ficiformis	No	Yes	PetrosiaVC	PF5	Bacteria	Proteobacteria	Alphaproteobacteria	Rhizobiales	Devosiaceae	Family: Devosiaceae	Family: Devosiaceae
69a4e63ce43fae026f1bb68b4938cf07	248	VcPf1N	Unhealthy	Grotta_Vico	VC	White_Cave_Dweller	Cave	Ambient	P.ficiformis	No	Yes	PetrosiaVC	PF5	Bacteria	Firmicutes	Clostridia	Lachnospirales	Lachnospiraceae	Vallitalea	Genus: Vallitalea
ca6d803969882326d7a703416e06c541	242	VcPf1N	Unhealthy	Grotta_Vico	VC	White_Cave_Dweller	Cave	Ambient	P.ficiformis	No	Yes	PetrosiaVC	PF5	Bacteria	Bacteroidota	Bacteroidia	Flavobacteriales	Flavobacteriaceae	Family: Flavobacteriaceae	Family: Flavobacteriaceae
8ae3883b646d42aae6f4f16c2ed0a469	240	VcPf1N	Unhealthy	Grotta_Vico	VC	White_Cave_Dweller	Cave	Ambient	P.ficiformis	No	Yes	PetrosiaVC	PF5	Bacteria	Planctomycetota	Phycisphaerae	Phycisphaerales	Phycisphaeraceae	SM1A02	Genus: SM1A02
913553895ac481d4068b211bfcba3b7f	238	VcPf1N	Unhealthy	Grotta_Vico	VC	White_Cave_Dweller	Cave	Ambient	P.ficiformis	No	Yes	PetrosiaVC	PF5	Bacteria	Cyanobacteria	Vampirivibrionia	Gastranaerophilales	Gastranaerophilales	Gastranaerophilales	Genus: Gastranaerophilales
cf5fc4400263532b4b10d21ed043038b	236	VcPf1N	Unhealthy	Grotta_Vico	VC	White_Cave_Dweller	Cave	Ambient	P.ficiformis	No	Yes	PetrosiaVC	PF5	Bacteria	Bacteroidota	Bacteroidia	Flavobacteriales	Flavobacteriaceae	Family: Flavobacteriaceae	Family: Flavobacteriaceae
7b3730fe1361a4959204c53b8319796d	231	VcPf1N	Unhealthy	Grotta_Vico	VC	White_Cave_Dweller	Cave	Ambient	P.ficiformis	No	Yes	PetrosiaVC	PF5	Bacteria	Planctomycetota	Planctomycetes	Pirellulales	Pirellulaceae	Pirellula	Genus: Pirellula
b88a14ca86dcd66c494b55f28f4166cc	227	VcPf1N	Unhealthy	Grotta_Vico	VC	White_Cave_Dweller	Cave	Ambient	P.ficiformis	No	Yes	PetrosiaVC	PF5	Bacteria	Patescibacteria	Gracilibacteria	Gracilibacteria	Gracilibacteria	Gracilibacteria	Genus: Gracilibacteria
469fd23e40b209476262c0ed2f064d54	206	VcPf1N	Unhealthy	Grotta_Vico	VC	White_Cave_Dweller	Cave	Ambient	P.ficiformis	No	Yes	PetrosiaVC	PF5	Bacteria	Proteobacteria	Gammaproteobacteria	Legionellales	Legionellaceae	Family: Legionellaceae	Family: Legionellaceae
a04cafbce473200d881baa8169b0f3d5	205	VcPf1N	Unhealthy	Grotta_Vico	VC	White_Cave_Dweller	Cave	Ambient	P.ficiformis	No	Yes	PetrosiaVC	PF5	Bacteria	Firmicutes	Clostridia	Clostridia_vadinBB60	Clostridia_vadinBB60	Clostridia_vadinBB60	Genus: Clostridia_vadinBB60
395b5411b568358cfb0b7dc0e507a8b3	199	VcPf1N	Unhealthy	Grotta_Vico	VC	White_Cave_Dweller	Cave	Ambient	P.ficiformis	No	Yes	PetrosiaVC	PF5	Bacteria	Patescibacteria	Gracilibacteria	Gracilibacteria	Gracilibacteria	Gracilibacteria	Genus: Gracilibacteria
33e48452d3c179f27188c0ba493e1c55	198	VcPf1N	Unhealthy	Grotta_Vico	VC	White_Cave_Dweller	Cave	Ambient	P.ficiformis	No	Yes	PetrosiaVC	PF5	Bacteria	Halanaerobiaeota	Halanaerobiia	Halanaerobiales	Halobacteroidaceae	Family: Halobacteroidaceae	Family: Halobacteroidaceae
98d18f62d0ccedb268d77019be8a1a02	193	VcPf1N	Unhealthy	Grotta_Vico	VC	White_Cave_Dweller	Cave	Ambient	P.ficiformis	No	Yes	PetrosiaVC	PF5	Bacteria	Bacteroidota	Bacteroidia	Chitinophagales	Order: Chitinophagales	Order: Chitinophagales	Order: Chitinophagales
e4ac7690abd6e33101493db3c7ef9d0b	188	VcPf1N	Unhealthy	Grotta_Vico	VC	White_Cave_Dweller	Cave	Ambient	P.ficiformis	No	Yes	PetrosiaVC	PF5	Bacteria	Planctomycetota	Planctomycetes	Planctomycetales	Order: Planctomycetales	Order: Planctomycetales	Order: Planctomycetales
e60bc503e7650bd2111bd93d497e462d	181	VcPf1N	Unhealthy	Grotta_Vico	VC	White_Cave_Dweller	Cave	Ambient	P.ficiformis	No	Yes	PetrosiaVC	PF5	Bacteria	Bacteroidota	Bacteroidia	Sphingobacteriales	Lentimicrobiaceae	Lentimicrobiaceae	Genus: Lentimicrobiaceae
e40ce4a0ea37b09f977e6cb14c93f226	181	VcPf1N	Unhealthy	Grotta_Vico	VC	White_Cave_Dweller	Cave	Ambient	P.ficiformis	No	Yes	PetrosiaVC	PF5	Bacteria	Proteobacteria	Alphaproteobacteria	Sneathiellales	Sneathiellaceae	Sneathiella	Genus: Sneathiella
56d4862a419e604bc22596025772b914	179	VcPf1N	Unhealthy	Grotta_Vico	VC	White_Cave_Dweller	Cave	Ambient	P.ficiformis	No	Yes	PetrosiaVC	PF5	Bacteria	Proteobacteria	Alphaproteobacteria	Rhizobiales	Stappiaceae	Labrenzia	Genus: Labrenzia
fa2b855a8c1c0360d560e8eaf02faf33	178	VcPf1N	Unhealthy	Grotta_Vico	VC	White_Cave_Dweller	Cave	Ambient	P.ficiformis	No	Yes	PetrosiaVC	PF5	Bacteria	Proteobacteria	Alphaproteobacteria	Rhizobiales	Rhizobiaceae	Cohaesibacter	Genus: Cohaesibacter
e26eb17c63d112e9deb7d9fefa015fb1	176	VcPf1N	Unhealthy	Grotta_Vico	VC	White_Cave_Dweller	Cave	Ambient	P.ficiformis	No	Yes	PetrosiaVC	PF5	Bacteria	Proteobacteria	Alphaproteobacteria	Rhodobacterales	Rhodobacteraceae	Family: Rhodobacteraceae	Family: Rhodobacteraceae
a462126264e22e118617147fed400e56	175	VcPf1N	Unhealthy	Grotta_Vico	VC	White_Cave_Dweller	Cave	Ambient	P.ficiformis	No	Yes	PetrosiaVC	PF5	Bacteria	Proteobacteria	Gammaproteobacteria	Enterobacterales	Vibrionaceae	Vibrio	Genus: Vibrio
17a4c02dbd7320aaba32c4188007a7c1	170	VcPf1N	Unhealthy	Grotta_Vico	VC	White_Cave_Dweller	Cave	Ambient	P.ficiformis	No	Yes	PetrosiaVC	PF5	Bacteria	Bacteroidota	Bacteroidia	Bacteroidales	Prolixibacteraceae	Draconibacterium	Genus: Draconibacterium
d3d5eef27023c988430b4b1be533f866	169	VcPf1N	Unhealthy	Grotta_Vico	VC	White_Cave_Dweller	Cave	Ambient	P.ficiformis	No	Yes	PetrosiaVC	PF5	Bacteria	Proteobacteria	Gammaproteobacteria	Pseudomonadales	Halieaceae	Halioglobus	Genus: Halioglobus
8adbbf2fd37d287c9c090e288b073cce	168	VcPf1N	Unhealthy	Grotta_Vico	VC	White_Cave_Dweller	Cave	Ambient	P.ficiformis	No	Yes	PetrosiaVC	PF5	Bacteria	Planctomycetota	Planctomycetes	Pirellulales	Pirellulaceae	Pirellula	Genus: Pirellula
9bb9e81e3bc64c7af1ee8e18d2ebea16	167	VcPf1N	Unhealthy	Grotta_Vico	VC	White_Cave_Dweller	Cave	Ambient	P.ficiformis	No	Yes	PetrosiaVC	PF5	Bacteria	Proteobacteria	Alphaproteobacteria	Rhodobacterales	Rhodobacteraceae	Family: Rhodobacteraceae	Family: Rhodobacteraceae
19d109d5317bb37bff1ad387836411a0	163	VcPf1N	Unhealthy	Grotta_Vico	VC	White_Cave_Dweller	Cave	Ambient	P.ficiformis	No	Yes	PetrosiaVC	PF5	Bacteria	Spirochaetota	Spirochaetia	Spirochaetales	Spirochaetaceae	Sediminispirochaeta	Genus: Sediminispirochaeta
58cfca7ecd4068b57b5db92a18050993	161	VcPf1N	Unhealthy	Grotta_Vico	VC	White_Cave_Dweller	Cave	Ambient	P.ficiformis	No	Yes	PetrosiaVC	PF5	Bacteria	Bacteroidota	Bacteroidia	Sphingobacteriales	Lentimicrobiaceae	Lentimicrobiaceae	Genus: Lentimicrobiaceae
38181760878749ab46304af8dac4344a	158	VcPf1N	Unhealthy	Grotta_Vico	VC	White_Cave_Dweller	Cave	Ambient	P.ficiformis	No	Yes	PetrosiaVC	PF5	Bacteria	Bacteroidota	Bacteroidia	Sphingobacteriales	Lentimicrobiaceae	Lentimicrobiaceae	Genus: Lentimicrobiaceae
82f081de99630272c5ad89d3377ce4bc	157	VcPf1N	Unhealthy	Grotta_Vico	VC	White_Cave_Dweller	Cave	Ambient	P.ficiformis	No	Yes	PetrosiaVC	PF5	Bacteria	Firmicutes	Clostridia	Peptostreptococcales-Tissierellales	Caminicellaceae	Paramaledivibacter	Genus: Paramaledivibacter
4ffe55272d052fc39bb03cc8c535f89e	155	VcPf1N	Unhealthy	Grotta_Vico	VC	White_Cave_Dweller	Cave	Ambient	P.ficiformis	No	Yes	PetrosiaVC	PF5	Bacteria	Planctomycetota	Phycisphaerae	Phycisphaerales	Phycisphaeraceae	SM1A02	Genus: SM1A02
52185da0808ef7e60cb9d07e1c0c4033	154	VcPf1N	Unhealthy	Grotta_Vico	VC	White_Cave_Dweller	Cave	Ambient	P.ficiformis	No	Yes	PetrosiaVC	PF5	Bacteria	Bacteroidota	Bacteroidia	Bacteroidales	Prolixibacteraceae	Roseimarinus	Prolixibacteraceae_bacterium
dd64f6542c6653b7cc60d6609c78904a	153	VcPf1N	Unhealthy	Grotta_Vico	VC	White_Cave_Dweller	Cave	Ambient	P.ficiformis	No	Yes	PetrosiaVC	PF5	Bacteria	Planctomycetota	Phycisphaerae	Phycisphaerales	Phycisphaeraceae	JL-ETNP-F27	Genus: JL-ETNP-F27
a3dbc6933818327966f71e1d6f0e754f	151	VcPf1N	Unhealthy	Grotta_Vico	VC	White_Cave_Dweller	Cave	Ambient	P.ficiformis	No	Yes	PetrosiaVC	PF5	Bacteria	Proteobacteria	Alphaproteobacteria	Rhizobiales	Stappiaceae	Labrenzia	Genus: Labrenzia
40cd2c97304a7aef1fd02c14f5d0d71f	149	VcPf1N	Unhealthy	Grotta_Vico	VC	White_Cave_Dweller	Cave	Ambient	P.ficiformis	No	Yes	PetrosiaVC	PF5	Bacteria	Cyanobacteria	Vampirivibrionia	Gastranaerophilales	Gastranaerophilales	Gastranaerophilales	Genus: Gastranaerophilales
e842ad6be7706b920fdc3ae472758f28	149	VcPf1N	Unhealthy	Grotta_Vico	VC	White_Cave_Dweller	Cave	Ambient	P.ficiformis	No	Yes	PetrosiaVC	PF5	Bacteria	Proteobacteria	Alphaproteobacteria	Rhodospirillales	Magnetospiraceae	Family: Magnetospiraceae	Family: Magnetospiraceae
b36e0df6947ce6b9aad631702c0e9f62	148	VcPf1N	Unhealthy	Grotta_Vico	VC	White_Cave_Dweller	Cave	Ambient	P.ficiformis	No	Yes	PetrosiaVC	PF5	Bacteria	Proteobacteria	Alphaproteobacteria	Rhizobiales	Stappiaceae	Labrenzia	Genus: Labrenzia
b1fcd04bfe73e1a42865d8f87da3977e	147	VcPf1N	Unhealthy	Grotta_Vico	VC	White_Cave_Dweller	Cave	Ambient	P.ficiformis	No	Yes	PetrosiaVC	PF5	Bacteria	Cyanobacteria	Vampirivibrionia	Gastranaerophilales	Gastranaerophilales	Gastranaerophilales	Genus: Gastranaerophilales
6f28ec338434a1eba7a103d3850752ab	147	VcPf1N	Unhealthy	Grotta_Vico	VC	White_Cave_Dweller	Cave	Ambient	P.ficiformis	No	Yes	PetrosiaVC	PF5	Bacteria	Firmicutes	Clostridia	Peptostreptococcales-Tissierellales	Fusibacteraceae	Fusibacter	Acidaminobacter_sp.
ad0994f60f424ac4f430dd180c928a13	147	VcPf1N	Unhealthy	Grotta_Vico	VC	White_Cave_Dweller	Cave	Ambient	P.ficiformis	No	Yes	PetrosiaVC	PF5	Bacteria	Proteobacteria	Alphaproteobacteria	Rhizobiales	Stappiaceae	Labrenzia	Genus: Labrenzia
a10bad54f114283f70d694a2a3be0f8f	146	VcPf1N	Unhealthy	Grotta_Vico	VC	White_Cave_Dweller	Cave	Ambient	P.ficiformis	No	Yes	PetrosiaVC	PF5	Bacteria	Firmicutes	Clostridia	Christensenellales	Christensenellaceae	Family: Christensenellaceae	Family: Christensenellaceae
1a43529a6e9a157f71c0280c7dd598b6	146	VcPf1N	Unhealthy	Grotta_Vico	VC	White_Cave_Dweller	Cave	Ambient	P.ficiformis	No	Yes	PetrosiaVC	PF5	Bacteria	Proteobacteria	Alphaproteobacteria	Rhizobiales	Order: Rhizobiales	Order: Rhizobiales	Order: Rhizobiales
7c852a5ed86ac1dcf793b842cd35194d	145	VcPf1N	Unhealthy	Grotta_Vico	VC	White_Cave_Dweller	Cave	Ambient	P.ficiformis	No	Yes	PetrosiaVC	PF5	Bacteria	Planctomycetota	Planctomycetes	Pirellulales	Pirellulaceae	Pir4_lineage	Genus: Pir4_lineage
91f3272352b50ed45535dd9e285cff83	145	VcPf1N	Unhealthy	Grotta_Vico	VC	White_Cave_Dweller	Cave	Ambient	P.ficiformis	No	Yes	PetrosiaVC	PF5	Bacteria	Planctomycetota	Phycisphaerae	Phycisphaerales	Phycisphaeraceae	Family: Phycisphaeraceae	Family: Phycisphaeraceae
adb957ca0cbafe1269751aecaa77bfdd	144	VcPf1N	Unhealthy	Grotta_Vico	VC	White_Cave_Dweller	Cave	Ambient	P.ficiformis	No	Yes	PetrosiaVC	PF5	Bacteria	Proteobacteria	Gammaproteobacteria	Chromatiales	Sedimenticolaceae	Family: Sedimenticolaceae	Family: Sedimenticolaceae
013659e4f3ba442698aa1115b3af1665	143	VcPf1N	Unhealthy	Grotta_Vico	VC	White_Cave_Dweller	Cave	Ambient	P.ficiformis	No	Yes	PetrosiaVC	PF5	Bacteria	Planctomycetota	Planctomycetes	Pirellulales	Pirellulaceae	Blastopirellula	Genus: Blastopirellula
92e78f5d8809ff2c9ae60e0004bcc094	141	VcPf1N	Unhealthy	Grotta_Vico	VC	White_Cave_Dweller	Cave	Ambient	P.ficiformis	No	Yes	PetrosiaVC	PF5	Bacteria	Planctomycetota	Phycisphaerae	Phycisphaerales	Phycisphaeraceae	SM1A02	Genus: SM1A02
4a113aa704c3ef3211b8fdd5ec8ee537	140	VcPf1N	Unhealthy	Grotta_Vico	VC	White_Cave_Dweller	Cave	Ambient	P.ficiformis	No	Yes	PetrosiaVC	PF5	Bacteria	Firmicutes	Clostridia	Oscillospirales	Hungateiclostridiaceae	Family: Hungateiclostridiaceae	Family: Hungateiclostridiaceae
657dd60445beed997adb0c94c9714da8	135	VcPf1N	Unhealthy	Grotta_Vico	VC	White_Cave_Dweller	Cave	Ambient	P.ficiformis	No	Yes	PetrosiaVC	PF5	Bacteria	Firmicutes	Clostridia	MAT-CR-H4-C10	MAT-CR-H4-C10	MAT-CR-H4-C10	Genus: MAT-CR-H4-C10
15f22b1b620c2651d9c8f490082527c3	134	VcPf1N	Unhealthy	Grotta_Vico	VC	White_Cave_Dweller	Cave	Ambient	P.ficiformis	No	Yes	PetrosiaVC	PF5	Bacteria	Cyanobacteria	Vampirivibrionia	Gastranaerophilales	Gastranaerophilales	Gastranaerophilales	Genus: Gastranaerophilales
56b1f6d12a2f7d429114028777af245e	134	VcPf1N	Unhealthy	Grotta_Vico	VC	White_Cave_Dweller	Cave	Ambient	P.ficiformis	No	Yes	PetrosiaVC	PF5	Bacteria	Spirochaetota	Spirochaetia	Spirochaetales	Spirochaetaceae	Spirochaeta_2	Genus: Spirochaeta_2
e2825d5d94cda5d796eb2e3a84d62cc9	129	VcPf1N	Unhealthy	Grotta_Vico	VC	White_Cave_Dweller	Cave	Ambient	P.ficiformis	No	Yes	PetrosiaVC	PF5	Bacteria	Bacteroidota	Bacteroidia	Cytophagales	Cyclobacteriaceae	Fabibacter	Genus: Fabibacter
b43c47fbd172389695d8a8f95dc0be7e	129	VcPf1N	Unhealthy	Grotta_Vico	VC	White_Cave_Dweller	Cave	Ambient	P.ficiformis	No	Yes	PetrosiaVC	PF5	Bacteria	Proteobacteria	Alphaproteobacteria	Rhodobacterales	Rhodobacteraceae	Roseovarius	Genus: Roseovarius
00e152015e7b83615648b5b5b1e07ba1	128	VcPf1N	Unhealthy	Grotta_Vico	VC	White_Cave_Dweller	Cave	Ambient	P.ficiformis	No	Yes	PetrosiaVC	PF5	Bacteria	Firmicutes	Clostridia	Peptostreptococcales-Tissierellales	Caminicellaceae	Paramaledivibacter	Genus: Paramaledivibacter
d713120fdb9c3ef1e0f06ceac69c42cb	126	VcPf1N	Unhealthy	Grotta_Vico	VC	White_Cave_Dweller	Cave	Ambient	P.ficiformis	No	Yes	PetrosiaVC	PF5	Bacteria	Proteobacteria	Alphaproteobacteria	Rhodobacterales	Rhodobacteraceae	Family: Rhodobacteraceae	Family: Rhodobacteraceae
39488cdd4d403315cac68b1405b8493d	125	VcPf1N	Unhealthy	Grotta_Vico	VC	White_Cave_Dweller	Cave	Ambient	P.ficiformis	No	Yes	PetrosiaVC	PF5	Bacteria	Bacteroidota	Bacteroidia	Bacteroidales	Order: Bacteroidales	Order: Bacteroidales	Order: Bacteroidales
f182203a2bee83391f56db8a31db4e95	125	VcPf1N	Unhealthy	Grotta_Vico	VC	White_Cave_Dweller	Cave	Ambient	P.ficiformis	No	Yes	PetrosiaVC	PF5	Bacteria	Bacteroidota	Bacteroidia	Flavobacteriales	Flavobacteriaceae	Family: Flavobacteriaceae	Family: Flavobacteriaceae
0487c442bf115277e5bcc609cd80d09c	124	VcPf1N	Unhealthy	Grotta_Vico	VC	White_Cave_Dweller	Cave	Ambient	P.ficiformis	No	Yes	PetrosiaVC	PF5	Bacteria	Bacteroidota	Kapabacteria	Kapabacteriales	Kapabacteriales	Kapabacteriales	Genus: Kapabacteriales
14636cb561481c62ee5049b694620f69	120	VcPf1N	Unhealthy	Grotta_Vico	VC	White_Cave_Dweller	Cave	Ambient	P.ficiformis	No	Yes	PetrosiaVC	PF5	Bacteria	Firmicutes	Clostridia	Christensenellales	Christensenellaceae	Family: Christensenellaceae	Family: Christensenellaceae
81e1c27062723125ed307460450e5658	119	VcPf1N	Unhealthy	Grotta_Vico	VC	White_Cave_Dweller	Cave	Ambient	P.ficiformis	No	Yes	PetrosiaVC	PF5	Bacteria	Proteobacteria	Alphaproteobacteria	Rhizobiales	Hyphomicrobiaceae	Filomicrobium	Genus: Filomicrobium
d13ef7818c89584ead10559e232e2408	119	VcPf1N	Unhealthy	Grotta_Vico	VC	White_Cave_Dweller	Cave	Ambient	P.ficiformis	No	Yes	PetrosiaVC	PF5	Bacteria	Proteobacteria	Alphaproteobacteria	Rhizobiales	Hyphomicrobiaceae	Filomicrobium	Genus: Filomicrobium
2a3c0e8c87da8788323633351af90df2	118	VcPf1N	Unhealthy	Grotta_Vico	VC	White_Cave_Dweller	Cave	Ambient	P.ficiformis	No	Yes	PetrosiaVC	PF5	Bacteria	Firmicutes	Clostridia	Christensenellales	Christensenellaceae	Family: Christensenellaceae	Family: Christensenellaceae
64444d08a96527c5e2706b874332fb69	117	VcPf1N	Unhealthy	Grotta_Vico	VC	White_Cave_Dweller	Cave	Ambient	P.ficiformis	No	Yes	PetrosiaVC	PF5	Bacteria	Firmicutes	Clostridia	Class: Clostridia	Class: Clostridia	Class: Clostridia	Class: Clostridia
e99606b3903bb640213ed7aca75a8aeb	117	VcPf1N	Unhealthy	Grotta_Vico	VC	White_Cave_Dweller	Cave	Ambient	P.ficiformis	No	Yes	PetrosiaVC	PF5	Bacteria	Planctomycetota	Planctomycetes	Planctomycetales	Rubinisphaeraceae	Rubinisphaera	Genus: Rubinisphaera
7c943a274d2b53837319a3da6909f5fb	117	VcPf1N	Unhealthy	Grotta_Vico	VC	White_Cave_Dweller	Cave	Ambient	P.ficiformis	No	Yes	PetrosiaVC	PF5	Bacteria	Proteobacteria	Gammaproteobacteria	Pseudomonadales	Nitrincolaceae	Family: Nitrincolaceae	Family: Nitrincolaceae
949a2c2434f4cbdac80ea0ceb21e14fa	115	VcPf1N	Unhealthy	Grotta_Vico	VC	White_Cave_Dweller	Cave	Ambient	P.ficiformis	No	Yes	PetrosiaVC	PF5	Bacteria	Planctomycetota	Planctomycetes	Planctomycetales	Rubinisphaeraceae	Family: Rubinisphaeraceae	Family: Rubinisphaeraceae
82cabbc8835f00e46af1413c01d4d69a	113	VcPf1N	Unhealthy	Grotta_Vico	VC	White_Cave_Dweller	Cave	Ambient	P.ficiformis	No	Yes	PetrosiaVC	PF5	Bacteria	Proteobacteria	Alphaproteobacteria	Rhizobiales	Rhizobiaceae	Cohaesibacter	Genus: Cohaesibacter
bdf5d189411a238ae4aa3d0690c76868	112	VcPf1N	Unhealthy	Grotta_Vico	VC	White_Cave_Dweller	Cave	Ambient	P.ficiformis	No	Yes	PetrosiaVC	PF5	Bacteria	Firmicutes	Clostridia	Lachnospirales	Lachnospiraceae	Vallitalea	Genus: Vallitalea
6a06bca14c481386aee3fe05fd20be1f	111	VcPf1N	Unhealthy	Grotta_Vico	VC	White_Cave_Dweller	Cave	Ambient	P.ficiformis	No	Yes	PetrosiaVC	PF5	Bacteria	Myxococcota	Myxococcia	Myxococcales	Myxococcaceae	P3OB-42	Genus: P3OB-42
97f377f1e398a2f5bf120bda612be2f2	110	VcPf1N	Unhealthy	Grotta_Vico	VC	White_Cave_Dweller	Cave	Ambient	P.ficiformis	No	Yes	PetrosiaVC	PF5	Bacteria	Firmicutes	Clostridia	Peptostreptococcales-Tissierellales	Caminicellaceae	Paramaledivibacter	Genus: Paramaledivibacter
37c56a05fe8103777b01fbf609658b28	109	VcPf1N	Unhealthy	Grotta_Vico	VC	White_Cave_Dweller	Cave	Ambient	P.ficiformis	No	Yes	PetrosiaVC	PF5	Bacteria	Firmicutes	Clostridia	Peptostreptococcales-Tissierellales	Anaerovoracaceae	Family: Anaerovoracaceae	Family: Anaerovoracaceae
a40d77484c7e9da046f15250565382fc	109	VcPf1N	Unhealthy	Grotta_Vico	VC	White_Cave_Dweller	Cave	Ambient	P.ficiformis	No	Yes	PetrosiaVC	PF5	Bacteria	Proteobacteria	Alphaproteobacteria	Rhodobacterales	Rhodobacteraceae	Nautella	Genus: Nautella
de4a5caa96eb0d730afbcbbd54800182	109	VcPf1N	Unhealthy	Grotta_Vico	VC	White_Cave_Dweller	Cave	Ambient	P.ficiformis	No	Yes	PetrosiaVC	PF5	Bacteria	SAR324_clade(B)	SAR324_clade(B)	SAR324_clade(B)	SAR324_clade(B)	SAR324_clade(B)	Genus: SAR324_clade(B)
d282a7d531ae269eb5feaac4c977516b	108	VcPf1N	Unhealthy	Grotta_Vico	VC	White_Cave_Dweller	Cave	Ambient	P.ficiformis	No	Yes	PetrosiaVC	PF5	Bacteria	Proteobacteria	Alphaproteobacteria	Rhizobiales	Stappiaceae	Labrenzia	Genus: Labrenzia
ea28eae646de7ea800cb064e481d0d8d	107	VcPf1N	Unhealthy	Grotta_Vico	VC	White_Cave_Dweller	Cave	Ambient	P.ficiformis	No	Yes	PetrosiaVC	PF5	Bacteria	Planctomycetota	Planctomycetes	Planctomycetales	Rubinisphaeraceae	Family: Rubinisphaeraceae	Family: Rubinisphaeraceae
0125241c38e67adea75aacf5dae0ad91	107	VcPf1N	Unhealthy	Grotta_Vico	VC	White_Cave_Dweller	Cave	Ambient	P.ficiformis	No	Yes	PetrosiaVC	PF5	Bacteria	Proteobacteria	Alphaproteobacteria	Parvibaculales	PS1_clade	PS1_clade	Genus: PS1_clade
d5ce9b856774e8b6fd3d06164b37420d	106	VcPf1N	Unhealthy	Grotta_Vico	VC	White_Cave_Dweller	Cave	Ambient	P.ficiformis	No	Yes	PetrosiaVC	PF5	Bacteria	Verrucomicrobiota	Chlamydiae	Chlamydiales	Order: Chlamydiales	Order: Chlamydiales	Order: Chlamydiales
fe3ec11fdcb4169454cffdc75975df54	105	VcPf1N	Unhealthy	Grotta_Vico	VC	White_Cave_Dweller	Cave	Ambient	P.ficiformis	No	Yes	PetrosiaVC	PF5	Bacteria	Firmicutes	Clostridia	Peptostreptococcales-Tissierellales	Anaerovoracaceae	Family: Anaerovoracaceae	Family: Anaerovoracaceae
7ecccd5fafd7450a71095050fea9f671	104	VcPf1N	Unhealthy	Grotta_Vico	VC	White_Cave_Dweller	Cave	Ambient	P.ficiformis	No	Yes	PetrosiaVC	PF5	Bacteria	Proteobacteria	Alphaproteobacteria	Rhodobacterales	Rhodobacteraceae	Ruegeria	Genus: Ruegeria
473fba17218b860f9c4b09f5ad6fb9cc	103	VcPf1N	Unhealthy	Grotta_Vico	VC	White_Cave_Dweller	Cave	Ambient	P.ficiformis	No	Yes	PetrosiaVC	PF5	Bacteria	Bacteroidota	Bacteroidia	Bacteroidales	Marinifilaceae	Family: Marinifilaceae	Family: Marinifilaceae
18613490c6b422a7fe47446febb65dae	102	VcPf1N	Unhealthy	Grotta_Vico	VC	White_Cave_Dweller	Cave	Ambient	P.ficiformis	No	Yes	PetrosiaVC	PF5	Bacteria	Firmicutes	Clostridia	Lachnospirales	Lachnospiraceae	Vallitalea	Genus: Vallitalea
30bdf79fd089d7d8fab5fabb64d6dd29	101	VcPf1N	Unhealthy	Grotta_Vico	VC	White_Cave_Dweller	Cave	Ambient	P.ficiformis	No	Yes	PetrosiaVC	PF5	Bacteria	Bacteroidota	Bacteroidia	Bacteroidales	Marinifilaceae	Family: Marinifilaceae	Family: Marinifilaceae
091b4a281e7e69282049c66fff20d34c	101	VcPf1N	Unhealthy	Grotta_Vico	VC	White_Cave_Dweller	Cave	Ambient	P.ficiformis	No	Yes	PetrosiaVC	PF5	Bacteria	Verrucomicrobiota	Chlamydiae	Chlamydiales	Simkaniaceae	Family: Simkaniaceae	Family: Simkaniaceae
8402e9613e116fabad5c979137d3a787	99	VcPf1N	Unhealthy	Grotta_Vico	VC	White_Cave_Dweller	Cave	Ambient	P.ficiformis	No	Yes	PetrosiaVC	PF5	Bacteria	Planctomycetota	Phycisphaerae	Phycisphaerales	Phycisphaeraceae	SM1A02	Genus: SM1A02
7a54dad541f4044b5fd97b10d0ec3b34	98	VcPf1N	Unhealthy	Grotta_Vico	VC	White_Cave_Dweller	Cave	Ambient	P.ficiformis	No	Yes	PetrosiaVC	PF5	Bacteria	Proteobacteria	Alphaproteobacteria	Rhizobiales	Rhizobiaceae	Cohaesibacter	Cohaesibacter_sp.
c3c33bf8045957c82378ffd19fd59036	97	VcPf1N	Unhealthy	Grotta_Vico	VC	White_Cave_Dweller	Cave	Ambient	P.ficiformis	No	Yes	PetrosiaVC	PF5	Bacteria	Bdellovibrionota	Bdellovibrionia	Bdellovibrionales	Bdellovibrionaceae	Bdellovibrio	Genus: Bdellovibrio
55447b2ebc99578766bbf612b99bd204	97	VcPf1N	Unhealthy	Grotta_Vico	VC	White_Cave_Dweller	Cave	Ambient	P.ficiformis	No	Yes	PetrosiaVC	PF5	Bacteria	Firmicutes	Clostridia	Christensenellales	Christensenellaceae	Family: Christensenellaceae	Family: Christensenellaceae
25d638e6700633ca43ee2b90e092535f	97	VcPf1N	Unhealthy	Grotta_Vico	VC	White_Cave_Dweller	Cave	Ambient	P.ficiformis	No	Yes	PetrosiaVC	PF5	Bacteria	Proteobacteria	Gammaproteobacteria	Pseudomonadales	Nitrincolaceae	Family: Nitrincolaceae	Family: Nitrincolaceae
eb7b16e047f7063c0c1a1e5758ede808	95	VcPf1N	Unhealthy	Grotta_Vico	VC	White_Cave_Dweller	Cave	Ambient	P.ficiformis	No	Yes	PetrosiaVC	PF5	Bacteria	Planctomycetota	Planctomycetes	Pirellulales	Pirellulaceae	Rhodopirellula	planctomycete_MS30D1
179ce616b360fbb4652972885d8e5b84	95	VcPf1N	Unhealthy	Grotta_Vico	VC	White_Cave_Dweller	Cave	Ambient	P.ficiformis	No	Yes	PetrosiaVC	PF5	Bacteria	Proteobacteria	Alphaproteobacteria	Rhodobacterales	Rhodobacteraceae	Ruegeria	Genus: Ruegeria
313740c3d458b49c1310544c7080affc	95	VcPf1N	Unhealthy	Grotta_Vico	VC	White_Cave_Dweller	Cave	Ambient	P.ficiformis	No	Yes	PetrosiaVC	PF5	Bacteria	Proteobacteria	Alphaproteobacteria	Rhodobacterales	Rhodobacteraceae	Ruegeria	Genus: Ruegeria
66ebe91d7cc67cec500c76d01706c739	92	VcPf1N	Unhealthy	Grotta_Vico	VC	White_Cave_Dweller	Cave	Ambient	P.ficiformis	No	Yes	PetrosiaVC	PF5	Bacteria	Firmicutes	Clostridia	Oscillospirales	Hungateiclostridiaceae	Family: Hungateiclostridiaceae	Family: Hungateiclostridiaceae
347b70773bea277cdfdfef746e3073c9	90	VcPf1N	Unhealthy	Grotta_Vico	VC	White_Cave_Dweller	Cave	Ambient	P.ficiformis	No	Yes	PetrosiaVC	PF5	Bacteria	Proteobacteria	Alphaproteobacteria	Rhodobacterales	Rhodobacteraceae	Family: Rhodobacteraceae	Family: Rhodobacteraceae
bde27bb8e3b68b0e98aa604ac47994bf	89	VcPf1N	Unhealthy	Grotta_Vico	VC	White_Cave_Dweller	Cave	Ambient	P.ficiformis	No	Yes	PetrosiaVC	PF5	Bacteria	Planctomycetota	Phycisphaerae	Phycisphaerales	Phycisphaeraceae	SM1A02	Genus: SM1A02
acd13437e0fdedc2dbb4f5d395af59f8	89	VcPf1N	Unhealthy	Grotta_Vico	VC	White_Cave_Dweller	Cave	Ambient	P.ficiformis	No	Yes	PetrosiaVC	PF5	Bacteria	Proteobacteria	Gammaproteobacteria	Pseudomonadales	Nitrincolaceae	Family: Nitrincolaceae	Family: Nitrincolaceae
5b284059e57a5d7d88d581b7c6525b76	89	VcPf1N	Unhealthy	Grotta_Vico	VC	White_Cave_Dweller	Cave	Ambient	P.ficiformis	No	Yes	PetrosiaVC	PF5	Bacteria	Verrucomicrobiota	Verrucomicrobiae	Opitutales	Puniceicoccaceae	Verruc-01	Genus: Verruc-01
093f2e1b46d8e5022402f44f122ac85b	88	VcPf1N	Unhealthy	Grotta_Vico	VC	White_Cave_Dweller	Cave	Ambient	P.ficiformis	No	Yes	PetrosiaVC	PF5	Bacteria	Patescibacteria	Parcubacteria	Candidatus_Kaiserbacteria	Candidatus_Kaiserbacteria	Candidatus_Kaiserbacteria	Genus: Candidatus_Kaiserbacteria
36026851f9aede9dedc3268a30e20399	87	VcPf1N	Unhealthy	Grotta_Vico	VC	White_Cave_Dweller	Cave	Ambient	P.ficiformis	No	Yes	PetrosiaVC	PF5	Bacteria	Planctomycetota	Phycisphaerae	Phycisphaerales	Phycisphaeraceae	SM1A02	Genus: SM1A02
053da4deeb1e46c81a4731a986d2309e	85	VcPf1N	Unhealthy	Grotta_Vico	VC	White_Cave_Dweller	Cave	Ambient	P.ficiformis	No	Yes	PetrosiaVC	PF5	Bacteria	Planctomycetota	Planctomycetes	Pirellulales	Pirellulaceae	Pirellula	Genus: Pirellula
fc1bfe31c76aff4bf963b830a31689b4	84	VcPf1N	Unhealthy	Grotta_Vico	VC	White_Cave_Dweller	Cave	Ambient	P.ficiformis	No	Yes	PetrosiaVC	PF5	Bacteria	Bacteroidota	Bacteroidia	Flavobacteriales	Cryomorphaceae	Vicingus	Genus: Vicingus
96efef0656407053396a2e23c549837e	84	VcPf1N	Unhealthy	Grotta_Vico	VC	White_Cave_Dweller	Cave	Ambient	P.ficiformis	No	Yes	PetrosiaVC	PF5	Bacteria	Planctomycetota	Phycisphaerae	Phycisphaerales	Phycisphaeraceae	SM1A02	Genus: SM1A02
c555e572ada4bab560c47f112f147482	82	VcPf1N	Unhealthy	Grotta_Vico	VC	White_Cave_Dweller	Cave	Ambient	P.ficiformis	No	Yes	PetrosiaVC	PF5	Bacteria	Bacteroidota	Bacteroidia	Flavobacteriales	Flavobacteriaceae	Family: Flavobacteriaceae	Family: Flavobacteriaceae
13ac0ffd32fa5db978d64371e0453933	78	VcPf1N	Unhealthy	Grotta_Vico	VC	White_Cave_Dweller	Cave	Ambient	P.ficiformis	No	Yes	PetrosiaVC	PF5	Bacteria	Hydrogenedentes	Hydrogenedentia	Hydrogenedentiales	Hydrogenedensaceae	Hydrogenedensaceae	Genus: Hydrogenedensaceae
c1192cf18e71941c54cae65022940c99	77	VcPf1N	Unhealthy	Grotta_Vico	VC	White_Cave_Dweller	Cave	Ambient	P.ficiformis	No	Yes	PetrosiaVC	PF5	Bacteria	Firmicutes	Clostridia	Oscillospirales	[Eubacterium]_coprostanoligenes	[Eubacterium]_coprostanoligenes	Genus: [Eubacterium]_coprostanoligenes
736ae2884b9ac93d8f0064dde7e08831	77	VcPf1N	Unhealthy	Grotta_Vico	VC	White_Cave_Dweller	Cave	Ambient	P.ficiformis	No	Yes	PetrosiaVC	PF5	Bacteria	Proteobacteria	Alphaproteobacteria	Rhizobiales	Stappiaceae	Labrenzia	Genus: Labrenzia
6d3632571a730b6cd788ec033f162cc7	76	VcPf1N	Unhealthy	Grotta_Vico	VC	White_Cave_Dweller	Cave	Ambient	P.ficiformis	No	Yes	PetrosiaVC	PF5	Bacteria	Firmicutes	Clostridia	Clostridia_vadinBB60	Clostridia_vadinBB60	Clostridia_vadinBB60	Genus: Clostridia_vadinBB60
aedecedba4f68707fc4598ef3f7646c4	74	VcPf1N	Unhealthy	Grotta_Vico	VC	White_Cave_Dweller	Cave	Ambient	P.ficiformis	No	Yes	PetrosiaVC	PF5	Bacteria	Firmicutes	Clostridia	Oscillospirales	Hungateiclostridiaceae	Ruminiclostridium	Genus: Ruminiclostridium
0f34cc6ca4b338c45568d152259435e9	74	VcPf1N	Unhealthy	Grotta_Vico	VC	White_Cave_Dweller	Cave	Ambient	P.ficiformis	No	Yes	PetrosiaVC	PF5	Bacteria	Proteobacteria	Alphaproteobacteria	Kordiimonadales	Order: Kordiimonadales	Order: Kordiimonadales	Order: Kordiimonadales
5c3bbf330998482a4f281aedc1250c00	74	VcPf1N	Unhealthy	Grotta_Vico	VC	White_Cave_Dweller	Cave	Ambient	P.ficiformis	No	Yes	PetrosiaVC	PF5	Bacteria	Proteobacteria	Alphaproteobacteria	Rhizobiales	Hyphomicrobiaceae	Filomicrobium	Genus: Filomicrobium
b098b708bad8bb7e79e894e9668491f6	74	VcPf1N	Unhealthy	Grotta_Vico	VC	White_Cave_Dweller	Cave	Ambient	P.ficiformis	No	Yes	PetrosiaVC	PF5	Bacteria	Proteobacteria	Alphaproteobacteria	Rickettsiales	SM2D12	SM2D12	Genus: SM2D12
dcccfead9b7a30e12e1cc1095b3e4725	73	VcPf1N	Unhealthy	Grotta_Vico	VC	White_Cave_Dweller	Cave	Ambient	P.ficiformis	No	Yes	PetrosiaVC	PF5	Bacteria	Bacteroidota	Bacteroidia	Flavobacteriales	Flavobacteriaceae	Aquibacter	Genus: Aquibacter
aa53a54af60235f6192045941b557b80	73	VcPf1N	Unhealthy	Grotta_Vico	VC	White_Cave_Dweller	Cave	Ambient	P.ficiformis	No	Yes	PetrosiaVC	PF5	Bacteria	Proteobacteria	Alphaproteobacteria	Rhizobiales	Rhizobiaceae	Cohaesibacter	Genus: Cohaesibacter
59e1598984b70bff32b89505d111e730	72	VcPf1N	Unhealthy	Grotta_Vico	VC	White_Cave_Dweller	Cave	Ambient	P.ficiformis	No	Yes	PetrosiaVC	PF5	Bacteria	Proteobacteria	Alphaproteobacteria	Puniceispirillales	Order: Puniceispirillales	Order: Puniceispirillales	Order: Puniceispirillales
cf087dfd0b929370cee50d8c844aaade	72	VcPf1N	Unhealthy	Grotta_Vico	VC	White_Cave_Dweller	Cave	Ambient	P.ficiformis	No	Yes	PetrosiaVC	PF5	Bacteria	Proteobacteria	Alphaproteobacteria	Parvibaculales	PS1_clade	PS1_clade	Genus: PS1_clade
7d2e3664d5b1e8b3935b177d8afd9968	71	VcPf1N	Unhealthy	Grotta_Vico	VC	White_Cave_Dweller	Cave	Ambient	P.ficiformis	No	Yes	PetrosiaVC	PF5	Bacteria	Planctomycetota	Planctomycetes	Pirellulales	Pirellulaceae	Blastopirellula	Genus: Blastopirellula
670da3bed7e86a49ed6306054ef013f7	69	VcPf1N	Unhealthy	Grotta_Vico	VC	White_Cave_Dweller	Cave	Ambient	P.ficiformis	No	Yes	PetrosiaVC	PF5	Bacteria	Bacteroidota	Bacteroidia	Flavobacteriales	Flavobacteriaceae	Psychroserpens	Genus: Psychroserpens
30c727371f35747c1e3364be6eeed160	68	VcPf1N	Unhealthy	Grotta_Vico	VC	White_Cave_Dweller	Cave	Ambient	P.ficiformis	No	Yes	PetrosiaVC	PF5	Bacteria	Cyanobacteria	Vampirivibrionia	Caenarcaniphilales	Caenarcaniphilales	Caenarcaniphilales	Genus: Caenarcaniphilales
39e4a85baca4f19064eb98d7b8313261	68	VcPf1N	Unhealthy	Grotta_Vico	VC	White_Cave_Dweller	Cave	Ambient	P.ficiformis	No	Yes	PetrosiaVC	PF5	Bacteria	Desulfobacterota	Desulfobacteria	Desulfobacterales	Desulfobacteraceae	Family: Desulfobacteraceae	Family: Desulfobacteraceae
7e0e395bd6748e660c592f63d0e88f70	68	VcPf1N	Unhealthy	Grotta_Vico	VC	White_Cave_Dweller	Cave	Ambient	P.ficiformis	No	Yes	PetrosiaVC	PF5	Bacteria	Firmicutes	Clostridia	Clostridia_vadinBB60	Clostridia_vadinBB60	Clostridia_vadinBB60	Genus: Clostridia_vadinBB60
13d1aa480b520c6cfae217e8bd8824ef	67	VcPf1N	Unhealthy	Grotta_Vico	VC	White_Cave_Dweller	Cave	Ambient	P.ficiformis	No	Yes	PetrosiaVC	PF5	Bacteria	Proteobacteria	Alphaproteobacteria	Micavibrionales	Micavibrionaceae	Family: Micavibrionaceae	Family: Micavibrionaceae
68b2b365e666ed771904a31e3ff3ad43	67	VcPf1N	Unhealthy	Grotta_Vico	VC	White_Cave_Dweller	Cave	Ambient	P.ficiformis	No	Yes	PetrosiaVC	PF5	Bacteria	Proteobacteria	Alphaproteobacteria	Micavibrionales	Micavibrionaceae	Family: Micavibrionaceae	Family: Micavibrionaceae
52ef3b81baf214fef4487b88ab2322d5	66	VcPf1N	Unhealthy	Grotta_Vico	VC	White_Cave_Dweller	Cave	Ambient	P.ficiformis	No	Yes	PetrosiaVC	PF5	Bacteria	Firmicutes	Clostridia	Lachnospirales	Order: Lachnospirales	Order: Lachnospirales	Order: Lachnospirales
eb14467a48ed07ce15e5fd6fbb4cb19b	66	VcPf1N	Unhealthy	Grotta_Vico	VC	White_Cave_Dweller	Cave	Ambient	P.ficiformis	No	Yes	PetrosiaVC	PF5	Bacteria	Myxococcota	Polyangia	Nannocystales	Nannocystaceae	Family: Nannocystaceae	Family: Nannocystaceae
0da5131d9d0fba61dc939f4c9e974819	66	VcPf1N	Unhealthy	Grotta_Vico	VC	White_Cave_Dweller	Cave	Ambient	P.ficiformis	No	Yes	PetrosiaVC	PF5	Bacteria	Planctomycetota	Planctomycetes	Pirellulales	Pirellulaceae	Bythopirellula	Genus: Bythopirellula
1f86c39c6ca6e0e0d8b32fd7698a1bf9	66	VcPf1N	Unhealthy	Grotta_Vico	VC	White_Cave_Dweller	Cave	Ambient	P.ficiformis	No	Yes	PetrosiaVC	PF5	Bacteria	Proteobacteria	Alphaproteobacteria	Rhizobiales	Hyphomicrobiaceae	Filomicrobium	Genus: Filomicrobium
3d2fa994cabeca553e88ddb89640ec11	66	VcPf1N	Unhealthy	Grotta_Vico	VC	White_Cave_Dweller	Cave	Ambient	P.ficiformis	No	Yes	PetrosiaVC	PF5	Bacteria	Verrucomicrobiota	Lentisphaeria	P.palmC41	P.palmC41	P.palmC41	Genus: P.palmC41
232aafea289029e910643192e0dcefe5	65	VcPf1N	Unhealthy	Grotta_Vico	VC	White_Cave_Dweller	Cave	Ambient	P.ficiformis	No	Yes	PetrosiaVC	PF5	Bacteria	Planctomycetota	Phycisphaerae	Phycisphaerales	Phycisphaeraceae	SM1A02	Genus: SM1A02
3e28f2a37d1dab674fa4c14e7541b094	65	VcPf1N	Unhealthy	Grotta_Vico	VC	White_Cave_Dweller	Cave	Ambient	P.ficiformis	No	Yes	PetrosiaVC	PF5	Bacteria	Planctomycetota	Planctomycetes	Planctomycetales	Order: Planctomycetales	Order: Planctomycetales	Order: Planctomycetales
dadcc7cece08759d706c1227efcef12f	65	VcPf1N	Unhealthy	Grotta_Vico	VC	White_Cave_Dweller	Cave	Ambient	P.ficiformis	No	Yes	PetrosiaVC	PF5	Bacteria	Proteobacteria	Alphaproteobacteria	Micavibrionales	Micavibrionaceae	Family: Micavibrionaceae	Family: Micavibrionaceae
34395efab2c6339a6c22573ead2408e4	64	VcPf1N	Unhealthy	Grotta_Vico	VC	White_Cave_Dweller	Cave	Ambient	P.ficiformis	No	Yes	PetrosiaVC	PF5	Bacteria	Proteobacteria	Alphaproteobacteria	Class: Alphaproteobacteria	Class: Alphaproteobacteria	Class: Alphaproteobacteria	Class: Alphaproteobacteria
6746c3aaf747b3a23bc0ef8d402d0b37	63	VcPf1N	Unhealthy	Grotta_Vico	VC	White_Cave_Dweller	Cave	Ambient	P.ficiformis	No	Yes	PetrosiaVC	PF5	Bacteria	Proteobacteria	Alphaproteobacteria	Rhizobiales	Stappiaceae	Labrenzia	Genus: Labrenzia
1cb55e255a8101ef324b06f4dfb64c2f	62	VcPf1N	Unhealthy	Grotta_Vico	VC	White_Cave_Dweller	Cave	Ambient	P.ficiformis	No	Yes	PetrosiaVC	PF5	Bacteria	Firmicutes	Clostridia	Lachnospirales	Lachnospiraceae	Vallitalea	Genus: Vallitalea
8af63afb3a7b6b4d139cd55b5d5aeb9f	62	VcPf1N	Unhealthy	Grotta_Vico	VC	White_Cave_Dweller	Cave	Ambient	P.ficiformis	No	Yes	PetrosiaVC	PF5	Bacteria	Proteobacteria	Alphaproteobacteria	Rhodobacterales	Rhodobacteraceae	Shimia	Genus: Shimia
836b0c5ac747695f9abe53cf1a1e38b5	61	VcPf1N	Unhealthy	Grotta_Vico	VC	White_Cave_Dweller	Cave	Ambient	P.ficiformis	No	Yes	PetrosiaVC	PF5	Bacteria	Desulfobacterota	Desulfovibrionia	Desulfovibrionales	Desulfovibrionaceae	Halodesulfovibrio	Genus: Halodesulfovibrio
f3d0fd0850a5a139fd798e81a661bc63	58	VcPf1N	Unhealthy	Grotta_Vico	VC	White_Cave_Dweller	Cave	Ambient	P.ficiformis	No	Yes	PetrosiaVC	PF5	Bacteria	Kingdom: Bacteria	Kingdom: Bacteria	Kingdom: Bacteria	Kingdom: Bacteria	Kingdom: Bacteria	Kingdom: Bacteria
1eea9ba5b1c809acf260065653fd7d24	56	VcPf1N	Unhealthy	Grotta_Vico	VC	White_Cave_Dweller	Cave	Ambient	P.ficiformis	No	Yes	PetrosiaVC	PF5	Bacteria	Bacteroidota	Bacteroidia	Bacteroidales	Marinilabiliaceae	Family: Marinilabiliaceae	Family: Marinilabiliaceae
d4e76296c2f087a0f712f8671a1fac2d	56	VcPf1N	Unhealthy	Grotta_Vico	VC	White_Cave_Dweller	Cave	Ambient	P.ficiformis	No	Yes	PetrosiaVC	PF5	Bacteria	Patescibacteria	Parcubacteria	Candidatus_Campbellbacteria	Candidatus_Campbellbacteria	Candidatus_Campbellbacteria	Genus: Candidatus_Campbellbacteria
b479f818c9c1b364402d35499413cd9b	56	VcPf1N	Unhealthy	Grotta_Vico	VC	White_Cave_Dweller	Cave	Ambient	P.ficiformis	No	Yes	PetrosiaVC	PF5	Bacteria	Planctomycetota	Planctomycetes	Pirellulales	Pirellulaceae	Rhodopirellula	Genus: Rhodopirellula
58854ff785dd18ed6336b2bf51cc351e	56	VcPf1N	Unhealthy	Grotta_Vico	VC	White_Cave_Dweller	Cave	Ambient	P.ficiformis	No	Yes	PetrosiaVC	PF5	Bacteria	Proteobacteria	Alphaproteobacteria	Rhizobiales	Rhizobiaceae	Pseudahrensia	Genus: Pseudahrensia
dcfe7d83883c9105072ba5cfca2fdcfc	56	VcPf1N	Unhealthy	Grotta_Vico	VC	White_Cave_Dweller	Cave	Ambient	P.ficiformis	No	Yes	PetrosiaVC	PF5	Bacteria	Spirochaetota	Spirochaetia	Spirochaetales	Spirochaetaceae	Sediminispirochaeta	Genus: Sediminispirochaeta
d701902f24611d1b7c1867ebe1ea2b8e	55	VcPf1N	Unhealthy	Grotta_Vico	VC	White_Cave_Dweller	Cave	Ambient	P.ficiformis	No	Yes	PetrosiaVC	PF5	Bacteria	Bacteroidota	Bacteroidia	Cytophagales	Cyclobacteriaceae	Reichenbachiella	Genus: Reichenbachiella
65986b67b9bab86237ace5593f6b954d	55	VcPf1N	Unhealthy	Grotta_Vico	VC	White_Cave_Dweller	Cave	Ambient	P.ficiformis	No	Yes	PetrosiaVC	PF5	Bacteria	Proteobacteria	Alphaproteobacteria	Caulobacterales	Hyphomonadaceae	Family: Hyphomonadaceae	Family: Hyphomonadaceae
83514ed600ec07850a811e9625e7ea68	54	VcPf1N	Unhealthy	Grotta_Vico	VC	White_Cave_Dweller	Cave	Ambient	P.ficiformis	No	Yes	PetrosiaVC	PF5	Bacteria	Bacteroidota	Bacteroidia	Bacteroidales	Marinifilaceae	Family: Marinifilaceae	Family: Marinifilaceae
7a306923cde42327ff1e2569d95db4be	54	VcPf1N	Unhealthy	Grotta_Vico	VC	White_Cave_Dweller	Cave	Ambient	P.ficiformis	No	Yes	PetrosiaVC	PF5	Bacteria	Planctomycetota	Phycisphaerae	Phycisphaerales	Phycisphaeraceae	SM1A02	Genus: SM1A02
7e77d23f83b76bb5090b4761401fea03	53	VcPf1N	Unhealthy	Grotta_Vico	VC	White_Cave_Dweller	Cave	Ambient	P.ficiformis	No	Yes	PetrosiaVC	PF5	Bacteria	Bacteroidota	Bacteroidia	Flavobacteriales	Cryomorphaceae	Family: Cryomorphaceae	Family: Cryomorphaceae
5c3512c6a372904177f16174f0d26680	53	VcPf1N	Unhealthy	Grotta_Vico	VC	White_Cave_Dweller	Cave	Ambient	P.ficiformis	No	Yes	PetrosiaVC	PF5	Bacteria	Desulfobacterota	Desulfobacteria	Desulfobacterales	Desulfobacteraceae	Family: Desulfobacteraceae	Family: Desulfobacteraceae
5456eacf7c22325111d7397ff7160e7c	52	VcPf1N	Unhealthy	Grotta_Vico	VC	White_Cave_Dweller	Cave	Ambient	P.ficiformis	No	Yes	PetrosiaVC	PF5	Bacteria	Firmicutes	Clostridia	Peptostreptococcales-Tissierellales	Dethiosulfatibacteraceae	Dethiosulfatibacter	Genus: Dethiosulfatibacter
bab865cb08b43c650cb4d1ed2e4c5835	52	VcPf1N	Unhealthy	Grotta_Vico	VC	White_Cave_Dweller	Cave	Ambient	P.ficiformis	No	Yes	PetrosiaVC	PF5	Bacteria	Planctomycetota	Phycisphaerae	Phycisphaerales	Phycisphaeraceae	SM1A02	Genus: SM1A02
34fb1cd79275964d4b4a4696119cfea9	52	VcPf1N	Unhealthy	Grotta_Vico	VC	White_Cave_Dweller	Cave	Ambient	P.ficiformis	No	Yes	PetrosiaVC	PF5	Bacteria	Proteobacteria	Alphaproteobacteria	Rhodobacterales	Rhodobacteraceae	Pseudophaeobacter	Genus: Pseudophaeobacter
d8ffaae0b506990b12494098782bb5e0	51	VcPf1N	Unhealthy	Grotta_Vico	VC	White_Cave_Dweller	Cave	Ambient	P.ficiformis	No	Yes	PetrosiaVC	PF5	Bacteria	Proteobacteria	Alphaproteobacteria	Rhodobacterales	Rhodobacteraceae	Family: Rhodobacteraceae	Family: Rhodobacteraceae
dc5cb8af9f45fd94fb98ec741a531eec	50	VcPf1N	Unhealthy	Grotta_Vico	VC	White_Cave_Dweller	Cave	Ambient	P.ficiformis	No	Yes	PetrosiaVC	PF5	Bacteria	Proteobacteria	Alphaproteobacteria	Rickettsiales	SM2D12	SM2D12	Genus: SM2D12
305ded74c1fd06af7eb7ef02a5a25695	49	VcPf1N	Unhealthy	Grotta_Vico	VC	White_Cave_Dweller	Cave	Ambient	P.ficiformis	No	Yes	PetrosiaVC	PF5	Bacteria	Desulfobacterota	Desulfuromonadia	PB19	PB19	PB19	Genus: PB19
7f93c883ae7b1c46e3fcd6d5eb4d5e24	49	VcPf1N	Unhealthy	Grotta_Vico	VC	White_Cave_Dweller	Cave	Ambient	P.ficiformis	No	Yes	PetrosiaVC	PF5	Bacteria	Firmicutes	Clostridia	Oscillospirales	Hungateiclostridiaceae	Ruminiclostridium	Genus: Ruminiclostridium
e95e282b5fb14a3e7d1034cf84683e45	49	VcPf1N	Unhealthy	Grotta_Vico	VC	White_Cave_Dweller	Cave	Ambient	P.ficiformis	No	Yes	PetrosiaVC	PF5	Bacteria	Firmicutes	Clostridia	Clostridia_vadinBB60	Clostridia_vadinBB60	Clostridia_vadinBB60	Genus: Clostridia_vadinBB60
2bfd7ec7f83eb3eaf972c29e82af0ab4	49	VcPf1N	Unhealthy	Grotta_Vico	VC	White_Cave_Dweller	Cave	Ambient	P.ficiformis	No	Yes	PetrosiaVC	PF5	Bacteria	Proteobacteria	Alphaproteobacteria	Rhodobacterales	Rhodobacteraceae	Ruegeria	Genus: Ruegeria
73a4bdae7e76528fc84795da3de5fea8	48	VcPf1N	Unhealthy	Grotta_Vico	VC	White_Cave_Dweller	Cave	Ambient	P.ficiformis	No	Yes	PetrosiaVC	PF5	Bacteria	Myxococcota	Polyangia	Nannocystales	Nannocystaceae	Family: Nannocystaceae	Family: Nannocystaceae
a9a440943d5212dbaff8ded44a050365	47	VcPf1N	Unhealthy	Grotta_Vico	VC	White_Cave_Dweller	Cave	Ambient	P.ficiformis	No	Yes	PetrosiaVC	PF5	Bacteria	Bacteroidota	Bacteroidia	Bacteroidales	Prolixibacteraceae	Sunxiuqinia	Genus: Sunxiuqinia
6cd15f1d65ad7371c9301ace7a349050	47	VcPf1N	Unhealthy	Grotta_Vico	VC	White_Cave_Dweller	Cave	Ambient	P.ficiformis	No	Yes	PetrosiaVC	PF5	Archaea	Nanoarchaeota	Nanoarchaeia	Woesearchaeales	Woesearchaeales	Woesearchaeales	Genus: Woesearchaeales
04d00fdeabf3a1d0863f2a1b5d31b778	47	VcPf1N	Unhealthy	Grotta_Vico	VC	White_Cave_Dweller	Cave	Ambient	P.ficiformis	No	Yes	PetrosiaVC	PF5	Bacteria	Proteobacteria	Alphaproteobacteria	Rhizobiales	Rhizobiaceae	Family: Rhizobiaceae	Family: Rhizobiaceae
15b503fbc207aecf4879f01321d81b7d	47	VcPf1N	Unhealthy	Grotta_Vico	VC	White_Cave_Dweller	Cave	Ambient	P.ficiformis	No	Yes	PetrosiaVC	PF5	Bacteria	Proteobacteria	Alphaproteobacteria	Parvibaculales	PS1_clade	PS1_clade	Genus: PS1_clade
2b6c99ff387c1fc2f2480aeac41dfe04	46	VcPf1N	Unhealthy	Grotta_Vico	VC	White_Cave_Dweller	Cave	Ambient	P.ficiformis	No	Yes	PetrosiaVC	PF5	Bacteria	Patescibacteria	Gracilibacteria	JGI_0000069-P22	JGI_0000069-P22	JGI_0000069-P22	Genus: JGI_0000069-P22
6db7dc208f8367313b961e22131022ca	46	VcPf1N	Unhealthy	Grotta_Vico	VC	White_Cave_Dweller	Cave	Ambient	P.ficiformis	No	Yes	PetrosiaVC	PF5	Bacteria	Patescibacteria	Gracilibacteria	JGI_0000069-P22	JGI_0000069-P22	JGI_0000069-P22	Genus: JGI_0000069-P22
5f5598e33f6efe16b5f1776d0f1557d7	46	VcPf1N	Unhealthy	Grotta_Vico	VC	White_Cave_Dweller	Cave	Ambient	P.ficiformis	No	Yes	PetrosiaVC	PF5	Bacteria	Verrucomicrobiota	Verrucomicrobiae	Verrucomicrobiales	Rubritaleaceae	Haloferula	Genus: Haloferula
6e2fb90406066f8c748a2b0c84bf66eb	45	VcPf1N	Unhealthy	Grotta_Vico	VC	White_Cave_Dweller	Cave	Ambient	P.ficiformis	No	Yes	PetrosiaVC	PF5	Bacteria	Chloroflexi	Anaerolineae	SBR1031	SBR1031	SBR1031	Genus: SBR1031
7353cd66384fd37575a153b0847ba709	45	VcPf1N	Unhealthy	Grotta_Vico	VC	White_Cave_Dweller	Cave	Ambient	P.ficiformis	No	Yes	PetrosiaVC	PF5	Bacteria	Proteobacteria	Alphaproteobacteria	Rhodospirillales	Terasakiellaceae	Family: Terasakiellaceae	Family: Terasakiellaceae
bb6f81f94dda18207725ea14132dd42e	44	VcPf1N	Unhealthy	Grotta_Vico	VC	White_Cave_Dweller	Cave	Ambient	P.ficiformis	No	Yes	PetrosiaVC	PF5	Bacteria	Bacteroidota	Bacteroidia	Flavobacteriales	Crocinitomicaceae	Crocinitomix	Genus: Crocinitomix
6b9c4fd3a0e9fb5a43cb67e959352c2f	44	VcPf1N	Unhealthy	Grotta_Vico	VC	White_Cave_Dweller	Cave	Ambient	P.ficiformis	No	Yes	PetrosiaVC	PF5	Bacteria	Bdellovibrionota	Bdellovibrionia	Bacteriovoracales	Bacteriovoracaceae	Peredibacter	Genus: Peredibacter
5645fb57183826acd3c597b2d1339874	44	VcPf1N	Unhealthy	Grotta_Vico	VC	White_Cave_Dweller	Cave	Ambient	P.ficiformis	No	Yes	PetrosiaVC	PF5	Bacteria	Planctomycetota	Phycisphaerae	Phycisphaerales	Phycisphaeraceae	Family: Phycisphaeraceae	Family: Phycisphaeraceae
97fd89e62586f94b409e80cef131346f	43	VcPf1N	Unhealthy	Grotta_Vico	VC	White_Cave_Dweller	Cave	Ambient	P.ficiformis	No	Yes	PetrosiaVC	PF5	Bacteria	Desulfobacterota	Desulfobacteria	Desulfobacterales	Desulfobacteraceae	Family: Desulfobacteraceae	Family: Desulfobacteraceae
fae5cd4c8af0d15b5fd21f4325650071	43	VcPf1N	Unhealthy	Grotta_Vico	VC	White_Cave_Dweller	Cave	Ambient	P.ficiformis	No	Yes	PetrosiaVC	PF5	Bacteria	Proteobacteria	Alphaproteobacteria	Rhizobiales	Rhizobiaceae	Cohaesibacter	Genus: Cohaesibacter
4180e8feaa48f6e7a3aaa4db7afe6a7f	42	VcPf1N	Unhealthy	Grotta_Vico	VC	White_Cave_Dweller	Cave	Ambient	P.ficiformis	No	Yes	PetrosiaVC	PF5	Bacteria	Planctomycetota	Phycisphaerae	Phycisphaerales	Phycisphaeraceae	SM1A02	Genus: SM1A02
7c816ad333917cdac8bdfa06b8a2f910	42	VcPf1N	Unhealthy	Grotta_Vico	VC	White_Cave_Dweller	Cave	Ambient	P.ficiformis	No	Yes	PetrosiaVC	PF5	Bacteria	Planctomycetota	OM190	OM190	OM190	OM190	Genus: OM190
52f9dbbd6c61cd1db42fde265d5a7ea3	41	VcPf1N	Unhealthy	Grotta_Vico	VC	White_Cave_Dweller	Cave	Ambient	P.ficiformis	No	Yes	PetrosiaVC	PF5	Bacteria	Cyanobacteria	Vampirivibrionia	Gastranaerophilales	Gastranaerophilales	Gastranaerophilales	Genus: Gastranaerophilales
166f2b3cdcbe3e8173ba6019b25d3c4f	41	VcPf1N	Unhealthy	Grotta_Vico	VC	White_Cave_Dweller	Cave	Ambient	P.ficiformis	No	Yes	PetrosiaVC	PF5	Bacteria	Proteobacteria	Alphaproteobacteria	Rhodobacterales	Rhodobacteraceae	Roseovarius	Genus: Roseovarius
9679462c139c7aff096ea17be1cc9c7b	41	VcPf1N	Unhealthy	Grotta_Vico	VC	White_Cave_Dweller	Cave	Ambient	P.ficiformis	No	Yes	PetrosiaVC	PF5	Bacteria	Proteobacteria	Alphaproteobacteria	Rhodobacterales	Rhodobacteraceae	Family: Rhodobacteraceae	Family: Rhodobacteraceae
91179552a56f41f26833393f306f8c35	40	VcPf1N	Unhealthy	Grotta_Vico	VC	White_Cave_Dweller	Cave	Ambient	P.ficiformis	No	Yes	PetrosiaVC	PF5	Bacteria	Bacteroidota	Kapabacteria	Kapabacteriales	Kapabacteriales	Kapabacteriales	Genus: Kapabacteriales
59cde200f09ccde2fa51cd02c466f5a6	39	VcPf1N	Unhealthy	Grotta_Vico	VC	White_Cave_Dweller	Cave	Ambient	P.ficiformis	No	Yes	PetrosiaVC	PF5	Bacteria	Acidobacteriota	Aminicenantia	Aminicenantales	Aminicenantales	Aminicenantales	Genus: Aminicenantales
618c873d380b9141fa47c86a7474755c	39	VcPf1N	Unhealthy	Grotta_Vico	VC	White_Cave_Dweller	Cave	Ambient	P.ficiformis	No	Yes	PetrosiaVC	PF5	Bacteria	Bacteroidota	Bacteroidia	Flavobacteriales	Flavobacteriaceae	Family: Flavobacteriaceae	Family: Flavobacteriaceae
c3ca44aff5646ea360ea8c79d7d2f633	39	VcPf1N	Unhealthy	Grotta_Vico	VC	White_Cave_Dweller	Cave	Ambient	P.ficiformis	No	Yes	PetrosiaVC	PF5	Bacteria	Firmicutes	Bacilli	Izemoplasmatales	Izemoplasmataceae	Izimaplasma	Genus: Izimaplasma
17f68e3fac6daf9b235482fff5c8771a	39	VcPf1N	Unhealthy	Grotta_Vico	VC	White_Cave_Dweller	Cave	Ambient	P.ficiformis	No	Yes	PetrosiaVC	PF5	Bacteria	Proteobacteria	Gammaproteobacteria	Pseudomonadales	Saccharospirillaceae	Saccharospirillaceae	Genus: Saccharospirillaceae
eeef1363940723a3d06d0b0ec6ffa475	39	VcPf1N	Unhealthy	Grotta_Vico	VC	White_Cave_Dweller	Cave	Ambient	P.ficiformis	No	Yes	PetrosiaVC	PF5	Bacteria	Proteobacteria	Alphaproteobacteria	Rhodospirillales	Order: Rhodospirillales	Order: Rhodospirillales	Order: Rhodospirillales
ddd8a1baef3a2a44b128f6e088cc27c4	38	VcPf1N	Unhealthy	Grotta_Vico	VC	White_Cave_Dweller	Cave	Ambient	P.ficiformis	No	Yes	PetrosiaVC	PF5	Bacteria	Actinobacteriota	Acidimicrobiia	Microtrichales	Microtrichaceae	Sva0996_group	Genus: Sva0996_group
3eacb51fa140952afc88c70e4fc4b4e8	38	VcPf1N	Unhealthy	Grotta_Vico	VC	White_Cave_Dweller	Cave	Ambient	P.ficiformis	No	Yes	PetrosiaVC	PF5	Bacteria	Bacteroidota	Bacteroidia	Bacteroidetes_VC2.1_Bac22	Bacteroidetes_VC2.1_Bac22	Bacteroidetes_VC2.1_Bac22	Genus: Bacteroidetes_VC2.1_Bac22
531d92d1e7fe45ca2e69c5093cb90ed5	37	VcPf1N	Unhealthy	Grotta_Vico	VC	White_Cave_Dweller	Cave	Ambient	P.ficiformis	No	Yes	PetrosiaVC	PF5	Bacteria	Planctomycetota	Planctomycetes	Pirellulales	Pirellulaceae	Pir4_lineage	Genus: Pir4_lineage
62846f3009095a68c41110699d86c159	37	VcPf1N	Unhealthy	Grotta_Vico	VC	White_Cave_Dweller	Cave	Ambient	P.ficiformis	No	Yes	PetrosiaVC	PF5	Bacteria	Planctomycetota	Phycisphaerae	Phycisphaerales	Phycisphaeraceae	Family: Phycisphaeraceae	Family: Phycisphaeraceae
c3c001190a492a9a39dc1f873793f975	37	VcPf1N	Unhealthy	Grotta_Vico	VC	White_Cave_Dweller	Cave	Ambient	P.ficiformis	No	Yes	PetrosiaVC	PF5	Bacteria	Proteobacteria	Gammaproteobacteria	Ga0077536	Ga0077536	Ga0077536	Genus: Ga0077536
06d703f8a2b11ae9c294c1a0cf202e94	36	VcPf1N	Unhealthy	Grotta_Vico	VC	White_Cave_Dweller	Cave	Ambient	P.ficiformis	No	Yes	PetrosiaVC	PF5	Bacteria	Actinobacteriota	Acidimicrobiia	Microtrichales	Microtrichaceae	Sva0996_group	Genus: Sva0996_group
725aef9dd9dc90393dc55e2ec3d0c079	36	VcPf1N	Unhealthy	Grotta_Vico	VC	White_Cave_Dweller	Cave	Ambient	P.ficiformis	No	Yes	PetrosiaVC	PF5	Bacteria	Bacteroidota	Bacteroidia	Flavobacteriales	Flavobacteriaceae	Flavobacteriaceae	Muricauda_sp.
e2352d6047e231b821bb1ff5fe17bbb3	36	VcPf1N	Unhealthy	Grotta_Vico	VC	White_Cave_Dweller	Cave	Ambient	P.ficiformis	No	Yes	PetrosiaVC	PF5	Bacteria	Bacteroidota	Bacteroidia	Bacteroidetes_VC2.1_Bac22	Bacteroidetes_VC2.1_Bac22	Bacteroidetes_VC2.1_Bac22	Genus: Bacteroidetes_VC2.1_Bac22
02ef0c3b98dec5d73971c09742dbc9ae	36	VcPf1N	Unhealthy	Grotta_Vico	VC	White_Cave_Dweller	Cave	Ambient	P.ficiformis	No	Yes	PetrosiaVC	PF5	Bacteria	Proteobacteria	Alphaproteobacteria	Class: Alphaproteobacteria	Class: Alphaproteobacteria	Class: Alphaproteobacteria	Class: Alphaproteobacteria
a3f73e0c74f76ad13ac6ec7e0271299b	35	VcPf1N	Unhealthy	Grotta_Vico	VC	White_Cave_Dweller	Cave	Ambient	P.ficiformis	No	Yes	PetrosiaVC	PF5	Bacteria	Firmicutes	Clostridia	Oscillospirales	Hungateiclostridiaceae	Ruminiclostridium	Genus: Ruminiclostridium
a41af5109aa03415f0623382579ec809	35	VcPf1N	Unhealthy	Grotta_Vico	VC	White_Cave_Dweller	Cave	Ambient	P.ficiformis	No	Yes	PetrosiaVC	PF5	Bacteria	Firmicutes	Clostridia	Clostridia_vadinBB60	Clostridia_vadinBB60	Clostridia_vadinBB60	Genus: Clostridia_vadinBB60
f76a447559e2a5aac80165a1cebe6137	35	VcPf1N	Unhealthy	Grotta_Vico	VC	White_Cave_Dweller	Cave	Ambient	P.ficiformis	No	Yes	PetrosiaVC	PF5	Bacteria	Proteobacteria	Alphaproteobacteria	Micavibrionales	Micavibrionaceae	Family: Micavibrionaceae	Family: Micavibrionaceae
647c872d37f38d47d286404cd0428a98	34	VcPf1N	Unhealthy	Grotta_Vico	VC	White_Cave_Dweller	Cave	Ambient	P.ficiformis	No	Yes	PetrosiaVC	PF5	Bacteria	Firmicutes	Clostridia	Lachnospirales	Defluviitaleaceae	Defluviitaleaceae_UCG-011	Genus: Defluviitaleaceae_UCG-011
4d7d5155d358724cd80f819504fc4278	34	VcPf1N	Unhealthy	Grotta_Vico	VC	White_Cave_Dweller	Cave	Ambient	P.ficiformis	No	Yes	PetrosiaVC	PF5	Bacteria	Planctomycetota	Planctomycetes	Planctomycetales	Gimesiaceae	Gimesia	Gimesia_maris
7622a7d91c7a48fdf5eb889fdfb4feb9	34	VcPf1N	Unhealthy	Grotta_Vico	VC	White_Cave_Dweller	Cave	Ambient	P.ficiformis	No	Yes	PetrosiaVC	PF5	Bacteria	Planctomycetota	Phycisphaerae	CCM11a	CCM11a	CCM11a	Genus: CCM11a
5b09048fa0a34e3c1508de3a5a9527b0	34	VcPf1N	Unhealthy	Grotta_Vico	VC	White_Cave_Dweller	Cave	Ambient	P.ficiformis	No	Yes	PetrosiaVC	PF5	Bacteria	Proteobacteria	Alphaproteobacteria	Rhizobiales	Stappiaceae	Labrenzia	Genus: Labrenzia
70ab0c542435925f2fc6ce0c13f72b1e	34	VcPf1N	Unhealthy	Grotta_Vico	VC	White_Cave_Dweller	Cave	Ambient	P.ficiformis	No	Yes	PetrosiaVC	PF5	Bacteria	Proteobacteria	Alphaproteobacteria	Class: Alphaproteobacteria	Class: Alphaproteobacteria	Class: Alphaproteobacteria	Class: Alphaproteobacteria
d25fd36567790cba843bfa044af8dc0b	34	VcPf1N	Unhealthy	Grotta_Vico	VC	White_Cave_Dweller	Cave	Ambient	P.ficiformis	No	Yes	PetrosiaVC	PF5	Bacteria	Proteobacteria	Alphaproteobacteria	Rickettsiales	SM2D12	SM2D12	Genus: SM2D12
c1de29b83786da9c1cf93ec9f574553f	33	VcPf1N	Unhealthy	Grotta_Vico	VC	White_Cave_Dweller	Cave	Ambient	P.ficiformis	No	Yes	PetrosiaVC	PF5	Bacteria	Planctomycetota	Phycisphaerae	Phycisphaerales	Phycisphaeraceae	SM1A02	Genus: SM1A02
0d6488136be652f3eb604a6d8928ba20	32	VcPf1N	Unhealthy	Grotta_Vico	VC	White_Cave_Dweller	Cave	Ambient	P.ficiformis	No	Yes	PetrosiaVC	PF5	Bacteria	Bacteroidota	Bacteroidia	Class: Bacteroidia	Class: Bacteroidia	Class: Bacteroidia	Class: Bacteroidia
0f3da5986f702a9e149352890dd4cfe4	32	VcPf1N	Unhealthy	Grotta_Vico	VC	White_Cave_Dweller	Cave	Ambient	P.ficiformis	No	Yes	PetrosiaVC	PF5	Bacteria	Patescibacteria	ABY1	Candidatus_Falkowbacteria	Candidatus_Falkowbacteria	Candidatus_Falkowbacteria	Genus: Candidatus_Falkowbacteria
f8e2cb98ba8d804cfdbe6525b8cd1b41	32	VcPf1N	Unhealthy	Grotta_Vico	VC	White_Cave_Dweller	Cave	Ambient	P.ficiformis	No	Yes	PetrosiaVC	PF5	Bacteria	Planctomycetota	Phycisphaerae	Phycisphaerales	Phycisphaeraceae	SM1A02	Genus: SM1A02
2816aca459236a68e767efb4fde783d7	32	VcPf1N	Unhealthy	Grotta_Vico	VC	White_Cave_Dweller	Cave	Ambient	P.ficiformis	No	Yes	PetrosiaVC	PF5	Bacteria	Proteobacteria	Gammaproteobacteria	Pseudomonadales	Saccharospirillaceae	Oleispira	Genus: Oleispira
6b15496ea296121a31345d0d4f24491b	31	VcPf1N	Unhealthy	Grotta_Vico	VC	White_Cave_Dweller	Cave	Ambient	P.ficiformis	No	Yes	PetrosiaVC	PF5	Bacteria	Desulfobacterota	Desulfobacteria	Desulfobacterales	Desulfobacteraceae	Desulfobacterium	Genus: Desulfobacterium
22edd128b148689ef496dce6e7b31171	31	VcPf1N	Unhealthy	Grotta_Vico	VC	White_Cave_Dweller	Cave	Ambient	P.ficiformis	No	Yes	PetrosiaVC	PF5	Bacteria	Patescibacteria	Saccharimonadia	Saccharimonadales	Saccharimonadales	Saccharimonadales	Genus: Saccharimonadales
3c074fbba51757da6f4fba851dcf1ec5	31	VcPf1N	Unhealthy	Grotta_Vico	VC	White_Cave_Dweller	Cave	Ambient	P.ficiformis	No	Yes	PetrosiaVC	PF5	Bacteria	Proteobacteria	Gammaproteobacteria	Nitrosococcales	Methylophagaceae	Methylotrophic_Group_3	Genus: Methylotrophic_Group_3
6ab1278e6d3276c1b26504067bd48865	31	VcPf1N	Unhealthy	Grotta_Vico	VC	White_Cave_Dweller	Cave	Ambient	P.ficiformis	No	Yes	PetrosiaVC	PF5	Bacteria	Proteobacteria	Alphaproteobacteria	Kordiimonadales	Order: Kordiimonadales	Order: Kordiimonadales	Order: Kordiimonadales
ec933333c74528b9eb2574a126705e30	30	VcPf1N	Unhealthy	Grotta_Vico	VC	White_Cave_Dweller	Cave	Ambient	P.ficiformis	No	Yes	PetrosiaVC	PF5	Bacteria	Bacteroidota	Bacteroidia	Bacteroidetes_VC2.1_Bac22	Bacteroidetes_VC2.1_Bac22	Bacteroidetes_VC2.1_Bac22	Genus: Bacteroidetes_VC2.1_Bac22
c8e3b4a14285163f4ab631808532205f	30	VcPf1N	Unhealthy	Grotta_Vico	VC	White_Cave_Dweller	Cave	Ambient	P.ficiformis	No	Yes	PetrosiaVC	PF5	Bacteria	Desulfobacterota	Desulfuromonadia	Bradymonadales	Bradymonadales	Bradymonadales	Genus: Bradymonadales
f7d1e1537ec2e8cd6fcd0c73583d9e5c	30	VcPf1N	Unhealthy	Grotta_Vico	VC	White_Cave_Dweller	Cave	Ambient	P.ficiformis	No	Yes	PetrosiaVC	PF5	Bacteria	Desulfobacterota	Desulfuromonadia	PB19	PB19	PB19	Genus: PB19
c9c39aeb5088594a6b12d58cd414b571	30	VcPf1N	Unhealthy	Grotta_Vico	VC	White_Cave_Dweller	Cave	Ambient	P.ficiformis	No	Yes	PetrosiaVC	PF5	Bacteria	Planctomycetota	Planctomycetes	Pirellulales	Pirellulaceae	Blastopirellula	Genus: Blastopirellula
e256839ef4ac035a87dc8941370674d8	30	VcPf1N	Unhealthy	Grotta_Vico	VC	White_Cave_Dweller	Cave	Ambient	P.ficiformis	No	Yes	PetrosiaVC	PF5	Bacteria	Planctomycetota	Planctomycetes	Pirellulales	Pirellulaceae	Rhodopirellula	planctomycete_DDSe3004
0f4350dc3d4e1cfb96088e7c4120ed7b	30	VcPf1N	Unhealthy	Grotta_Vico	VC	White_Cave_Dweller	Cave	Ambient	P.ficiformis	No	Yes	PetrosiaVC	PF5	Bacteria	Proteobacteria	Alphaproteobacteria	Parvibaculales	PS1_clade	PS1_clade	Genus: PS1_clade
ecd81c40f8c04cfcefaf0a81d9bdcaeb	29	VcPf1N	Unhealthy	Grotta_Vico	VC	White_Cave_Dweller	Cave	Ambient	P.ficiformis	No	Yes	PetrosiaVC	PF5	Bacteria	Bacteroidota	Bacteroidia	Flavobacteriales	Flavobacteriaceae	Aquibacter	Genus: Aquibacter
4cfef261b18bbf2edd988306c95a7589	29	VcPf1N	Unhealthy	Grotta_Vico	VC	White_Cave_Dweller	Cave	Ambient	P.ficiformis	No	Yes	PetrosiaVC	PF5	Bacteria	Proteobacteria	Alphaproteobacteria	Kordiimonadales	Order: Kordiimonadales	Order: Kordiimonadales	Order: Kordiimonadales
518c5b00c59592ef3790a6a9b245ea65	29	VcPf1N	Unhealthy	Grotta_Vico	VC	White_Cave_Dweller	Cave	Ambient	P.ficiformis	No	Yes	PetrosiaVC	PF5	Bacteria	Proteobacteria	Alphaproteobacteria	Rhodobacterales	Rhodobacteraceae	Family: Rhodobacteraceae	Family: Rhodobacteraceae
c2d73b0200f715bbbac468c1fb92af75	29	VcPf1N	Unhealthy	Grotta_Vico	VC	White_Cave_Dweller	Cave	Ambient	P.ficiformis	No	Yes	PetrosiaVC	PF5	Bacteria	Proteobacteria	Alphaproteobacteria	Rhodobacterales	Rhodobacteraceae	Family: Rhodobacteraceae	Family: Rhodobacteraceae
d030cbfed44bf5b997ca4e6e3cf85bcd	29	VcPf1N	Unhealthy	Grotta_Vico	VC	White_Cave_Dweller	Cave	Ambient	P.ficiformis	No	Yes	PetrosiaVC	PF5	Bacteria	Proteobacteria	Alphaproteobacteria	Rhodobacterales	Rhodobacteraceae	Roseovarius	Roseovarius_aestuarii
ffa0f12eea7fa0cc0d5b117a40cf0561	28	VcPf1N	Unhealthy	Grotta_Vico	VC	White_Cave_Dweller	Cave	Ambient	P.ficiformis	No	Yes	PetrosiaVC	PF5	Bacteria	Bacteroidota	Bacteroidia	Chitinophagales	Saprospiraceae	Phaeodactylibacter	Genus: Phaeodactylibacter
36b854caf98ea833315fe4f0c850b7ab	28	VcPf1N	Unhealthy	Grotta_Vico	VC	White_Cave_Dweller	Cave	Ambient	P.ficiformis	No	Yes	PetrosiaVC	PF5	Bacteria	Planctomycetota	Planctomycetes	Pirellulales	Pirellulaceae	Blastopirellula	Genus: Blastopirellula
3db7d007d32b6642f898ca01e5e257a3	28	VcPf1N	Unhealthy	Grotta_Vico	VC	White_Cave_Dweller	Cave	Ambient	P.ficiformis	No	Yes	PetrosiaVC	PF5	Bacteria	Planctomycetota	Phycisphaerae	MSBL9	SM23-30	SM23-30	Genus: SM23-30
672caf92a0d60c3244ae230c8fb69312	28	VcPf1N	Unhealthy	Grotta_Vico	VC	White_Cave_Dweller	Cave	Ambient	P.ficiformis	No	Yes	PetrosiaVC	PF5	Bacteria	Proteobacteria	Alphaproteobacteria	Parvibaculales	PS1_clade	PS1_clade	Genus: PS1_clade
99b762343357c977f8d110c75d13a21d	28	VcPf1N	Unhealthy	Grotta_Vico	VC	White_Cave_Dweller	Cave	Ambient	P.ficiformis	No	Yes	PetrosiaVC	PF5	Bacteria	Proteobacteria	Gammaproteobacteria	Pseudomonadales	Spongiibacteraceae	BD1-7_clade	Genus: BD1-7_clade
19d22459ec949b52fe9d64a21551109b	27	VcPf1N	Unhealthy	Grotta_Vico	VC	White_Cave_Dweller	Cave	Ambient	P.ficiformis	No	Yes	PetrosiaVC	PF5	Bacteria	Bacteroidota	Bacteroidia	Flavobacteriales	Flavobacteriaceae	Aquibacter	Genus: Aquibacter
1ec3d79a4ccd20b0d0e43f1eae1607f1	27	VcPf1N	Unhealthy	Grotta_Vico	VC	White_Cave_Dweller	Cave	Ambient	P.ficiformis	No	Yes	PetrosiaVC	PF5	Bacteria	Bacteroidota	Kapabacteria	Kapabacteriales	Kapabacteriales	Kapabacteriales	Genus: Kapabacteriales
be99b05b35d0d544fa2d9e829fe64894	27	VcPf1N	Unhealthy	Grotta_Vico	VC	White_Cave_Dweller	Cave	Ambient	P.ficiformis	No	Yes	PetrosiaVC	PF5	Bacteria	Bacteroidota	Bacteroidia	Flavobacteriales	Flavobacteriaceae	Flagellimonas	Genus: Flagellimonas
a9878de813822f9a5ad88e47fde09690	27	VcPf1N	Unhealthy	Grotta_Vico	VC	White_Cave_Dweller	Cave	Ambient	P.ficiformis	No	Yes	PetrosiaVC	PF5	Bacteria	Planctomycetota	Planctomycetes	Pirellulales	Pirellulaceae	Blastopirellula	planctomycete_MS1316
856edb433601f60fb45885923fe7354d	27	VcPf1N	Unhealthy	Grotta_Vico	VC	White_Cave_Dweller	Cave	Ambient	P.ficiformis	No	Yes	PetrosiaVC	PF5	Bacteria	Proteobacteria	Alphaproteobacteria	Micavibrionales	Micavibrionaceae	Family: Micavibrionaceae	Family: Micavibrionaceae
8a82712713440ed626dc3b2628065995	27	VcPf1N	Unhealthy	Grotta_Vico	VC	White_Cave_Dweller	Cave	Ambient	P.ficiformis	No	Yes	PetrosiaVC	PF5	Bacteria	Proteobacteria	Alphaproteobacteria	Rhodobacterales	Rhodobacteraceae	Family: Rhodobacteraceae	Family: Rhodobacteraceae
9b240c8571888a70d7c6370186e504e1	27	VcPf1N	Unhealthy	Grotta_Vico	VC	White_Cave_Dweller	Cave	Ambient	P.ficiformis	No	Yes	PetrosiaVC	PF5	Bacteria	Proteobacteria	Alphaproteobacteria	Rhizobiales	Methyloligellaceae	Family: Methyloligellaceae	Family: Methyloligellaceae
8a0201963915b4a42cad49d9dfaf72fb	27	VcPf1N	Unhealthy	Grotta_Vico	VC	White_Cave_Dweller	Cave	Ambient	P.ficiformis	No	Yes	PetrosiaVC	PF5	Bacteria	SAR324_clade(B)	SAR324_clade(B)	SAR324_clade(B)	SAR324_clade(B)	SAR324_clade(B)	Genus: SAR324_clade(B)
05b87221a0fd4431cfae03c7c99b1967	26	VcPf1N	Unhealthy	Grotta_Vico	VC	White_Cave_Dweller	Cave	Ambient	P.ficiformis	No	Yes	PetrosiaVC	PF5	Bacteria	Bacteroidota	Bacteroidia	Bacteroidales	Prolixibacteraceae	Draconibacterium	Genus: Draconibacterium
7e5a35efb3c3e3e17e0d028a1231abfc	26	VcPf1N	Unhealthy	Grotta_Vico	VC	White_Cave_Dweller	Cave	Ambient	P.ficiformis	No	Yes	PetrosiaVC	PF5	Bacteria	Firmicutes	Clostridia	Peptostreptococcales-Tissierellales	Peptostreptococcales-Tissierellales	Family: Peptostreptococcales-Tissierellales	Family: Peptostreptococcales-Tissierellales
0e36a8c6cf2470291a04285e7456b3c0	26	VcPf1N	Unhealthy	Grotta_Vico	VC	White_Cave_Dweller	Cave	Ambient	P.ficiformis	No	Yes	PetrosiaVC	PF5	Bacteria	Proteobacteria	Alphaproteobacteria	Rhodobacterales	Rhodobacteraceae	Family: Rhodobacteraceae	Family: Rhodobacteraceae
e022c15b5a999155b5a1b0641a4d038b	26	VcPf1N	Unhealthy	Grotta_Vico	VC	White_Cave_Dweller	Cave	Ambient	P.ficiformis	No	Yes	PetrosiaVC	PF5	Bacteria	Proteobacteria	Gammaproteobacteria	Gammaproteobacteria_Incertae_Sedis	Order: Gammaproteobacteria_Incertae_Sedis	Order: Gammaproteobacteria_Incertae_Sedis	Order: Gammaproteobacteria_Incertae_Sedis
3da44a23885e65f34b59d96578190e54	25	VcPf1N	Unhealthy	Grotta_Vico	VC	White_Cave_Dweller	Cave	Ambient	P.ficiformis	No	Yes	PetrosiaVC	PF5	Bacteria	Bacteroidota	Bacteroidia	Sphingobacteriales	NS11-12_group	NS11-12_group	Genus: NS11-12_group
528b1349e05a829f03d7f448199fcd8d	25	VcPf1N	Unhealthy	Grotta_Vico	VC	White_Cave_Dweller	Cave	Ambient	P.ficiformis	No	Yes	PetrosiaVC	PF5	Bacteria	Bdellovibrionota	Bdellovibrionia	Bdellovibrionales	Bdellovibrionaceae	Bdellovibrio	Genus: Bdellovibrio
2bae231ca1d7e4274dc92d7ed7106075	25	VcPf1N	Unhealthy	Grotta_Vico	VC	White_Cave_Dweller	Cave	Ambient	P.ficiformis	No	Yes	PetrosiaVC	PF5	Bacteria	Cyanobacteria	Vampirivibrionia	Caenarcaniphilales	Caenarcaniphilales	Caenarcaniphilales	Genus: Caenarcaniphilales
9bbbe63f9b1101b0a25246dc85ed52cb	25	VcPf1N	Unhealthy	Grotta_Vico	VC	White_Cave_Dweller	Cave	Ambient	P.ficiformis	No	Yes	PetrosiaVC	PF5	Bacteria	Cyanobacteria	Cyanobacteriia	Synechococcales	Cyanobiaceae	Synechococcus_CC9902	Genus: Synechococcus_CC9902
43b7f1c7a0689edad686b8e27187822f	25	VcPf1N	Unhealthy	Grotta_Vico	VC	White_Cave_Dweller	Cave	Ambient	P.ficiformis	No	Yes	PetrosiaVC	PF5	Bacteria	Desulfobacterota	Desulfobacteria	Desulfobacterales	Desulfobacteraceae	Desulfobacterium	Genus: Desulfobacterium
d14fdefdccff7843cc8b60473294a8da	25	VcPf1N	Unhealthy	Grotta_Vico	VC	White_Cave_Dweller	Cave	Ambient	P.ficiformis	No	Yes	PetrosiaVC	PF5	Bacteria	Planctomycetota	Planctomycetes	Pirellulales	Pirellulaceae	Rhodopirellula	planctomycete_str.
9f9205a6a5b3e13665ef54cbdfd2a417	25	VcPf1N	Unhealthy	Grotta_Vico	VC	White_Cave_Dweller	Cave	Ambient	P.ficiformis	No	Yes	PetrosiaVC	PF5	Bacteria	Proteobacteria	Alphaproteobacteria	Micavibrionales	Micavibrionaceae	Family: Micavibrionaceae	Family: Micavibrionaceae
a05ffcc25f0486b1cad54a50e1a6fb9c	25	VcPf1N	Unhealthy	Grotta_Vico	VC	White_Cave_Dweller	Cave	Ambient	P.ficiformis	No	Yes	PetrosiaVC	PF5	Bacteria	Proteobacteria	Alphaproteobacteria	Micavibrionales	Micavibrionaceae	Family: Micavibrionaceae	Family: Micavibrionaceae
0551832d82bf80d870af0ef59b950802	24	VcPf1N	Unhealthy	Grotta_Vico	VC	White_Cave_Dweller	Cave	Ambient	P.ficiformis	No	Yes	PetrosiaVC	PF5	Bacteria	Bacteroidota	Bacteroidia	Flavobacteriales	Flavobacteriaceae	Aquibacter	Genus: Aquibacter
4eb83fcf561846d1cf770f7696617687	24	VcPf1N	Unhealthy	Grotta_Vico	VC	White_Cave_Dweller	Cave	Ambient	P.ficiformis	No	Yes	PetrosiaVC	PF5	Bacteria	Bacteroidota	Bacteroidia	Flavobacteriales	Flavobacteriaceae	Aquibacter	Genus: Aquibacter
a1e59890b2117ca40670f2b0c9c21049	24	VcPf1N	Unhealthy	Grotta_Vico	VC	White_Cave_Dweller	Cave	Ambient	P.ficiformis	No	Yes	PetrosiaVC	PF5	Bacteria	Bdellovibrionota	Bdellovibrionia	Bacteriovoracales	Bacteriovoracaceae	Peredibacter	Genus: Peredibacter
57e0eda34fc3188db686ccc37bd08f0e	24	VcPf1N	Unhealthy	Grotta_Vico	VC	White_Cave_Dweller	Cave	Ambient	P.ficiformis	No	Yes	PetrosiaVC	PF5	Bacteria	Firmicutes	Clostridia	Lachnospirales	Lachnospiraceae	Family: Lachnospiraceae	Family: Lachnospiraceae
4b26a302339451e2b08e39c7c64cb045	24	VcPf1N	Unhealthy	Grotta_Vico	VC	White_Cave_Dweller	Cave	Ambient	P.ficiformis	No	Yes	PetrosiaVC	PF5	Bacteria	Planctomycetota	OM190	OM190	OM190	OM190	Genus: OM190
8eb3f191bcf903c22a7c5fee787da6d7	24	VcPf1N	Unhealthy	Grotta_Vico	VC	White_Cave_Dweller	Cave	Ambient	P.ficiformis	No	Yes	PetrosiaVC	PF5	Bacteria	Planctomycetota	Planctomycetes	Pirellulales	Pirellulaceae	Bythopirellula	Genus: Bythopirellula
a1e5c7d9fc8f3444a87c9ee9d7080f90	24	VcPf1N	Unhealthy	Grotta_Vico	VC	White_Cave_Dweller	Cave	Ambient	P.ficiformis	No	Yes	PetrosiaVC	PF5	Bacteria	Proteobacteria	Gammaproteobacteria	Steroidobacterales	Woeseiaceae	Woeseia	Genus: Woeseia
b29b3218410a973abebf3b935a541bb7	23	VcPf1N	Unhealthy	Grotta_Vico	VC	White_Cave_Dweller	Cave	Ambient	P.ficiformis	No	Yes	PetrosiaVC	PF5	Bacteria	Desulfobacterota	Desulfobacteria	Desulfobacterales	Desulfolunaceae	Family: Desulfolunaceae	Family: Desulfolunaceae
76ae01c8f39a5454bdf1fa7f8d12e9d0	23	VcPf1N	Unhealthy	Grotta_Vico	VC	White_Cave_Dweller	Cave	Ambient	P.ficiformis	No	Yes	PetrosiaVC	PF5	Bacteria	Firmicutes	Clostridia	Oscillospirales	Hungateiclostridiaceae	Family: Hungateiclostridiaceae	Family: Hungateiclostridiaceae
0043a41bc540b341ce58a7e9cf578671	23	VcPf1N	Unhealthy	Grotta_Vico	VC	White_Cave_Dweller	Cave	Ambient	P.ficiformis	No	Yes	PetrosiaVC	PF5	Bacteria	Planctomycetota	Phycisphaerae	Phycisphaerales	Phycisphaeraceae	SM1A02	Genus: SM1A02
5edfca963f0f1338086b0a8b060f32a5	23	VcPf1N	Unhealthy	Grotta_Vico	VC	White_Cave_Dweller	Cave	Ambient	P.ficiformis	No	Yes	PetrosiaVC	PF5	Bacteria	Planctomycetota	Planctomycetes	Planctomycetales	Rubinisphaeraceae	Fuerstia	Genus: Fuerstia
5f74e119cb8f0240b23bd20efe96a551	23	VcPf1N	Unhealthy	Grotta_Vico	VC	White_Cave_Dweller	Cave	Ambient	P.ficiformis	No	Yes	PetrosiaVC	PF5	Bacteria	Proteobacteria	Alphaproteobacteria	Rhodobacterales	Rhodobacteraceae	Family: Rhodobacteraceae	Family: Rhodobacteraceae
b30de7ac10ef37aea635a0b8e8f50eb8	23	VcPf1N	Unhealthy	Grotta_Vico	VC	White_Cave_Dweller	Cave	Ambient	P.ficiformis	No	Yes	PetrosiaVC	PF5	Bacteria	Proteobacteria	Magnetococcia	Magnetococcales	Magnetococcaceae	Magnetococcus	Genus: Magnetococcus
70599417a4e99b2a7a1c49996b8eccec	22	VcPf1N	Unhealthy	Grotta_Vico	VC	White_Cave_Dweller	Cave	Ambient	P.ficiformis	No	Yes	PetrosiaVC	PF5	Bacteria	Bacteroidota	Bacteroidia	Bacteroidales	Prolixibacteraceae	Roseimarinus	Prolixibacteraceae_bacterium
62ef5ee9c196af5e39dd5710e13d2bec	22	VcPf1N	Unhealthy	Grotta_Vico	VC	White_Cave_Dweller	Cave	Ambient	P.ficiformis	No	Yes	PetrosiaVC	PF5	Bacteria	Firmicutes	Clostridia	Oscillospirales	Hungateiclostridiaceae	Family: Hungateiclostridiaceae	Family: Hungateiclostridiaceae
0cee686a84f82a9b1dbd59bf4d25411b	22	VcPf1N	Unhealthy	Grotta_Vico	VC	White_Cave_Dweller	Cave	Ambient	P.ficiformis	No	Yes	PetrosiaVC	PF5	Bacteria	Proteobacteria	Alphaproteobacteria	Rhodospirillales	Order: Rhodospirillales	Order: Rhodospirillales	Order: Rhodospirillales
762c63c2523466e5c18168ed06a73211	22	VcPf1N	Unhealthy	Grotta_Vico	VC	White_Cave_Dweller	Cave	Ambient	P.ficiformis	No	Yes	PetrosiaVC	PF5	Bacteria	Proteobacteria	Alphaproteobacteria	Rhodobacterales	Rhodobacteraceae	Nautella	Genus: Nautella
bfc895a66c4026d585399c92c7522204	22	VcPf1N	Unhealthy	Grotta_Vico	VC	White_Cave_Dweller	Cave	Ambient	P.ficiformis	No	Yes	PetrosiaVC	PF5	Bacteria	SAR324_clade(B)	SAR324_clade(B)	SAR324_clade(B)	SAR324_clade(B)	SAR324_clade(B)	Genus: SAR324_clade(B)
c447cb759b8b9c704feb4da996f723c0	22	VcPf1N	Unhealthy	Grotta_Vico	VC	White_Cave_Dweller	Cave	Ambient	P.ficiformis	No	Yes	PetrosiaVC	PF5	Bacteria	Verrucomicrobiota	Lentisphaeria	P.palmC41	P.palmC41	P.palmC41	Genus: P.palmC41
145e57b9b85982385e46aba9d6c72e1a	21	VcPf1N	Unhealthy	Grotta_Vico	VC	White_Cave_Dweller	Cave	Ambient	P.ficiformis	No	Yes	PetrosiaVC	PF5	Bacteria	Bacteroidota	Bacteroidia	Flavobacteriales	Cryomorphaceae	Family: Cryomorphaceae	Family: Cryomorphaceae
c7ebcc517ff1ce2a01f7085aa3c49aab	21	VcPf1N	Unhealthy	Grotta_Vico	VC	White_Cave_Dweller	Cave	Ambient	P.ficiformis	No	Yes	PetrosiaVC	PF5	Bacteria	Bdellovibrionota	Bdellovibrionia	Bacteriovoracales	Bacteriovoracaceae	Peredibacter	Genus: Peredibacter
fbba6c7f68c2e0be2c6071ba8527eb9f	21	VcPf1N	Unhealthy	Grotta_Vico	VC	White_Cave_Dweller	Cave	Ambient	P.ficiformis	No	Yes	PetrosiaVC	PF5	Bacteria	Bdellovibrionota	Bdellovibrionia	Bdellovibrionales	Bdellovibrionaceae	OM27_clade	Genus: OM27_clade
b174d12d28d2e34cb84dbe04c58adcaf	21	VcPf1N	Unhealthy	Grotta_Vico	VC	White_Cave_Dweller	Cave	Ambient	P.ficiformis	No	Yes	PetrosiaVC	PF5	Bacteria	Desulfobacterota	Desulfovibrionia	Desulfovibrionales	Desulfovibrionaceae	Desulfovibrio	Genus: Desulfovibrio
7bdf9fc6519122fb18ce1f0d0899071b	21	VcPf1N	Unhealthy	Grotta_Vico	VC	White_Cave_Dweller	Cave	Ambient	P.ficiformis	No	Yes	PetrosiaVC	PF5	Bacteria	Planctomycetota	Phycisphaerae	CCM11a	CCM11a	CCM11a	Genus: CCM11a
babe0ac5d14c053075512455a9fc512e	21	VcPf1N	Unhealthy	Grotta_Vico	VC	White_Cave_Dweller	Cave	Ambient	P.ficiformis	No	Yes	PetrosiaVC	PF5	Bacteria	Planctomycetota	Planctomycetes	Pirellulales	Pirellulaceae	Rhodopirellula	Genus: Rhodopirellula
26e8f4a3c2849d4ae1f0f238f545b87b	21	VcPf1N	Unhealthy	Grotta_Vico	VC	White_Cave_Dweller	Cave	Ambient	P.ficiformis	No	Yes	PetrosiaVC	PF5	Bacteria	Proteobacteria	Alphaproteobacteria	Rhodobacterales	Rhodobacteraceae	Ruegeria	Genus: Ruegeria
f507e0a4bd93f84d487f461b42ac0426	21	VcPf1N	Unhealthy	Grotta_Vico	VC	White_Cave_Dweller	Cave	Ambient	P.ficiformis	No	Yes	PetrosiaVC	PF5	Bacteria	Proteobacteria	Gammaproteobacteria	Pseudomonadales	Oleiphilaceae	Oleiphilus	Genus: Oleiphilus
e0c82ba325ff625e56ad118078704bc2	20	VcPf1N	Unhealthy	Grotta_Vico	VC	White_Cave_Dweller	Cave	Ambient	P.ficiformis	No	Yes	PetrosiaVC	PF5	Bacteria	Bdellovibrionota	Oligoflexia	0319-6G20	0319-6G20	0319-6G20	Genus: 0319-6G20
8ad9a0fb4f6ba34822004a3378c732cf	20	VcPf1N	Unhealthy	Grotta_Vico	VC	White_Cave_Dweller	Cave	Ambient	P.ficiformis	No	Yes	PetrosiaVC	PF5	Bacteria	Proteobacteria	Alphaproteobacteria	Kordiimonadales	Order: Kordiimonadales	Order: Kordiimonadales	Order: Kordiimonadales
c3408c92c74ee0bfacabc05e7cc590b4	20	VcPf1N	Unhealthy	Grotta_Vico	VC	White_Cave_Dweller	Cave	Ambient	P.ficiformis	No	Yes	PetrosiaVC	PF5	Bacteria	Proteobacteria	Alphaproteobacteria	Thalassobaculales	Order: Thalassobaculales	Order: Thalassobaculales	Order: Thalassobaculales
4b92e13ce3d7f055bc6eae3ec417921b	20	VcPf1N	Unhealthy	Grotta_Vico	VC	White_Cave_Dweller	Cave	Ambient	P.ficiformis	No	Yes	PetrosiaVC	PF5	Bacteria	WPS-2	WPS-2	WPS-2	WPS-2	WPS-2	Genus: WPS-2
54a585c57c9c384e41968c1f45460b99	19	VcPf1N	Unhealthy	Grotta_Vico	VC	White_Cave_Dweller	Cave	Ambient	P.ficiformis	No	Yes	PetrosiaVC	PF5	Bacteria	Bacteroidota	Bacteroidia	Sphingobacteriales	NS11-12_group	NS11-12_group	Genus: NS11-12_group
75e344d30899b8b159c5fd5b95def41b	19	VcPf1N	Unhealthy	Grotta_Vico	VC	White_Cave_Dweller	Cave	Ambient	P.ficiformis	No	Yes	PetrosiaVC	PF5	Bacteria	Firmicutes	Clostridia	Class: Clostridia	Class: Clostridia	Class: Clostridia	Class: Clostridia
9e6f9855d0ff81365ae74d4d112b1c06	19	VcPf1N	Unhealthy	Grotta_Vico	VC	White_Cave_Dweller	Cave	Ambient	P.ficiformis	No	Yes	PetrosiaVC	PF5	Bacteria	Planctomycetota	Planctomycetes	Pirellulales	Pirellulaceae	Pirellula	Genus: Pirellula
bd6de35d07f659b7ddcb4d872a223114	19	VcPf1N	Unhealthy	Grotta_Vico	VC	White_Cave_Dweller	Cave	Ambient	P.ficiformis	No	Yes	PetrosiaVC	PF5	Bacteria	Planctomycetota	Planctomycetes	Pirellulales	Pirellulaceae	Rhodopirellula	Genus: Rhodopirellula
53c5e014f63a1fc82fe66bbf2ac0d73c	19	VcPf1N	Unhealthy	Grotta_Vico	VC	White_Cave_Dweller	Cave	Ambient	P.ficiformis	No	Yes	PetrosiaVC	PF5	Bacteria	Proteobacteria	Gammaproteobacteria	Enterobacterales	Vibrionaceae	Vibrio	bacterium_4H201
7cabe31a829495d589f9d773d0e88946	19	VcPf1N	Unhealthy	Grotta_Vico	VC	White_Cave_Dweller	Cave	Ambient	P.ficiformis	No	Yes	PetrosiaVC	PF5	Bacteria	Proteobacteria	Alphaproteobacteria	Caulobacterales	Hyphomonadaceae	Family: Hyphomonadaceae	Family: Hyphomonadaceae
9d44c4f985174bbf53726528724b89e2	19	VcPf1N	Unhealthy	Grotta_Vico	VC	White_Cave_Dweller	Cave	Ambient	P.ficiformis	No	Yes	PetrosiaVC	PF5	Bacteria	Proteobacteria	Gammaproteobacteria	Thiomicrospirales	Thiomicrospiraceae	Family: Thiomicrospiraceae	Family: Thiomicrospiraceae
a2b234146f1cbc83eefa340fd87e286a	19	VcPf1N	Unhealthy	Grotta_Vico	VC	White_Cave_Dweller	Cave	Ambient	P.ficiformis	No	Yes	PetrosiaVC	PF5	Bacteria	Proteobacteria	Alphaproteobacteria	Caulobacterales	Hyphomonadaceae	Family: Hyphomonadaceae	Family: Hyphomonadaceae
eccad6e4b63dccb4feecc5857395b518	19	VcPf1N	Unhealthy	Grotta_Vico	VC	White_Cave_Dweller	Cave	Ambient	P.ficiformis	No	Yes	PetrosiaVC	PF5	Bacteria	Proteobacteria	Gammaproteobacteria	Pseudomonadales	Spongiibacteraceae	Family: Spongiibacteraceae	Family: Spongiibacteraceae
ffd3768568adb1a0bd741405c7c1b89c	19	VcPf1N	Unhealthy	Grotta_Vico	VC	White_Cave_Dweller	Cave	Ambient	P.ficiformis	No	Yes	PetrosiaVC	PF5	Bacteria	Proteobacteria	Alphaproteobacteria	Rickettsiales	SM2D12	SM2D12	Genus: SM2D12
ed78f6e62255aa0bb982292d89082bd7	18	VcPf1N	Unhealthy	Grotta_Vico	VC	White_Cave_Dweller	Cave	Ambient	P.ficiformis	No	Yes	PetrosiaVC	PF5	Bacteria	Armatimonadota	Fimbriimonadia	Fimbriimonadales	Fimbriimonadaceae	Fimbriimonadaceae	Genus: Fimbriimonadaceae
3da3e43a7ff98f7f7940b6f8dac24838	18	VcPf1N	Unhealthy	Grotta_Vico	VC	White_Cave_Dweller	Cave	Ambient	P.ficiformis	No	Yes	PetrosiaVC	PF5	Bacteria	Bdellovibrionota	Bdellovibrionia	Bdellovibrionales	Bdellovibrionaceae	Bdellovibrio	Genus: Bdellovibrio
9a32a82d1ebef7e7f9ac9054a33469d9	18	VcPf1N	Unhealthy	Grotta_Vico	VC	White_Cave_Dweller	Cave	Ambient	P.ficiformis	No	Yes	PetrosiaVC	PF5	Bacteria	Bdellovibrionota	Oligoflexia	0319-6G20	0319-6G20	0319-6G20	Genus: 0319-6G20
dcb122aee35ac9d4b05af332eb108019	18	VcPf1N	Unhealthy	Grotta_Vico	VC	White_Cave_Dweller	Cave	Ambient	P.ficiformis	No	Yes	PetrosiaVC	PF5	Bacteria	Cyanobacteria	Vampirivibrionia	Gastranaerophilales	Gastranaerophilales	Gastranaerophilales	Genus: Gastranaerophilales
89f3be31b5e9d79f330d4c235e99cc5f	18	VcPf1N	Unhealthy	Grotta_Vico	VC	White_Cave_Dweller	Cave	Ambient	P.ficiformis	No	Yes	PetrosiaVC	PF5	Bacteria	Desulfobacterota	Desulfobacteria	Desulfobacterales	Desulfobacteraceae	Desulfobacter	Genus: Desulfobacter
a6141154309990e50d34441474eca1de	18	VcPf1N	Unhealthy	Grotta_Vico	VC	White_Cave_Dweller	Cave	Ambient	P.ficiformis	No	Yes	PetrosiaVC	PF5	Bacteria	Desulfobacterota	Desulfobacteria	Desulfobacterales	Order: Desulfobacterales	Order: Desulfobacterales	Order: Desulfobacterales
43d41036115c24b7f70f1c0ff1619d91	18	VcPf1N	Unhealthy	Grotta_Vico	VC	White_Cave_Dweller	Cave	Ambient	P.ficiformis	No	Yes	PetrosiaVC	PF5	Bacteria	Patescibacteria	ABY1	Candidatus_Kerfeldbacteria	Candidatus_Kerfeldbacteria	Candidatus_Kerfeldbacteria	Genus: Candidatus_Kerfeldbacteria
f7aecbfe4b9c7a13a63bef691710c2e7	18	VcPf1N	Unhealthy	Grotta_Vico	VC	White_Cave_Dweller	Cave	Ambient	P.ficiformis	No	Yes	PetrosiaVC	PF5	Bacteria	Patescibacteria	ABY1	Candidatus_Kuenenbacteria	Candidatus_Kuenenbacteria	Candidatus_Kuenenbacteria	Genus: Candidatus_Kuenenbacteria
e30d9341f2c5beb7187f33f16847ed64	18	VcPf1N	Unhealthy	Grotta_Vico	VC	White_Cave_Dweller	Cave	Ambient	P.ficiformis	No	Yes	PetrosiaVC	PF5	Bacteria	Planctomycetota	Planctomycetes	Planctomycetales	Order: Planctomycetales	Order: Planctomycetales	Order: Planctomycetales
14ffff1b4a64bfa25ef3194d0a9092cc	18	VcPf1N	Unhealthy	Grotta_Vico	VC	White_Cave_Dweller	Cave	Ambient	P.ficiformis	No	Yes	PetrosiaVC	PF5	Bacteria	Proteobacteria	Alphaproteobacteria	Micavibrionales	Micavibrionaceae	Family: Micavibrionaceae	Family: Micavibrionaceae
5efabdabda08fadd1c5ac5f4893022fd	18	VcPf1N	Unhealthy	Grotta_Vico	VC	White_Cave_Dweller	Cave	Ambient	P.ficiformis	No	Yes	PetrosiaVC	PF5	Bacteria	Proteobacteria	Alphaproteobacteria	Rhodobacterales	Rhodobacteraceae	Family: Rhodobacteraceae	Family: Rhodobacteraceae
7af78fc13945e1edbd26735554b032c0	18	VcPf1N	Unhealthy	Grotta_Vico	VC	White_Cave_Dweller	Cave	Ambient	P.ficiformis	No	Yes	PetrosiaVC	PF5	Bacteria	Proteobacteria	Alphaproteobacteria	Caulobacterales	Parvularculaceae	Parvularcula	Genus: Parvularcula
8ac6cb70d12413ea809e436afea388bb	18	VcPf1N	Unhealthy	Grotta_Vico	VC	White_Cave_Dweller	Cave	Ambient	P.ficiformis	No	Yes	PetrosiaVC	PF5	Bacteria	Proteobacteria	Alphaproteobacteria	Micavibrionales	Order: Micavibrionales	Order: Micavibrionales	Order: Micavibrionales
7602292af2bd83e7fe28fa04052d3d47	18	VcPf1N	Unhealthy	Grotta_Vico	VC	White_Cave_Dweller	Cave	Ambient	P.ficiformis	No	Yes	PetrosiaVC	PF5	Bacteria	Verrucomicrobiota	Lentisphaeria	Victivallales	PRD18C08	PRD18C08	Genus: PRD18C08
01b0f91490bfd48b49476f671bcc2f94	17	VcPf1N	Unhealthy	Grotta_Vico	VC	White_Cave_Dweller	Cave	Ambient	P.ficiformis	No	Yes	PetrosiaVC	PF5	Bacteria	Firmicutes	Clostridia	Clostridia_vadinBB60	Clostridia_vadinBB60	Clostridia_vadinBB60	Genus: Clostridia_vadinBB60
45492c1db1dc8f7e53c912c304a7fe1c	17	VcPf1N	Unhealthy	Grotta_Vico	VC	White_Cave_Dweller	Cave	Ambient	P.ficiformis	No	Yes	PetrosiaVC	PF5	Bacteria	Firmicutes	Clostridia	Christensenellales	Christensenellaceae	Christensenellaceae_R-7	Genus: Christensenellaceae_R-7
68cadf89592579c921e7cb81cfca40e5	17	VcPf1N	Unhealthy	Grotta_Vico	VC	White_Cave_Dweller	Cave	Ambient	P.ficiformis	No	Yes	PetrosiaVC	PF5	Bacteria	Firmicutes	Clostridia	Oscillospirales	Hungateiclostridiaceae	Ruminiclostridium	Genus: Ruminiclostridium
2e631c3bd036194719befb0484811861	17	VcPf1N	Unhealthy	Grotta_Vico	VC	White_Cave_Dweller	Cave	Ambient	P.ficiformis	No	Yes	PetrosiaVC	PF5	Bacteria	Planctomycetota	Planctomycetes	Pirellulales	Pirellulaceae	Blastopirellula	Genus: Blastopirellula
9f9203bcdc74bb3036a09b14598cacf5	17	VcPf1N	Unhealthy	Grotta_Vico	VC	White_Cave_Dweller	Cave	Ambient	P.ficiformis	No	Yes	PetrosiaVC	PF5	Bacteria	Planctomycetota	Phycisphaerae	Phycisphaerales	Phycisphaeraceae	Urania-1B-19_sediment	Genus: Urania-1B-19_sediment
c5c1bcbd17cbaddc6ef93b657dec4703	17	VcPf1N	Unhealthy	Grotta_Vico	VC	White_Cave_Dweller	Cave	Ambient	P.ficiformis	No	Yes	PetrosiaVC	PF5	Bacteria	Planctomycetota	Phycisphaerae	Phycisphaerales	Phycisphaeraceae	SM1A02	Genus: SM1A02
dd9b3883ec66d5181421f31e3ce7b882	17	VcPf1N	Unhealthy	Grotta_Vico	VC	White_Cave_Dweller	Cave	Ambient	P.ficiformis	No	Yes	PetrosiaVC	PF5	Bacteria	Planctomycetota	Phycisphaerae	Phycisphaerales	Phycisphaeraceae	SM1A02	Genus: SM1A02
f3e35eda5e9cfe136e1c84e685e428a9	17	VcPf1N	Unhealthy	Grotta_Vico	VC	White_Cave_Dweller	Cave	Ambient	P.ficiformis	No	Yes	PetrosiaVC	PF5	Bacteria	Planctomycetota	Planctomycetes	Planctomycetales	Order: Planctomycetales	Order: Planctomycetales	Order: Planctomycetales
f53c36c9883ec97b0fcebe727df8b8cb	17	VcPf1N	Unhealthy	Grotta_Vico	VC	White_Cave_Dweller	Cave	Ambient	P.ficiformis	No	Yes	PetrosiaVC	PF5	Bacteria	Planctomycetota	Planctomycetes	Pirellulales	Pirellulaceae	Family: Pirellulaceae	Family: Pirellulaceae
0bdc57d4e353d9a230b9e95e8834d9d6	17	VcPf1N	Unhealthy	Grotta_Vico	VC	White_Cave_Dweller	Cave	Ambient	P.ficiformis	No	Yes	PetrosiaVC	PF5	Bacteria	Proteobacteria	Alphaproteobacteria	Kordiimonadales	Order: Kordiimonadales	Order: Kordiimonadales	Order: Kordiimonadales
87d17288b3369efa446d862891e3d6cc	17	VcPf1N	Unhealthy	Grotta_Vico	VC	White_Cave_Dweller	Cave	Ambient	P.ficiformis	No	Yes	PetrosiaVC	PF5	Bacteria	Proteobacteria	Alphaproteobacteria	Rhodobacterales	Rhodobacteraceae	Family: Rhodobacteraceae	Family: Rhodobacteraceae
f09d2e538ac84a51b40c5640cdd42eda	17	VcPf1N	Unhealthy	Grotta_Vico	VC	White_Cave_Dweller	Cave	Ambient	P.ficiformis	No	Yes	PetrosiaVC	PF5	Bacteria	Proteobacteria	Alphaproteobacteria	Sphingomonadales	Sphingomonadaceae	Family: Sphingomonadaceae	Family: Sphingomonadaceae
a24353578489479a543b77fb83190a80	16	VcPf1N	Unhealthy	Grotta_Vico	VC	White_Cave_Dweller	Cave	Ambient	P.ficiformis	No	Yes	PetrosiaVC	PF5	Bacteria	Actinobacteriota	Acidimicrobiia	Actinomarinales	Order: Actinomarinales	Order: Actinomarinales	Order: Actinomarinales
754b0d9ab8de27bbe18f416795960201	16	VcPf1N	Unhealthy	Grotta_Vico	VC	White_Cave_Dweller	Cave	Ambient	P.ficiformis	No	Yes	PetrosiaVC	PF5	Bacteria	Bacteroidota	Bacteroidia	Flavobacteriales	Crocinitomicaceae	Fluviicola	Genus: Fluviicola
ff4d80ad91520ee693bf493eae2d3680	16	VcPf1N	Unhealthy	Grotta_Vico	VC	White_Cave_Dweller	Cave	Ambient	P.ficiformis	No	Yes	PetrosiaVC	PF5	Bacteria	Bacteroidota	Bacteroidia	Cytophagales	Cyclobacteriaceae	Family: Cyclobacteriaceae	Family: Cyclobacteriaceae
35f66a36646ee260174f7acfb29d6aaa	16	VcPf1N	Unhealthy	Grotta_Vico	VC	White_Cave_Dweller	Cave	Ambient	P.ficiformis	No	Yes	PetrosiaVC	PF5	Bacteria	Bdellovibrionota	Bdellovibrionia	Bacteriovoracales	Bacteriovoracaceae	Family: Bacteriovoracaceae	Family: Bacteriovoracaceae
e4e21d30fa24b806e597773a0122beca	16	VcPf1N	Unhealthy	Grotta_Vico	VC	White_Cave_Dweller	Cave	Ambient	P.ficiformis	No	Yes	PetrosiaVC	PF5	Bacteria	Chloroflexi	Anaerolineae	SBR1031	SBR1031	SBR1031	Genus: SBR1031
b96b1e589e704b6a643f86890117cfa7	16	VcPf1N	Unhealthy	Grotta_Vico	VC	White_Cave_Dweller	Cave	Ambient	P.ficiformis	No	Yes	PetrosiaVC	PF5	Bacteria	Nitrospirota	Nitrospiria	Nitrospirales	Nitrospiraceae	Nitrospira	Genus: Nitrospira
8fae353b71719d6b3ae47ef22ad91a67	16	VcPf1N	Unhealthy	Grotta_Vico	VC	White_Cave_Dweller	Cave	Ambient	P.ficiformis	No	Yes	PetrosiaVC	PF5	Bacteria	Patescibacteria	ABY1	Candidatus_Kerfeldbacteria	Candidatus_Kerfeldbacteria	Candidatus_Kerfeldbacteria	Genus: Candidatus_Kerfeldbacteria
2492c266301222d74f26a7bfcc5cf70c	16	VcPf1N	Unhealthy	Grotta_Vico	VC	White_Cave_Dweller	Cave	Ambient	P.ficiformis	No	Yes	PetrosiaVC	PF5	Bacteria	Planctomycetota	Planctomycetes	Pirellulales	Pirellulaceae	Pir4_lineage	Genus: Pir4_lineage
8c917a6bb37731372cc6a62051852e10	16	VcPf1N	Unhealthy	Grotta_Vico	VC	White_Cave_Dweller	Cave	Ambient	P.ficiformis	No	Yes	PetrosiaVC	PF5	Bacteria	Planctomycetota	Planctomycetes	Pirellulales	Pirellulaceae	Blastopirellula	Genus: Blastopirellula
ca19f8162a39d72f5ff968deef103981	16	VcPf1N	Unhealthy	Grotta_Vico	VC	White_Cave_Dweller	Cave	Ambient	P.ficiformis	No	Yes	PetrosiaVC	PF5	Bacteria	Planctomycetota	OM190	OM190	OM190	OM190	Genus: OM190
6cf2235f2c39e406d6a4356b6873eb14	16	VcPf1N	Unhealthy	Grotta_Vico	VC	White_Cave_Dweller	Cave	Ambient	P.ficiformis	No	Yes	PetrosiaVC	PF5	Bacteria	Proteobacteria	Gammaproteobacteria	Pseudomonadales	Spongiibacteraceae	BD1-7_clade	Genus: BD1-7_clade
82d0dea7f857135a9b3540cee87b2981	16	VcPf1N	Unhealthy	Grotta_Vico	VC	White_Cave_Dweller	Cave	Ambient	P.ficiformis	No	Yes	PetrosiaVC	PF5	Bacteria	Proteobacteria	Gammaproteobacteria	Enterobacterales	Vibrionaceae	Vibrio	Genus: Vibrio
f08831d3c0d74e73fc80a190e22d1c09	16	VcPf1N	Unhealthy	Grotta_Vico	VC	White_Cave_Dweller	Cave	Ambient	P.ficiformis	No	Yes	PetrosiaVC	PF5	Bacteria	Proteobacteria	Alphaproteobacteria	Rhodospirillales	Terasakiellaceae	Terasakiella	Genus: Terasakiella
248f7ccffc90080522bd9ba4f2613a58	16	VcPf1N	Unhealthy	Grotta_Vico	VC	White_Cave_Dweller	Cave	Ambient	P.ficiformis	No	Yes	PetrosiaVC	PF5	Bacteria	Verrucomicrobiota	Verrucomicrobiae	Opitutales	Opitutaceae	Diplosphaera	Genus: Diplosphaera
c8831455d91b849221bcf231938cedb0	15	VcPf1N	Unhealthy	Grotta_Vico	VC	White_Cave_Dweller	Cave	Ambient	P.ficiformis	No	Yes	PetrosiaVC	PF5	Bacteria	Bacteroidota	Kapabacteria	Kapabacteriales	Kapabacteriales	Kapabacteriales	Genus: Kapabacteriales
473ddd49be6dc0a06cce54cba5b3179c	15	VcPf1N	Unhealthy	Grotta_Vico	VC	White_Cave_Dweller	Cave	Ambient	P.ficiformis	No	Yes	PetrosiaVC	PF5	Archaea	Nanoarchaeota	Nanoarchaeia	Woesearchaeales	SCGC_AAA011-D5	SCGC_AAA011-D5	Candidatus_Diapherotrites
9dc6b4b37a21c31fa6128fd0f6401a96	15	VcPf1N	Unhealthy	Grotta_Vico	VC	White_Cave_Dweller	Cave	Ambient	P.ficiformis	No	Yes	PetrosiaVC	PF5	Bacteria	Planctomycetota	Planctomycetes	Pirellulales	Pirellulaceae	Rubripirellula	Genus: Rubripirellula
10a43a8a3ab55f067b8b093aa9603af1	15	VcPf1N	Unhealthy	Grotta_Vico	VC	White_Cave_Dweller	Cave	Ambient	P.ficiformis	No	Yes	PetrosiaVC	PF5	Bacteria	Proteobacteria	Gammaproteobacteria	Thiotrichales	Thiotrichaceae	Thiotrichaceae	Genus: Thiotrichaceae
3d31df2dba1f8ab12fabf62a857c0c40	15	VcPf1N	Unhealthy	Grotta_Vico	VC	White_Cave_Dweller	Cave	Ambient	P.ficiformis	No	Yes	PetrosiaVC	PF5	Bacteria	Proteobacteria	Alphaproteobacteria	Micavibrionales	Micavibrionaceae	Family: Micavibrionaceae	Family: Micavibrionaceae
93851247298e97ceb9e9ee6a5ea5b11d	15	VcPf1N	Unhealthy	Grotta_Vico	VC	White_Cave_Dweller	Cave	Ambient	P.ficiformis	No	Yes	PetrosiaVC	PF5	Bacteria	Proteobacteria	Gammaproteobacteria	Pseudomonadales	Cellvibrionaceae	Family: Cellvibrionaceae	Family: Cellvibrionaceae
ef01959d774bb43d69df31d17e6ba823	15	VcPf1N	Unhealthy	Grotta_Vico	VC	White_Cave_Dweller	Cave	Ambient	P.ficiformis	No	Yes	PetrosiaVC	PF5	Bacteria	Proteobacteria	Alphaproteobacteria	Rhizobiales	Rhizobiaceae	Cohaesibacter	Genus: Cohaesibacter
318c3c6a14aed9d629284ae6c933bc18	14	VcPf1N	Unhealthy	Grotta_Vico	VC	White_Cave_Dweller	Cave	Ambient	P.ficiformis	No	Yes	PetrosiaVC	PF5	Bacteria	Actinobacteriota	Acidimicrobiia	Microtrichales	Microtrichaceae	Sva0996_group	Genus: Sva0996_group
002464932eeba1a3b9ec9c8d0d0dbc49	14	VcPf1N	Unhealthy	Grotta_Vico	VC	White_Cave_Dweller	Cave	Ambient	P.ficiformis	No	Yes	PetrosiaVC	PF5	Bacteria	Bacteroidota	Bacteroidia	Bacteroidales	Marinilabiliaceae	Family: Marinilabiliaceae	Family: Marinilabiliaceae
4cb3fa6cdfb9513c42652c8d634070fa	14	VcPf1N	Unhealthy	Grotta_Vico	VC	White_Cave_Dweller	Cave	Ambient	P.ficiformis	No	Yes	PetrosiaVC	PF5	Bacteria	Bacteroidota	Bacteroidia	Flavobacteriales	Crocinitomicaceae	Crocinitomix	Genus: Crocinitomix
fc29160cbbcb0910037a36bc6125a7da	14	VcPf1N	Unhealthy	Grotta_Vico	VC	White_Cave_Dweller	Cave	Ambient	P.ficiformis	No	Yes	PetrosiaVC	PF5	Bacteria	Bacteroidota	Bacteroidia	Bacteroidales	Marinilabiliaceae	Carboxylicivirga	Genus: Carboxylicivirga
3e7d5af572b1f9991a896d9c898ec72e	14	VcPf1N	Unhealthy	Grotta_Vico	VC	White_Cave_Dweller	Cave	Ambient	P.ficiformis	No	Yes	PetrosiaVC	PF5	Bacteria	Bdellovibrionota	Bdellovibrionia	Bdellovibrionales	Bdellovibrionaceae	OM27_clade	Genus: OM27_clade
b177b0dbd45f09e60ab9d31c29ec3dc3	14	VcPf1N	Unhealthy	Grotta_Vico	VC	White_Cave_Dweller	Cave	Ambient	P.ficiformis	No	Yes	PetrosiaVC	PF5	Bacteria	Campylobacterota	Campylobacteria	Campylobacterales	Arcobacteraceae	Family: Arcobacteraceae	Family: Arcobacteraceae
6d41f2fab2b765aeaacd0bc8b4594149	14	VcPf1N	Unhealthy	Grotta_Vico	VC	White_Cave_Dweller	Cave	Ambient	P.ficiformis	No	Yes	PetrosiaVC	PF5	Bacteria	Firmicutes	Clostridia	Christensenellales	Christensenellaceae	Family: Christensenellaceae	Family: Christensenellaceae
60805ec8f40d411b1e5233fe8c2e3433	14	VcPf1N	Unhealthy	Grotta_Vico	VC	White_Cave_Dweller	Cave	Ambient	P.ficiformis	No	Yes	PetrosiaVC	PF5	Bacteria	Hydrogenedentes	Hydrogenedentia	Hydrogenedentiales	Hydrogenedensaceae	Hydrogenedensaceae	Genus: Hydrogenedensaceae
7d85ff09a11177999f913fa83caf99b2	14	VcPf1N	Unhealthy	Grotta_Vico	VC	White_Cave_Dweller	Cave	Ambient	P.ficiformis	No	Yes	PetrosiaVC	PF5	Archaea	Nanoarchaeota	Nanoarchaeia	Woesearchaeales	SCGC_AAA011-D5	SCGC_AAA011-D5	Genus: SCGC_AAA011-D5
abb2ff65c3c7457eb5728e1098ddeba9	14	VcPf1N	Unhealthy	Grotta_Vico	VC	White_Cave_Dweller	Cave	Ambient	P.ficiformis	No	Yes	PetrosiaVC	PF5	Archaea	Nanoarchaeota	Nanoarchaeia	Woesearchaeales	Woesearchaeales	Woesearchaeales	Genus: Woesearchaeales
1eff3ebd7dde1382c17801a9d6298ba9	14	VcPf1N	Unhealthy	Grotta_Vico	VC	White_Cave_Dweller	Cave	Ambient	P.ficiformis	No	Yes	PetrosiaVC	PF5	Bacteria	Proteobacteria	Alphaproteobacteria	Rhodospirillales	Terasakiellaceae	Family: Terasakiellaceae	Family: Terasakiellaceae
97c55f9b64b1030464388d09483411e9	14	VcPf1N	Unhealthy	Grotta_Vico	VC	White_Cave_Dweller	Cave	Ambient	P.ficiformis	No	Yes	PetrosiaVC	PF5	Bacteria	Proteobacteria	Alphaproteobacteria	Rhodobacterales	Rhodobacteraceae	Family: Rhodobacteraceae	Family: Rhodobacteraceae
985ca53f4e80e08a8d0ea3dd7b596701	14	VcPf1N	Unhealthy	Grotta_Vico	VC	White_Cave_Dweller	Cave	Ambient	P.ficiformis	No	Yes	PetrosiaVC	PF5	Bacteria	Proteobacteria	Alphaproteobacteria	Rhizobiales	Stappiaceae	Labrenzia	Genus: Labrenzia
99689d56f41af1720a0f4d60c43bebba	14	VcPf1N	Unhealthy	Grotta_Vico	VC	White_Cave_Dweller	Cave	Ambient	P.ficiformis	No	Yes	PetrosiaVC	PF5	Bacteria	Proteobacteria	Gammaproteobacteria	Ga0077536	Ga0077536	Ga0077536	Genus: Ga0077536
cef52cf2fbc2c5dc85aa059e95aa6cad	14	VcPf1N	Unhealthy	Grotta_Vico	VC	White_Cave_Dweller	Cave	Ambient	P.ficiformis	No	Yes	PetrosiaVC	PF5	Bacteria	Spirochaetota	Spirochaetia	Spirochaetales	Spirochaetaceae	Sediminispirochaeta	spirochete_endosymbiont
b9051691e08a46bbb9ccc5c48d51ab39	13	VcPf1N	Unhealthy	Grotta_Vico	VC	White_Cave_Dweller	Cave	Ambient	P.ficiformis	No	Yes	PetrosiaVC	PF5	Bacteria	Bacteroidota	Bacteroidia	Flavobacteriales	Flavobacteriaceae	Aquibacter	Genus: Aquibacter
742ced2a280d3872e2b5442c2a777ca1	13	VcPf1N	Unhealthy	Grotta_Vico	VC	White_Cave_Dweller	Cave	Ambient	P.ficiformis	No	Yes	PetrosiaVC	PF5	Bacteria	Cyanobacteria	Cyanobacteriia	Synechococcales	Cyanobiaceae	Cyanobium_PCC-6307	Genus: Cyanobium_PCC-6307
655f55b22943e1c0aaee6c44bf928794	13	VcPf1N	Unhealthy	Grotta_Vico	VC	White_Cave_Dweller	Cave	Ambient	P.ficiformis	No	Yes	PetrosiaVC	PF5	Bacteria	Fibrobacterota	Chitinivibrionia	Chitinivibrionales	Chitinivibrionaceae	possible_genus_03	Genus: possible_genus_03
6b2d7ccbe863e9f770a9a3c74e49a25b	13	VcPf1N	Unhealthy	Grotta_Vico	VC	White_Cave_Dweller	Cave	Ambient	P.ficiformis	No	Yes	PetrosiaVC	PF5	Bacteria	Firmicutes	Bacilli	RF39	RF39	RF39	Genus: RF39
e888fafc09a13d0b519ba3b17d7e8996	13	VcPf1N	Unhealthy	Grotta_Vico	VC	White_Cave_Dweller	Cave	Ambient	P.ficiformis	No	Yes	PetrosiaVC	PF5	Bacteria	Firmicutes	Clostridia	Peptococcales	Peptococcaceae	Family: Peptococcaceae	Family: Peptococcaceae
372cc57f503fa00ed3556fd26eef0933	13	VcPf1N	Unhealthy	Grotta_Vico	VC	White_Cave_Dweller	Cave	Ambient	P.ficiformis	No	Yes	PetrosiaVC	PF5	Bacteria	Hydrogenedentes	Hydrogenedentia	Hydrogenedentiales	Hydrogenedensaceae	Hydrogenedensaceae	Genus: Hydrogenedensaceae
90806f4a480b327380ca4332e2b6fa45	13	VcPf1N	Unhealthy	Grotta_Vico	VC	White_Cave_Dweller	Cave	Ambient	P.ficiformis	No	Yes	PetrosiaVC	PF5	Bacteria	Planctomycetota	Phycisphaerae	Phycisphaerales	Phycisphaeraceae	SM1A02	Genus: SM1A02
d1748b27105231a08dc2adc604c656f6	13	VcPf1N	Unhealthy	Grotta_Vico	VC	White_Cave_Dweller	Cave	Ambient	P.ficiformis	No	Yes	PetrosiaVC	PF5	Bacteria	Proteobacteria	Gammaproteobacteria	Pseudomonadales	KI89A_clade	KI89A_clade	Genus: KI89A_clade
e8b317d3492f091896861977712d86b5	13	VcPf1N	Unhealthy	Grotta_Vico	VC	White_Cave_Dweller	Cave	Ambient	P.ficiformis	No	Yes	PetrosiaVC	PF5	Bacteria	Proteobacteria	Alphaproteobacteria	Micavibrionales	Micavibrionaceae	Family: Micavibrionaceae	Family: Micavibrionaceae
1ab21897109b9b9534c1c90a9671c7b0	12	VcPf1N	Unhealthy	Grotta_Vico	VC	White_Cave_Dweller	Cave	Ambient	P.ficiformis	No	Yes	PetrosiaVC	PF5	Bacteria	Bacteroidota	Bacteroidia	Class: Bacteroidia	Class: Bacteroidia	Class: Bacteroidia	Class: Bacteroidia
fecad37602d4102e195145432a6e4fc3	12	VcPf1N	Unhealthy	Grotta_Vico	VC	White_Cave_Dweller	Cave	Ambient	P.ficiformis	No	Yes	PetrosiaVC	PF5	Bacteria	Bacteroidota	Ignavibacteria	Ignavibacteriales	Melioribacteraceae	IheB3-7	Genus: IheB3-7
663a4de3e31604fd44bc5356fcc80efa	12	VcPf1N	Unhealthy	Grotta_Vico	VC	White_Cave_Dweller	Cave	Ambient	P.ficiformis	No	Yes	PetrosiaVC	PF5	Bacteria	Bdellovibrionota	Bdellovibrionia	Bdellovibrionales	Bdellovibrionaceae	OM27_clade	Genus: OM27_clade
ccfe3a5031b704a2a1bbd9d705d8a4be	12	VcPf1N	Unhealthy	Grotta_Vico	VC	White_Cave_Dweller	Cave	Ambient	P.ficiformis	No	Yes	PetrosiaVC	PF5	Bacteria	Desulfobacterota	Desulfovibrionia	Desulfovibrionales	Desulfovibrionaceae	Desulfovibrio	Desulfovibrio_hontreensis
8c9621571b7030d72aef7e36aa5eaa66	12	VcPf1N	Unhealthy	Grotta_Vico	VC	White_Cave_Dweller	Cave	Ambient	P.ficiformis	No	Yes	PetrosiaVC	PF5	Bacteria	Firmicutes	Bacilli	RF39	RF39	RF39	Genus: RF39
1c0c7a85c186a18b028d4a6f1755ba6d	12	VcPf1N	Unhealthy	Grotta_Vico	VC	White_Cave_Dweller	Cave	Ambient	P.ficiformis	No	Yes	PetrosiaVC	PF5	Bacteria	Patescibacteria	Microgenomatia	Candidatus_Pacebacteria	Candidatus_Pacebacteria	Candidatus_Pacebacteria	Genus: Candidatus_Pacebacteria
16ad3c1f42e0f9675400fcd56eccea28	12	VcPf1N	Unhealthy	Grotta_Vico	VC	White_Cave_Dweller	Cave	Ambient	P.ficiformis	No	Yes	PetrosiaVC	PF5	Bacteria	Planctomycetota	028H05-P-BN-P5	028H05-P-BN-P5	028H05-P-BN-P5	028H05-P-BN-P5	Genus: 028H05-P-BN-P5
40af68d76deed7081f3a3ff347dde799	12	VcPf1N	Unhealthy	Grotta_Vico	VC	White_Cave_Dweller	Cave	Ambient	P.ficiformis	No	Yes	PetrosiaVC	PF5	Bacteria	Planctomycetota	Planctomycetes	Pirellulales	Pirellulaceae	Blastopirellula	Genus: Blastopirellula
bae86109440410c73ebaa3c31945254b	12	VcPf1N	Unhealthy	Grotta_Vico	VC	White_Cave_Dweller	Cave	Ambient	P.ficiformis	No	Yes	PetrosiaVC	PF5	Bacteria	Planctomycetota	Planctomycetes	Planctomycetales	Rubinisphaeraceae	Planctomicrobium	Genus: Planctomicrobium
29eaa0df9e8ab59ad4163d8d05dc7895	12	VcPf1N	Unhealthy	Grotta_Vico	VC	White_Cave_Dweller	Cave	Ambient	P.ficiformis	No	Yes	PetrosiaVC	PF5	Bacteria	Proteobacteria	Alphaproteobacteria	Defluviicoccales	Order: Defluviicoccales	Order: Defluviicoccales	Order: Defluviicoccales
d57fdbc752815ae48cb65204b5326f47	12	VcPf1N	Unhealthy	Grotta_Vico	VC	White_Cave_Dweller	Cave	Ambient	P.ficiformis	No	Yes	PetrosiaVC	PF5	Bacteria	Proteobacteria	Alphaproteobacteria	Class: Alphaproteobacteria	Class: Alphaproteobacteria	Class: Alphaproteobacteria	Class: Alphaproteobacteria
8cf0a1089baab71d8b66486805341af0	12	VcPf1N	Unhealthy	Grotta_Vico	VC	White_Cave_Dweller	Cave	Ambient	P.ficiformis	No	Yes	PetrosiaVC	PF5	Bacteria	Spirochaetota	Spirochaetia	Spirochaetales	Spirochaetaceae	Sediminispirochaeta	Genus: Sediminispirochaeta
343895b4e4cb35f6d503935320b832dc	11	VcPf1N	Unhealthy	Grotta_Vico	VC	White_Cave_Dweller	Cave	Ambient	P.ficiformis	No	Yes	PetrosiaVC	PF5	Bacteria	Bdellovibrionota	Oligoflexia	Oligoflexales	Oligoflexaceae	Family: Oligoflexaceae	Family: Oligoflexaceae
7394bb2be55a0b93e818dab3defd5df4	11	VcPf1N	Unhealthy	Grotta_Vico	VC	White_Cave_Dweller	Cave	Ambient	P.ficiformis	No	Yes	PetrosiaVC	PF5	Bacteria	Bdellovibrionota	Bdellovibrionia	Bacteriovoracales	Bacteriovoracaceae	Peredibacter	Genus: Peredibacter
c18331ec5f1f957fffdb9dc1c0a68d1c	11	VcPf1N	Unhealthy	Grotta_Vico	VC	White_Cave_Dweller	Cave	Ambient	P.ficiformis	No	Yes	PetrosiaVC	PF5	Bacteria	Bdellovibrionota	Bdellovibrionia	Bacteriovoracales	Bacteriovoracaceae	Family: Bacteriovoracaceae	Family: Bacteriovoracaceae
dfd920972148bfdfdb222a0baaf8859b	11	VcPf1N	Unhealthy	Grotta_Vico	VC	White_Cave_Dweller	Cave	Ambient	P.ficiformis	No	Yes	PetrosiaVC	PF5	Bacteria	Bdellovibrionota	Bdellovibrionia	Bdellovibrionales	Bdellovibrionaceae	Bdellovibrio	Genus: Bdellovibrio
b6ba2bf8a4469c06119df6a1740014ee	11	VcPf1N	Unhealthy	Grotta_Vico	VC	White_Cave_Dweller	Cave	Ambient	P.ficiformis	No	Yes	PetrosiaVC	PF5	Bacteria	Calditrichota	Calditrichia	Calditrichales	Calditrichaceae	Calditrichaceae	Genus: Calditrichaceae
7a49b987491ce7da736c1f689b33b50a	11	VcPf1N	Unhealthy	Grotta_Vico	VC	White_Cave_Dweller	Cave	Ambient	P.ficiformis	No	Yes	PetrosiaVC	PF5	Bacteria	Desulfobacterota	Desulfobacteria	Desulfobacterales	Desulfobacteraceae	Desulfobacter	Genus: Desulfobacter
478270f8adbd84e6355d8915534aea4e	11	VcPf1N	Unhealthy	Grotta_Vico	VC	White_Cave_Dweller	Cave	Ambient	P.ficiformis	No	Yes	PetrosiaVC	PF5	Bacteria	Kingdom: Bacteria	Kingdom: Bacteria	Kingdom: Bacteria	Kingdom: Bacteria	Kingdom: Bacteria	Kingdom: Bacteria
0b1487ae9f494a8c6dd8102b6d09f64f	11	VcPf1N	Unhealthy	Grotta_Vico	VC	White_Cave_Dweller	Cave	Ambient	P.ficiformis	No	Yes	PetrosiaVC	PF5	Bacteria	Planctomycetota	Phycisphaerae	Phycisphaerales	Phycisphaeraceae	SM1A02	Genus: SM1A02
c65e464bfe621902967b9fd6f9a00dcd	11	VcPf1N	Unhealthy	Grotta_Vico	VC	White_Cave_Dweller	Cave	Ambient	P.ficiformis	No	Yes	PetrosiaVC	PF5	Bacteria	Planctomycetota	Planctomycetes	Pirellulales	Pirellulaceae	Rhodopirellula	Genus: Rhodopirellula
d214d5766b480b1d973864f02ae3f566	11	VcPf1N	Unhealthy	Grotta_Vico	VC	White_Cave_Dweller	Cave	Ambient	P.ficiformis	No	Yes	PetrosiaVC	PF5	Bacteria	Planctomycetota	Planctomycetes	Pirellulales	Pirellulaceae	Family: Pirellulaceae	Family: Pirellulaceae
19a42afc1fe5b8556d83d8b3467bfc95	11	VcPf1N	Unhealthy	Grotta_Vico	VC	White_Cave_Dweller	Cave	Ambient	P.ficiformis	No	Yes	PetrosiaVC	PF5	Bacteria	Proteobacteria	Gammaproteobacteria	Enterobacterales	Vibrionaceae	Family: Vibrionaceae	Family: Vibrionaceae
24a9c64b0ea511aa4384a9c4b9a0ab9c	11	VcPf1N	Unhealthy	Grotta_Vico	VC	White_Cave_Dweller	Cave	Ambient	P.ficiformis	No	Yes	PetrosiaVC	PF5	Bacteria	Proteobacteria	Alphaproteobacteria	Rhizobiales	Rhizobiaceae	Pseudahrensia	Genus: Pseudahrensia
6971629c61deeb6ef1841ca16a40869c	11	VcPf1N	Unhealthy	Grotta_Vico	VC	White_Cave_Dweller	Cave	Ambient	P.ficiformis	No	Yes	PetrosiaVC	PF5	Bacteria	Proteobacteria	Gammaproteobacteria	Pseudomonadales	KI89A_clade	KI89A_clade	Genus: KI89A_clade
87e0aa152490f725acf14b5bd2a93914	11	VcPf1N	Unhealthy	Grotta_Vico	VC	White_Cave_Dweller	Cave	Ambient	P.ficiformis	No	Yes	PetrosiaVC	PF5	Bacteria	Proteobacteria	Alphaproteobacteria	Micavibrionales	Micavibrionaceae	Family: Micavibrionaceae	Family: Micavibrionaceae
8a49c33ef63fc70b040e345076d09cce	11	VcPf1N	Unhealthy	Grotta_Vico	VC	White_Cave_Dweller	Cave	Ambient	P.ficiformis	No	Yes	PetrosiaVC	PF5	Bacteria	Proteobacteria	Alphaproteobacteria	Parvibaculales	Parvibaculaceae	Family: Parvibaculaceae	Family: Parvibaculaceae
fbd0f1ae1dac55d19cf38de7d6cde5e9	11	VcPf1N	Unhealthy	Grotta_Vico	VC	White_Cave_Dweller	Cave	Ambient	P.ficiformis	No	Yes	PetrosiaVC	PF5	Bacteria	Proteobacteria	Gammaproteobacteria	Class: Gammaproteobacteria	Class: Gammaproteobacteria	Class: Gammaproteobacteria	Class: Gammaproteobacteria
2ab237913354ec8d07ccc52355f68ec3	10	VcPf1N	Unhealthy	Grotta_Vico	VC	White_Cave_Dweller	Cave	Ambient	P.ficiformis	No	Yes	PetrosiaVC	PF5	Bacteria	Bacteroidota	Bacteroidia	Flavobacteriales	Flavobacteriaceae	Seonamhaeicola	Genus: Seonamhaeicola
45ba98d476023fb75c99d8ab097e57a7	10	VcPf1N	Unhealthy	Grotta_Vico	VC	White_Cave_Dweller	Cave	Ambient	P.ficiformis	No	Yes	PetrosiaVC	PF5	Bacteria	Bacteroidota	Rhodothermia	Rhodothermales	Rhodothermaceae	Family: Rhodothermaceae	Family: Rhodothermaceae
52025238770f6af3e665056a77e6299e	10	VcPf1N	Unhealthy	Grotta_Vico	VC	White_Cave_Dweller	Cave	Ambient	P.ficiformis	No	Yes	PetrosiaVC	PF5	Bacteria	Bacteroidota	Bacteroidia	Chitinophagales	Saprospiraceae	Lewinella	Genus: Lewinella
b0ddec7f656b0837fe7d309bfe65b148	10	VcPf1N	Unhealthy	Grotta_Vico	VC	White_Cave_Dweller	Cave	Ambient	P.ficiformis	No	Yes	PetrosiaVC	PF5	Bacteria	Campylobacterota	Campylobacteria	Campylobacterales	Sulfurospirillaceae	Sulfurospirillum	Genus: Sulfurospirillum
c87cc3aabff05c2ff61637fce1888ee5	10	VcPf1N	Unhealthy	Grotta_Vico	VC	White_Cave_Dweller	Cave	Ambient	P.ficiformis	No	Yes	PetrosiaVC	PF5	Bacteria	Myxococcota	Polyangia	Haliangiales	Haliangiaceae	Haliangium	Genus: Haliangium
f74df17d6b3ffd3e0c783c81ac19910c	10	VcPf1N	Unhealthy	Grotta_Vico	VC	White_Cave_Dweller	Cave	Ambient	P.ficiformis	No	Yes	PetrosiaVC	PF5	Bacteria	Patescibacteria	Gracilibacteria	Gracilibacteria	Gracilibacteria	Gracilibacteria	Genus: Gracilibacteria
27ab0074d85c6611abf2bdea2fba8e1d	10	VcPf1N	Unhealthy	Grotta_Vico	VC	White_Cave_Dweller	Cave	Ambient	P.ficiformis	No	Yes	PetrosiaVC	PF5	Bacteria	Planctomycetota	OM190	OM190	OM190	OM190	Genus: OM190
3613c14203b20bd6f0baf9023cb337e8	10	VcPf1N	Unhealthy	Grotta_Vico	VC	White_Cave_Dweller	Cave	Ambient	P.ficiformis	No	Yes	PetrosiaVC	PF5	Bacteria	Planctomycetota	Phycisphaerae	Phycisphaerales	Phycisphaeraceae	SM1A02	Genus: SM1A02
98934b930f25cbfe9895e500b15b0ed5	10	VcPf1N	Unhealthy	Grotta_Vico	VC	White_Cave_Dweller	Cave	Ambient	P.ficiformis	No	Yes	PetrosiaVC	PF5	Bacteria	Planctomycetota	Phycisphaerae	Phycisphaerales	Phycisphaeraceae	Urania-1B-19_sediment	Genus: Urania-1B-19_sediment
e8ce0d0f40bc6b27e855ab7f2634c140	10	VcPf1N	Unhealthy	Grotta_Vico	VC	White_Cave_Dweller	Cave	Ambient	P.ficiformis	No	Yes	PetrosiaVC	PF5	Bacteria	Planctomycetota	Phycisphaerae	Phycisphaerales	Phycisphaeraceae	Urania-1B-19_sediment	Genus: Urania-1B-19_sediment
9a21e1c84e132755df45ca2cb1469526	10	VcPf1N	Unhealthy	Grotta_Vico	VC	White_Cave_Dweller	Cave	Ambient	P.ficiformis	No	Yes	PetrosiaVC	PF5	Bacteria	Proteobacteria	Alphaproteobacteria	Micavibrionales	Micavibrionaceae	Family: Micavibrionaceae	Family: Micavibrionaceae
a690a0de10a31c219f61b4aa37418a31	10	VcPf1N	Unhealthy	Grotta_Vico	VC	White_Cave_Dweller	Cave	Ambient	P.ficiformis	No	Yes	PetrosiaVC	PF5	Bacteria	Proteobacteria	Alphaproteobacteria	Rhodospirillales	Terasakiellaceae	Family: Terasakiellaceae	Family: Terasakiellaceae
7acad2aee865c3288580a5efb485debc	9	VcPf1N	Unhealthy	Grotta_Vico	VC	White_Cave_Dweller	Cave	Ambient	P.ficiformis	No	Yes	PetrosiaVC	PF5	Bacteria	Acidobacteriota	Vicinamibacteria	Vicinamibacterales	Order: Vicinamibacterales	Order: Vicinamibacterales	Order: Vicinamibacterales
6f451eccab86142bba8d1ddd9b61c28d	9	VcPf1N	Unhealthy	Grotta_Vico	VC	White_Cave_Dweller	Cave	Ambient	P.ficiformis	No	Yes	PetrosiaVC	PF5	Bacteria	Bdellovibrionota	Bdellovibrionia	Bdellovibrionales	Bdellovibrionaceae	Bdellovibrio	Genus: Bdellovibrio
a47f17dda1e5f32554991e39e89a7360	9	VcPf1N	Unhealthy	Grotta_Vico	VC	White_Cave_Dweller	Cave	Ambient	P.ficiformis	No	Yes	PetrosiaVC	PF5	Bacteria	Cyanobacteria	Vampirivibrionia	Gastranaerophilales	Gastranaerophilales	Gastranaerophilales	Genus: Gastranaerophilales
bcebcf5219368ffe87c7afc4226c507d	9	VcPf1N	Unhealthy	Grotta_Vico	VC	White_Cave_Dweller	Cave	Ambient	P.ficiformis	No	Yes	PetrosiaVC	PF5	Bacteria	Dependentiae	Babeliae	Babeliales	Babeliaceae	Babeliaceae	Genus: Babeliaceae
bde571c1071072dab43ee92c07079ca7	9	VcPf1N	Unhealthy	Grotta_Vico	VC	White_Cave_Dweller	Cave	Ambient	P.ficiformis	No	Yes	PetrosiaVC	PF5	Bacteria	Gemmatimonadota	BD2-11_terrestrial	BD2-11_terrestrial	BD2-11_terrestrial	BD2-11_terrestrial	Genus: BD2-11_terrestrial
263effe7f3f05e5c595f8a2b4fdc3507	9	VcPf1N	Unhealthy	Grotta_Vico	VC	White_Cave_Dweller	Cave	Ambient	P.ficiformis	No	Yes	PetrosiaVC	PF5	Bacteria	Myxococcota	Polyangia	Nannocystales	Nannocystaceae	Family: Nannocystaceae	Family: Nannocystaceae
5fccd8f31070e49c02930fa9667daf57	9	VcPf1N	Unhealthy	Grotta_Vico	VC	White_Cave_Dweller	Cave	Ambient	P.ficiformis	No	Yes	PetrosiaVC	PF5	Bacteria	Planctomycetota	Planctomycetes	Pirellulales	Pirellulaceae	Rhodopirellula	Genus: Rhodopirellula
762707d0012d8ef47610e7af2d04678f	9	VcPf1N	Unhealthy	Grotta_Vico	VC	White_Cave_Dweller	Cave	Ambient	P.ficiformis	No	Yes	PetrosiaVC	PF5	Bacteria	Planctomycetota	Planctomycetes	Planctomycetales	Rubinisphaeraceae	Fuerstia	Genus: Fuerstia
bc0abc939d7ee0355da24dc200189c55	9	VcPf1N	Unhealthy	Grotta_Vico	VC	White_Cave_Dweller	Cave	Ambient	P.ficiformis	No	Yes	PetrosiaVC	PF5	Bacteria	Planctomycetota	Planctomycetes	Pirellulales	Pirellulaceae	Pir4_lineage	Genus: Pir4_lineage
21af4ef9e9a6902cd603edd532205f89	9	VcPf1N	Unhealthy	Grotta_Vico	VC	White_Cave_Dweller	Cave	Ambient	P.ficiformis	No	Yes	PetrosiaVC	PF5	Bacteria	Proteobacteria	Alphaproteobacteria	Rhizobiales	Methyloligellaceae	Family: Methyloligellaceae	Family: Methyloligellaceae
53ca5fa1ee28e44048948dab3f0bc190	9	VcPf1N	Unhealthy	Grotta_Vico	VC	White_Cave_Dweller	Cave	Ambient	P.ficiformis	No	Yes	PetrosiaVC	PF5	Bacteria	Proteobacteria	Alphaproteobacteria	Caulobacterales	Parvularculaceae	Marinicaulis	Genus: Marinicaulis
a05afa3acf6c209552026b81c649d2bb	9	VcPf1N	Unhealthy	Grotta_Vico	VC	White_Cave_Dweller	Cave	Ambient	P.ficiformis	No	Yes	PetrosiaVC	PF5	Bacteria	Proteobacteria	Alphaproteobacteria	Caulobacterales	Hyphomonadaceae	Maricaulis	alpha_proteobacterium
ca024f61e1868483b6549fe4a54b62fc	9	VcPf1N	Unhealthy	Grotta_Vico	VC	White_Cave_Dweller	Cave	Ambient	P.ficiformis	No	Yes	PetrosiaVC	PF5	Bacteria	Proteobacteria	Alphaproteobacteria	Rhizobiales	Methyloligellaceae	Family: Methyloligellaceae	Family: Methyloligellaceae
70dc098aec981da1c75f3e79534ab13d	9	VcPf1N	Unhealthy	Grotta_Vico	VC	White_Cave_Dweller	Cave	Ambient	P.ficiformis	No	Yes	PetrosiaVC	PF5	Bacteria	Spirochaetota	Leptospirae	Leptospirales	Leptospiraceae	Family: Leptospiraceae	Family: Leptospiraceae
4e6c14d0e36751f97093d4ee938cbc3b	8	VcPf1N	Unhealthy	Grotta_Vico	VC	White_Cave_Dweller	Cave	Ambient	P.ficiformis	No	Yes	PetrosiaVC	PF5	Bacteria	Acidobacteriota	Acidobacteriae	PAUC26f	PAUC26f	PAUC26f	Genus: PAUC26f
8d1e5446e41b1ca5977f8d39cfbbec07	8	VcPf1N	Unhealthy	Grotta_Vico	VC	White_Cave_Dweller	Cave	Ambient	P.ficiformis	No	Yes	PetrosiaVC	PF5	Bacteria	Bacteroidota	Bacteroidia	Bacteroidales	Prolixibacteraceae	Prolixibacter	Genus: Prolixibacter
15ccefdc889503eb7771e1ddf381a896	8	VcPf1N	Unhealthy	Grotta_Vico	VC	White_Cave_Dweller	Cave	Ambient	P.ficiformis	No	Yes	PetrosiaVC	PF5	Bacteria	Bdellovibrionota	Bdellovibrionia	Bdellovibrionales	Bdellovibrionaceae	Bdellovibrio	Genus: Bdellovibrio
fd9bf7e50ad4d8ef9b3756acdc0b09fe	8	VcPf1N	Unhealthy	Grotta_Vico	VC	White_Cave_Dweller	Cave	Ambient	P.ficiformis	No	Yes	PetrosiaVC	PF5	Bacteria	Campylobacterota	Campylobacteria	Campylobacterales	Arcobacteraceae	Halarcobacter	Genus: Halarcobacter
0342036ff165166aebf00fd5b697524e	8	VcPf1N	Unhealthy	Grotta_Vico	VC	White_Cave_Dweller	Cave	Ambient	P.ficiformis	No	Yes	PetrosiaVC	PF5	Bacteria	Chloroflexi	TK17	TK17	TK17	TK17	Genus: TK17
1d262b7adb278f4b4652b95d0e145dd8	8	VcPf1N	Unhealthy	Grotta_Vico	VC	White_Cave_Dweller	Cave	Ambient	P.ficiformis	No	Yes	PetrosiaVC	PF5	Bacteria	Desulfobacterota	Desulfobacteria	Desulfobacterales	Desulfobacteraceae	Desulfobacter	Genus: Desulfobacter
75c9e1c9aba46b2fe8856b38312b59c2	8	VcPf1N	Unhealthy	Grotta_Vico	VC	White_Cave_Dweller	Cave	Ambient	P.ficiformis	No	Yes	PetrosiaVC	PF5	Bacteria	Firmicutes	Bacilli	Izemoplasmatales	Izemoplasmataceae	Izimaplasma	Genus: Izimaplasma
a5dbe35bb788c67abb5ce73af54cafaf	8	VcPf1N	Unhealthy	Grotta_Vico	VC	White_Cave_Dweller	Cave	Ambient	P.ficiformis	No	Yes	PetrosiaVC	PF5	Bacteria	Firmicutes	Clostridia	Clostridiales	Clostridiaceae	Family: Clostridiaceae	Family: Clostridiaceae
f6f930d8f9f9dfff1fb34329c8df0209	8	VcPf1N	Unhealthy	Grotta_Vico	VC	White_Cave_Dweller	Cave	Ambient	P.ficiformis	No	Yes	PetrosiaVC	PF5	Bacteria	Firmicutes	Clostridia	Clostridia_vadinBB60	Clostridia_vadinBB60	Clostridia_vadinBB60	Genus: Clostridia_vadinBB60
6b2ac4dbe281471e46054696cd9cf21e	8	VcPf1N	Unhealthy	Grotta_Vico	VC	White_Cave_Dweller	Cave	Ambient	P.ficiformis	No	Yes	PetrosiaVC	PF5	Bacteria	Patescibacteria	Parcubacteria	Candidatus_Spechtbacteria	Candidatus_Spechtbacteria	Candidatus_Spechtbacteria	Genus: Candidatus_Spechtbacteria
4f719e5c24cdae05ca28cc6a23f7f648	8	VcPf1N	Unhealthy	Grotta_Vico	VC	White_Cave_Dweller	Cave	Ambient	P.ficiformis	No	Yes	PetrosiaVC	PF5	Bacteria	Planctomycetota	Phycisphaerae	Phycisphaerales	Phycisphaeraceae	SM1A02	Genus: SM1A02
5321e6bfed10aa303bf4b17d1c58002e	8	VcPf1N	Unhealthy	Grotta_Vico	VC	White_Cave_Dweller	Cave	Ambient	P.ficiformis	No	Yes	PetrosiaVC	PF5	Bacteria	Planctomycetota	Phycisphaerae	Phycisphaerales	Phycisphaeraceae	SM1A02	Genus: SM1A02
6ff4131fe03403ed9d8c5b213b32e6b7	8	VcPf1N	Unhealthy	Grotta_Vico	VC	White_Cave_Dweller	Cave	Ambient	P.ficiformis	No	Yes	PetrosiaVC	PF5	Bacteria	Planctomycetota	Planctomycetes	Class: Planctomycetes	Class: Planctomycetes	Class: Planctomycetes	Class: Planctomycetes
79b296770508d2d4590f1beafe45b840	8	VcPf1N	Unhealthy	Grotta_Vico	VC	White_Cave_Dweller	Cave	Ambient	P.ficiformis	No	Yes	PetrosiaVC	PF5	Bacteria	Planctomycetota	Phycisphaerae	Phycisphaerales	Phycisphaeraceae	Family: Phycisphaeraceae	Family: Phycisphaeraceae
9facd2806bfdaa6cbe1507595bf0024a	8	VcPf1N	Unhealthy	Grotta_Vico	VC	White_Cave_Dweller	Cave	Ambient	P.ficiformis	No	Yes	PetrosiaVC	PF5	Bacteria	Planctomycetota	Planctomycetes	Pirellulales	Pirellulaceae	Blastopirellula	Genus: Blastopirellula
cbb61b449b5005a5f1b1e22737ad3e7b	8	VcPf1N	Unhealthy	Grotta_Vico	VC	White_Cave_Dweller	Cave	Ambient	P.ficiformis	No	Yes	PetrosiaVC	PF5	Bacteria	Planctomycetota	Phycisphaerae	MSBL9	L21-RPul-D3	L21-RPul-D3	Genus: L21-RPul-D3
db62a63624cfc9d0a5054764163fb4cc	8	VcPf1N	Unhealthy	Grotta_Vico	VC	White_Cave_Dweller	Cave	Ambient	P.ficiformis	No	Yes	PetrosiaVC	PF5	Bacteria	Planctomycetota	Planctomycetes	Planctomycetales	Gimesiaceae	Family: Gimesiaceae	Family: Gimesiaceae
eb0f61169229a8f8f90f1434dae7ef83	8	VcPf1N	Unhealthy	Grotta_Vico	VC	White_Cave_Dweller	Cave	Ambient	P.ficiformis	No	Yes	PetrosiaVC	PF5	Bacteria	Planctomycetota	OM190	OM190	OM190	OM190	Genus: OM190
ed4a56b1e43eede2cbd3b121f3dce2f0	8	VcPf1N	Unhealthy	Grotta_Vico	VC	White_Cave_Dweller	Cave	Ambient	P.ficiformis	No	Yes	PetrosiaVC	PF5	Bacteria	Planctomycetota	Phycisphaerae	Phycisphaerales	Phycisphaeraceae	SM1A02	Genus: SM1A02
815af9c12ced57e88c6de446a049f68b	8	VcPf1N	Unhealthy	Grotta_Vico	VC	White_Cave_Dweller	Cave	Ambient	P.ficiformis	No	Yes	PetrosiaVC	PF5	Bacteria	Proteobacteria	Gammaproteobacteria	Enterobacterales	Kangiellaceae	Aliikangiella	Genus: Aliikangiella
a5ad59c8c463d4c266d8285bb6e69fe8	8	VcPf1N	Unhealthy	Grotta_Vico	VC	White_Cave_Dweller	Cave	Ambient	P.ficiformis	No	Yes	PetrosiaVC	PF5	Bacteria	Proteobacteria	Alphaproteobacteria	Rhizobiales	Rhizobiaceae	Family: Rhizobiaceae	Family: Rhizobiaceae
ad202ef034bc5dbf29196f88e236c724	8	VcPf1N	Unhealthy	Grotta_Vico	VC	White_Cave_Dweller	Cave	Ambient	P.ficiformis	No	Yes	PetrosiaVC	PF5	Bacteria	Proteobacteria	Gammaproteobacteria	Pseudomonadales	Nitrincolaceae	Family: Nitrincolaceae	Family: Nitrincolaceae
d3394717cdc7548aad94a51dfecc3f01	8	VcPf1N	Unhealthy	Grotta_Vico	VC	White_Cave_Dweller	Cave	Ambient	P.ficiformis	No	Yes	PetrosiaVC	PF5	Bacteria	Proteobacteria	Alphaproteobacteria	Micavibrionales	Micavibrionaceae	Family: Micavibrionaceae	Family: Micavibrionaceae
77c2be63b769319ad97f386e703f0ce2	8	VcPf1N	Unhealthy	Grotta_Vico	VC	White_Cave_Dweller	Cave	Ambient	P.ficiformis	No	Yes	PetrosiaVC	PF5	Bacteria	Spirochaetota	Spirochaetia	Spirochaetales	Spirochaetaceae	Sediminispirochaeta	Genus: Sediminispirochaeta
6e4a23e08d8c54bdbce777c4fe035de1	8	VcPf1N	Unhealthy	Grotta_Vico	VC	White_Cave_Dweller	Cave	Ambient	P.ficiformis	No	Yes	PetrosiaVC	PF5	Bacteria	Verrucomicrobiota	Verrucomicrobiae	Verrucomicrobiales	Rubritaleaceae	Haloferula	Genus: Haloferula
1245cd49af9676e233f03fb88af1ba57	7	VcPf1N	Unhealthy	Grotta_Vico	VC	White_Cave_Dweller	Cave	Ambient	P.ficiformis	No	Yes	PetrosiaVC	PF5	Bacteria	Actinobacteriota	Acidimicrobiia	Microtrichales	Microtrichaceae	Sva0996_group	Genus: Sva0996_group
859b7c62c6b5d346d976fd4b79316d1f	7	VcPf1N	Unhealthy	Grotta_Vico	VC	White_Cave_Dweller	Cave	Ambient	P.ficiformis	No	Yes	PetrosiaVC	PF5	Bacteria	Actinobacteriota	Acidimicrobiia	Actinomarinales	Order: Actinomarinales	Order: Actinomarinales	Order: Actinomarinales
c519754ae8e2980c62fe9500f27330bf	7	VcPf1N	Unhealthy	Grotta_Vico	VC	White_Cave_Dweller	Cave	Ambient	P.ficiformis	No	Yes	PetrosiaVC	PF5	Bacteria	Actinobacteriota	Thermoleophilia	Gaiellales	Order: Gaiellales	Order: Gaiellales	Order: Gaiellales
f1e295b87b76fb60702e856ca1a8893f	7	VcPf1N	Unhealthy	Grotta_Vico	VC	White_Cave_Dweller	Cave	Ambient	P.ficiformis	No	Yes	PetrosiaVC	PF5	Bacteria	Actinobacteriota	Acidimicrobiia	Microtrichales	Microtrichaceae	Sva0996_group	Genus: Sva0996_group
0e9e60d060dbe41227ad331f65692786	7	VcPf1N	Unhealthy	Grotta_Vico	VC	White_Cave_Dweller	Cave	Ambient	P.ficiformis	No	Yes	PetrosiaVC	PF5	Bacteria	Bacteroidota	Bacteroidia	Flavobacteriales	Flavobacteriaceae	Tenacibaculum	Tenacibaculum_sp.
9c079e64367504cc1d9c31edda09374d	7	VcPf1N	Unhealthy	Grotta_Vico	VC	White_Cave_Dweller	Cave	Ambient	P.ficiformis	No	Yes	PetrosiaVC	PF5	Bacteria	Bdellovibrionota	Bdellovibrionia	Bacteriovoracales	Bacteriovoracaceae	Peredibacter	Genus: Peredibacter
e7e8ad9ad75d14a8a190af71d1eb9818	7	VcPf1N	Unhealthy	Grotta_Vico	VC	White_Cave_Dweller	Cave	Ambient	P.ficiformis	No	Yes	PetrosiaVC	PF5	Bacteria	Desulfobacterota	Desulfuromonadia	Bradymonadales	Bradymonadales	Bradymonadales	Genus: Bradymonadales
fab7c6254f8fa4428f3b805e1f33da5f	7	VcPf1N	Unhealthy	Grotta_Vico	VC	White_Cave_Dweller	Cave	Ambient	P.ficiformis	No	Yes	PetrosiaVC	PF5	Archaea	Nanoarchaeota	Nanoarchaeia	Woesearchaeales	SCGC_AAA011-D5	SCGC_AAA011-D5	Genus: SCGC_AAA011-D5
f69f7ccddd083b4b5e17ada8c9fdbbf9	7	VcPf1N	Unhealthy	Grotta_Vico	VC	White_Cave_Dweller	Cave	Ambient	P.ficiformis	No	Yes	PetrosiaVC	PF5	Bacteria	Patescibacteria	Gracilibacteria	Candidatus_Peribacteria	Candidatus_Peribacteria	Candidatus_Peribacteria	Genus: Candidatus_Peribacteria
8fbe7d4f477980219a8d004c311b26d6	7	VcPf1N	Unhealthy	Grotta_Vico	VC	White_Cave_Dweller	Cave	Ambient	P.ficiformis	No	Yes	PetrosiaVC	PF5	Bacteria	Planctomycetota	Planctomycetes	Pirellulales	Pirellulaceae	Rhodopirellula	Genus: Rhodopirellula
ecf360df0b9c64b5f017b9b0f8255366	7	VcPf1N	Unhealthy	Grotta_Vico	VC	White_Cave_Dweller	Cave	Ambient	P.ficiformis	No	Yes	PetrosiaVC	PF5	Bacteria	Planctomycetota	Planctomycetes	Pirellulales	Pirellulaceae	Rhodopirellula	Genus: Rhodopirellula
3bb37fa4dd693442cf867b072e49e9c8	7	VcPf1N	Unhealthy	Grotta_Vico	VC	White_Cave_Dweller	Cave	Ambient	P.ficiformis	No	Yes	PetrosiaVC	PF5	Bacteria	Proteobacteria	Alphaproteobacteria	Class: Alphaproteobacteria	Class: Alphaproteobacteria	Class: Alphaproteobacteria	Class: Alphaproteobacteria
56be9c68cc977b541b255fa7c77ea2b9	7	VcPf1N	Unhealthy	Grotta_Vico	VC	White_Cave_Dweller	Cave	Ambient	P.ficiformis	No	Yes	PetrosiaVC	PF5	Bacteria	Proteobacteria	Gammaproteobacteria	Arenicellales	Arenicellaceae	HTCC5015	Genus: HTCC5015
9a6acb8e3af8d0bc433053af67d333ba	7	VcPf1N	Unhealthy	Grotta_Vico	VC	White_Cave_Dweller	Cave	Ambient	P.ficiformis	No	Yes	PetrosiaVC	PF5	Bacteria	Proteobacteria	Alphaproteobacteria	Parvibaculales	PS1_clade	PS1_clade	Genus: PS1_clade
cc969b54f1635945e10268dc99930a03	7	VcPf1N	Unhealthy	Grotta_Vico	VC	White_Cave_Dweller	Cave	Ambient	P.ficiformis	No	Yes	PetrosiaVC	PF5	Bacteria	Proteobacteria	Gammaproteobacteria	Pseudomonadales	Halieaceae	Family: Halieaceae	Family: Halieaceae
cf098c709c8fe1cbfd0040573345a24e	7	VcPf1N	Unhealthy	Grotta_Vico	VC	White_Cave_Dweller	Cave	Ambient	P.ficiformis	No	Yes	PetrosiaVC	PF5	Bacteria	Sumerlaeota	Sumerlaeia	Sumerlaeales	Sumerlaeaceae	Sumerlaea	Genus: Sumerlaea
70dbcfcf20cef756dcd55c9bd968bab1	6	VcPf1N	Unhealthy	Grotta_Vico	VC	White_Cave_Dweller	Cave	Ambient	P.ficiformis	No	Yes	PetrosiaVC	PF5	Bacteria	Bacteroidota	Bacteroidia	Flavobacteriales	NS9_group	NS9_group	Genus: NS9_group
8c6d54d71be0438c283bd43f3fff3557	6	VcPf1N	Unhealthy	Grotta_Vico	VC	White_Cave_Dweller	Cave	Ambient	P.ficiformis	No	Yes	PetrosiaVC	PF5	Bacteria	Bacteroidota	Bacteroidia	Bacteroidales	Bacteroidetes_BD2-2	Bacteroidetes_BD2-2	Genus: Bacteroidetes_BD2-2
ab595d3ab0ce5dc3e01a5f97884231e0	6	VcPf1N	Unhealthy	Grotta_Vico	VC	White_Cave_Dweller	Cave	Ambient	P.ficiformis	No	Yes	PetrosiaVC	PF5	Bacteria	Bacteroidota	Bacteroidia	Flavobacteriales	Cryomorphaceae	Vicingus	Genus: Vicingus
ca6a0d815ff5f3311932d18084852392	6	VcPf1N	Unhealthy	Grotta_Vico	VC	White_Cave_Dweller	Cave	Ambient	P.ficiformis	No	Yes	PetrosiaVC	PF5	Bacteria	Bdellovibrionota	Oligoflexia	Oligoflexales	Oligoflexaceae	Family: Oligoflexaceae	Family: Oligoflexaceae
f9f148255512fc25a2401e3c1f0bed68	6	VcPf1N	Unhealthy	Grotta_Vico	VC	White_Cave_Dweller	Cave	Ambient	P.ficiformis	No	Yes	PetrosiaVC	PF5	Bacteria	Bdellovibrionota	Bdellovibrionia	Bacteriovoracales	Bacteriovoracaceae	Peredibacter	Genus: Peredibacter
d1a16bb7488e17613215e461434fb602	6	VcPf1N	Unhealthy	Grotta_Vico	VC	White_Cave_Dweller	Cave	Ambient	P.ficiformis	No	Yes	PetrosiaVC	PF5	Bacteria	Chloroflexi	Anaerolineae	SBR1031	A4b	A4b	Genus: A4b
5600a3e6759daae68466f438389ec894	6	VcPf1N	Unhealthy	Grotta_Vico	VC	White_Cave_Dweller	Cave	Ambient	P.ficiformis	No	Yes	PetrosiaVC	PF5	Bacteria	Planctomycetota	Planctomycetes	Pirellulales	Pirellulaceae	Blastopirellula	Genus: Blastopirellula
704130b6de4398dfa9d8e388b121d363	6	VcPf1N	Unhealthy	Grotta_Vico	VC	White_Cave_Dweller	Cave	Ambient	P.ficiformis	No	Yes	PetrosiaVC	PF5	Bacteria	Planctomycetota	Planctomycetes	Pirellulales	Pirellulaceae	Rhodopirellula	Genus: Rhodopirellula
7f150f90652d8a628464dcded0ab5b1e	6	VcPf1N	Unhealthy	Grotta_Vico	VC	White_Cave_Dweller	Cave	Ambient	P.ficiformis	No	Yes	PetrosiaVC	PF5	Bacteria	Planctomycetota	Planctomycetes	Pirellulales	Pirellulaceae	Rhodopirellula	Genus: Rhodopirellula
f435409d052f2bb791bc8d7ef9dda02f	6	VcPf1N	Unhealthy	Grotta_Vico	VC	White_Cave_Dweller	Cave	Ambient	P.ficiformis	No	Yes	PetrosiaVC	PF5	Bacteria	Planctomycetota	Planctomycetes	Pirellulales	Pirellulaceae	Blastopirellula	Genus: Blastopirellula
00ad12890ec71098443880584380fba5	6	VcPf1N	Unhealthy	Grotta_Vico	VC	White_Cave_Dweller	Cave	Ambient	P.ficiformis	No	Yes	PetrosiaVC	PF5	Bacteria	Proteobacteria	Gammaproteobacteria	Pseudomonadales	OM182_clade	OM182_clade	Genus: OM182_clade
2ed8f796956b55ea20bdb27674fe6f8e	6	VcPf1N	Unhealthy	Grotta_Vico	VC	White_Cave_Dweller	Cave	Ambient	P.ficiformis	No	Yes	PetrosiaVC	PF5	Bacteria	Proteobacteria	Gammaproteobacteria	Pseudomonadales	Spongiibacteraceae	BD1-7_clade	Genus: BD1-7_clade
2ee9b5411d3ae3268ce65e76980f3655	6	VcPf1N	Unhealthy	Grotta_Vico	VC	White_Cave_Dweller	Cave	Ambient	P.ficiformis	No	Yes	PetrosiaVC	PF5	Bacteria	Proteobacteria	Alphaproteobacteria	Paracaedibacterales	Paracaedibacteraceae	Family: Paracaedibacteraceae	Family: Paracaedibacteraceae
59c73a72da0132bf7f972fe0b1ee55a6	6	VcPf1N	Unhealthy	Grotta_Vico	VC	White_Cave_Dweller	Cave	Ambient	P.ficiformis	No	Yes	PetrosiaVC	PF5	Bacteria	Proteobacteria	Alphaproteobacteria	Rhizobiales	Stappiaceae	Stappiaceae	Genus: Stappiaceae
981d8dfab53f56fdc8bfd8a258bf5c6a	6	VcPf1N	Unhealthy	Grotta_Vico	VC	White_Cave_Dweller	Cave	Ambient	P.ficiformis	No	Yes	PetrosiaVC	PF5	Bacteria	Proteobacteria	Alphaproteobacteria	Rhizobiales	Methyloligellaceae	Rhodobium	Rhodobium_orientis
ae1ed762e9f5447b66f3fd640c021190	6	VcPf1N	Unhealthy	Grotta_Vico	VC	White_Cave_Dweller	Cave	Ambient	P.ficiformis	No	Yes	PetrosiaVC	PF5	Bacteria	Verrucomicrobiota	Lentisphaeria	Victivallales	PRD18C08	PRD18C08	Genus: PRD18C08
b946418b81d413ab0c04677706039f85	6	VcPf1N	Unhealthy	Grotta_Vico	VC	White_Cave_Dweller	Cave	Ambient	P.ficiformis	No	Yes	PetrosiaVC	PF5	Bacteria	WPS-2	WPS-2	WPS-2	WPS-2	WPS-2	Genus: WPS-2
9e0c156f3e2620b5e57bfbcfa4345c75	5	VcPf1N	Unhealthy	Grotta_Vico	VC	White_Cave_Dweller	Cave	Ambient	P.ficiformis	No	Yes	PetrosiaVC	PF5	Bacteria	Actinobacteriota	Acidimicrobiia	Microtrichales	Microtrichaceae	Sva0996_group	Genus: Sva0996_group
36275481c688c79bafc0bcb17e1b3d7f	5	VcPf1N	Unhealthy	Grotta_Vico	VC	White_Cave_Dweller	Cave	Ambient	P.ficiformis	No	Yes	PetrosiaVC	PF5	Bacteria	Bacteroidota	Bacteroidia	Flavobacteriales	Crocinitomicaceae	Crocinitomix	Genus: Crocinitomix
dd0d2d91ef10caf9c8c16abdcff3b759	5	VcPf1N	Unhealthy	Grotta_Vico	VC	White_Cave_Dweller	Cave	Ambient	P.ficiformis	No	Yes	PetrosiaVC	PF5	Bacteria	Bacteroidota	Bacteroidia	Flavobacteriales	NS9_group	NS9_group	Genus: NS9_group
2efcc712013e664568363e1b68306c23	5	VcPf1N	Unhealthy	Grotta_Vico	VC	White_Cave_Dweller	Cave	Ambient	P.ficiformis	No	Yes	PetrosiaVC	PF5	Bacteria	Bdellovibrionota	Oligoflexia	Oligoflexales	Oligoflexaceae	Family: Oligoflexaceae	Family: Oligoflexaceae
e2a4c4c7b2962477cf0ae0744cd41839	5	VcPf1N	Unhealthy	Grotta_Vico	VC	White_Cave_Dweller	Cave	Ambient	P.ficiformis	No	Yes	PetrosiaVC	PF5	Bacteria	Bdellovibrionota	Bdellovibrionia	Bacteriovoracales	Bacteriovoracaceae	Peredibacter	Genus: Peredibacter
f2006d9f5c66b195e1f9a4877e4dbe71	5	VcPf1N	Unhealthy	Grotta_Vico	VC	White_Cave_Dweller	Cave	Ambient	P.ficiformis	No	Yes	PetrosiaVC	PF5	Bacteria	Bdellovibrionota	Bdellovibrionia	Bacteriovoracales	Bacteriovoracaceae	Family: Bacteriovoracaceae	Family: Bacteriovoracaceae
3ae3a4c1d15ab9bb40be2c87ea300c49	5	VcPf1N	Unhealthy	Grotta_Vico	VC	White_Cave_Dweller	Cave	Ambient	P.ficiformis	No	Yes	PetrosiaVC	PF5	Bacteria	Firmicutes	Clostridia	Clostridia_vadinBB60	Clostridia_vadinBB60	Clostridia_vadinBB60	Genus: Clostridia_vadinBB60
9cbfc1610f387bc67d99ceed432f219b	5	VcPf1N	Unhealthy	Grotta_Vico	VC	White_Cave_Dweller	Cave	Ambient	P.ficiformis	No	Yes	PetrosiaVC	PF5	Bacteria	Gemmatimonadota	BD2-11_terrestrial	BD2-11_terrestrial	BD2-11_terrestrial	BD2-11_terrestrial	Genus: BD2-11_terrestrial
769e176c0d0759b2f6237e25e84d2bba	5	VcPf1N	Unhealthy	Grotta_Vico	VC	White_Cave_Dweller	Cave	Ambient	P.ficiformis	No	Yes	PetrosiaVC	PF5	Bacteria	Planctomycetota	OM190	OM190	OM190	OM190	Genus: OM190
cfc876dd768063037610dfdeebc67c99	5	VcPf1N	Unhealthy	Grotta_Vico	VC	White_Cave_Dweller	Cave	Ambient	P.ficiformis	No	Yes	PetrosiaVC	PF5	Bacteria	Planctomycetota	Phycisphaerae	Phycisphaerales	Phycisphaeraceae	Phycisphaera	Genus: Phycisphaera
d3203ab6765d83f3d175b8a0f4406959	5	VcPf1N	Unhealthy	Grotta_Vico	VC	White_Cave_Dweller	Cave	Ambient	P.ficiformis	No	Yes	PetrosiaVC	PF5	Bacteria	Planctomycetota	Planctomycetes	Planctomycetales	Order: Planctomycetales	Order: Planctomycetales	Order: Planctomycetales
1b6481260dd5b7c200ca08b082bc9d8b	5	VcPf1N	Unhealthy	Grotta_Vico	VC	White_Cave_Dweller	Cave	Ambient	P.ficiformis	No	Yes	PetrosiaVC	PF5	Bacteria	Proteobacteria	Gammaproteobacteria	Pseudomonadales	Spongiibacteraceae	Family: Spongiibacteraceae	Family: Spongiibacteraceae
62a553bf8e561b989f56cb38b943b9ba	5	VcPf1N	Unhealthy	Grotta_Vico	VC	White_Cave_Dweller	Cave	Ambient	P.ficiformis	No	Yes	PetrosiaVC	PF5	Bacteria	Proteobacteria	Alphaproteobacteria	Rhizobiales	Rhizobiales_Incertae_Sedis	Anderseniella	Genus: Anderseniella
828271a1e92d2b67785da31401205226	5	VcPf1N	Unhealthy	Grotta_Vico	VC	White_Cave_Dweller	Cave	Ambient	P.ficiformis	No	Yes	PetrosiaVC	PF5	Bacteria	Proteobacteria	Alphaproteobacteria	Rhizobiales	Rhizobiales_Incertae_Sedis	Anderseniella	Genus: Anderseniella
9068790b834998716603ddb57015ad12	5	VcPf1N	Unhealthy	Grotta_Vico	VC	White_Cave_Dweller	Cave	Ambient	P.ficiformis	No	Yes	PetrosiaVC	PF5	Bacteria	Proteobacteria	Alphaproteobacteria	Rickettsiales	SM2D12	SM2D12	Genus: SM2D12
bd4147a1392bd1700a114468915a0ae1	5	VcPf1N	Unhealthy	Grotta_Vico	VC	White_Cave_Dweller	Cave	Ambient	P.ficiformis	No	Yes	PetrosiaVC	PF5	Bacteria	Proteobacteria	Alphaproteobacteria	Rhodospirillales	Order: Rhodospirillales	Order: Rhodospirillales	Order: Rhodospirillales
f79befb579d3c23dbf0dc58a2fcfa505	5	VcPf1N	Unhealthy	Grotta_Vico	VC	White_Cave_Dweller	Cave	Ambient	P.ficiformis	No	Yes	PetrosiaVC	PF5	Bacteria	Proteobacteria	Alphaproteobacteria	Rhizobiales	Devosiaceae	Maritalea	Genus: Maritalea
fbb0ba8f2221d055b80ef3cc663ad881	5	VcPf1N	Unhealthy	Grotta_Vico	VC	White_Cave_Dweller	Cave	Ambient	P.ficiformis	No	Yes	PetrosiaVC	PF5	Bacteria	Proteobacteria	Alphaproteobacteria	Micavibrionales	Micavibrionaceae	Family: Micavibrionaceae	Family: Micavibrionaceae
ff434d11189f78b7eb71cca39d611a49	5	VcPf1N	Unhealthy	Grotta_Vico	VC	White_Cave_Dweller	Cave	Ambient	P.ficiformis	No	Yes	PetrosiaVC	PF5	Bacteria	Proteobacteria	Alphaproteobacteria	Micavibrionales	Order: Micavibrionales	Order: Micavibrionales	Order: Micavibrionales
db1bac2e7bdde609fdf4fd26532c5830	5	VcPf1N	Unhealthy	Grotta_Vico	VC	White_Cave_Dweller	Cave	Ambient	P.ficiformis	No	Yes	PetrosiaVC	PF5	Bacteria	Spirochaetota	Spirochaetia	Spirochaetales	Spirochaetaceae	Spirochaeta_2	Genus: Spirochaeta_2
28a15307cf7b988df2ad1b5e13b32a46	5	VcPf1N	Unhealthy	Grotta_Vico	VC	White_Cave_Dweller	Cave	Ambient	P.ficiformis	No	Yes	PetrosiaVC	PF5	Bacteria	Verrucomicrobiota	Verrucomicrobiae	Verrucomicrobiales	Rubritaleaceae	Rubritalea	Genus: Rubritalea
85f72f312b6ced96a68e9cce2fdaf2c9	4	VcPf1N	Unhealthy	Grotta_Vico	VC	White_Cave_Dweller	Cave	Ambient	P.ficiformis	No	Yes	PetrosiaVC	PF5	Bacteria	Acidobacteriota	Acidobacteriae	PAUC26f	PAUC26f	PAUC26f	Genus: PAUC26f
1e534d2c06fb3e5912c4400b1d66bc5c	4	VcPf1N	Unhealthy	Grotta_Vico	VC	White_Cave_Dweller	Cave	Ambient	P.ficiformis	No	Yes	PetrosiaVC	PF5	Bacteria	Actinobacteriota	Acidimicrobiia	Microtrichales	Microtrichaceae	Sva0996_group	Genus: Sva0996_group
ba2d528429a9b36b1b3ef10acd521678	4	VcPf1N	Unhealthy	Grotta_Vico	VC	White_Cave_Dweller	Cave	Ambient	P.ficiformis	No	Yes	PetrosiaVC	PF5	Bacteria	Bacteroidota	Bacteroidia	Flavobacteriales	Cryomorphaceae	Family: Cryomorphaceae	Family: Cryomorphaceae
54745cc9532da01a0d7bd3c3de82ac37	4	VcPf1N	Unhealthy	Grotta_Vico	VC	White_Cave_Dweller	Cave	Ambient	P.ficiformis	No	Yes	PetrosiaVC	PF5	Bacteria	Bdellovibrionota	Bdellovibrionia	Bacteriovoracales	Bacteriovoracaceae	Peredibacter	Genus: Peredibacter
985bd901ea782b8d653ce1d42617133d	4	VcPf1N	Unhealthy	Grotta_Vico	VC	White_Cave_Dweller	Cave	Ambient	P.ficiformis	No	Yes	PetrosiaVC	PF5	Bacteria	Bdellovibrionota	Oligoflexia	0319-6G20	0319-6G20	0319-6G20	Genus: 0319-6G20
c4891fb20f6dea8824a8860939ff63c9	4	VcPf1N	Unhealthy	Grotta_Vico	VC	White_Cave_Dweller	Cave	Ambient	P.ficiformis	No	Yes	PetrosiaVC	PF5	Bacteria	Bdellovibrionota	Bdellovibrionia	Bdellovibrionales	Bdellovibrionaceae	Bdellovibrio	Genus: Bdellovibrio
ac81fc94275a0507fd36f8534b18d4e0	4	VcPf1N	Unhealthy	Grotta_Vico	VC	White_Cave_Dweller	Cave	Ambient	P.ficiformis	No	Yes	PetrosiaVC	PF5	Bacteria	Chloroflexi	Dehalococcoidia	S085	S085	S085	Genus: S085
a19fb159dc0fda7f85c4e82826336c9a	4	VcPf1N	Unhealthy	Grotta_Vico	VC	White_Cave_Dweller	Cave	Ambient	P.ficiformis	No	Yes	PetrosiaVC	PF5	Bacteria	Cyanobacteria	Sericytochromatia	Sericytochromatia	Sericytochromatia	Sericytochromatia	Genus: Sericytochromatia
c652a42a7eaebee43a5d83a784776f9d	4	VcPf1N	Unhealthy	Grotta_Vico	VC	White_Cave_Dweller	Cave	Ambient	P.ficiformis	No	Yes	PetrosiaVC	PF5	Bacteria	Desulfobacterota	Desulfuromonadia	Bradymonadales	Bradymonadales	Bradymonadales	Genus: Bradymonadales
c7f8172639e1dbb0363194810863201a	4	VcPf1N	Unhealthy	Grotta_Vico	VC	White_Cave_Dweller	Cave	Ambient	P.ficiformis	No	Yes	PetrosiaVC	PF5	Bacteria	Desulfobacterota	Desulfobacteria	Desulfobacterales	Desulfolunaceae	Desulfofaba	Genus: Desulfofaba
6e21769d5c86aa87681f79e57307331d	4	VcPf1N	Unhealthy	Grotta_Vico	VC	White_Cave_Dweller	Cave	Ambient	P.ficiformis	No	Yes	PetrosiaVC	PF5	Bacteria	Firmicutes	Bacilli	Izemoplasmatales	Izemoplasmatales	Izemoplasmatales	Genus: Izemoplasmatales
0d0ab9481005f5bf25b0bf9fb0bf22b1	4	VcPf1N	Unhealthy	Grotta_Vico	VC	White_Cave_Dweller	Cave	Ambient	P.ficiformis	No	Yes	PetrosiaVC	PF5	Bacteria	Patescibacteria	Gracilibacteria	Gracilibacteria	Gracilibacteria	Gracilibacteria	Genus: Gracilibacteria
f9d9e29076c36ded1658379abf3b575e	4	VcPf1N	Unhealthy	Grotta_Vico	VC	White_Cave_Dweller	Cave	Ambient	P.ficiformis	No	Yes	PetrosiaVC	PF5	Bacteria	Patescibacteria	Gracilibacteria	Absconditabacteriales_(SR1)	Absconditabacteriales_(SR1)	Absconditabacteriales_(SR1)	Genus: Absconditabacteriales_(SR1)
235f026b74c04b019a7f71984b2dd2d1	4	VcPf1N	Unhealthy	Grotta_Vico	VC	White_Cave_Dweller	Cave	Ambient	P.ficiformis	No	Yes	PetrosiaVC	PF5	Bacteria	Planctomycetota	Phycisphaerae	MSBL9	SG8-4	SG8-4	Genus: SG8-4
77fdc14d3c505e0febea50ea74582855	4	VcPf1N	Unhealthy	Grotta_Vico	VC	White_Cave_Dweller	Cave	Ambient	P.ficiformis	No	Yes	PetrosiaVC	PF5	Bacteria	Planctomycetota	Phycisphaerae	MSBL9	SG8-4	SG8-4	Genus: SG8-4
9294c0b19826440937d6fe5d72e158b4	4	VcPf1N	Unhealthy	Grotta_Vico	VC	White_Cave_Dweller	Cave	Ambient	P.ficiformis	No	Yes	PetrosiaVC	PF5	Bacteria	Planctomycetota	Phycisphaerae	Phycisphaerales	Phycisphaeraceae	SM1A02	Genus: SM1A02
f0c603ad2fcbd8dd3754ae92285638f4	4	VcPf1N	Unhealthy	Grotta_Vico	VC	White_Cave_Dweller	Cave	Ambient	P.ficiformis	No	Yes	PetrosiaVC	PF5	Bacteria	Planctomycetota	Phycisphaerae	Phycisphaerales	Phycisphaeraceae	SM1A02	Genus: SM1A02
54b176fa7bed428d789dc658180234ae	4	VcPf1N	Unhealthy	Grotta_Vico	VC	White_Cave_Dweller	Cave	Ambient	P.ficiformis	No	Yes	PetrosiaVC	PF5	Bacteria	Proteobacteria	Gammaproteobacteria	Ectothiorhodospirales	Ectothiorhodospiraceae	Family: Ectothiorhodospiraceae	Family: Ectothiorhodospiraceae
9a2262aa4bad1db2d696b9b4c60de17f	4	VcPf1N	Unhealthy	Grotta_Vico	VC	White_Cave_Dweller	Cave	Ambient	P.ficiformis	No	Yes	PetrosiaVC	PF5	Bacteria	Proteobacteria	Gammaproteobacteria	Thiomicrospirales	Thiomicrospiraceae	Family: Thiomicrospiraceae	Family: Thiomicrospiraceae
b2e6ca4ac01fb59ed0625929184ab207	4	VcPf1N	Unhealthy	Grotta_Vico	VC	White_Cave_Dweller	Cave	Ambient	P.ficiformis	No	Yes	PetrosiaVC	PF5	Bacteria	Proteobacteria	Gammaproteobacteria	Chromatiales	Sedimenticolaceae	Family: Sedimenticolaceae	Family: Sedimenticolaceae
b4d24f17c096544740dc9bdb5fc14e1e	4	VcPf1N	Unhealthy	Grotta_Vico	VC	White_Cave_Dweller	Cave	Ambient	P.ficiformis	No	Yes	PetrosiaVC	PF5	Bacteria	Proteobacteria	Alphaproteobacteria	Class: Alphaproteobacteria	Class: Alphaproteobacteria	Class: Alphaproteobacteria	Class: Alphaproteobacteria
bc0081bcd0a218f25c8d28c7a0c66b2a	4	VcPf1N	Unhealthy	Grotta_Vico	VC	White_Cave_Dweller	Cave	Ambient	P.ficiformis	No	Yes	PetrosiaVC	PF5	Bacteria	Proteobacteria	Gammaproteobacteria	Beggiatoales	Beggiatoaceae	Family: Beggiatoaceae	Family: Beggiatoaceae
d8d2e58991b99cdebfdd0af68a04a0ca	4	VcPf1N	Unhealthy	Grotta_Vico	VC	White_Cave_Dweller	Cave	Ambient	P.ficiformis	No	Yes	PetrosiaVC	PF5	Bacteria	Spirochaetota	Spirochaetia	Spirochaetales	Spirochaetaceae	Sediminispirochaeta	Genus: Sediminispirochaeta
67d32d9ad1b8d9919894a6b554d0742f	3	VcPf1N	Unhealthy	Grotta_Vico	VC	White_Cave_Dweller	Cave	Ambient	P.ficiformis	No	Yes	PetrosiaVC	PF5	Bacteria	Acidobacteriota	Thermoanaerobaculia	Thermoanaerobaculales	Thermoanaerobaculaceae	Sub10	Genus: Sub10
38d3ebf49285106a28e6733ebc567bcb	3	VcPf1N	Unhealthy	Grotta_Vico	VC	White_Cave_Dweller	Cave	Ambient	P.ficiformis	No	Yes	PetrosiaVC	PF5	Bacteria	Bacteroidota	Bacteroidia	Chitinophagales	Saprospiraceae	Family: Saprospiraceae	Family: Saprospiraceae
986be96872d4fc428783c3971a918a9f	3	VcPf1N	Unhealthy	Grotta_Vico	VC	White_Cave_Dweller	Cave	Ambient	P.ficiformis	No	Yes	PetrosiaVC	PF5	Bacteria	Bacteroidota	Bacteroidia	Chitinophagales	Saprospiraceae	Family: Saprospiraceae	Family: Saprospiraceae
b580704d6e344db25e3ae3dc0cdff1fd	3	VcPf1N	Unhealthy	Grotta_Vico	VC	White_Cave_Dweller	Cave	Ambient	P.ficiformis	No	Yes	PetrosiaVC	PF5	Bacteria	Bacteroidota	Bacteroidia	Flavobacteriales	Cryomorphaceae	Family: Cryomorphaceae	Family: Cryomorphaceae
b6af416f9b356b73cc97a5d153a33c19	3	VcPf1N	Unhealthy	Grotta_Vico	VC	White_Cave_Dweller	Cave	Ambient	P.ficiformis	No	Yes	PetrosiaVC	PF5	Bacteria	Bacteroidota	Kapabacteria	Kapabacteriales	Kapabacteriales	Kapabacteriales	Genus: Kapabacteriales
e02cb66c82e0d87bd2f46c8a59e31f0f	3	VcPf1N	Unhealthy	Grotta_Vico	VC	White_Cave_Dweller	Cave	Ambient	P.ficiformis	No	Yes	PetrosiaVC	PF5	Bacteria	Bacteroidota	Bacteroidia	Chitinophagales	Order: Chitinophagales	Order: Chitinophagales	Order: Chitinophagales
76d078bfd46fb6871c223a26d638e637	3	VcPf1N	Unhealthy	Grotta_Vico	VC	White_Cave_Dweller	Cave	Ambient	P.ficiformis	No	Yes	PetrosiaVC	PF5	Bacteria	Bdellovibrionota	Bdellovibrionia	Bdellovibrionales	Bdellovibrionaceae	OM27_clade	Genus: OM27_clade
e72c377718ea684e16f062345f8889cb	3	VcPf1N	Unhealthy	Grotta_Vico	VC	White_Cave_Dweller	Cave	Ambient	P.ficiformis	No	Yes	PetrosiaVC	PF5	Bacteria	Bdellovibrionota	Bdellovibrionia	Bdellovibrionales	Bdellovibrionaceae	Bdellovibrio	Genus: Bdellovibrio
1a93a60b95129ab6c78109b9ad2c166f	3	VcPf1N	Unhealthy	Grotta_Vico	VC	White_Cave_Dweller	Cave	Ambient	P.ficiformis	No	Yes	PetrosiaVC	PF5	Bacteria	Kingdom: Bacteria	Kingdom: Bacteria	Kingdom: Bacteria	Kingdom: Bacteria	Kingdom: Bacteria	Kingdom: Bacteria
ea82c8c6cabbab5cad780c29146746e6	3	VcPf1N	Unhealthy	Grotta_Vico	VC	White_Cave_Dweller	Cave	Ambient	P.ficiformis	No	Yes	PetrosiaVC	PF5	Bacteria	Myxococcota	Myxococcia	Myxococcales	Myxococcaceae	P3OB-42	Genus: P3OB-42
2bcb552a721a9a45413ce7f6a1496734	3	VcPf1N	Unhealthy	Grotta_Vico	VC	White_Cave_Dweller	Cave	Ambient	P.ficiformis	No	Yes	PetrosiaVC	PF5	Bacteria	Planctomycetota	Planctomycetes	Pirellulales	Pirellulaceae	Rhodopirellula	Genus: Rhodopirellula
75576b7ccf3cfa2630c7d6bc5777d81b	3	VcPf1N	Unhealthy	Grotta_Vico	VC	White_Cave_Dweller	Cave	Ambient	P.ficiformis	No	Yes	PetrosiaVC	PF5	Bacteria	Planctomycetota	Planctomycetes	Planctomycetales	Gimesiaceae	Family: Gimesiaceae	Family: Gimesiaceae
f4ccf774311cbadf705cbeedee46a38c	3	VcPf1N	Unhealthy	Grotta_Vico	VC	White_Cave_Dweller	Cave	Ambient	P.ficiformis	No	Yes	PetrosiaVC	PF5	Bacteria	Planctomycetota	Phycisphaerae	Phycisphaerales	Phycisphaeraceae	Family: Phycisphaeraceae	Family: Phycisphaeraceae
2e5f3c8952fcb54a7cfb7d1ec88de766	3	VcPf1N	Unhealthy	Grotta_Vico	VC	White_Cave_Dweller	Cave	Ambient	P.ficiformis	No	Yes	PetrosiaVC	PF5	Bacteria	Proteobacteria	Alphaproteobacteria	Rickettsiales	SM2D12	SM2D12	Genus: SM2D12
466a7fe2a7b3f2d05c8ef3dca9fddc1c	3	VcPf1N	Unhealthy	Grotta_Vico	VC	White_Cave_Dweller	Cave	Ambient	P.ficiformis	No	Yes	PetrosiaVC	PF5	Bacteria	Proteobacteria	Gammaproteobacteria	Pseudomonadales	Spongiibacteraceae	BD1-7_clade	Genus: BD1-7_clade
6b8991bd2271f5d06bc9d1fb4b71b7cc	3	VcPf1N	Unhealthy	Grotta_Vico	VC	White_Cave_Dweller	Cave	Ambient	P.ficiformis	No	Yes	PetrosiaVC	PF5	Bacteria	Proteobacteria	Alphaproteobacteria	Rickettsiales	Rickettsiaceae	Candidatus_Trichorickettsia	Candidatus_Trichorickettsia
6bf5601bdafff531f67847fd2fbc7ee3	3	VcPf1N	Unhealthy	Grotta_Vico	VC	White_Cave_Dweller	Cave	Ambient	P.ficiformis	No	Yes	PetrosiaVC	PF5	Bacteria	Proteobacteria	Gammaproteobacteria	Burkholderiales	Burkholderiaceae	Limnobacter	Genus: Limnobacter
92e9a90331ed03b3e1b900310c513303	3	VcPf1N	Unhealthy	Grotta_Vico	VC	White_Cave_Dweller	Cave	Ambient	P.ficiformis	No	Yes	PetrosiaVC	PF5	Bacteria	Proteobacteria	Alphaproteobacteria	Rhodospirillales	Order: Rhodospirillales	Order: Rhodospirillales	Order: Rhodospirillales
bc578314532e5091f419d88b3038c5da	3	VcPf1N	Unhealthy	Grotta_Vico	VC	White_Cave_Dweller	Cave	Ambient	P.ficiformis	No	Yes	PetrosiaVC	PF5	Bacteria	Proteobacteria	Gammaproteobacteria	Tenderiales	Tenderiaceae	Candidatus_Tenderia	Genus: Candidatus_Tenderia
bcf2396eadeb61955649d5e3b17dedc9	3	VcPf1N	Unhealthy	Grotta_Vico	VC	White_Cave_Dweller	Cave	Ambient	P.ficiformis	No	Yes	PetrosiaVC	PF5	Bacteria	Verrucomicrobiota	Chlamydiae	Chlamydiales	Criblamydiaceae	Criblamydiaceae	Genus: Criblamydiaceae
5a2e587ac3fc8064fe70bb3592c72f69	2	VcPf1N	Unhealthy	Grotta_Vico	VC	White_Cave_Dweller	Cave	Ambient	P.ficiformis	No	Yes	PetrosiaVC	PF5	Bacteria	Acidobacteriota	Sub11	Sub11	Sub11	Sub11	Genus: Sub11
3b9f5c1a7a73c61ecfeafdf59f28ac9a	2	VcPf1N	Unhealthy	Grotta_Vico	VC	White_Cave_Dweller	Cave	Ambient	P.ficiformis	No	Yes	PetrosiaVC	PF5	Bacteria	Cloacimonadota	Cloacimonadia	Cloacimonadales	LK-44f	LK-44f	Genus: LK-44f
185f6a2c551326dcc128d68aec4f5a14	2	VcPf1N	Unhealthy	Grotta_Vico	VC	White_Cave_Dweller	Cave	Ambient	P.ficiformis	No	Yes	PetrosiaVC	PF5	Bacteria	Firmicutes	Moorellia	Desulfitibacterales	Desulfitibacteraceae	Desulfitibacter	Genus: Desulfitibacter
8ff8bb682e97739b8190113c904eab2b	2	VcPf1N	Unhealthy	Grotta_Vico	VC	White_Cave_Dweller	Cave	Ambient	P.ficiformis	No	Yes	PetrosiaVC	PF5	Bacteria	Kingdom: Bacteria	Kingdom: Bacteria	Kingdom: Bacteria	Kingdom: Bacteria	Kingdom: Bacteria	Kingdom: Bacteria
908d72a36702960c40b1fe7b1b42660c	2	VcPf1N	Unhealthy	Grotta_Vico	VC	White_Cave_Dweller	Cave	Ambient	P.ficiformis	No	Yes	PetrosiaVC	PF5	Bacteria	Planctomycetota	OM190	OM190	OM190	OM190	Genus: OM190
d2c239018a5e3355b4e2737633240154	2	VcPf1N	Unhealthy	Grotta_Vico	VC	White_Cave_Dweller	Cave	Ambient	P.ficiformis	No	Yes	PetrosiaVC	PF5	Bacteria	Planctomycetota	OM190	OM190	OM190	OM190	Genus: OM190
5084222b7d2e21da3c64d11b63494bc4	2	VcPf1N	Unhealthy	Grotta_Vico	VC	White_Cave_Dweller	Cave	Ambient	P.ficiformis	No	Yes	PetrosiaVC	PF5	Bacteria	Poribacteria	Poribacteria	Poribacteria	Poribacteria	Poribacteria	Genus: Poribacteria
944ad7eadddab3f01183dc5dc54008a4	2	VcPf1N	Unhealthy	Grotta_Vico	VC	White_Cave_Dweller	Cave	Ambient	P.ficiformis	No	Yes	PetrosiaVC	PF5	Bacteria	Proteobacteria	Gammaproteobacteria	Pseudomonadales	Cellvibrionaceae	Pseudoteredinibacter	Genus: Pseudoteredinibacter
96fff8433b0893b75817719dc0d1989f	2	VcPf1N	Unhealthy	Grotta_Vico	VC	White_Cave_Dweller	Cave	Ambient	P.ficiformis	No	Yes	PetrosiaVC	PF5	Bacteria	Proteobacteria	Alphaproteobacteria	Caulobacterales	Parvularculaceae	Parvularcula	Genus: Parvularcula
003c68cb2dc6ceaf18fe69878247be67	0	VcPf1N	Unhealthy	Grotta_Vico	VC	White_Cave_Dweller	Cave	Ambient	P.ficiformis	No	Yes	PetrosiaVC	PF5	Bacteria	Acidobacteriota	Vicinamibacteria	Sub9	Sub9	Sub9	Genus: Sub9
0577d3be62044d71a9967e318b3eebb0	0	VcPf1N	Unhealthy	Grotta_Vico	VC	White_Cave_Dweller	Cave	Ambient	P.ficiformis	No	Yes	PetrosiaVC	PF5	Bacteria	Acidobacteriota	Thermoanaerobaculia	Thermoanaerobaculales	Thermoanaerobaculaceae	Sub10	Holophaga_sp.
06d518ff70170c05886746b016b2eded	0	VcPf1N	Unhealthy	Grotta_Vico	VC	White_Cave_Dweller	Cave	Ambient	P.ficiformis	No	Yes	PetrosiaVC	PF5	Bacteria	Acidobacteriota	Vicinamibacteria	Vicinamibacterales	Order: Vicinamibacterales	Order: Vicinamibacterales	Order: Vicinamibacterales
09aeb555d87e97f8cce20c9c0fc9d72f	0	VcPf1N	Unhealthy	Grotta_Vico	VC	White_Cave_Dweller	Cave	Ambient	P.ficiformis	No	Yes	PetrosiaVC	PF5	Bacteria	Acidobacteriota	Thermoanaerobaculia	Thermoanaerobaculales	Thermoanaerobaculaceae	Sub10	Genus: Sub10
1057ab092bfdf8881841b0ec031dec06	0	VcPf1N	Unhealthy	Grotta_Vico	VC	White_Cave_Dweller	Cave	Ambient	P.ficiformis	No	Yes	PetrosiaVC	PF5	Bacteria	Acidobacteriota	Vicinamibacteria	Sub9	Sub9	Sub9	Genus: Sub9
1c8e0d79f0994039ead2a4376f7f12f5	0	VcPf1N	Unhealthy	Grotta_Vico	VC	White_Cave_Dweller	Cave	Ambient	P.ficiformis	No	Yes	PetrosiaVC	PF5	Bacteria	Acidobacteriota	Sub5	Sub5	Sub5	Sub5	Genus: Sub5
2845e3a98b1e8b0c4933259657c63aa2	0	VcPf1N	Unhealthy	Grotta_Vico	VC	White_Cave_Dweller	Cave	Ambient	P.ficiformis	No	Yes	PetrosiaVC	PF5	Bacteria	Acidobacteriota	Vicinamibacteria	Vicinamibacterales	Order: Vicinamibacterales	Order: Vicinamibacterales	Order: Vicinamibacterales
2f58baf2040ce8b9dcfe7d29f69ce8a9	0	VcPf1N	Unhealthy	Grotta_Vico	VC	White_Cave_Dweller	Cave	Ambient	P.ficiformis	No	Yes	PetrosiaVC	PF5	Bacteria	Acidobacteriota	Acidobacteriae	PAUC26f	PAUC26f	PAUC26f	Genus: PAUC26f
363e81073441d99c416cb52ad9f1a011	0	VcPf1N	Unhealthy	Grotta_Vico	VC	White_Cave_Dweller	Cave	Ambient	P.ficiformis	No	Yes	PetrosiaVC	PF5	Bacteria	Acidobacteriota	Vicinamibacteria	Sub9	Sub9	Sub9	Genus: Sub9
42af8767a4651177ca079ea6529f0e5b	0	VcPf1N	Unhealthy	Grotta_Vico	VC	White_Cave_Dweller	Cave	Ambient	P.ficiformis	No	Yes	PetrosiaVC	PF5	Bacteria	Acidobacteriota	Vicinamibacteria	Vicinamibacterales	Order: Vicinamibacterales	Order: Vicinamibacterales	Order: Vicinamibacterales
43162c821bcfbbc08e592001f4e6f304	0	VcPf1N	Unhealthy	Grotta_Vico	VC	White_Cave_Dweller	Cave	Ambient	P.ficiformis	No	Yes	PetrosiaVC	PF5	Bacteria	Acidobacteriota	Acidobacteriae	Sub15	Sub15	Sub15	Genus: Sub15
493f2c723654bf8e113b2882142d38b0	0	VcPf1N	Unhealthy	Grotta_Vico	VC	White_Cave_Dweller	Cave	Ambient	P.ficiformis	No	Yes	PetrosiaVC	PF5	Bacteria	Acidobacteriota	Vicinamibacteria	Vicinamibacterales	Order: Vicinamibacterales	Order: Vicinamibacterales	Order: Vicinamibacterales
4c31d6515474234ca32b8c4ba923f87a	0	VcPf1N	Unhealthy	Grotta_Vico	VC	White_Cave_Dweller	Cave	Ambient	P.ficiformis	No	Yes	PetrosiaVC	PF5	Bacteria	Acidobacteriota	Vicinamibacteria	Vicinamibacterales	Order: Vicinamibacterales	Order: Vicinamibacterales	Order: Vicinamibacterales
4e1c10ab1501fe646025a24fe8f6bfc0	0	VcPf1N	Unhealthy	Grotta_Vico	VC	White_Cave_Dweller	Cave	Ambient	P.ficiformis	No	Yes	PetrosiaVC	PF5	Bacteria	Acidobacteriota	Vicinamibacteria	Sub9	Sub9	Sub9	Genus: Sub9
6b500b782f42c0d35daa56a0888d1c56	0	VcPf1N	Unhealthy	Grotta_Vico	VC	White_Cave_Dweller	Cave	Ambient	P.ficiformis	No	Yes	PetrosiaVC	PF5	Bacteria	Acidobacteriota	Acidobacteriae	PAUC26f	PAUC26f	PAUC26f	Genus: PAUC26f
7be2632751b6fce52f846e031c9b99b4	0	VcPf1N	Unhealthy	Grotta_Vico	VC	White_Cave_Dweller	Cave	Ambient	P.ficiformis	No	Yes	PetrosiaVC	PF5	Bacteria	Acidobacteriota	Acidobacteriae	PAUC26f	PAUC26f	PAUC26f	Genus: PAUC26f
7fe8a98b8b157c17538c99d35dcdc214	0	VcPf1N	Unhealthy	Grotta_Vico	VC	White_Cave_Dweller	Cave	Ambient	P.ficiformis	No	Yes	PetrosiaVC	PF5	Bacteria	Acidobacteriota	Vicinamibacteria	Vicinamibacterales	Order: Vicinamibacterales	Order: Vicinamibacterales	Order: Vicinamibacterales
8071b4155c073f7b4b3f78ee2d329b78	0	VcPf1N	Unhealthy	Grotta_Vico	VC	White_Cave_Dweller	Cave	Ambient	P.ficiformis	No	Yes	PetrosiaVC	PF5	Bacteria	Acidobacteriota	Acidobacteriae	PAUC26f	PAUC26f	PAUC26f	Genus: PAUC26f
863382f82e439c69fba5f72df01794b8	0	VcPf1N	Unhealthy	Grotta_Vico	VC	White_Cave_Dweller	Cave	Ambient	P.ficiformis	No	Yes	PetrosiaVC	PF5	Bacteria	Acidobacteriota	Vicinamibacteria	Vicinamibacterales	Order: Vicinamibacterales	Order: Vicinamibacterales	Order: Vicinamibacterales
9300cf5bfaf3e96b3307fdd2b69ec582	0	VcPf1N	Unhealthy	Grotta_Vico	VC	White_Cave_Dweller	Cave	Ambient	P.ficiformis	No	Yes	PetrosiaVC	PF5	Bacteria	Acidobacteriota	Sub5	Sub5	Sub5	Sub5	Genus: Sub5
a0767ad8c3e742a978e4d7277ddfdab0	0	VcPf1N	Unhealthy	Grotta_Vico	VC	White_Cave_Dweller	Cave	Ambient	P.ficiformis	No	Yes	PetrosiaVC	PF5	Bacteria	Acidobacteriota	Holophagae	Acanthopleuribacterales	Acanthopleuribacteraceae	Acanthopleuribacter	Genus: Acanthopleuribacter
a49019e450fab3d7066d19182fbcfca5	0	VcPf1N	Unhealthy	Grotta_Vico	VC	White_Cave_Dweller	Cave	Ambient	P.ficiformis	No	Yes	PetrosiaVC	PF5	Bacteria	Acidobacteriota	Vicinamibacteria	Vicinamibacterales	Order: Vicinamibacterales	Order: Vicinamibacterales	Order: Vicinamibacterales
b1235f905c8beb83bd61d0a3427a1c04	0	VcPf1N	Unhealthy	Grotta_Vico	VC	White_Cave_Dweller	Cave	Ambient	P.ficiformis	No	Yes	PetrosiaVC	PF5	Bacteria	Acidobacteriota	Vicinamibacteria	Sub9	Sub9	Sub9	Genus: Sub9
c3a426b285ac1d04ef66f01d59891e1f	0	VcPf1N	Unhealthy	Grotta_Vico	VC	White_Cave_Dweller	Cave	Ambient	P.ficiformis	No	Yes	PetrosiaVC	PF5	Bacteria	Acidobacteriota	Acidobacteriae	PAUC26f	PAUC26f	PAUC26f	Genus: PAUC26f
c4e496cf95ebf43e5d031cec65d5fb43	0	VcPf1N	Unhealthy	Grotta_Vico	VC	White_Cave_Dweller	Cave	Ambient	P.ficiformis	No	Yes	PetrosiaVC	PF5	Bacteria	Acidobacteriota	Sub5	Sub5	Sub5	Sub5	Genus: Sub5
cba8799a2aa0da42eb06e3e752a391b6	0	VcPf1N	Unhealthy	Grotta_Vico	VC	White_Cave_Dweller	Cave	Ambient	P.ficiformis	No	Yes	PetrosiaVC	PF5	Bacteria	Acidobacteriota	Vicinamibacteria	Vicinamibacterales	Order: Vicinamibacterales	Order: Vicinamibacterales	Order: Vicinamibacterales
dffb6bfd3ef42522a027de8f75e79a07	0	VcPf1N	Unhealthy	Grotta_Vico	VC	White_Cave_Dweller	Cave	Ambient	P.ficiformis	No	Yes	PetrosiaVC	PF5	Bacteria	Acidobacteriota	Acidobacteriae	PAUC26f	PAUC26f	PAUC26f	Genus: PAUC26f
f25143a522db6e2446e4fae9dae92627	0	VcPf1N	Unhealthy	Grotta_Vico	VC	White_Cave_Dweller	Cave	Ambient	P.ficiformis	No	Yes	PetrosiaVC	PF5	Bacteria	Acidobacteriota	Vicinamibacteria	Sub9	Sub9	Sub9	Genus: Sub9
f30e754cf92d3b27a58800ac56709758	0	VcPf1N	Unhealthy	Grotta_Vico	VC	White_Cave_Dweller	Cave	Ambient	P.ficiformis	No	Yes	PetrosiaVC	PF5	Bacteria	Acidobacteriota	Vicinamibacteria	Vicinamibacterales	Order: Vicinamibacterales	Order: Vicinamibacterales	Order: Vicinamibacterales
f8c2578000e8d8783bdf16642fb4c705	0	VcPf1N	Unhealthy	Grotta_Vico	VC	White_Cave_Dweller	Cave	Ambient	P.ficiformis	No	Yes	PetrosiaVC	PF5	Bacteria	Acidobacteriota	Sub21	Sub21	Sub21	Sub21	Genus: Sub21
f8fc3664ddbc5fcc215512b44d3829af	0	VcPf1N	Unhealthy	Grotta_Vico	VC	White_Cave_Dweller	Cave	Ambient	P.ficiformis	No	Yes	PetrosiaVC	PF5	Bacteria	Acidobacteriota	Vicinamibacteria	Vicinamibacterales	Order: Vicinamibacterales	Order: Vicinamibacterales	Order: Vicinamibacterales
074bf12dd44f198ddd7701c7545af2cc	0	VcPf1N	Unhealthy	Grotta_Vico	VC	White_Cave_Dweller	Cave	Ambient	P.ficiformis	No	Yes	PetrosiaVC	PF5	Bacteria	Actinobacteriota	Acidimicrobiia	Actinomarinales	Order: Actinomarinales	Order: Actinomarinales	Order: Actinomarinales
2d6931c11e5d8a6e511b120b16b546cf	0	VcPf1N	Unhealthy	Grotta_Vico	VC	White_Cave_Dweller	Cave	Ambient	P.ficiformis	No	Yes	PetrosiaVC	PF5	Bacteria	Actinobacteriota	Acidimicrobiia	Microtrichales	Microtrichaceae	Sva0996_group	Genus: Sva0996_group
32f0e4f0c9cfd4622c39142602c550a2	0	VcPf1N	Unhealthy	Grotta_Vico	VC	White_Cave_Dweller	Cave	Ambient	P.ficiformis	No	Yes	PetrosiaVC	PF5	Bacteria	Actinobacteriota	Acidimicrobiia	Microtrichales	Ilumatobacteraceae	Ilumatobacter	Genus: Ilumatobacter
36d7c62a00f329e190ea639168d83c02	0	VcPf1N	Unhealthy	Grotta_Vico	VC	White_Cave_Dweller	Cave	Ambient	P.ficiformis	No	Yes	PetrosiaVC	PF5	Bacteria	Actinobacteriota	Acidimicrobiia	Actinomarinales	Order: Actinomarinales	Order: Actinomarinales	Order: Actinomarinales
51063be24315c9359337b9b161d50072	0	VcPf1N	Unhealthy	Grotta_Vico	VC	White_Cave_Dweller	Cave	Ambient	P.ficiformis	No	Yes	PetrosiaVC	PF5	Bacteria	Actinobacteriota	Acidimicrobiia	Microtrichales	Microtrichaceae	Sva0996_group	Genus: Sva0996_group
576bed340c06aa5a8514c003ddb82089	0	VcPf1N	Unhealthy	Grotta_Vico	VC	White_Cave_Dweller	Cave	Ambient	P.ficiformis	No	Yes	PetrosiaVC	PF5	Bacteria	Actinobacteriota	Acidimicrobiia	Microtrichales	Microtrichaceae	Sva0996_group	Genus: Sva0996_group
9026f5974564830f253bfd2c522c7036	0	VcPf1N	Unhealthy	Grotta_Vico	VC	White_Cave_Dweller	Cave	Ambient	P.ficiformis	No	Yes	PetrosiaVC	PF5	Bacteria	Actinobacteriota	Acidimicrobiia	Microtrichales	Microtrichaceae	Sva0996_group	Genus: Sva0996_group
938839fef9782fe98b1cd6521c60cc8c	0	VcPf1N	Unhealthy	Grotta_Vico	VC	White_Cave_Dweller	Cave	Ambient	P.ficiformis	No	Yes	PetrosiaVC	PF5	Bacteria	Actinobacteriota	Acidimicrobiia	Microtrichales	Microtrichaceae	Sva0996_group	Genus: Sva0996_group
a827fb2ba9dcc2e2876b07c9b2ddf248	0	VcPf1N	Unhealthy	Grotta_Vico	VC	White_Cave_Dweller	Cave	Ambient	P.ficiformis	No	Yes	PetrosiaVC	PF5	Bacteria	Actinobacteriota	Acidimicrobiia	Actinomarinales	Order: Actinomarinales	Order: Actinomarinales	Order: Actinomarinales
b11e746055b3692569dac165ecf828e9	0	VcPf1N	Unhealthy	Grotta_Vico	VC	White_Cave_Dweller	Cave	Ambient	P.ficiformis	No	Yes	PetrosiaVC	PF5	Bacteria	Actinobacteriota	Acidimicrobiia	Microtrichales	Microtrichaceae	Sva0996_group	Genus: Sva0996_group
bf7c48db5b7f62245f4e6507542ae90d	0	VcPf1N	Unhealthy	Grotta_Vico	VC	White_Cave_Dweller	Cave	Ambient	P.ficiformis	No	Yes	PetrosiaVC	PF5	Bacteria	Actinobacteriota	Acidimicrobiia	Microtrichales	Microtrichaceae	Sva0996_group	Genus: Sva0996_group
cc27ef32e222ece8037d5ec322865ed0	0	VcPf1N	Unhealthy	Grotta_Vico	VC	White_Cave_Dweller	Cave	Ambient	P.ficiformis	No	Yes	PetrosiaVC	PF5	Bacteria	Actinobacteriota	Acidimicrobiia	Microtrichales	Ilumatobacteraceae	Ilumatobacter	Genus: Ilumatobacter
cee8337dee329d4a6529d2cae60efab9	0	VcPf1N	Unhealthy	Grotta_Vico	VC	White_Cave_Dweller	Cave	Ambient	P.ficiformis	No	Yes	PetrosiaVC	PF5	Bacteria	Actinobacteriota	Acidimicrobiia	Microtrichales	Microtrichaceae	Sva0996_group	Genus: Sva0996_group
daa91ad840e0253ce73443a2ebbe4ad3	0	VcPf1N	Unhealthy	Grotta_Vico	VC	White_Cave_Dweller	Cave	Ambient	P.ficiformis	No	Yes	PetrosiaVC	PF5	Bacteria	Actinobacteriota	Acidimicrobiia	Microtrichales	Ilumatobacteraceae	Ilumatobacter	Genus: Ilumatobacter
e2708885f3eac845f72aabd39bdcbe72	0	VcPf1N	Unhealthy	Grotta_Vico	VC	White_Cave_Dweller	Cave	Ambient	P.ficiformis	No	Yes	PetrosiaVC	PF5	Bacteria	Actinobacteriota	Acidimicrobiia	Microtrichales	Microtrichaceae	Sva0996_group	Genus: Sva0996_group
f702aaccc944454762363f6857a8227a	0	VcPf1N	Unhealthy	Grotta_Vico	VC	White_Cave_Dweller	Cave	Ambient	P.ficiformis	No	Yes	PetrosiaVC	PF5	Bacteria	Actinobacteriota	Acidimicrobiia	Microtrichales	Microtrichaceae	Sva0996_group	Genus: Sva0996_group
546627ba3f2471e8f05ccfdb26c29d68	0	VcPf1N	Unhealthy	Grotta_Vico	VC	White_Cave_Dweller	Cave	Ambient	P.ficiformis	No	Yes	PetrosiaVC	PF5	Bacteria	AncK6	AncK6	AncK6	AncK6	AncK6	Genus: AncK6
020dac6299b27ac32da605dde8e01dae	0	VcPf1N	Unhealthy	Grotta_Vico	VC	White_Cave_Dweller	Cave	Ambient	P.ficiformis	No	Yes	PetrosiaVC	PF5	Bacteria	Bacteroidota	Bacteroidia	Bacteroidales	Prolixibacteraceae	Draconibacterium	Genus: Draconibacterium
024d018782334239c2e409400edd9d73	0	VcPf1N	Unhealthy	Grotta_Vico	VC	White_Cave_Dweller	Cave	Ambient	P.ficiformis	No	Yes	PetrosiaVC	PF5	Bacteria	Bacteroidota	Bacteroidia	Flavobacteriales	Cryomorphaceae	Family: Cryomorphaceae	Family: Cryomorphaceae
03319a53f3b4354307eedf50bd13dccf	0	VcPf1N	Unhealthy	Grotta_Vico	VC	White_Cave_Dweller	Cave	Ambient	P.ficiformis	No	Yes	PetrosiaVC	PF5	Bacteria	Bacteroidota	Bacteroidia	Chitinophagales	Saprospiraceae	Family: Saprospiraceae	Family: Saprospiraceae
0c33d672a7092eed787ac2901c714d87	0	VcPf1N	Unhealthy	Grotta_Vico	VC	White_Cave_Dweller	Cave	Ambient	P.ficiformis	No	Yes	PetrosiaVC	PF5	Bacteria	Bacteroidota	Bacteroidia	Sphingobacteriales	NS11-12_group	NS11-12_group	Genus: NS11-12_group
0e86df04041be0125d69c790d69cd435	0	VcPf1N	Unhealthy	Grotta_Vico	VC	White_Cave_Dweller	Cave	Ambient	P.ficiformis	No	Yes	PetrosiaVC	PF5	Bacteria	Bacteroidota	Bacteroidia	Flavobacteriales	Flavobacteriaceae	Family: Flavobacteriaceae	Family: Flavobacteriaceae
18fb8b69092c860ee614b760b259c70d	0	VcPf1N	Unhealthy	Grotta_Vico	VC	White_Cave_Dweller	Cave	Ambient	P.ficiformis	No	Yes	PetrosiaVC	PF5	Bacteria	Bacteroidota	Bacteroidia	Chitinophagales	Saprospiraceae	Family: Saprospiraceae	Family: Saprospiraceae
244c6c59ae435f0256819673cc871943	0	VcPf1N	Unhealthy	Grotta_Vico	VC	White_Cave_Dweller	Cave	Ambient	P.ficiformis	No	Yes	PetrosiaVC	PF5	Bacteria	Bacteroidota	Rhodothermia	Rhodothermales	Rhodothermaceae	Family: Rhodothermaceae	Family: Rhodothermaceae
27bbb43cf5b353fabf152aebf023e4b9	0	VcPf1N	Unhealthy	Grotta_Vico	VC	White_Cave_Dweller	Cave	Ambient	P.ficiformis	No	Yes	PetrosiaVC	PF5	Bacteria	Bacteroidota	Bacteroidia	Flavobacteriales	Cryomorphaceae	Family: Cryomorphaceae	Family: Cryomorphaceae
28455361c634f4ae33e3b765ce3fdfdd	0	VcPf1N	Unhealthy	Grotta_Vico	VC	White_Cave_Dweller	Cave	Ambient	P.ficiformis	No	Yes	PetrosiaVC	PF5	Bacteria	Bacteroidota	Bacteroidia	Flavobacteriales	Crocinitomicaceae	Crocinitomix	Genus: Crocinitomix
2e7e61d8ea7c1564b332ae6537e5b069	0	VcPf1N	Unhealthy	Grotta_Vico	VC	White_Cave_Dweller	Cave	Ambient	P.ficiformis	No	Yes	PetrosiaVC	PF5	Bacteria	Bacteroidota	Bacteroidia	Flavobacteriales	Schleiferiaceae	Schleiferia	Genus: Schleiferia
2fc40ce67eb65050c4e87c81687010a7	0	VcPf1N	Unhealthy	Grotta_Vico	VC	White_Cave_Dweller	Cave	Ambient	P.ficiformis	No	Yes	PetrosiaVC	PF5	Bacteria	Bacteroidota	Bacteroidia	Flavobacteriales	Flavobacteriaceae	Winogradskyella	Genus: Winogradskyella
2fdbf2cda6afea4e8323127c9a9d64b2	0	VcPf1N	Unhealthy	Grotta_Vico	VC	White_Cave_Dweller	Cave	Ambient	P.ficiformis	No	Yes	PetrosiaVC	PF5	Bacteria	Bacteroidota	Bacteroidia	Flavobacteriales	Cryomorphaceae	Family: Cryomorphaceae	Family: Cryomorphaceae
3b105dfd618ece18b31ea3ce3c436b0b	0	VcPf1N	Unhealthy	Grotta_Vico	VC	White_Cave_Dweller	Cave	Ambient	P.ficiformis	No	Yes	PetrosiaVC	PF5	Bacteria	Bacteroidota	Bacteroidia	Chitinophagales	Saprospiraceae	Family: Saprospiraceae	Family: Saprospiraceae
3b17a1a047ce74530e98bdfd6ec83409	0	VcPf1N	Unhealthy	Grotta_Vico	VC	White_Cave_Dweller	Cave	Ambient	P.ficiformis	No	Yes	PetrosiaVC	PF5	Bacteria	Bacteroidota	Kapabacteria	Kapabacteriales	Kapabacteriales	Kapabacteriales	Genus: Kapabacteriales
40c2b630e6829314f805e1d934951f02	0	VcPf1N	Unhealthy	Grotta_Vico	VC	White_Cave_Dweller	Cave	Ambient	P.ficiformis	No	Yes	PetrosiaVC	PF5	Bacteria	Bacteroidota	Rhodothermia	Rhodothermales	Rhodothermaceae	Family: Rhodothermaceae	Family: Rhodothermaceae
41cbb6440619fdb2de3fdbec960e9729	0	VcPf1N	Unhealthy	Grotta_Vico	VC	White_Cave_Dweller	Cave	Ambient	P.ficiformis	No	Yes	PetrosiaVC	PF5	Bacteria	Bacteroidota	Bacteroidia	Chitinophagales	Order: Chitinophagales	Order: Chitinophagales	Order: Chitinophagales
4874b3f22f245b579b8a879fb73c8440	0	VcPf1N	Unhealthy	Grotta_Vico	VC	White_Cave_Dweller	Cave	Ambient	P.ficiformis	No	Yes	PetrosiaVC	PF5	Bacteria	Bacteroidota	Bacteroidia	Chitinophagales	Order: Chitinophagales	Order: Chitinophagales	Order: Chitinophagales
4b88cc5e649a28ea0aff8969d9d03e6f	0	VcPf1N	Unhealthy	Grotta_Vico	VC	White_Cave_Dweller	Cave	Ambient	P.ficiformis	No	Yes	PetrosiaVC	PF5	Bacteria	Bacteroidota	Bacteroidia	Class: Bacteroidia	Class: Bacteroidia	Class: Bacteroidia	Class: Bacteroidia
4e4528337ee43b1b5d300e9d04a22d72	0	VcPf1N	Unhealthy	Grotta_Vico	VC	White_Cave_Dweller	Cave	Ambient	P.ficiformis	No	Yes	PetrosiaVC	PF5	Bacteria	Bacteroidota	Bacteroidia	Flavobacteriales	Cryomorphaceae	Family: Cryomorphaceae	Family: Cryomorphaceae
5da9a7caf12b007b8abcbb60c0e80c22	0	VcPf1N	Unhealthy	Grotta_Vico	VC	White_Cave_Dweller	Cave	Ambient	P.ficiformis	No	Yes	PetrosiaVC	PF5	Bacteria	Bacteroidota	Bacteroidia	Chitinophagales	Saprospiraceae	Rubidimonas	Genus: Rubidimonas
632e0a90094c4cc9b2d4a4f795e55a95	0	VcPf1N	Unhealthy	Grotta_Vico	VC	White_Cave_Dweller	Cave	Ambient	P.ficiformis	No	Yes	PetrosiaVC	PF5	Bacteria	Bacteroidota	Bacteroidia	Flavobacteriales	Cryomorphaceae	Owenweeksia	Genus: Owenweeksia
64e99d80e0a6672d03c621bc77c16256	0	VcPf1N	Unhealthy	Grotta_Vico	VC	White_Cave_Dweller	Cave	Ambient	P.ficiformis	No	Yes	PetrosiaVC	PF5	Bacteria	Bacteroidota	Bacteroidia	Flavobacteriales	Flavobacteriaceae	Polaribacter	Genus: Polaribacter
66ab91fc094e5a841825a7b583e49c75	0	VcPf1N	Unhealthy	Grotta_Vico	VC	White_Cave_Dweller	Cave	Ambient	P.ficiformis	No	Yes	PetrosiaVC	PF5	Bacteria	Bacteroidota	Bacteroidia	Chitinophagales	Saprospiraceae	Lewinella	Genus: Lewinella
6757793ba78c7bfd4d9da6c5915851ff	0	VcPf1N	Unhealthy	Grotta_Vico	VC	White_Cave_Dweller	Cave	Ambient	P.ficiformis	No	Yes	PetrosiaVC	PF5	Bacteria	Bacteroidota	Ignavibacteria	Ignavibacteriales	Melioribacteraceae	IheB3-7	Genus: IheB3-7
6d35cbbb2bb453f7a8065b0bb8488536	0	VcPf1N	Unhealthy	Grotta_Vico	VC	White_Cave_Dweller	Cave	Ambient	P.ficiformis	No	Yes	PetrosiaVC	PF5	Bacteria	Bacteroidota	Bacteroidia	Bacteroidales	Prolixibacteraceae	Sunxiuqinia	Sunxiuqinia_elliptica
72b715b41dcafdfed638ed99c73a2eda	0	VcPf1N	Unhealthy	Grotta_Vico	VC	White_Cave_Dweller	Cave	Ambient	P.ficiformis	No	Yes	PetrosiaVC	PF5	Bacteria	Bacteroidota	Bacteroidia	Sphingobacteriales	NS11-12_group	NS11-12_group	Genus: NS11-12_group
79c8a225911436184028dd3364e0fc40	0	VcPf1N	Unhealthy	Grotta_Vico	VC	White_Cave_Dweller	Cave	Ambient	P.ficiformis	No	Yes	PetrosiaVC	PF5	Bacteria	Bacteroidota	Bacteroidia	Chitinophagales	Saprospiraceae	Family: Saprospiraceae	Family: Saprospiraceae
83a47f631aee4b632233224809abec6a	0	VcPf1N	Unhealthy	Grotta_Vico	VC	White_Cave_Dweller	Cave	Ambient	P.ficiformis	No	Yes	PetrosiaVC	PF5	Bacteria	Bacteroidota	Bacteroidia	Bacteroidales	Bacteroidetes_BD2-2	Bacteroidetes_BD2-2	Genus: Bacteroidetes_BD2-2
8dbc21f6ed04a530d6a283c3b2f57f09	0	VcPf1N	Unhealthy	Grotta_Vico	VC	White_Cave_Dweller	Cave	Ambient	P.ficiformis	No	Yes	PetrosiaVC	PF5	Bacteria	Bacteroidota	Bacteroidia	Flavobacteriales	Cryomorphaceae	Vicingus	Genus: Vicingus
908e90a55b13f98d5c02b34726f06959	0	VcPf1N	Unhealthy	Grotta_Vico	VC	White_Cave_Dweller	Cave	Ambient	P.ficiformis	No	Yes	PetrosiaVC	PF5	Bacteria	Bacteroidota	Bacteroidia	Flavobacteriales	Flavobacteriaceae	Aquibacter	Genus: Aquibacter
95bb105301fb4aaaf404dc4623321e58	0	VcPf1N	Unhealthy	Grotta_Vico	VC	White_Cave_Dweller	Cave	Ambient	P.ficiformis	No	Yes	PetrosiaVC	PF5	Bacteria	Bacteroidota	Bacteroidia	Flavobacteriales	Cryomorphaceae	Vicingus	Genus: Vicingus
a44deed2abf1589c99411425e1e39f83	0	VcPf1N	Unhealthy	Grotta_Vico	VC	White_Cave_Dweller	Cave	Ambient	P.ficiformis	No	Yes	PetrosiaVC	PF5	Bacteria	Bacteroidota	Kapabacteria	Kapabacteriales	Kapabacteriales	Kapabacteriales	Genus: Kapabacteriales
aa55184deaf388ab0244cd84777e529f	0	VcPf1N	Unhealthy	Grotta_Vico	VC	White_Cave_Dweller	Cave	Ambient	P.ficiformis	No	Yes	PetrosiaVC	PF5	Bacteria	Bacteroidota	Bacteroidia	Chitinophagales	Chitinophagaceae	Taibaiella	Genus: Taibaiella
b3027ffdeb83e740053cda47c227dbf4	0	VcPf1N	Unhealthy	Grotta_Vico	VC	White_Cave_Dweller	Cave	Ambient	P.ficiformis	No	Yes	PetrosiaVC	PF5	Bacteria	Bacteroidota	Kapabacteria	Kapabacteriales	Kapabacteriales	Kapabacteriales	Genus: Kapabacteriales
b375dfc18deaec8e0fc8841d6d419a9f	0	VcPf1N	Unhealthy	Grotta_Vico	VC	White_Cave_Dweller	Cave	Ambient	P.ficiformis	No	Yes	PetrosiaVC	PF5	Bacteria	Bacteroidota	Bacteroidia	Cytophagales	Cyclobacteriaceae	Fulvivirga	Genus: Fulvivirga
b57755e0a386bbd066ce8766537f6145	0	VcPf1N	Unhealthy	Grotta_Vico	VC	White_Cave_Dweller	Cave	Ambient	P.ficiformis	No	Yes	PetrosiaVC	PF5	Bacteria	Bacteroidota	Ignavibacteria	Ignavibacteriales	Melioribacteraceae	IheB3-7	Genus: IheB3-7
c0b3985d0b440b8b21e6b53db57ee6fb	0	VcPf1N	Unhealthy	Grotta_Vico	VC	White_Cave_Dweller	Cave	Ambient	P.ficiformis	No	Yes	PetrosiaVC	PF5	Bacteria	Bacteroidota	Rhodothermia	Rhodothermales	Rhodothermaceae	Family: Rhodothermaceae	Family: Rhodothermaceae
c5cf85ea64f23ca59653867b85a7b239	0	VcPf1N	Unhealthy	Grotta_Vico	VC	White_Cave_Dweller	Cave	Ambient	P.ficiformis	No	Yes	PetrosiaVC	PF5	Bacteria	Bacteroidota	Bacteroidia	Class: Bacteroidia	Class: Bacteroidia	Class: Bacteroidia	Class: Bacteroidia
c67912861ae9417d06ebdd61f7afe5f3	0	VcPf1N	Unhealthy	Grotta_Vico	VC	White_Cave_Dweller	Cave	Ambient	P.ficiformis	No	Yes	PetrosiaVC	PF5	Bacteria	Bacteroidota	Bacteroidia	Chitinophagales	Chitinophagaceae	Edaphobaculum	Genus: Edaphobaculum
c92c60ca13bfee20ce6e9e48a9986a99	0	VcPf1N	Unhealthy	Grotta_Vico	VC	White_Cave_Dweller	Cave	Ambient	P.ficiformis	No	Yes	PetrosiaVC	PF5	Bacteria	Bacteroidota	Bacteroidia	Bacteroidales	Order: Bacteroidales	Order: Bacteroidales	Order: Bacteroidales
cba814ee2db31cedc8025c60fb153dea	0	VcPf1N	Unhealthy	Grotta_Vico	VC	White_Cave_Dweller	Cave	Ambient	P.ficiformis	No	Yes	PetrosiaVC	PF5	Bacteria	Bacteroidota	Bacteroidia	Flavobacteriales	Flavobacteriaceae	Lutibacter	Genus: Lutibacter
da6f12484ab6163a158ff7f3f9610d6e	0	VcPf1N	Unhealthy	Grotta_Vico	VC	White_Cave_Dweller	Cave	Ambient	P.ficiformis	No	Yes	PetrosiaVC	PF5	Bacteria	Bacteroidota	Bacteroidia	Chitinophagales	Order: Chitinophagales	Order: Chitinophagales	Order: Chitinophagales
dc17440d1cd070d4e6a166bb40295aac	0	VcPf1N	Unhealthy	Grotta_Vico	VC	White_Cave_Dweller	Cave	Ambient	P.ficiformis	No	Yes	PetrosiaVC	PF5	Bacteria	Bacteroidota	Kapabacteria	Kapabacteriales	Kapabacteriales	Kapabacteriales	Genus: Kapabacteriales
dd04992284eee3f9e298a2b87d8eafd3	0	VcPf1N	Unhealthy	Grotta_Vico	VC	White_Cave_Dweller	Cave	Ambient	P.ficiformis	No	Yes	PetrosiaVC	PF5	Bacteria	Bacteroidota	Bacteroidia	Chitinophagales	Saprospiraceae	Family: Saprospiraceae	Family: Saprospiraceae
dfa901850a009aa7115e4c3215fcfa6a	0	VcPf1N	Unhealthy	Grotta_Vico	VC	White_Cave_Dweller	Cave	Ambient	P.ficiformis	No	Yes	PetrosiaVC	PF5	Bacteria	Bacteroidota	Bacteroidia	Flavobacteriales	NS9_group	NS9_group	Genus: NS9_group
e75807dc234070866ef18fe526c366d7	0	VcPf1N	Unhealthy	Grotta_Vico	VC	White_Cave_Dweller	Cave	Ambient	P.ficiformis	No	Yes	PetrosiaVC	PF5	Bacteria	Bacteroidota	Bacteroidia	Flavobacteriales	Flavobacteriaceae	Psychroserpens	Psychroserpens_sp.
f7c8a36a4a7c9b2ecc3441bb0206172e	0	VcPf1N	Unhealthy	Grotta_Vico	VC	White_Cave_Dweller	Cave	Ambient	P.ficiformis	No	Yes	PetrosiaVC	PF5	Bacteria	Bacteroidota	Bacteroidia	Bacteroidales	Marinifilaceae	Family: Marinifilaceae	Family: Marinifilaceae
0eacff4b95457c722b80c46d72870acc	0	VcPf1N	Unhealthy	Grotta_Vico	VC	White_Cave_Dweller	Cave	Ambient	P.ficiformis	No	Yes	PetrosiaVC	PF5	Bacteria	Bdellovibrionota	Bdellovibrionia	Bdellovibrionales	Bdellovibrionaceae	OM27_clade	Genus: OM27_clade
10bc9b9e8e1198d00690dc1ecca23e32	0	VcPf1N	Unhealthy	Grotta_Vico	VC	White_Cave_Dweller	Cave	Ambient	P.ficiformis	No	Yes	PetrosiaVC	PF5	Bacteria	Bdellovibrionota	Oligoflexia	Oligoflexales	Oligoflexaceae	Family: Oligoflexaceae	Family: Oligoflexaceae
3e6c9e7a763e89b7818b6a215213a3f5	0	VcPf1N	Unhealthy	Grotta_Vico	VC	White_Cave_Dweller	Cave	Ambient	P.ficiformis	No	Yes	PetrosiaVC	PF5	Bacteria	Bdellovibrionota	Bdellovibrionia	Bacteriovoracales	Bacteriovoracaceae	Family: Bacteriovoracaceae	Family: Bacteriovoracaceae
41c38fefffe78c2fbc05400c8e2eb597	0	VcPf1N	Unhealthy	Grotta_Vico	VC	White_Cave_Dweller	Cave	Ambient	P.ficiformis	No	Yes	PetrosiaVC	PF5	Bacteria	Bdellovibrionota	Bdellovibrionia	Bdellovibrionales	Bdellovibrionaceae	OM27_clade	Genus: OM27_clade
5e7da998c25f89adcd97bf35cd4d6460	0	VcPf1N	Unhealthy	Grotta_Vico	VC	White_Cave_Dweller	Cave	Ambient	P.ficiformis	No	Yes	PetrosiaVC	PF5	Bacteria	Bdellovibrionota	Bdellovibrionia	Bdellovibrionales	Bdellovibrionaceae	Bdellovibrio	Genus: Bdellovibrio
621291eed6d8ce942d9eda3a70fe64bc	0	VcPf1N	Unhealthy	Grotta_Vico	VC	White_Cave_Dweller	Cave	Ambient	P.ficiformis	No	Yes	PetrosiaVC	PF5	Bacteria	Bdellovibrionota	Oligoflexia	Oligoflexales	Oligoflexaceae	Family: Oligoflexaceae	Family: Oligoflexaceae
6d138333f262cf09eb8279a54872a6b9	0	VcPf1N	Unhealthy	Grotta_Vico	VC	White_Cave_Dweller	Cave	Ambient	P.ficiformis	No	Yes	PetrosiaVC	PF5	Bacteria	Bdellovibrionota	Bdellovibrionia	Bdellovibrionales	Bdellovibrionaceae	Bdellovibrio	Genus: Bdellovibrio
734c4fb18a1ef29da233d3767e223980	0	VcPf1N	Unhealthy	Grotta_Vico	VC	White_Cave_Dweller	Cave	Ambient	P.ficiformis	No	Yes	PetrosiaVC	PF5	Bacteria	Bdellovibrionota	Bdellovibrionia	Bdellovibrionales	Bdellovibrionaceae	OM27_clade	Genus: OM27_clade
79403314503ec4e04a226a382b69b6e3	0	VcPf1N	Unhealthy	Grotta_Vico	VC	White_Cave_Dweller	Cave	Ambient	P.ficiformis	No	Yes	PetrosiaVC	PF5	Bacteria	Bdellovibrionota	Bdellovibrionia	Bacteriovoracales	Bacteriovoracaceae	Peredibacter	Genus: Peredibacter
89a07443e5c973ef700fba5a47b9bf8a	0	VcPf1N	Unhealthy	Grotta_Vico	VC	White_Cave_Dweller	Cave	Ambient	P.ficiformis	No	Yes	PetrosiaVC	PF5	Bacteria	Bdellovibrionota	Oligoflexia	Oligoflexales	Oligoflexaceae	Family: Oligoflexaceae	Family: Oligoflexaceae
a884359fe9efc52bd6565e3cf3c0c5c2	0	VcPf1N	Unhealthy	Grotta_Vico	VC	White_Cave_Dweller	Cave	Ambient	P.ficiformis	No	Yes	PetrosiaVC	PF5	Bacteria	Bdellovibrionota	Bdellovibrionia	Bacteriovoracales	Bacteriovoracaceae	Family: Bacteriovoracaceae	Family: Bacteriovoracaceae
b93a93c1901c633f362569214a42ffc6	0	VcPf1N	Unhealthy	Grotta_Vico	VC	White_Cave_Dweller	Cave	Ambient	P.ficiformis	No	Yes	PetrosiaVC	PF5	Bacteria	Bdellovibrionota	Bdellovibrionia	Bacteriovoracales	Bacteriovoracaceae	Peredibacter	Genus: Peredibacter
ba51642d95d01bccc3c1339af329fdd1	0	VcPf1N	Unhealthy	Grotta_Vico	VC	White_Cave_Dweller	Cave	Ambient	P.ficiformis	No	Yes	PetrosiaVC	PF5	Bacteria	Bdellovibrionota	Bdellovibrionia	Bacteriovoracales	Bacteriovoracaceae	Peredibacter	Genus: Peredibacter
c75ad5e38cfeb5b75252aed407697640	0	VcPf1N	Unhealthy	Grotta_Vico	VC	White_Cave_Dweller	Cave	Ambient	P.ficiformis	No	Yes	PetrosiaVC	PF5	Bacteria	Bdellovibrionota	Oligoflexia	0319-6G20	0319-6G20	0319-6G20	Genus: 0319-6G20
f42ef760eda02e82b4b3e91569631a1e	0	VcPf1N	Unhealthy	Grotta_Vico	VC	White_Cave_Dweller	Cave	Ambient	P.ficiformis	No	Yes	PetrosiaVC	PF5	Bacteria	Bdellovibrionota	Bdellovibrionia	Bdellovibrionales	Bdellovibrionaceae	Bdellovibrio	Genus: Bdellovibrio
0f02e62f158b2ee3988a101041ecea69	0	VcPf1N	Unhealthy	Grotta_Vico	VC	White_Cave_Dweller	Cave	Ambient	P.ficiformis	No	Yes	PetrosiaVC	PF5	Bacteria	Campylobacterota	Campylobacteria	Campylobacterales	Campylobacteraceae	Campylobacter	Genus: Campylobacter
557e95cb7ae74dc69f3b59c5a427e9fc	0	VcPf1N	Unhealthy	Grotta_Vico	VC	White_Cave_Dweller	Cave	Ambient	P.ficiformis	No	Yes	PetrosiaVC	PF5	Bacteria	Campylobacterota	Campylobacteria	Campylobacterales	Sulfurimonadaceae	Sulfurimonas	Genus: Sulfurimonas
fa55fc0ed71bc6e6d177f32f6437adda	0	VcPf1N	Unhealthy	Grotta_Vico	VC	White_Cave_Dweller	Cave	Ambient	P.ficiformis	No	Yes	PetrosiaVC	PF5	Bacteria	Campylobacterota	Campylobacteria	Campylobacterales	Sulfurimonadaceae	Sulfurimonas	Genus: Sulfurimonas
fee419dc8d2732289927db57c54c721f	0	VcPf1N	Unhealthy	Grotta_Vico	VC	White_Cave_Dweller	Cave	Ambient	P.ficiformis	No	Yes	PetrosiaVC	PF5	Bacteria	Campylobacterota	Campylobacteria	Campylobacterales	Arcobacteraceae	Family: Arcobacteraceae	Family: Arcobacteraceae
034aeaced7b18a3508012c8b832588c1	0	VcPf1N	Unhealthy	Grotta_Vico	VC	White_Cave_Dweller	Cave	Ambient	P.ficiformis	No	Yes	PetrosiaVC	PF5	Bacteria	Chloroflexi	Dehalococcoidia	SAR202_clade	SAR202_clade	SAR202_clade	Genus: SAR202_clade
05570da352ff8bd242da1548e1db25fc	0	VcPf1N	Unhealthy	Grotta_Vico	VC	White_Cave_Dweller	Cave	Ambient	P.ficiformis	No	Yes	PetrosiaVC	PF5	Bacteria	Chloroflexi	Dehalococcoidia	SAR202_clade	SAR202_clade	SAR202_clade	Genus: SAR202_clade
063cce8658f9e598aa3a032f35ab3260	0	VcPf1N	Unhealthy	Grotta_Vico	VC	White_Cave_Dweller	Cave	Ambient	P.ficiformis	No	Yes	PetrosiaVC	PF5	Bacteria	Chloroflexi	JG30-KF-CM66	JG30-KF-CM66	JG30-KF-CM66	JG30-KF-CM66	Genus: JG30-KF-CM66
074e19a99480d57ebecbb98871d28860	0	VcPf1N	Unhealthy	Grotta_Vico	VC	White_Cave_Dweller	Cave	Ambient	P.ficiformis	No	Yes	PetrosiaVC	PF5	Bacteria	Chloroflexi	Dehalococcoidia	SAR202_clade	SAR202_clade	SAR202_clade	Genus: SAR202_clade
08ceb49ab74ff5b81fd000a3f51823a0	0	VcPf1N	Unhealthy	Grotta_Vico	VC	White_Cave_Dweller	Cave	Ambient	P.ficiformis	No	Yes	PetrosiaVC	PF5	Bacteria	Chloroflexi	Dehalococcoidia	SAR202_clade	SAR202_clade	SAR202_clade	Genus: SAR202_clade
0e1a3714e541e2aae80e704ec56a607a	0	VcPf1N	Unhealthy	Grotta_Vico	VC	White_Cave_Dweller	Cave	Ambient	P.ficiformis	No	Yes	PetrosiaVC	PF5	Bacteria	Chloroflexi	Dehalococcoidia	SAR202_clade	SAR202_clade	SAR202_clade	Genus: SAR202_clade
11fb7eeed4c7ca30e5792a6b9e9f08fc	0	VcPf1N	Unhealthy	Grotta_Vico	VC	White_Cave_Dweller	Cave	Ambient	P.ficiformis	No	Yes	PetrosiaVC	PF5	Bacteria	Chloroflexi	Dehalococcoidia	SAR202_clade	SAR202_clade	SAR202_clade	Genus: SAR202_clade
173c9f2086d98062d4c0601cb5d12f76	0	VcPf1N	Unhealthy	Grotta_Vico	VC	White_Cave_Dweller	Cave	Ambient	P.ficiformis	No	Yes	PetrosiaVC	PF5	Bacteria	Chloroflexi	Anaerolineae	SBR1031	A4b	A4b	Genus: A4b
187bdf5cebe94820fee030f095b6e5a4	0	VcPf1N	Unhealthy	Grotta_Vico	VC	White_Cave_Dweller	Cave	Ambient	P.ficiformis	No	Yes	PetrosiaVC	PF5	Bacteria	Chloroflexi	Anaerolineae	SBR1031	A4b	A4b	Genus: A4b
197113967fc06328d4ab3b548355fc05	0	VcPf1N	Unhealthy	Grotta_Vico	VC	White_Cave_Dweller	Cave	Ambient	P.ficiformis	No	Yes	PetrosiaVC	PF5	Bacteria	Chloroflexi	Dehalococcoidia	SAR202_clade	SAR202_clade	SAR202_clade	Genus: SAR202_clade
1a592b4f6ace3c76c015ffb8322efea3	0	VcPf1N	Unhealthy	Grotta_Vico	VC	White_Cave_Dweller	Cave	Ambient	P.ficiformis	No	Yes	PetrosiaVC	PF5	Bacteria	Chloroflexi	Dehalococcoidia	SAR202_clade	SAR202_clade	SAR202_clade	Genus: SAR202_clade
1f5b9d32f3040bcb7d88190d889f79de	0	VcPf1N	Unhealthy	Grotta_Vico	VC	White_Cave_Dweller	Cave	Ambient	P.ficiformis	No	Yes	PetrosiaVC	PF5	Bacteria	Chloroflexi	Dehalococcoidia	SAR202_clade	SAR202_clade	SAR202_clade	Genus: SAR202_clade
238ef5e036145eedb05035a99401bbaf	0	VcPf1N	Unhealthy	Grotta_Vico	VC	White_Cave_Dweller	Cave	Ambient	P.ficiformis	No	Yes	PetrosiaVC	PF5	Bacteria	Chloroflexi	Dehalococcoidia	SAR202_clade	SAR202_clade	SAR202_clade	Genus: SAR202_clade
27fb1c3085a0016ea97c7e4991b02a10	0	VcPf1N	Unhealthy	Grotta_Vico	VC	White_Cave_Dweller	Cave	Ambient	P.ficiformis	No	Yes	PetrosiaVC	PF5	Bacteria	Chloroflexi	Dehalococcoidia	SAR202_clade	SAR202_clade	SAR202_clade	Genus: SAR202_clade
2a1d60675b24dd00980562b476989701	0	VcPf1N	Unhealthy	Grotta_Vico	VC	White_Cave_Dweller	Cave	Ambient	P.ficiformis	No	Yes	PetrosiaVC	PF5	Bacteria	Chloroflexi	Dehalococcoidia	SAR202_clade	SAR202_clade	SAR202_clade	Genus: SAR202_clade
2b3c6d1aca46f068b5087f3c30aba3d9	0	VcPf1N	Unhealthy	Grotta_Vico	VC	White_Cave_Dweller	Cave	Ambient	P.ficiformis	No	Yes	PetrosiaVC	PF5	Bacteria	Chloroflexi	Dehalococcoidia	SAR202_clade	SAR202_clade	SAR202_clade	Genus: SAR202_clade
2b61929dae032ddd4faf318aec94ca9b	0	VcPf1N	Unhealthy	Grotta_Vico	VC	White_Cave_Dweller	Cave	Ambient	P.ficiformis	No	Yes	PetrosiaVC	PF5	Bacteria	Chloroflexi	Anaerolineae	SBR1031	A4b	A4b	Genus: A4b
2ca9b028ca23b69271fbce9ecd8e6131	0	VcPf1N	Unhealthy	Grotta_Vico	VC	White_Cave_Dweller	Cave	Ambient	P.ficiformis	No	Yes	PetrosiaVC	PF5	Bacteria	Chloroflexi	Dehalococcoidia	SAR202_clade	SAR202_clade	SAR202_clade	Genus: SAR202_clade
2d6d5c9cfff1c9f827d7ea5ef81f3aff	0	VcPf1N	Unhealthy	Grotta_Vico	VC	White_Cave_Dweller	Cave	Ambient	P.ficiformis	No	Yes	PetrosiaVC	PF5	Bacteria	Chloroflexi	Dehalococcoidia	SAR202_clade	SAR202_clade	SAR202_clade	Genus: SAR202_clade
2dd77cc0448701cd23bc91ae10efe769	0	VcPf1N	Unhealthy	Grotta_Vico	VC	White_Cave_Dweller	Cave	Ambient	P.ficiformis	No	Yes	PetrosiaVC	PF5	Bacteria	Chloroflexi	Anaerolineae	Caldilineales	Caldilineaceae	Family: Caldilineaceae	Family: Caldilineaceae
2e542a0ba846e7627d36bece76b9a0e7	0	VcPf1N	Unhealthy	Grotta_Vico	VC	White_Cave_Dweller	Cave	Ambient	P.ficiformis	No	Yes	PetrosiaVC	PF5	Bacteria	Chloroflexi	Dehalococcoidia	SAR202_clade	SAR202_clade	SAR202_clade	Genus: SAR202_clade
2faa45edc19d64dd47afda7a424a53c8	0	VcPf1N	Unhealthy	Grotta_Vico	VC	White_Cave_Dweller	Cave	Ambient	P.ficiformis	No	Yes	PetrosiaVC	PF5	Bacteria	Chloroflexi	Dehalococcoidia	SAR202_clade	SAR202_clade	SAR202_clade	Genus: SAR202_clade
30478633d3b13289685ee662b995e464	0	VcPf1N	Unhealthy	Grotta_Vico	VC	White_Cave_Dweller	Cave	Ambient	P.ficiformis	No	Yes	PetrosiaVC	PF5	Bacteria	Chloroflexi	Anaerolineae	Caldilineales	Caldilineaceae	Family: Caldilineaceae	Family: Caldilineaceae
315ca649e9266db51e286539b0cc4318	0	VcPf1N	Unhealthy	Grotta_Vico	VC	White_Cave_Dweller	Cave	Ambient	P.ficiformis	No	Yes	PetrosiaVC	PF5	Bacteria	Chloroflexi	Anaerolineae	Caldilineales	Caldilineaceae	Family: Caldilineaceae	Family: Caldilineaceae
31e1f83d16331db46c6b60b39638d156	0	VcPf1N	Unhealthy	Grotta_Vico	VC	White_Cave_Dweller	Cave	Ambient	P.ficiformis	No	Yes	PetrosiaVC	PF5	Bacteria	Chloroflexi	Dehalococcoidia	SAR202_clade	SAR202_clade	SAR202_clade	Genus: SAR202_clade
327f7c2c47822695af10e3188cd3e915	0	VcPf1N	Unhealthy	Grotta_Vico	VC	White_Cave_Dweller	Cave	Ambient	P.ficiformis	No	Yes	PetrosiaVC	PF5	Bacteria	Chloroflexi	TK17	TK17	TK17	TK17	Genus: TK17
349fb1728a1763ff99699577e156a1e1	0	VcPf1N	Unhealthy	Grotta_Vico	VC	White_Cave_Dweller	Cave	Ambient	P.ficiformis	No	Yes	PetrosiaVC	PF5	Bacteria	Chloroflexi	Dehalococcoidia	SAR202_clade	SAR202_clade	SAR202_clade	Genus: SAR202_clade
375fc8a8e17a3c70b58af0a35103fc1b	0	VcPf1N	Unhealthy	Grotta_Vico	VC	White_Cave_Dweller	Cave	Ambient	P.ficiformis	No	Yes	PetrosiaVC	PF5	Bacteria	Chloroflexi	Dehalococcoidia	SAR202_clade	SAR202_clade	SAR202_clade	Genus: SAR202_clade
3a8b08c851006df76b94bcd5ff8ef9bc	0	VcPf1N	Unhealthy	Grotta_Vico	VC	White_Cave_Dweller	Cave	Ambient	P.ficiformis	No	Yes	PetrosiaVC	PF5	Bacteria	Chloroflexi	Dehalococcoidia	SAR202_clade	SAR202_clade	SAR202_clade	Genus: SAR202_clade
3bd86b403dd649303a7b01399db1002b	0	VcPf1N	Unhealthy	Grotta_Vico	VC	White_Cave_Dweller	Cave	Ambient	P.ficiformis	No	Yes	PetrosiaVC	PF5	Bacteria	Chloroflexi	Dehalococcoidia	SAR202_clade	SAR202_clade	SAR202_clade	Genus: SAR202_clade
3cf57f1e30a8605ee44d4ebbb056ccc1	0	VcPf1N	Unhealthy	Grotta_Vico	VC	White_Cave_Dweller	Cave	Ambient	P.ficiformis	No	Yes	PetrosiaVC	PF5	Bacteria	Chloroflexi	Dehalococcoidia	SAR202_clade	SAR202_clade	SAR202_clade	Genus: SAR202_clade
3ed791b3d38009ad9e223c9c01a4ec37	0	VcPf1N	Unhealthy	Grotta_Vico	VC	White_Cave_Dweller	Cave	Ambient	P.ficiformis	No	Yes	PetrosiaVC	PF5	Bacteria	Chloroflexi	Dehalococcoidia	SAR202_clade	SAR202_clade	SAR202_clade	Genus: SAR202_clade
3ef4191284c4d7878a22a186119b974f	0	VcPf1N	Unhealthy	Grotta_Vico	VC	White_Cave_Dweller	Cave	Ambient	P.ficiformis	No	Yes	PetrosiaVC	PF5	Bacteria	Chloroflexi	Dehalococcoidia	SAR202_clade	SAR202_clade	SAR202_clade	Genus: SAR202_clade
43213be73e6f509298730b640a02f2e0	0	VcPf1N	Unhealthy	Grotta_Vico	VC	White_Cave_Dweller	Cave	Ambient	P.ficiformis	No	Yes	PetrosiaVC	PF5	Bacteria	Chloroflexi	Dehalococcoidia	SAR202_clade	SAR202_clade	SAR202_clade	Genus: SAR202_clade
4b73902720694e79ed13f87dbc20f6a8	0	VcPf1N	Unhealthy	Grotta_Vico	VC	White_Cave_Dweller	Cave	Ambient	P.ficiformis	No	Yes	PetrosiaVC	PF5	Bacteria	Chloroflexi	Dehalococcoidia	SAR202_clade	SAR202_clade	SAR202_clade	Genus: SAR202_clade
4b811090620ac9eaf256202d6e1893bf	0	VcPf1N	Unhealthy	Grotta_Vico	VC	White_Cave_Dweller	Cave	Ambient	P.ficiformis	No	Yes	PetrosiaVC	PF5	Bacteria	Chloroflexi	Dehalococcoidia	SAR202_clade	SAR202_clade	SAR202_clade	Genus: SAR202_clade
4c47bdbc85188b97469c813d53d6d63b	0	VcPf1N	Unhealthy	Grotta_Vico	VC	White_Cave_Dweller	Cave	Ambient	P.ficiformis	No	Yes	PetrosiaVC	PF5	Bacteria	Chloroflexi	Dehalococcoidia	SAR202_clade	SAR202_clade	SAR202_clade	Genus: SAR202_clade
50d8929b14f24673b9ab971c6014b465	0	VcPf1N	Unhealthy	Grotta_Vico	VC	White_Cave_Dweller	Cave	Ambient	P.ficiformis	No	Yes	PetrosiaVC	PF5	Bacteria	Chloroflexi	Dehalococcoidia	SAR202_clade	SAR202_clade	SAR202_clade	Genus: SAR202_clade
50f341d4a6175d3374634cc2f617d2a2	0	VcPf1N	Unhealthy	Grotta_Vico	VC	White_Cave_Dweller	Cave	Ambient	P.ficiformis	No	Yes	PetrosiaVC	PF5	Bacteria	Chloroflexi	Anaerolineae	SBR1031	A4b	A4b	Genus: A4b
51ea2cda562169e7b6ddc12ccf957ef3	0	VcPf1N	Unhealthy	Grotta_Vico	VC	White_Cave_Dweller	Cave	Ambient	P.ficiformis	No	Yes	PetrosiaVC	PF5	Bacteria	Chloroflexi	Dehalococcoidia	SAR202_clade	SAR202_clade	SAR202_clade	Genus: SAR202_clade
5739abb396ff2b17a0d0973ad82ea585	0	VcPf1N	Unhealthy	Grotta_Vico	VC	White_Cave_Dweller	Cave	Ambient	P.ficiformis	No	Yes	PetrosiaVC	PF5	Bacteria	Chloroflexi	Dehalococcoidia	SAR202_clade	SAR202_clade	SAR202_clade	Genus: SAR202_clade
5740ed8158559b4e8a96536e9ba56d18	0	VcPf1N	Unhealthy	Grotta_Vico	VC	White_Cave_Dweller	Cave	Ambient	P.ficiformis	No	Yes	PetrosiaVC	PF5	Bacteria	Chloroflexi	Dehalococcoidia	SAR202_clade	SAR202_clade	SAR202_clade	Genus: SAR202_clade
5786bc2daf4dd854fe482fc6a1d71cfb	0	VcPf1N	Unhealthy	Grotta_Vico	VC	White_Cave_Dweller	Cave	Ambient	P.ficiformis	No	Yes	PetrosiaVC	PF5	Bacteria	Chloroflexi	Dehalococcoidia	SAR202_clade	SAR202_clade	SAR202_clade	Genus: SAR202_clade
61fb6f9c6ded7e6aafc3bdda9d5dfaa2	0	VcPf1N	Unhealthy	Grotta_Vico	VC	White_Cave_Dweller	Cave	Ambient	P.ficiformis	No	Yes	PetrosiaVC	PF5	Bacteria	Chloroflexi	Anaerolineae	SBR1031	A4b	A4b	Genus: A4b
63c966d31ca3014f617c5dd3019958f7	0	VcPf1N	Unhealthy	Grotta_Vico	VC	White_Cave_Dweller	Cave	Ambient	P.ficiformis	No	Yes	PetrosiaVC	PF5	Bacteria	Chloroflexi	Dehalococcoidia	SAR202_clade	SAR202_clade	SAR202_clade	Genus: SAR202_clade
64faf3cbc4b00f777fa72d706b358b0e	0	VcPf1N	Unhealthy	Grotta_Vico	VC	White_Cave_Dweller	Cave	Ambient	P.ficiformis	No	Yes	PetrosiaVC	PF5	Bacteria	Chloroflexi	Dehalococcoidia	SAR202_clade	SAR202_clade	SAR202_clade	Genus: SAR202_clade
670a176bcbf566fb89f1ec87f83eabc3	0	VcPf1N	Unhealthy	Grotta_Vico	VC	White_Cave_Dweller	Cave	Ambient	P.ficiformis	No	Yes	PetrosiaVC	PF5	Bacteria	Chloroflexi	Dehalococcoidia	SAR202_clade	SAR202_clade	SAR202_clade	Genus: SAR202_clade
6b374149f88e0a57942b75e55edfb16f	0	VcPf1N	Unhealthy	Grotta_Vico	VC	White_Cave_Dweller	Cave	Ambient	P.ficiformis	No	Yes	PetrosiaVC	PF5	Bacteria	Chloroflexi	Dehalococcoidia	SAR202_clade	SAR202_clade	SAR202_clade	Genus: SAR202_clade
710b8460da5d5ba63fb583278ef8b4ff	0	VcPf1N	Unhealthy	Grotta_Vico	VC	White_Cave_Dweller	Cave	Ambient	P.ficiformis	No	Yes	PetrosiaVC	PF5	Bacteria	Chloroflexi	Dehalococcoidia	SAR202_clade	SAR202_clade	SAR202_clade	Genus: SAR202_clade
74130f656bc6408efad8e52e62b6c095	0	VcPf1N	Unhealthy	Grotta_Vico	VC	White_Cave_Dweller	Cave	Ambient	P.ficiformis	No	Yes	PetrosiaVC	PF5	Bacteria	Chloroflexi	Dehalococcoidia	SAR202_clade	SAR202_clade	SAR202_clade	Genus: SAR202_clade
77d2ef195030ea165bb9d9b1891d24ca	0	VcPf1N	Unhealthy	Grotta_Vico	VC	White_Cave_Dweller	Cave	Ambient	P.ficiformis	No	Yes	PetrosiaVC	PF5	Bacteria	Chloroflexi	Dehalococcoidia	SAR202_clade	SAR202_clade	SAR202_clade	Genus: SAR202_clade
7a636763b9d1e2c1a931ae4fb684ee7f	0	VcPf1N	Unhealthy	Grotta_Vico	VC	White_Cave_Dweller	Cave	Ambient	P.ficiformis	No	Yes	PetrosiaVC	PF5	Bacteria	Chloroflexi	Dehalococcoidia	SAR202_clade	SAR202_clade	SAR202_clade	Genus: SAR202_clade
7acea8299e26f7d51b0953e29ed4a686	0	VcPf1N	Unhealthy	Grotta_Vico	VC	White_Cave_Dweller	Cave	Ambient	P.ficiformis	No	Yes	PetrosiaVC	PF5	Bacteria	Chloroflexi	Anaerolineae	Caldilineales	Caldilineaceae	Family: Caldilineaceae	Family: Caldilineaceae
7e0b198ec5c9147458922e43f09ac3f2	0	VcPf1N	Unhealthy	Grotta_Vico	VC	White_Cave_Dweller	Cave	Ambient	P.ficiformis	No	Yes	PetrosiaVC	PF5	Bacteria	Chloroflexi	Dehalococcoidia	SAR202_clade	SAR202_clade	SAR202_clade	Genus: SAR202_clade
7f270b16d032c63a356129be54533834	0	VcPf1N	Unhealthy	Grotta_Vico	VC	White_Cave_Dweller	Cave	Ambient	P.ficiformis	No	Yes	PetrosiaVC	PF5	Bacteria	Chloroflexi	TK17	TK17	TK17	TK17	Genus: TK17
7ff06c1183f9d245523e7265be966be2	0	VcPf1N	Unhealthy	Grotta_Vico	VC	White_Cave_Dweller	Cave	Ambient	P.ficiformis	No	Yes	PetrosiaVC	PF5	Bacteria	Chloroflexi	Dehalococcoidia	SAR202_clade	SAR202_clade	SAR202_clade	Genus: SAR202_clade
80214b75450e4d53893b0f57d371a6fc	0	VcPf1N	Unhealthy	Grotta_Vico	VC	White_Cave_Dweller	Cave	Ambient	P.ficiformis	No	Yes	PetrosiaVC	PF5	Bacteria	Chloroflexi	Dehalococcoidia	SAR202_clade	SAR202_clade	SAR202_clade	Genus: SAR202_clade
84988545b42039507069885ac45ff279	0	VcPf1N	Unhealthy	Grotta_Vico	VC	White_Cave_Dweller	Cave	Ambient	P.ficiformis	No	Yes	PetrosiaVC	PF5	Bacteria	Chloroflexi	Anaerolineae	Caldilineales	Caldilineaceae	Family: Caldilineaceae	Family: Caldilineaceae
8801476a34abebcf01bba3d3fbdb38b6	0	VcPf1N	Unhealthy	Grotta_Vico	VC	White_Cave_Dweller	Cave	Ambient	P.ficiformis	No	Yes	PetrosiaVC	PF5	Bacteria	Chloroflexi	Dehalococcoidia	SAR202_clade	SAR202_clade	SAR202_clade	Genus: SAR202_clade
8e2b88fa6680528734b9570ffd855be8	0	VcPf1N	Unhealthy	Grotta_Vico	VC	White_Cave_Dweller	Cave	Ambient	P.ficiformis	No	Yes	PetrosiaVC	PF5	Bacteria	Chloroflexi	Anaerolineae	Caldilineales	Caldilineaceae	Family: Caldilineaceae	Family: Caldilineaceae
9059524c7f9121e76856fe0fec324bad	0	VcPf1N	Unhealthy	Grotta_Vico	VC	White_Cave_Dweller	Cave	Ambient	P.ficiformis	No	Yes	PetrosiaVC	PF5	Bacteria	Chloroflexi	Dehalococcoidia	SAR202_clade	SAR202_clade	SAR202_clade	Genus: SAR202_clade
91967a0f980d933fbeb04955d806240c	0	VcPf1N	Unhealthy	Grotta_Vico	VC	White_Cave_Dweller	Cave	Ambient	P.ficiformis	No	Yes	PetrosiaVC	PF5	Bacteria	Chloroflexi	Dehalococcoidia	SAR202_clade	SAR202_clade	SAR202_clade	Genus: SAR202_clade
921dd46bd2764944eaccbbabaef7e319	0	VcPf1N	Unhealthy	Grotta_Vico	VC	White_Cave_Dweller	Cave	Ambient	P.ficiformis	No	Yes	PetrosiaVC	PF5	Bacteria	Chloroflexi	Anaerolineae	SBR1031	A4b	A4b	Genus: A4b
931d81bc6fcacf7905981e93ad0fcb24	0	VcPf1N	Unhealthy	Grotta_Vico	VC	White_Cave_Dweller	Cave	Ambient	P.ficiformis	No	Yes	PetrosiaVC	PF5	Bacteria	Chloroflexi	Dehalococcoidia	SAR202_clade	SAR202_clade	SAR202_clade	Genus: SAR202_clade
971e47f57d7ccebc4d3706a84dfed8b1	0	VcPf1N	Unhealthy	Grotta_Vico	VC	White_Cave_Dweller	Cave	Ambient	P.ficiformis	No	Yes	PetrosiaVC	PF5	Bacteria	Chloroflexi	Dehalococcoidia	SAR202_clade	SAR202_clade	SAR202_clade	Genus: SAR202_clade
9993e12043c4fb45d807c6c1efbfb5f2	0	VcPf1N	Unhealthy	Grotta_Vico	VC	White_Cave_Dweller	Cave	Ambient	P.ficiformis	No	Yes	PetrosiaVC	PF5	Bacteria	Chloroflexi	Anaerolineae	SBR1031	A4b	A4b	Genus: A4b
9a3dee015b81ba479f9297af9a452c19	0	VcPf1N	Unhealthy	Grotta_Vico	VC	White_Cave_Dweller	Cave	Ambient	P.ficiformis	No	Yes	PetrosiaVC	PF5	Bacteria	Chloroflexi	Dehalococcoidia	SAR202_clade	SAR202_clade	SAR202_clade	Genus: SAR202_clade
9a8f7b332d9e7d9bfa2e35fd468e572a	0	VcPf1N	Unhealthy	Grotta_Vico	VC	White_Cave_Dweller	Cave	Ambient	P.ficiformis	No	Yes	PetrosiaVC	PF5	Bacteria	Chloroflexi	Dehalococcoidia	SAR202_clade	SAR202_clade	SAR202_clade	Genus: SAR202_clade
9bcd2ed22fbdc508d8687f2b44dd295c	0	VcPf1N	Unhealthy	Grotta_Vico	VC	White_Cave_Dweller	Cave	Ambient	P.ficiformis	No	Yes	PetrosiaVC	PF5	Bacteria	Chloroflexi	Anaerolineae	SBR1031	A4b	A4b	Genus: A4b
a074104b07700d40cdf80b2660e14be3	0	VcPf1N	Unhealthy	Grotta_Vico	VC	White_Cave_Dweller	Cave	Ambient	P.ficiformis	No	Yes	PetrosiaVC	PF5	Bacteria	Chloroflexi	Dehalococcoidia	SAR202_clade	SAR202_clade	SAR202_clade	Genus: SAR202_clade
a199c4d2005ab2ad4f3dafecfd19873e	0	VcPf1N	Unhealthy	Grotta_Vico	VC	White_Cave_Dweller	Cave	Ambient	P.ficiformis	No	Yes	PetrosiaVC	PF5	Bacteria	Chloroflexi	TK17	TK17	TK17	TK17	Genus: TK17
a6fd7d7920456ece08d1946da9e1e2d1	0	VcPf1N	Unhealthy	Grotta_Vico	VC	White_Cave_Dweller	Cave	Ambient	P.ficiformis	No	Yes	PetrosiaVC	PF5	Bacteria	Chloroflexi	Dehalococcoidia	SAR202_clade	SAR202_clade	SAR202_clade	Genus: SAR202_clade
a7278bea7bf1478733364be9be08018d	0	VcPf1N	Unhealthy	Grotta_Vico	VC	White_Cave_Dweller	Cave	Ambient	P.ficiformis	No	Yes	PetrosiaVC	PF5	Bacteria	Chloroflexi	Dehalococcoidia	SAR202_clade	SAR202_clade	SAR202_clade	Genus: SAR202_clade
a850be3eb1a02351c6f4eb993ff2279b	0	VcPf1N	Unhealthy	Grotta_Vico	VC	White_Cave_Dweller	Cave	Ambient	P.ficiformis	No	Yes	PetrosiaVC	PF5	Bacteria	Chloroflexi	JG30-KF-CM66	JG30-KF-CM66	JG30-KF-CM66	JG30-KF-CM66	Genus: JG30-KF-CM66
aa6a4d2487f9263c77bb7d7d13e57b6d	0	VcPf1N	Unhealthy	Grotta_Vico	VC	White_Cave_Dweller	Cave	Ambient	P.ficiformis	No	Yes	PetrosiaVC	PF5	Bacteria	Chloroflexi	Dehalococcoidia	SAR202_clade	SAR202_clade	SAR202_clade	Genus: SAR202_clade
ab46399cc898e26437ea05f7fc39510f	0	VcPf1N	Unhealthy	Grotta_Vico	VC	White_Cave_Dweller	Cave	Ambient	P.ficiformis	No	Yes	PetrosiaVC	PF5	Bacteria	Chloroflexi	TK17	TK17	TK17	TK17	Genus: TK17
ab8ecc7d8382d653756f215910174e58	0	VcPf1N	Unhealthy	Grotta_Vico	VC	White_Cave_Dweller	Cave	Ambient	P.ficiformis	No	Yes	PetrosiaVC	PF5	Bacteria	Chloroflexi	Dehalococcoidia	SAR202_clade	SAR202_clade	SAR202_clade	Genus: SAR202_clade
ae40de0c28ef2b2cdfe5c34e4eec3527	0	VcPf1N	Unhealthy	Grotta_Vico	VC	White_Cave_Dweller	Cave	Ambient	P.ficiformis	No	Yes	PetrosiaVC	PF5	Bacteria	Chloroflexi	Dehalococcoidia	SAR202_clade	SAR202_clade	SAR202_clade	Genus: SAR202_clade
b4818fa6fc12c8b8beabdafad4b98a8e	0	VcPf1N	Unhealthy	Grotta_Vico	VC	White_Cave_Dweller	Cave	Ambient	P.ficiformis	No	Yes	PetrosiaVC	PF5	Bacteria	Chloroflexi	Dehalococcoidia	SAR202_clade	SAR202_clade	SAR202_clade	Genus: SAR202_clade
b8457493b432c73da345e303b0c33e4b	0	VcPf1N	Unhealthy	Grotta_Vico	VC	White_Cave_Dweller	Cave	Ambient	P.ficiformis	No	Yes	PetrosiaVC	PF5	Bacteria	Chloroflexi	Dehalococcoidia	SAR202_clade	SAR202_clade	SAR202_clade	Genus: SAR202_clade
b8c65064dbf332a57d6741d0c1c64648	0	VcPf1N	Unhealthy	Grotta_Vico	VC	White_Cave_Dweller	Cave	Ambient	P.ficiformis	No	Yes	PetrosiaVC	PF5	Bacteria	Chloroflexi	Anaerolineae	SBR1031	A4b	A4b	Genus: A4b
baba2af4aa14178d6590f6a27466f6b8	0	VcPf1N	Unhealthy	Grotta_Vico	VC	White_Cave_Dweller	Cave	Ambient	P.ficiformis	No	Yes	PetrosiaVC	PF5	Bacteria	Chloroflexi	Dehalococcoidia	SAR202_clade	SAR202_clade	SAR202_clade	Genus: SAR202_clade
bdece1e668e6fde3867591ae2900ea90	0	VcPf1N	Unhealthy	Grotta_Vico	VC	White_Cave_Dweller	Cave	Ambient	P.ficiformis	No	Yes	PetrosiaVC	PF5	Bacteria	Chloroflexi	Dehalococcoidia	SAR202_clade	SAR202_clade	SAR202_clade	Genus: SAR202_clade
c1ea66e1e2570b9b92d0a131ea754574	0	VcPf1N	Unhealthy	Grotta_Vico	VC	White_Cave_Dweller	Cave	Ambient	P.ficiformis	No	Yes	PetrosiaVC	PF5	Bacteria	Chloroflexi	Dehalococcoidia	SAR202_clade	SAR202_clade	SAR202_clade	Genus: SAR202_clade
c53db61028126670547e600b0aa8ff70	0	VcPf1N	Unhealthy	Grotta_Vico	VC	White_Cave_Dweller	Cave	Ambient	P.ficiformis	No	Yes	PetrosiaVC	PF5	Bacteria	Chloroflexi	Anaerolineae	Caldilineales	Caldilineaceae	Family: Caldilineaceae	Family: Caldilineaceae
c892066f513d6383bdc91ed8f53469af	0	VcPf1N	Unhealthy	Grotta_Vico	VC	White_Cave_Dweller	Cave	Ambient	P.ficiformis	No	Yes	PetrosiaVC	PF5	Bacteria	Chloroflexi	JG30-KF-CM66	JG30-KF-CM66	JG30-KF-CM66	JG30-KF-CM66	Genus: JG30-KF-CM66
c8a8594140b1c6e0139a337b03b0ba4d	0	VcPf1N	Unhealthy	Grotta_Vico	VC	White_Cave_Dweller	Cave	Ambient	P.ficiformis	No	Yes	PetrosiaVC	PF5	Bacteria	Chloroflexi	Anaerolineae	SBR1031	A4b	A4b	Genus: A4b
cbafa34b4b5463b2758ad307c53006e7	0	VcPf1N	Unhealthy	Grotta_Vico	VC	White_Cave_Dweller	Cave	Ambient	P.ficiformis	No	Yes	PetrosiaVC	PF5	Bacteria	Chloroflexi	Dehalococcoidia	SAR202_clade	SAR202_clade	SAR202_clade	Genus: SAR202_clade
cd7a605b7c7129c35c2b41a2c84441bb	0	VcPf1N	Unhealthy	Grotta_Vico	VC	White_Cave_Dweller	Cave	Ambient	P.ficiformis	No	Yes	PetrosiaVC	PF5	Bacteria	Chloroflexi	Dehalococcoidia	S085	S085	S085	Genus: S085
cf8c413052193af977287d9da18c4d39	0	VcPf1N	Unhealthy	Grotta_Vico	VC	White_Cave_Dweller	Cave	Ambient	P.ficiformis	No	Yes	PetrosiaVC	PF5	Bacteria	Chloroflexi	Anaerolineae	SBR1031	A4b	A4b	Genus: A4b
d4c58b4122db5d465b12009453e08427	0	VcPf1N	Unhealthy	Grotta_Vico	VC	White_Cave_Dweller	Cave	Ambient	P.ficiformis	No	Yes	PetrosiaVC	PF5	Bacteria	Chloroflexi	Dehalococcoidia	SAR202_clade	SAR202_clade	SAR202_clade	Genus: SAR202_clade
d5c24d6810853d797cdcdf4ac8cdbf0e	0	VcPf1N	Unhealthy	Grotta_Vico	VC	White_Cave_Dweller	Cave	Ambient	P.ficiformis	No	Yes	PetrosiaVC	PF5	Bacteria	Chloroflexi	Dehalococcoidia	SAR202_clade	SAR202_clade	SAR202_clade	Genus: SAR202_clade
d7c5f473f6373dc98492829af4241f42	0	VcPf1N	Unhealthy	Grotta_Vico	VC	White_Cave_Dweller	Cave	Ambient	P.ficiformis	No	Yes	PetrosiaVC	PF5	Bacteria	Chloroflexi	Dehalococcoidia	SAR202_clade	SAR202_clade	SAR202_clade	Genus: SAR202_clade
da3f31ea9a8fc202617a3288de62a567	0	VcPf1N	Unhealthy	Grotta_Vico	VC	White_Cave_Dweller	Cave	Ambient	P.ficiformis	No	Yes	PetrosiaVC	PF5	Bacteria	Chloroflexi	Dehalococcoidia	SAR202_clade	SAR202_clade	SAR202_clade	Genus: SAR202_clade
dc1a9947c5acc6a1376666fee2e16fdb	0	VcPf1N	Unhealthy	Grotta_Vico	VC	White_Cave_Dweller	Cave	Ambient	P.ficiformis	No	Yes	PetrosiaVC	PF5	Bacteria	Chloroflexi	Dehalococcoidia	SAR202_clade	SAR202_clade	SAR202_clade	Genus: SAR202_clade
dd4ec1bdb423917dc44d526d75dc08ed	0	VcPf1N	Unhealthy	Grotta_Vico	VC	White_Cave_Dweller	Cave	Ambient	P.ficiformis	No	Yes	PetrosiaVC	PF5	Bacteria	Chloroflexi	Dehalococcoidia	SAR202_clade	SAR202_clade	SAR202_clade	Genus: SAR202_clade
e167cf051046b701301c87a569f8c4a2	0	VcPf1N	Unhealthy	Grotta_Vico	VC	White_Cave_Dweller	Cave	Ambient	P.ficiformis	No	Yes	PetrosiaVC	PF5	Bacteria	Chloroflexi	Dehalococcoidia	SAR202_clade	SAR202_clade	SAR202_clade	Genus: SAR202_clade
e1731bd5d1e591d09317ee220ce0d3e7	0	VcPf1N	Unhealthy	Grotta_Vico	VC	White_Cave_Dweller	Cave	Ambient	P.ficiformis	No	Yes	PetrosiaVC	PF5	Bacteria	Chloroflexi	Dehalococcoidia	SAR202_clade	SAR202_clade	SAR202_clade	Genus: SAR202_clade
e30d6ed8dad0da58161077d97b4b982d	0	VcPf1N	Unhealthy	Grotta_Vico	VC	White_Cave_Dweller	Cave	Ambient	P.ficiformis	No	Yes	PetrosiaVC	PF5	Bacteria	Chloroflexi	TK17	TK17	TK17	TK17	Genus: TK17
ead4140c1891c0da50c99a9c374f7bf7	0	VcPf1N	Unhealthy	Grotta_Vico	VC	White_Cave_Dweller	Cave	Ambient	P.ficiformis	No	Yes	PetrosiaVC	PF5	Bacteria	Chloroflexi	Dehalococcoidia	SAR202_clade	SAR202_clade	SAR202_clade	Genus: SAR202_clade
f0672c674b0f9c2731ce75190e47b864	0	VcPf1N	Unhealthy	Grotta_Vico	VC	White_Cave_Dweller	Cave	Ambient	P.ficiformis	No	Yes	PetrosiaVC	PF5	Bacteria	Chloroflexi	Dehalococcoidia	SAR202_clade	SAR202_clade	SAR202_clade	Genus: SAR202_clade
f1414b821a44103818ff17359fa806ee	0	VcPf1N	Unhealthy	Grotta_Vico	VC	White_Cave_Dweller	Cave	Ambient	P.ficiformis	No	Yes	PetrosiaVC	PF5	Bacteria	Chloroflexi	Dehalococcoidia	SAR202_clade	SAR202_clade	SAR202_clade	Genus: SAR202_clade
f5dcc438a3498a321e159779e67a16d7	0	VcPf1N	Unhealthy	Grotta_Vico	VC	White_Cave_Dweller	Cave	Ambient	P.ficiformis	No	Yes	PetrosiaVC	PF5	Bacteria	Chloroflexi	Anaerolineae	Ardenticatenales	Order: Ardenticatenales	Order: Ardenticatenales	Order: Ardenticatenales
f666a59c136d4c02014b23acca2cd2a7	0	VcPf1N	Unhealthy	Grotta_Vico	VC	White_Cave_Dweller	Cave	Ambient	P.ficiformis	No	Yes	PetrosiaVC	PF5	Bacteria	Chloroflexi	TK30	TK30	TK30	TK30	Genus: TK30
f8001f9bc1459e220983121817265230	0	VcPf1N	Unhealthy	Grotta_Vico	VC	White_Cave_Dweller	Cave	Ambient	P.ficiformis	No	Yes	PetrosiaVC	PF5	Bacteria	Chloroflexi	Anaerolineae	Caldilineales	Caldilineaceae	Family: Caldilineaceae	Family: Caldilineaceae
f88c829d9fd92ff23377d1d9fbcdc2eb	0	VcPf1N	Unhealthy	Grotta_Vico	VC	White_Cave_Dweller	Cave	Ambient	P.ficiformis	No	Yes	PetrosiaVC	PF5	Bacteria	Chloroflexi	Dehalococcoidia	SAR202_clade	SAR202_clade	SAR202_clade	Genus: SAR202_clade
fce6dd765d721e08e13a1439a49985b2	0	VcPf1N	Unhealthy	Grotta_Vico	VC	White_Cave_Dweller	Cave	Ambient	P.ficiformis	No	Yes	PetrosiaVC	PF5	Bacteria	Chloroflexi	Dehalococcoidia	SAR202_clade	SAR202_clade	SAR202_clade	Genus: SAR202_clade
fdc26e99b5dc958c1a881302e582e32a	0	VcPf1N	Unhealthy	Grotta_Vico	VC	White_Cave_Dweller	Cave	Ambient	P.ficiformis	No	Yes	PetrosiaVC	PF5	Bacteria	Chloroflexi	Dehalococcoidia	SAR202_clade	SAR202_clade	SAR202_clade	Genus: SAR202_clade
fe7689860d8ba5efbf68964adb8e9af2	0	VcPf1N	Unhealthy	Grotta_Vico	VC	White_Cave_Dweller	Cave	Ambient	P.ficiformis	No	Yes	PetrosiaVC	PF5	Bacteria	Chloroflexi	Dehalococcoidia	SAR202_clade	SAR202_clade	SAR202_clade	Genus: SAR202_clade
53701170c4d843abd08745418caa56cc	0	VcPf1N	Unhealthy	Grotta_Vico	VC	White_Cave_Dweller	Cave	Ambient	P.ficiformis	No	Yes	PetrosiaVC	PF5	Archaea	Crenarchaeota	Nitrososphaeria	Nitrosopumilales	Nitrosopumilaceae	Candidatus_Nitrosopumilus	Genus: Candidatus_Nitrosopumilus
7296b922fbbc28a87c2beaf0453830dc	0	VcPf1N	Unhealthy	Grotta_Vico	VC	White_Cave_Dweller	Cave	Ambient	P.ficiformis	No	Yes	PetrosiaVC	PF5	Archaea	Crenarchaeota	Nitrososphaeria	Nitrosopumilales	Nitrosopumilaceae	Candidatus_Nitrosopumilus	Genus: Candidatus_Nitrosopumilus
0127b142ef276a94a661fcdcd5652042	0	VcPf1N	Unhealthy	Grotta_Vico	VC	White_Cave_Dweller	Cave	Ambient	P.ficiformis	No	Yes	PetrosiaVC	PF5	Bacteria	Cyanobacteria	Vampirivibrionia	Gastranaerophilales	Gastranaerophilales	Gastranaerophilales	Genus: Gastranaerophilales
1c361fedc9299439510b00b49087263b	0	VcPf1N	Unhealthy	Grotta_Vico	VC	White_Cave_Dweller	Cave	Ambient	P.ficiformis	No	Yes	PetrosiaVC	PF5	Bacteria	Cyanobacteria	Vampirivibrionia	Gastranaerophilales	Gastranaerophilales	Gastranaerophilales	Genus: Gastranaerophilales
1dcbdd16b2bd0397d10fea8f84500ddd	0	VcPf1N	Unhealthy	Grotta_Vico	VC	White_Cave_Dweller	Cave	Ambient	P.ficiformis	No	Yes	PetrosiaVC	PF5	Bacteria	Cyanobacteria	Vampirivibrionia	Gastranaerophilales	Gastranaerophilales	Gastranaerophilales	Genus: Gastranaerophilales
31fde767f1a037b900a10cf8de062b54	0	VcPf1N	Unhealthy	Grotta_Vico	VC	White_Cave_Dweller	Cave	Ambient	P.ficiformis	No	Yes	PetrosiaVC	PF5	Bacteria	Cyanobacteria	Vampirivibrionia	Gastranaerophilales	Gastranaerophilales	Gastranaerophilales	Genus: Gastranaerophilales
5ac7a49d5f54c608d49fe0fba33570b5	0	VcPf1N	Unhealthy	Grotta_Vico	VC	White_Cave_Dweller	Cave	Ambient	P.ficiformis	No	Yes	PetrosiaVC	PF5	Bacteria	Cyanobacteria	Vampirivibrionia	Gastranaerophilales	Gastranaerophilales	Gastranaerophilales	Genus: Gastranaerophilales
5b272d9ab45592dadaf51a5e97171a02	0	VcPf1N	Unhealthy	Grotta_Vico	VC	White_Cave_Dweller	Cave	Ambient	P.ficiformis	No	Yes	PetrosiaVC	PF5	Bacteria	Cyanobacteria	Vampirivibrionia	Gastranaerophilales	Gastranaerophilales	Gastranaerophilales	Genus: Gastranaerophilales
72da7ca3f5244fdf454ecb79d0c21f2a	0	VcPf1N	Unhealthy	Grotta_Vico	VC	White_Cave_Dweller	Cave	Ambient	P.ficiformis	No	Yes	PetrosiaVC	PF5	Bacteria	Cyanobacteria	Vampirivibrionia	Gastranaerophilales	Gastranaerophilales	Gastranaerophilales	Genus: Gastranaerophilales
9a2b84aa199969cbde8ab5d37062fc68	0	VcPf1N	Unhealthy	Grotta_Vico	VC	White_Cave_Dweller	Cave	Ambient	P.ficiformis	No	Yes	PetrosiaVC	PF5	Bacteria	Cyanobacteria	Vampirivibrionia	Gastranaerophilales	Gastranaerophilales	Gastranaerophilales	Genus: Gastranaerophilales
9c04e15a4e43be7f06eaded33ced911a	0	VcPf1N	Unhealthy	Grotta_Vico	VC	White_Cave_Dweller	Cave	Ambient	P.ficiformis	No	Yes	PetrosiaVC	PF5	Bacteria	Cyanobacteria	Vampirivibrionia	Gastranaerophilales	Gastranaerophilales	Gastranaerophilales	Genus: Gastranaerophilales
a087e2859a5bca997c5d6595c0ac3280	0	VcPf1N	Unhealthy	Grotta_Vico	VC	White_Cave_Dweller	Cave	Ambient	P.ficiformis	No	Yes	PetrosiaVC	PF5	Bacteria	Cyanobacteria	Cyanobacteriia	Synechococcales	Cyanobiaceae	Synechococcus_CC9902	Genus: Synechococcus_CC9902
fa7182f1bcd4d2ddaa77712e2ec30776	0	VcPf1N	Unhealthy	Grotta_Vico	VC	White_Cave_Dweller	Cave	Ambient	P.ficiformis	No	Yes	PetrosiaVC	PF5	Bacteria	Cyanobacteria	Vampirivibrionia	Gastranaerophilales	Gastranaerophilales	Gastranaerophilales	Genus: Gastranaerophilales
5a8c1c9db3c3545353c94d4f478ef15d	0	VcPf1N	Unhealthy	Grotta_Vico	VC	White_Cave_Dweller	Cave	Ambient	P.ficiformis	No	Yes	PetrosiaVC	PF5	Bacteria	Dadabacteria	Dadabacteriia	Dadabacteriales	Dadabacteriales	Dadabacteriales	Genus: Dadabacteriales
8329afefb4a0abf945664fa65f120710	0	VcPf1N	Unhealthy	Grotta_Vico	VC	White_Cave_Dweller	Cave	Ambient	P.ficiformis	No	Yes	PetrosiaVC	PF5	Bacteria	Dadabacteria	Dadabacteriia	Dadabacteriales	Dadabacteriales	Dadabacteriales	Genus: Dadabacteriales
cf4cf2391fb14ea3b083351dd4a68f8f	0	VcPf1N	Unhealthy	Grotta_Vico	VC	White_Cave_Dweller	Cave	Ambient	P.ficiformis	No	Yes	PetrosiaVC	PF5	Bacteria	Dadabacteria	Dadabacteriia	Dadabacteriales	Dadabacteriales	Dadabacteriales	Genus: Dadabacteriales
0a3d96166a0a0ce146e207fdbd5d9e37	0	VcPf1N	Unhealthy	Grotta_Vico	VC	White_Cave_Dweller	Cave	Ambient	P.ficiformis	No	Yes	PetrosiaVC	PF5	Bacteria	Deinococcota	Deinococci	Deinococcales	Trueperaceae	Truepera	Genus: Truepera
36efecc5394efd07b3541546b4edd7f7	0	VcPf1N	Unhealthy	Grotta_Vico	VC	White_Cave_Dweller	Cave	Ambient	P.ficiformis	No	Yes	PetrosiaVC	PF5	Bacteria	Deinococcota	Deinococci	Deinococcales	Trueperaceae	Truepera	Genus: Truepera
15c52579cec725f36746825f76a715e5	0	VcPf1N	Unhealthy	Grotta_Vico	VC	White_Cave_Dweller	Cave	Ambient	P.ficiformis	No	Yes	PetrosiaVC	PF5	Bacteria	Desulfobacterota	Desulfuromonadia	Bradymonadales	Bradymonadales	Bradymonadales	Genus: Bradymonadales
2adea575cb26683fe05be03a52b583fe	0	VcPf1N	Unhealthy	Grotta_Vico	VC	White_Cave_Dweller	Cave	Ambient	P.ficiformis	No	Yes	PetrosiaVC	PF5	Bacteria	Desulfobacterota	Desulfovibrionia	Desulfovibrionales	Desulfovibrionaceae	Halodesulfovibrio	delta_proteobacterium
4029daa0addfcfe6adb895cabfe3ca6e	0	VcPf1N	Unhealthy	Grotta_Vico	VC	White_Cave_Dweller	Cave	Ambient	P.ficiformis	No	Yes	PetrosiaVC	PF5	Bacteria	Desulfobacterota	Desulfovibrionia	Desulfovibrionales	Desulfovibrionaceae	Desulfovibrio	Genus: Desulfovibrio
5132b3d6f92bfd2ab6b8016f5105782a	0	VcPf1N	Unhealthy	Grotta_Vico	VC	White_Cave_Dweller	Cave	Ambient	P.ficiformis	No	Yes	PetrosiaVC	PF5	Bacteria	Desulfobacterota	Desulfovibrionia	Desulfovibrionales	Desulfovibrionaceae	Halodesulfovibrio	Genus: Halodesulfovibrio
94d8d29ab3b006bf6ed4731b8875ffeb	0	VcPf1N	Unhealthy	Grotta_Vico	VC	White_Cave_Dweller	Cave	Ambient	P.ficiformis	No	Yes	PetrosiaVC	PF5	Bacteria	Desulfobacterota	Desulfobulbia	Desulfobulbales	Desulfocapsaceae	Family: Desulfocapsaceae	Family: Desulfocapsaceae
a0d5adeadf21d7636fcfd8bac926e5fd	0	VcPf1N	Unhealthy	Grotta_Vico	VC	White_Cave_Dweller	Cave	Ambient	P.ficiformis	No	Yes	PetrosiaVC	PF5	Bacteria	Desulfobacterota	Desulfuromonadia	Bradymonadales	Bradymonadales	Bradymonadales	Genus: Bradymonadales
b1bdacd3512d90c6141b6d5b1299292d	0	VcPf1N	Unhealthy	Grotta_Vico	VC	White_Cave_Dweller	Cave	Ambient	P.ficiformis	No	Yes	PetrosiaVC	PF5	Bacteria	Desulfobacterota	Desulfuromonadia	PB19	PB19	PB19	Genus: PB19
b52e5e60b0ac5d2d9169291e9879325a	0	VcPf1N	Unhealthy	Grotta_Vico	VC	White_Cave_Dweller	Cave	Ambient	P.ficiformis	No	Yes	PetrosiaVC	PF5	Bacteria	Desulfobacterota	Desulfobulbia	Desulfobulbales	Desulfobulbaceae	Desulfobulbus	Genus: Desulfobulbus
bad8f7c60e6fbfb3cad5fefb413bda47	0	VcPf1N	Unhealthy	Grotta_Vico	VC	White_Cave_Dweller	Cave	Ambient	P.ficiformis	No	Yes	PetrosiaVC	PF5	Bacteria	Desulfobacterota	Desulfuromonadia	Bradymonadales	Bradymonadales	Bradymonadales	Genus: Bradymonadales
efc89b9d0e60cf93d68578585483f4dc	0	VcPf1N	Unhealthy	Grotta_Vico	VC	White_Cave_Dweller	Cave	Ambient	P.ficiformis	No	Yes	PetrosiaVC	PF5	Bacteria	Desulfobacterota	Desulfuromonadia	Bradymonadales	Bradymonadales	Bradymonadales	Genus: Bradymonadales
f266d72d5a290d969c79897923dd2730	0	VcPf1N	Unhealthy	Grotta_Vico	VC	White_Cave_Dweller	Cave	Ambient	P.ficiformis	No	Yes	PetrosiaVC	PF5	Bacteria	Desulfobacterota	Desulfobacteria	Desulfobacterales	Desulfosarcinaceae	Desulfatibacillum	Genus: Desulfatibacillum
fe4e89db45d620d9970617e7274c41cf	0	VcPf1N	Unhealthy	Grotta_Vico	VC	White_Cave_Dweller	Cave	Ambient	P.ficiformis	No	Yes	PetrosiaVC	PF5	Bacteria	Desulfobacterota	Desulfovibrionia	Desulfovibrionales	Desulfovibrionaceae	Halodesulfovibrio	Genus: Halodesulfovibrio
0c9a6678e79d3467518cbd0282050072	0	VcPf1N	Unhealthy	Grotta_Vico	VC	White_Cave_Dweller	Cave	Ambient	P.ficiformis	No	Yes	PetrosiaVC	PF5	Bacteria	Firmicutes	Clostridia	Peptostreptococcales-Tissierellales	Peptostreptococcales-Tissierellales	MCWD3	Genus: MCWD3
1a11661e42a984d5e996b7c23db462e4	0	VcPf1N	Unhealthy	Grotta_Vico	VC	White_Cave_Dweller	Cave	Ambient	P.ficiformis	No	Yes	PetrosiaVC	PF5	Bacteria	Firmicutes	Clostridia	Clostridia_vadinBB60	Clostridia_vadinBB60	Clostridia_vadinBB60	Genus: Clostridia_vadinBB60
2477581a4e6d45bc86e0c4b0a6232928	0	VcPf1N	Unhealthy	Grotta_Vico	VC	White_Cave_Dweller	Cave	Ambient	P.ficiformis	No	Yes	PetrosiaVC	PF5	Bacteria	Firmicutes	Clostridia	Peptostreptococcales-Tissierellales	Dethiosulfatibacteraceae	Dethiosulfatibacter	Genus: Dethiosulfatibacter
2b77255db89accf02a257c979151ced9	0	VcPf1N	Unhealthy	Grotta_Vico	VC	White_Cave_Dweller	Cave	Ambient	P.ficiformis	No	Yes	PetrosiaVC	PF5	Bacteria	Firmicutes	Clostridia	Peptostreptococcales-Tissierellales	Peptostreptococcales-Tissierellales	Anaeromicrobium	Genus: Anaeromicrobium
2eda546386fa6876cf0ea6e825228e7b	0	VcPf1N	Unhealthy	Grotta_Vico	VC	White_Cave_Dweller	Cave	Ambient	P.ficiformis	No	Yes	PetrosiaVC	PF5	Bacteria	Firmicutes	Clostridia	Peptostreptococcales-Tissierellales	Fusibacteraceae	Fusibacter	Genus: Fusibacter
306d5796c9f619745f895da6525ed90f	0	VcPf1N	Unhealthy	Grotta_Vico	VC	White_Cave_Dweller	Cave	Ambient	P.ficiformis	No	Yes	PetrosiaVC	PF5	Bacteria	Firmicutes	Clostridia	Peptostreptococcales-Tissierellales	Fusibacteraceae	Fusibacter	Acidaminobacter_sp.
318fa439ed843b516ca9d383abf14489	0	VcPf1N	Unhealthy	Grotta_Vico	VC	White_Cave_Dweller	Cave	Ambient	P.ficiformis	No	Yes	PetrosiaVC	PF5	Bacteria	Firmicutes	Clostridia	Clostridia_vadinBB60	Clostridia_vadinBB60	Clostridia_vadinBB60	Genus: Clostridia_vadinBB60
394afb3f9c455826e07d866108c3f249	0	VcPf1N	Unhealthy	Grotta_Vico	VC	White_Cave_Dweller	Cave	Ambient	P.ficiformis	No	Yes	PetrosiaVC	PF5	Bacteria	Firmicutes	Clostridia	Clostridia_vadinBB60	Clostridia_vadinBB60	Clostridia_vadinBB60	Genus: Clostridia_vadinBB60
4f58db24c3a116bb2f043220801d6850	0	VcPf1N	Unhealthy	Grotta_Vico	VC	White_Cave_Dweller	Cave	Ambient	P.ficiformis	No	Yes	PetrosiaVC	PF5	Bacteria	Firmicutes	Clostridia	Lachnospirales	Lachnospiraceae	Vallitalea	Genus: Vallitalea
5d0766c932fcd757350c39429c6a6d3d	0	VcPf1N	Unhealthy	Grotta_Vico	VC	White_Cave_Dweller	Cave	Ambient	P.ficiformis	No	Yes	PetrosiaVC	PF5	Bacteria	Firmicutes	Clostridia	Clostridia_vadinBB60	Clostridia_vadinBB60	Clostridia_vadinBB60	Genus: Clostridia_vadinBB60
7595b7393c477563cc5d3546aeb0ebfa	0	VcPf1N	Unhealthy	Grotta_Vico	VC	White_Cave_Dweller	Cave	Ambient	P.ficiformis	No	Yes	PetrosiaVC	PF5	Bacteria	Firmicutes	Clostridia	Christensenellales	Christensenellaceae	Family: Christensenellaceae	Family: Christensenellaceae
80c64d01bfa9e6b5a14d6a4266be20e9	0	VcPf1N	Unhealthy	Grotta_Vico	VC	White_Cave_Dweller	Cave	Ambient	P.ficiformis	No	Yes	PetrosiaVC	PF5	Bacteria	Firmicutes	Clostridia	Peptostreptococcales-Tissierellales	Peptostreptococcales-Tissierellales	MCWD3	Genus: MCWD3
8bb564520e6d395ea57d814f2fa73d6a	0	VcPf1N	Unhealthy	Grotta_Vico	VC	White_Cave_Dweller	Cave	Ambient	P.ficiformis	No	Yes	PetrosiaVC	PF5	Bacteria	Firmicutes	Clostridia	Christensenellales	Christensenellaceae	Family: Christensenellaceae	Family: Christensenellaceae
9f265291b20d395e940a21969766b40d	0	VcPf1N	Unhealthy	Grotta_Vico	VC	White_Cave_Dweller	Cave	Ambient	P.ficiformis	No	Yes	PetrosiaVC	PF5	Bacteria	Firmicutes	Clostridia	Oscillospirales	Oscillospiraceae	Colidextribacter	Genus: Colidextribacter
bb000ec9e1c41018b3eb929c4ee81b9a	0	VcPf1N	Unhealthy	Grotta_Vico	VC	White_Cave_Dweller	Cave	Ambient	P.ficiformis	No	Yes	PetrosiaVC	PF5	Bacteria	Firmicutes	Clostridia	Peptostreptococcales-Tissierellales	Fusibacteraceae	Fusibacter	Genus: Fusibacter
e843a5228647bf77d429f54f48be50a4	0	VcPf1N	Unhealthy	Grotta_Vico	VC	White_Cave_Dweller	Cave	Ambient	P.ficiformis	No	Yes	PetrosiaVC	PF5	Bacteria	Firmicutes	Clostridia	Lachnospirales	Order: Lachnospirales	Order: Lachnospirales	Order: Lachnospirales
ffa7be111c19db71f8dcdef91f3f4e67	0	VcPf1N	Unhealthy	Grotta_Vico	VC	White_Cave_Dweller	Cave	Ambient	P.ficiformis	No	Yes	PetrosiaVC	PF5	Bacteria	Firmicutes	Clostridia	Lachnospirales	Defluviitaleaceae	Defluviitaleaceae_UCG-011	Genus: Defluviitaleaceae_UCG-011
032ee68a704884fdd44887d22749a4aa	0	VcPf1N	Unhealthy	Grotta_Vico	VC	White_Cave_Dweller	Cave	Ambient	P.ficiformis	No	Yes	PetrosiaVC	PF5	Bacteria	Gemmatimonadota	BD2-11_terrestrial	BD2-11_terrestrial	BD2-11_terrestrial	BD2-11_terrestrial	Genus: BD2-11_terrestrial
238688ee65500601b3777cf0d69a8999	0	VcPf1N	Unhealthy	Grotta_Vico	VC	White_Cave_Dweller	Cave	Ambient	P.ficiformis	No	Yes	PetrosiaVC	PF5	Bacteria	Gemmatimonadota	BD2-11_terrestrial	BD2-11_terrestrial	BD2-11_terrestrial	BD2-11_terrestrial	Genus: BD2-11_terrestrial
458b20ba69e5160ee718ba03913c6519	0	VcPf1N	Unhealthy	Grotta_Vico	VC	White_Cave_Dweller	Cave	Ambient	P.ficiformis	No	Yes	PetrosiaVC	PF5	Bacteria	Gemmatimonadota	BD2-11_terrestrial	BD2-11_terrestrial	BD2-11_terrestrial	BD2-11_terrestrial	Genus: BD2-11_terrestrial
5f53a69f1a47f802f9dc9cbc6a63c369	0	VcPf1N	Unhealthy	Grotta_Vico	VC	White_Cave_Dweller	Cave	Ambient	P.ficiformis	No	Yes	PetrosiaVC	PF5	Bacteria	Gemmatimonadota	BD2-11_terrestrial	BD2-11_terrestrial	BD2-11_terrestrial	BD2-11_terrestrial	Genus: BD2-11_terrestrial
6b41887fde2e69b3f13a2e4ee14b53ee	0	VcPf1N	Unhealthy	Grotta_Vico	VC	White_Cave_Dweller	Cave	Ambient	P.ficiformis	No	Yes	PetrosiaVC	PF5	Bacteria	Gemmatimonadota	BD2-11_terrestrial	BD2-11_terrestrial	BD2-11_terrestrial	BD2-11_terrestrial	Genus: BD2-11_terrestrial
7002c643193e83563c91d1e6ffc44302	0	VcPf1N	Unhealthy	Grotta_Vico	VC	White_Cave_Dweller	Cave	Ambient	P.ficiformis	No	Yes	PetrosiaVC	PF5	Bacteria	Gemmatimonadota	BD2-11_terrestrial	BD2-11_terrestrial	BD2-11_terrestrial	BD2-11_terrestrial	Genus: BD2-11_terrestrial
8c4e4b4d36057996aeba65eed65467be	0	VcPf1N	Unhealthy	Grotta_Vico	VC	White_Cave_Dweller	Cave	Ambient	P.ficiformis	No	Yes	PetrosiaVC	PF5	Bacteria	Gemmatimonadota	BD2-11_terrestrial	BD2-11_terrestrial	BD2-11_terrestrial	BD2-11_terrestrial	Genus: BD2-11_terrestrial
8cf82a5bca38bb532e9fb7a67356ee96	0	VcPf1N	Unhealthy	Grotta_Vico	VC	White_Cave_Dweller	Cave	Ambient	P.ficiformis	No	Yes	PetrosiaVC	PF5	Bacteria	Gemmatimonadota	BD2-11_terrestrial	BD2-11_terrestrial	BD2-11_terrestrial	BD2-11_terrestrial	Genus: BD2-11_terrestrial
935747ed6bb5bd970f814252153b031c	0	VcPf1N	Unhealthy	Grotta_Vico	VC	White_Cave_Dweller	Cave	Ambient	P.ficiformis	No	Yes	PetrosiaVC	PF5	Bacteria	Gemmatimonadota	BD2-11_terrestrial	BD2-11_terrestrial	BD2-11_terrestrial	BD2-11_terrestrial	Genus: BD2-11_terrestrial
9592ba7b4b360f583c7bf4cef53c2b0d	0	VcPf1N	Unhealthy	Grotta_Vico	VC	White_Cave_Dweller	Cave	Ambient	P.ficiformis	No	Yes	PetrosiaVC	PF5	Bacteria	Gemmatimonadota	PAUC43f_benthic	PAUC43f_benthic	PAUC43f_benthic	PAUC43f_benthic	Genus: PAUC43f_benthic
ec8290fa1070e4ae96c7742285ec2085	0	VcPf1N	Unhealthy	Grotta_Vico	VC	White_Cave_Dweller	Cave	Ambient	P.ficiformis	No	Yes	PetrosiaVC	PF5	Bacteria	Gemmatimonadota	BD2-11_terrestrial	BD2-11_terrestrial	BD2-11_terrestrial	BD2-11_terrestrial	Genus: BD2-11_terrestrial
59e95505dba1d681397ff4ec9c8ce5e2	0	VcPf1N	Unhealthy	Grotta_Vico	VC	White_Cave_Dweller	Cave	Ambient	P.ficiformis	No	Yes	PetrosiaVC	PF5	Bacteria	Kingdom: Bacteria	Kingdom: Bacteria	Kingdom: Bacteria	Kingdom: Bacteria	Kingdom: Bacteria	Kingdom: Bacteria
717311c7391c0f2eab22e578b3b1f594	0	VcPf1N	Unhealthy	Grotta_Vico	VC	White_Cave_Dweller	Cave	Ambient	P.ficiformis	No	Yes	PetrosiaVC	PF5	Bacteria	Kingdom: Bacteria	Kingdom: Bacteria	Kingdom: Bacteria	Kingdom: Bacteria	Kingdom: Bacteria	Kingdom: Bacteria
154a58f3cbd503bcff79e20eba7d1e3f	0	VcPf1N	Unhealthy	Grotta_Vico	VC	White_Cave_Dweller	Cave	Ambient	P.ficiformis	No	Yes	PetrosiaVC	PF5	Bacteria	Myxococcota	Polyangia	Polyangiales	Sandaracinaceae	Family: Sandaracinaceae	Family: Sandaracinaceae
1d59c38dea98282ee2916d2c7ca59ddf	0	VcPf1N	Unhealthy	Grotta_Vico	VC	White_Cave_Dweller	Cave	Ambient	P.ficiformis	No	Yes	PetrosiaVC	PF5	Bacteria	Myxococcota	bacteriap25	bacteriap25	bacteriap25	bacteriap25	Genus: bacteriap25
22e97b07251aeb3e9a9fb551dc59bc11	0	VcPf1N	Unhealthy	Grotta_Vico	VC	White_Cave_Dweller	Cave	Ambient	P.ficiformis	No	Yes	PetrosiaVC	PF5	Bacteria	Myxococcota	Polyangia	Nannocystales	Nannocystaceae	Family: Nannocystaceae	Family: Nannocystaceae
82de14f7753d3d9f18fc6057c53144f4	0	VcPf1N	Unhealthy	Grotta_Vico	VC	White_Cave_Dweller	Cave	Ambient	P.ficiformis	No	Yes	PetrosiaVC	PF5	Bacteria	Myxococcota	Polyangia	Nannocystales	Nannocystaceae	Family: Nannocystaceae	Family: Nannocystaceae
ac68dcea6cf0059b898866a459715b4a	0	VcPf1N	Unhealthy	Grotta_Vico	VC	White_Cave_Dweller	Cave	Ambient	P.ficiformis	No	Yes	PetrosiaVC	PF5	Bacteria	Myxococcota	Myxococcia	Myxococcales	Myxococcaceae	P3OB-42	Genus: P3OB-42
b9d63b73088fbc003282faf7ca96c0a5	0	VcPf1N	Unhealthy	Grotta_Vico	VC	White_Cave_Dweller	Cave	Ambient	P.ficiformis	No	Yes	PetrosiaVC	PF5	Bacteria	Myxococcota	bacteriap25	bacteriap25	bacteriap25	bacteriap25	Genus: bacteriap25
c485796f95bfc5186422aab707465967	0	VcPf1N	Unhealthy	Grotta_Vico	VC	White_Cave_Dweller	Cave	Ambient	P.ficiformis	No	Yes	PetrosiaVC	PF5	Bacteria	Myxococcota	bacteriap25	bacteriap25	bacteriap25	bacteriap25	Genus: bacteriap25
c823de57e600110f152589ccc6ac68b8	0	VcPf1N	Unhealthy	Grotta_Vico	VC	White_Cave_Dweller	Cave	Ambient	P.ficiformis	No	Yes	PetrosiaVC	PF5	Bacteria	Myxococcota	Polyangia	Polyangiales	Eel-36e1D6	Eel-36e1D6	Genus: Eel-36e1D6
e60ca803a3319aa294a87422afd1701d	0	VcPf1N	Unhealthy	Grotta_Vico	VC	White_Cave_Dweller	Cave	Ambient	P.ficiformis	No	Yes	PetrosiaVC	PF5	Bacteria	Myxococcota	Polyangia	Polyangiales	Sandaracinaceae	Sandaracinus	Genus: Sandaracinus
ed58ec54f289199fa07cb649b76671f0	0	VcPf1N	Unhealthy	Grotta_Vico	VC	White_Cave_Dweller	Cave	Ambient	P.ficiformis	No	Yes	PetrosiaVC	PF5	Bacteria	Myxococcota	Polyangia	Nannocystales	Nannocystaceae	Family: Nannocystaceae	Family: Nannocystaceae
f726814575ed2963d588b4ded1db6cc2	0	VcPf1N	Unhealthy	Grotta_Vico	VC	White_Cave_Dweller	Cave	Ambient	P.ficiformis	No	Yes	PetrosiaVC	PF5	Bacteria	Myxococcota	Polyangia	Haliangiales	Haliangiaceae	Haliangium	Genus: Haliangium
1deaba99190b1b0f7d8d304da149f202	0	VcPf1N	Unhealthy	Grotta_Vico	VC	White_Cave_Dweller	Cave	Ambient	P.ficiformis	No	Yes	PetrosiaVC	PF5	Archaea	Nanoarchaeota	Nanoarchaeia	Woesearchaeales	Woesearchaeales	Woesearchaeales	Genus: Woesearchaeales
896038f30a5ec46eabb565fd88b17228	0	VcPf1N	Unhealthy	Grotta_Vico	VC	White_Cave_Dweller	Cave	Ambient	P.ficiformis	No	Yes	PetrosiaVC	PF5	Bacteria	Nitrospinota	P9X2b3D02	P9X2b3D02	P9X2b3D02	P9X2b3D02	Genus: P9X2b3D02
c378f2ebadbf49187d4fe192472299db	0	VcPf1N	Unhealthy	Grotta_Vico	VC	White_Cave_Dweller	Cave	Ambient	P.ficiformis	No	Yes	PetrosiaVC	PF5	Bacteria	Nitrospinota	P9X2b3D02	P9X2b3D02	P9X2b3D02	P9X2b3D02	Genus: P9X2b3D02
15842fec6b7c23a4fbc892cee902e05f	0	VcPf1N	Unhealthy	Grotta_Vico	VC	White_Cave_Dweller	Cave	Ambient	P.ficiformis	No	Yes	PetrosiaVC	PF5	Bacteria	Nitrospirota	Nitrospiria	Nitrospirales	Nitrospiraceae	Nitrospira	Genus: Nitrospira
f829766bfb6ed4c8e50e44ad3fd7d070	0	VcPf1N	Unhealthy	Grotta_Vico	VC	White_Cave_Dweller	Cave	Ambient	P.ficiformis	No	Yes	PetrosiaVC	PF5	Bacteria	Nitrospirota	Nitrospiria	Nitrospirales	Nitrospiraceae	Nitrospira	Genus: Nitrospira
0ce1d68d92b1461c6a35d1b997bd9c10	0	VcPf1N	Unhealthy	Grotta_Vico	VC	White_Cave_Dweller	Cave	Ambient	P.ficiformis	No	Yes	PetrosiaVC	PF5	Bacteria	Patescibacteria	Gracilibacteria	JGI_0000069-P22	JGI_0000069-P22	JGI_0000069-P22	Genus: JGI_0000069-P22
3b19364fae0d407a65ee74cb1fcc98b5	0	VcPf1N	Unhealthy	Grotta_Vico	VC	White_Cave_Dweller	Cave	Ambient	P.ficiformis	No	Yes	PetrosiaVC	PF5	Bacteria	Patescibacteria	Parcubacteria	Candidatus_Kaiserbacteria	Candidatus_Kaiserbacteria	Candidatus_Kaiserbacteria	Genus: Candidatus_Kaiserbacteria
4ecfb5ea3e78a2396df6877204aa2a27	0	VcPf1N	Unhealthy	Grotta_Vico	VC	White_Cave_Dweller	Cave	Ambient	P.ficiformis	No	Yes	PetrosiaVC	PF5	Bacteria	Patescibacteria	Parcubacteria	Candidatus_Campbellbacteria	Candidatus_Campbellbacteria	Candidatus_Campbellbacteria	Genus: Candidatus_Campbellbacteria
57147ed0db4de84c229875fce4e51ec4	0	VcPf1N	Unhealthy	Grotta_Vico	VC	White_Cave_Dweller	Cave	Ambient	P.ficiformis	No	Yes	PetrosiaVC	PF5	Bacteria	Patescibacteria	Parcubacteria	Candidatus_Kaiserbacteria	Candidatus_Kaiserbacteria	Candidatus_Kaiserbacteria	Genus: Candidatus_Kaiserbacteria
58d4003c0f9eab121e778eefb7881fc5	0	VcPf1N	Unhealthy	Grotta_Vico	VC	White_Cave_Dweller	Cave	Ambient	P.ficiformis	No	Yes	PetrosiaVC	PF5	Bacteria	Patescibacteria	Parcubacteria	Candidatus_Moranbacteria	Candidatus_Moranbacteria	Candidatus_Moranbacteria	Genus: Candidatus_Moranbacteria
59ff76a9aef7b5fa2e04419547e7afd7	0	VcPf1N	Unhealthy	Grotta_Vico	VC	White_Cave_Dweller	Cave	Ambient	P.ficiformis	No	Yes	PetrosiaVC	PF5	Bacteria	Patescibacteria	Gracilibacteria	Gracilibacteria	Gracilibacteria	Gracilibacteria	Genus: Gracilibacteria
80fcb125813393d15cd88796a7af0026	0	VcPf1N	Unhealthy	Grotta_Vico	VC	White_Cave_Dweller	Cave	Ambient	P.ficiformis	No	Yes	PetrosiaVC	PF5	Bacteria	Patescibacteria	Gracilibacteria	Gracilibacteria	Gracilibacteria	Gracilibacteria	Genus: Gracilibacteria
0e273566d4831ef207b700781fbe28f1	0	VcPf1N	Unhealthy	Grotta_Vico	VC	White_Cave_Dweller	Cave	Ambient	P.ficiformis	No	Yes	PetrosiaVC	PF5	Bacteria	PAUC34f	PAUC34f	PAUC34f	PAUC34f	PAUC34f	Genus: PAUC34f
4136d1cba01c22d2ee4d8a4db7143079	0	VcPf1N	Unhealthy	Grotta_Vico	VC	White_Cave_Dweller	Cave	Ambient	P.ficiformis	No	Yes	PetrosiaVC	PF5	Bacteria	PAUC34f	PAUC34f	PAUC34f	PAUC34f	PAUC34f	Genus: PAUC34f
5185bdfed34b6744059d1f5db5cbc2f0	0	VcPf1N	Unhealthy	Grotta_Vico	VC	White_Cave_Dweller	Cave	Ambient	P.ficiformis	No	Yes	PetrosiaVC	PF5	Bacteria	PAUC34f	PAUC34f	PAUC34f	PAUC34f	PAUC34f	Genus: PAUC34f
7d5dc7e75f0b3b2026b48231b256f1f1	0	VcPf1N	Unhealthy	Grotta_Vico	VC	White_Cave_Dweller	Cave	Ambient	P.ficiformis	No	Yes	PetrosiaVC	PF5	Bacteria	PAUC34f	PAUC34f	PAUC34f	PAUC34f	PAUC34f	Genus: PAUC34f
83d595bdbceb25bdcd789e1f9a2503a8	0	VcPf1N	Unhealthy	Grotta_Vico	VC	White_Cave_Dweller	Cave	Ambient	P.ficiformis	No	Yes	PetrosiaVC	PF5	Bacteria	PAUC34f	PAUC34f	PAUC34f	PAUC34f	PAUC34f	Genus: PAUC34f
83d7d54d0e2b62ef68ea15611138f35a	0	VcPf1N	Unhealthy	Grotta_Vico	VC	White_Cave_Dweller	Cave	Ambient	P.ficiformis	No	Yes	PetrosiaVC	PF5	Bacteria	PAUC34f	PAUC34f	PAUC34f	PAUC34f	PAUC34f	Genus: PAUC34f
a58386eec744bb1ce83e44be727c6707	0	VcPf1N	Unhealthy	Grotta_Vico	VC	White_Cave_Dweller	Cave	Ambient	P.ficiformis	No	Yes	PetrosiaVC	PF5	Bacteria	PAUC34f	PAUC34f	PAUC34f	PAUC34f	PAUC34f	Genus: PAUC34f
aaae511c19111d459d18a378bc6a68cd	0	VcPf1N	Unhealthy	Grotta_Vico	VC	White_Cave_Dweller	Cave	Ambient	P.ficiformis	No	Yes	PetrosiaVC	PF5	Bacteria	PAUC34f	PAUC34f	PAUC34f	PAUC34f	PAUC34f	Genus: PAUC34f
b3aecd2443ee09c69664f0b67e173ab1	0	VcPf1N	Unhealthy	Grotta_Vico	VC	White_Cave_Dweller	Cave	Ambient	P.ficiformis	No	Yes	PetrosiaVC	PF5	Bacteria	PAUC34f	PAUC34f	PAUC34f	PAUC34f	PAUC34f	Genus: PAUC34f
d5127d3631a165fa06b942e8f1726597	0	VcPf1N	Unhealthy	Grotta_Vico	VC	White_Cave_Dweller	Cave	Ambient	P.ficiformis	No	Yes	PetrosiaVC	PF5	Bacteria	PAUC34f	PAUC34f	PAUC34f	PAUC34f	PAUC34f	Genus: PAUC34f
dbc12c6a7453f621131894fa52b586f0	0	VcPf1N	Unhealthy	Grotta_Vico	VC	White_Cave_Dweller	Cave	Ambient	P.ficiformis	No	Yes	PetrosiaVC	PF5	Bacteria	PAUC34f	PAUC34f	PAUC34f	PAUC34f	PAUC34f	Genus: PAUC34f
01069980b0c4f8be9321c5df1a8055d1	0	VcPf1N	Unhealthy	Grotta_Vico	VC	White_Cave_Dweller	Cave	Ambient	P.ficiformis	No	Yes	PetrosiaVC	PF5	Bacteria	Planctomycetota	Phycisphaerae	Phycisphaerales	Phycisphaeraceae	SM1A02	Genus: SM1A02
010e2233008087252fa9cea623bceb15	0	VcPf1N	Unhealthy	Grotta_Vico	VC	White_Cave_Dweller	Cave	Ambient	P.ficiformis	No	Yes	PetrosiaVC	PF5	Bacteria	Planctomycetota	OM190	OM190	OM190	OM190	Genus: OM190
03f286de2b82ced146236106406f69d8	0	VcPf1N	Unhealthy	Grotta_Vico	VC	White_Cave_Dweller	Cave	Ambient	P.ficiformis	No	Yes	PetrosiaVC	PF5	Bacteria	Planctomycetota	Phycisphaerae	Phycisphaerales	Phycisphaeraceae	SM1A02	Genus: SM1A02
07ef1cdecd818a9f33f84e06323a8a59	0	VcPf1N	Unhealthy	Grotta_Vico	VC	White_Cave_Dweller	Cave	Ambient	P.ficiformis	No	Yes	PetrosiaVC	PF5	Bacteria	Planctomycetota	OM190	OM190	OM190	OM190	Genus: OM190
0c11f1b182275cf2688a18e5f2b9e047	0	VcPf1N	Unhealthy	Grotta_Vico	VC	White_Cave_Dweller	Cave	Ambient	P.ficiformis	No	Yes	PetrosiaVC	PF5	Bacteria	Planctomycetota	Planctomycetes	Pirellulales	Pirellulaceae	Rubripirellula	Genus: Rubripirellula
1055ed190a1b718e48d03db605faef54	0	VcPf1N	Unhealthy	Grotta_Vico	VC	White_Cave_Dweller	Cave	Ambient	P.ficiformis	No	Yes	PetrosiaVC	PF5	Bacteria	Planctomycetota	Planctomycetes	Planctomycetales	Order: Planctomycetales	Order: Planctomycetales	Order: Planctomycetales
117579d77f34833f1c01a247aa2e151b	0	VcPf1N	Unhealthy	Grotta_Vico	VC	White_Cave_Dweller	Cave	Ambient	P.ficiformis	No	Yes	PetrosiaVC	PF5	Bacteria	Planctomycetota	Phycisphaerae	Phycisphaerales	Phycisphaeraceae	SM1A02	Planctomycetaceae_bacterium
176e723ed6dcfd87c78305d0e82d1e71	0	VcPf1N	Unhealthy	Grotta_Vico	VC	White_Cave_Dweller	Cave	Ambient	P.ficiformis	No	Yes	PetrosiaVC	PF5	Bacteria	Planctomycetota	Phycisphaerae	Phycisphaerales	Phycisphaeraceae	SM1A02	Genus: SM1A02
1b511cba558df41f1cbdebb26fbd0839	0	VcPf1N	Unhealthy	Grotta_Vico	VC	White_Cave_Dweller	Cave	Ambient	P.ficiformis	No	Yes	PetrosiaVC	PF5	Bacteria	Planctomycetota	OM190	OM190	OM190	OM190	Genus: OM190
1e8bf1b6efd47969fe86a65ac84047e8	0	VcPf1N	Unhealthy	Grotta_Vico	VC	White_Cave_Dweller	Cave	Ambient	P.ficiformis	No	Yes	PetrosiaVC	PF5	Bacteria	Planctomycetota	Phycisphaerae	Phycisphaerales	Phycisphaeraceae	Urania-1B-19_sediment	Genus: Urania-1B-19_sediment
1f041aec6a9447c2b2228b79441703d0	0	VcPf1N	Unhealthy	Grotta_Vico	VC	White_Cave_Dweller	Cave	Ambient	P.ficiformis	No	Yes	PetrosiaVC	PF5	Bacteria	Planctomycetota	Phycisphaerae	Phycisphaerales	Phycisphaeraceae	JL-ETNP-F27	Genus: JL-ETNP-F27
20268b0877b1512ee4550aac5f4af2b3	0	VcPf1N	Unhealthy	Grotta_Vico	VC	White_Cave_Dweller	Cave	Ambient	P.ficiformis	No	Yes	PetrosiaVC	PF5	Bacteria	Planctomycetota	Phycisphaerae	Phycisphaerales	Phycisphaeraceae	SM1A02	Genus: SM1A02
23697879c3cd6eae2847cfeed2c812d3	0	VcPf1N	Unhealthy	Grotta_Vico	VC	White_Cave_Dweller	Cave	Ambient	P.ficiformis	No	Yes	PetrosiaVC	PF5	Bacteria	Planctomycetota	OM190	OM190	OM190	OM190	Genus: OM190
23e817b1f99d517d870cdd90ccbeeba9	0	VcPf1N	Unhealthy	Grotta_Vico	VC	White_Cave_Dweller	Cave	Ambient	P.ficiformis	No	Yes	PetrosiaVC	PF5	Bacteria	Planctomycetota	Planctomycetes	Pirellulales	Pirellulaceae	Blastopirellula	Genus: Blastopirellula
24a99848b4931a71dc34d2526879edd2	0	VcPf1N	Unhealthy	Grotta_Vico	VC	White_Cave_Dweller	Cave	Ambient	P.ficiformis	No	Yes	PetrosiaVC	PF5	Bacteria	Planctomycetota	Planctomycetes	Pirellulales	Pirellulaceae	Blastopirellula	Genus: Blastopirellula
297d40fdb84dfc39cfe249e32b2b9adf	0	VcPf1N	Unhealthy	Grotta_Vico	VC	White_Cave_Dweller	Cave	Ambient	P.ficiformis	No	Yes	PetrosiaVC	PF5	Bacteria	Planctomycetota	Planctomycetes	Pirellulales	Pirellulaceae	Rhodopirellula	Genus: Rhodopirellula
311680f711cb60bcd75b7abc680ea48a	0	VcPf1N	Unhealthy	Grotta_Vico	VC	White_Cave_Dweller	Cave	Ambient	P.ficiformis	No	Yes	PetrosiaVC	PF5	Bacteria	Planctomycetota	Planctomycetes	Pirellulales	Pirellulaceae	Pir4_lineage	Genus: Pir4_lineage
3aa6d3cec17567833069161d31811238	0	VcPf1N	Unhealthy	Grotta_Vico	VC	White_Cave_Dweller	Cave	Ambient	P.ficiformis	No	Yes	PetrosiaVC	PF5	Bacteria	Planctomycetota	OM190	OM190	OM190	OM190	Genus: OM190
3d7706561c317d16ac5c8bba2f9ef4ec	0	VcPf1N	Unhealthy	Grotta_Vico	VC	White_Cave_Dweller	Cave	Ambient	P.ficiformis	No	Yes	PetrosiaVC	PF5	Bacteria	Planctomycetota	Phycisphaerae	Phycisphaerales	Phycisphaeraceae	Urania-1B-19_sediment	Genus: Urania-1B-19_sediment
3ddb50ff4f46a9eee05b1b2e428e4c79	0	VcPf1N	Unhealthy	Grotta_Vico	VC	White_Cave_Dweller	Cave	Ambient	P.ficiformis	No	Yes	PetrosiaVC	PF5	Bacteria	Planctomycetota	Planctomycetes	Pirellulales	Pirellulaceae	Rhodopirellula	Genus: Rhodopirellula
3de8df4ac44d8f11edb0f5f568f4717d	0	VcPf1N	Unhealthy	Grotta_Vico	VC	White_Cave_Dweller	Cave	Ambient	P.ficiformis	No	Yes	PetrosiaVC	PF5	Bacteria	Planctomycetota	Phycisphaerae	Phycisphaerales	Phycisphaeraceae	SM1A02	Genus: SM1A02
415ced82815271dae773625430504820	0	VcPf1N	Unhealthy	Grotta_Vico	VC	White_Cave_Dweller	Cave	Ambient	P.ficiformis	No	Yes	PetrosiaVC	PF5	Bacteria	Planctomycetota	Planctomycetes	Planctomycetales	Rubinisphaeraceae	Planctomicrobium	Genus: Planctomicrobium
44bad907eda49612253fb18c726cba5f	0	VcPf1N	Unhealthy	Grotta_Vico	VC	White_Cave_Dweller	Cave	Ambient	P.ficiformis	No	Yes	PetrosiaVC	PF5	Bacteria	Planctomycetota	Phycisphaerae	Phycisphaerales	Phycisphaeraceae	Family: Phycisphaeraceae	Family: Phycisphaeraceae
46221f13d39875a72b4c34352d2ee3c3	0	VcPf1N	Unhealthy	Grotta_Vico	VC	White_Cave_Dweller	Cave	Ambient	P.ficiformis	No	Yes	PetrosiaVC	PF5	Bacteria	Planctomycetota	Phycisphaerae	Phycisphaerales	Phycisphaeraceae	SM1A02	Genus: SM1A02
4babbe995883b0a49094e903d55963df	0	VcPf1N	Unhealthy	Grotta_Vico	VC	White_Cave_Dweller	Cave	Ambient	P.ficiformis	No	Yes	PetrosiaVC	PF5	Bacteria	Planctomycetota	OM190	OM190	OM190	OM190	Genus: OM190
51ea200db28ddbf0daae3939a8776db2	0	VcPf1N	Unhealthy	Grotta_Vico	VC	White_Cave_Dweller	Cave	Ambient	P.ficiformis	No	Yes	PetrosiaVC	PF5	Bacteria	Planctomycetota	OM190	OM190	OM190	OM190	Genus: OM190
530a4a4e0e52db939b7b7ae60b9a4f8d	0	VcPf1N	Unhealthy	Grotta_Vico	VC	White_Cave_Dweller	Cave	Ambient	P.ficiformis	No	Yes	PetrosiaVC	PF5	Bacteria	Planctomycetota	Planctomycetes	Pirellulales	Pirellulaceae	Blastopirellula	Genus: Blastopirellula
5420892dd9b90247fd4c2c5a514b66d8	0	VcPf1N	Unhealthy	Grotta_Vico	VC	White_Cave_Dweller	Cave	Ambient	P.ficiformis	No	Yes	PetrosiaVC	PF5	Bacteria	Planctomycetota	Planctomycetes	Planctomycetales	Rubinisphaeraceae	Fuerstia	Genus: Fuerstia
5789942f30fe9a579c7cde6683c4f979	0	VcPf1N	Unhealthy	Grotta_Vico	VC	White_Cave_Dweller	Cave	Ambient	P.ficiformis	No	Yes	PetrosiaVC	PF5	Bacteria	Planctomycetota	OM190	OM190	OM190	OM190	Genus: OM190
5ec6fd107597344e1d9ec1c04ef1d941	0	VcPf1N	Unhealthy	Grotta_Vico	VC	White_Cave_Dweller	Cave	Ambient	P.ficiformis	No	Yes	PetrosiaVC	PF5	Bacteria	Planctomycetota	Planctomycetes	Pirellulales	Pirellulaceae	Pirellula	Genus: Pirellula
642c6703a7ebf7c6db3e46adeed5df9d	0	VcPf1N	Unhealthy	Grotta_Vico	VC	White_Cave_Dweller	Cave	Ambient	P.ficiformis	No	Yes	PetrosiaVC	PF5	Bacteria	Planctomycetota	Phycisphaerae	Phycisphaerales	Phycisphaeraceae	SM1A02	Genus: SM1A02
6aacea0b87050f642facf64283354b86	0	VcPf1N	Unhealthy	Grotta_Vico	VC	White_Cave_Dweller	Cave	Ambient	P.ficiformis	No	Yes	PetrosiaVC	PF5	Bacteria	Planctomycetota	Phycisphaerae	Phycisphaerales	Phycisphaeraceae	SM1A02	Genus: SM1A02
6cf3e74ce1766a0ab1265ac5e392de36	0	VcPf1N	Unhealthy	Grotta_Vico	VC	White_Cave_Dweller	Cave	Ambient	P.ficiformis	No	Yes	PetrosiaVC	PF5	Bacteria	Planctomycetota	Planctomycetes	Planctomycetales	Rubinisphaeraceae	Fuerstia	Genus: Fuerstia
6fd4c2bd0160e726eb67d1677a742a68	0	VcPf1N	Unhealthy	Grotta_Vico	VC	White_Cave_Dweller	Cave	Ambient	P.ficiformis	No	Yes	PetrosiaVC	PF5	Bacteria	Planctomycetota	Planctomycetes	Planctomycetales	Gimesiaceae	Family: Gimesiaceae	Family: Gimesiaceae
704a167ed3534718fb09fb7f45b36506	0	VcPf1N	Unhealthy	Grotta_Vico	VC	White_Cave_Dweller	Cave	Ambient	P.ficiformis	No	Yes	PetrosiaVC	PF5	Bacteria	Planctomycetota	OM190	OM190	OM190	OM190	Genus: OM190
7149621c948f7b778f0a245042a30993	0	VcPf1N	Unhealthy	Grotta_Vico	VC	White_Cave_Dweller	Cave	Ambient	P.ficiformis	No	Yes	PetrosiaVC	PF5	Bacteria	Planctomycetota	Phycisphaerae	Phycisphaerales	Phycisphaeraceae	SM1A02	Genus: SM1A02
729dfaa7c95475081e3392be08c8190a	0	VcPf1N	Unhealthy	Grotta_Vico	VC	White_Cave_Dweller	Cave	Ambient	P.ficiformis	No	Yes	PetrosiaVC	PF5	Bacteria	Planctomycetota	Planctomycetes	Pirellulales	Pirellulaceae	Pir4_lineage	Genus: Pir4_lineage
81ead9bca402928fd6dbfaa139f40fb4	0	VcPf1N	Unhealthy	Grotta_Vico	VC	White_Cave_Dweller	Cave	Ambient	P.ficiformis	No	Yes	PetrosiaVC	PF5	Bacteria	Planctomycetota	Phycisphaerae	Phycisphaerales	Phycisphaeraceae	Family: Phycisphaeraceae	Family: Phycisphaeraceae
836106ff677d9ef478ec28b8c0d1322d	0	VcPf1N	Unhealthy	Grotta_Vico	VC	White_Cave_Dweller	Cave	Ambient	P.ficiformis	No	Yes	PetrosiaVC	PF5	Bacteria	Planctomycetota	Phycisphaerae	Phycisphaerales	Phycisphaeraceae	Family: Phycisphaeraceae	Family: Phycisphaeraceae
87e786eca56d569948e03a7f578854bf	0	VcPf1N	Unhealthy	Grotta_Vico	VC	White_Cave_Dweller	Cave	Ambient	P.ficiformis	No	Yes	PetrosiaVC	PF5	Bacteria	Planctomycetota	Phycisphaerae	Phycisphaerales	Phycisphaeraceae	SM1A02	Genus: SM1A02
8d96d4f81f3a2806559c5d5e3527b461	0	VcPf1N	Unhealthy	Grotta_Vico	VC	White_Cave_Dweller	Cave	Ambient	P.ficiformis	No	Yes	PetrosiaVC	PF5	Bacteria	Planctomycetota	Phycisphaerae	Phycisphaerales	Phycisphaeraceae	SM1A02	Genus: SM1A02
94815263c8bb25981faf807d2caa7600	0	VcPf1N	Unhealthy	Grotta_Vico	VC	White_Cave_Dweller	Cave	Ambient	P.ficiformis	No	Yes	PetrosiaVC	PF5	Bacteria	Planctomycetota	Planctomycetes	Pirellulales	Pirellulaceae	Blastopirellula	Genus: Blastopirellula
9c07a0731c1761ab9fbb000dd5feac10	0	VcPf1N	Unhealthy	Grotta_Vico	VC	White_Cave_Dweller	Cave	Ambient	P.ficiformis	No	Yes	PetrosiaVC	PF5	Bacteria	Planctomycetota	Phycisphaerae	Phycisphaerales	Phycisphaeraceae	SM1A02	Genus: SM1A02
b2e81668c9433a3acb2384f948f3c0de	0	VcPf1N	Unhealthy	Grotta_Vico	VC	White_Cave_Dweller	Cave	Ambient	P.ficiformis	No	Yes	PetrosiaVC	PF5	Bacteria	Planctomycetota	Planctomycetes	Pirellulales	Pirellulaceae	Pirellula	Genus: Pirellula
c12810df37be9dfb003365e2dff02b8d	0	VcPf1N	Unhealthy	Grotta_Vico	VC	White_Cave_Dweller	Cave	Ambient	P.ficiformis	No	Yes	PetrosiaVC	PF5	Bacteria	Planctomycetota	Planctomycetes	Pirellulales	Pirellulaceae	Bythopirellula	Genus: Bythopirellula
c2b264b8f91c93889b55d9996c105a26	0	VcPf1N	Unhealthy	Grotta_Vico	VC	White_Cave_Dweller	Cave	Ambient	P.ficiformis	No	Yes	PetrosiaVC	PF5	Bacteria	Planctomycetota	Planctomycetes	Pirellulales	Pirellulaceae	Pirellula	Genus: Pirellula
c42a7e07c614f75070ae3d9426f8d8d6	0	VcPf1N	Unhealthy	Grotta_Vico	VC	White_Cave_Dweller	Cave	Ambient	P.ficiformis	No	Yes	PetrosiaVC	PF5	Bacteria	Planctomycetota	OM190	OM190	OM190	OM190	Genus: OM190
cedd7e10c82dccea14c3d8fb8d8d6060	0	VcPf1N	Unhealthy	Grotta_Vico	VC	White_Cave_Dweller	Cave	Ambient	P.ficiformis	No	Yes	PetrosiaVC	PF5	Bacteria	Planctomycetota	Planctomycetes	Planctomycetales	Gimesiaceae	Family: Gimesiaceae	Family: Gimesiaceae
da602ca114f4d650990b0397f5477f73	0	VcPf1N	Unhealthy	Grotta_Vico	VC	White_Cave_Dweller	Cave	Ambient	P.ficiformis	No	Yes	PetrosiaVC	PF5	Bacteria	Planctomycetota	Phycisphaerae	Phycisphaerales	Phycisphaeraceae	SM1A02	Genus: SM1A02
e34e8f65dfbd6a1edb9af50d7af54fe5	0	VcPf1N	Unhealthy	Grotta_Vico	VC	White_Cave_Dweller	Cave	Ambient	P.ficiformis	No	Yes	PetrosiaVC	PF5	Bacteria	Planctomycetota	OM190	OM190	OM190	OM190	Genus: OM190
ee60dd5e9eb1598f3e3499cacfa4fbe1	0	VcPf1N	Unhealthy	Grotta_Vico	VC	White_Cave_Dweller	Cave	Ambient	P.ficiformis	No	Yes	PetrosiaVC	PF5	Bacteria	Planctomycetota	Planctomycetes	Planctomycetales	Gimesiaceae	Gimesia	Genus: Gimesia
f2e1099764cc95594ead5cc688bde50d	0	VcPf1N	Unhealthy	Grotta_Vico	VC	White_Cave_Dweller	Cave	Ambient	P.ficiformis	No	Yes	PetrosiaVC	PF5	Bacteria	Planctomycetota	Planctomycetes	Pirellulales	Pirellulaceae	Pir4_lineage	Genus: Pir4_lineage
f6fd294a2c7a65c329e954091ffb91a0	0	VcPf1N	Unhealthy	Grotta_Vico	VC	White_Cave_Dweller	Cave	Ambient	P.ficiformis	No	Yes	PetrosiaVC	PF5	Bacteria	Planctomycetota	OM190	OM190	OM190	OM190	Genus: OM190
fc175afb404dca822b69e33f8d31482b	0	VcPf1N	Unhealthy	Grotta_Vico	VC	White_Cave_Dweller	Cave	Ambient	P.ficiformis	No	Yes	PetrosiaVC	PF5	Bacteria	Planctomycetota	Planctomycetes	Pirellulales	Pirellulaceae	Rubripirellula	Genus: Rubripirellula
fcb8ba1d6a052981811ca1440c6c3680	0	VcPf1N	Unhealthy	Grotta_Vico	VC	White_Cave_Dweller	Cave	Ambient	P.ficiformis	No	Yes	PetrosiaVC	PF5	Bacteria	Planctomycetota	Planctomycetes	Pirellulales	Pirellulaceae	Pirellula	Genus: Pirellula
fea79878ea06ce062ab91316251d63ed	0	VcPf1N	Unhealthy	Grotta_Vico	VC	White_Cave_Dweller	Cave	Ambient	P.ficiformis	No	Yes	PetrosiaVC	PF5	Bacteria	Planctomycetota	Planctomycetes	Pirellulales	Pirellulaceae	Blastopirellula	Planctomyces_sp.
0bce9e193dd20323ff34751f8711d95e	0	VcPf1N	Unhealthy	Grotta_Vico	VC	White_Cave_Dweller	Cave	Ambient	P.ficiformis	No	Yes	PetrosiaVC	PF5	Bacteria	Poribacteria	Poribacteria	Poribacteria	Poribacteria	Poribacteria	Genus: Poribacteria
1f2a17b74e6ce187cdf5d996d87c6314	0	VcPf1N	Unhealthy	Grotta_Vico	VC	White_Cave_Dweller	Cave	Ambient	P.ficiformis	No	Yes	PetrosiaVC	PF5	Bacteria	Poribacteria	Poribacteria	Poribacteria	Poribacteria	Poribacteria	Genus: Poribacteria
22284d2280f65f10fb2a39811ed8e948	0	VcPf1N	Unhealthy	Grotta_Vico	VC	White_Cave_Dweller	Cave	Ambient	P.ficiformis	No	Yes	PetrosiaVC	PF5	Bacteria	Poribacteria	Poribacteria	Poribacteria	Poribacteria	Poribacteria	Genus: Poribacteria
3f39ad496b0e0a51b64379b6c55161ea	0	VcPf1N	Unhealthy	Grotta_Vico	VC	White_Cave_Dweller	Cave	Ambient	P.ficiformis	No	Yes	PetrosiaVC	PF5	Bacteria	Poribacteria	Poribacteria	Poribacteria	Poribacteria	Poribacteria	Genus: Poribacteria
75640cc6c351913333abf8415a3af6e8	0	VcPf1N	Unhealthy	Grotta_Vico	VC	White_Cave_Dweller	Cave	Ambient	P.ficiformis	No	Yes	PetrosiaVC	PF5	Bacteria	Poribacteria	Poribacteria	Poribacteria	Poribacteria	Poribacteria	Candidatus_Poribacteria
8fe9c7e3e9c4bf813f181ba28b0f1c79	0	VcPf1N	Unhealthy	Grotta_Vico	VC	White_Cave_Dweller	Cave	Ambient	P.ficiformis	No	Yes	PetrosiaVC	PF5	Bacteria	Poribacteria	Poribacteria	Poribacteria	Poribacteria	Poribacteria	Genus: Poribacteria
9c7cd648e6f6c1110125108d2bb9e7b4	0	VcPf1N	Unhealthy	Grotta_Vico	VC	White_Cave_Dweller	Cave	Ambient	P.ficiformis	No	Yes	PetrosiaVC	PF5	Bacteria	Poribacteria	Poribacteria	Poribacteria	Poribacteria	Poribacteria	Genus: Poribacteria
b34559084504b453f6bc8d5e7c9d908c	0	VcPf1N	Unhealthy	Grotta_Vico	VC	White_Cave_Dweller	Cave	Ambient	P.ficiformis	No	Yes	PetrosiaVC	PF5	Bacteria	Poribacteria	Poribacteria	Poribacteria	Poribacteria	Poribacteria	Genus: Poribacteria
ba7d4b177de2f7d68254e7dcb0be4a17	0	VcPf1N	Unhealthy	Grotta_Vico	VC	White_Cave_Dweller	Cave	Ambient	P.ficiformis	No	Yes	PetrosiaVC	PF5	Bacteria	Poribacteria	Poribacteria	Poribacteria	Poribacteria	Poribacteria	Genus: Poribacteria
bd2eb86c8d95cb19ebb6932471b3a8f7	0	VcPf1N	Unhealthy	Grotta_Vico	VC	White_Cave_Dweller	Cave	Ambient	P.ficiformis	No	Yes	PetrosiaVC	PF5	Bacteria	Poribacteria	Poribacteria	Poribacteria	Poribacteria	Poribacteria	Genus: Poribacteria
c68bffda7706f7e2c085ce50327b8889	0	VcPf1N	Unhealthy	Grotta_Vico	VC	White_Cave_Dweller	Cave	Ambient	P.ficiformis	No	Yes	PetrosiaVC	PF5	Bacteria	Poribacteria	Poribacteria	Poribacteria	Poribacteria	Poribacteria	Genus: Poribacteria
c97ffc712940945ec782679b9d128371	0	VcPf1N	Unhealthy	Grotta_Vico	VC	White_Cave_Dweller	Cave	Ambient	P.ficiformis	No	Yes	PetrosiaVC	PF5	Bacteria	Poribacteria	Poribacteria	Poribacteria	Poribacteria	Poribacteria	Genus: Poribacteria
ccc040b10c0469b1b05d7c58495db6ee	0	VcPf1N	Unhealthy	Grotta_Vico	VC	White_Cave_Dweller	Cave	Ambient	P.ficiformis	No	Yes	PetrosiaVC	PF5	Bacteria	Poribacteria	Poribacteria	Poribacteria	Poribacteria	Poribacteria	Candidatus_Poribacteria
f7221c886f2817b6546c7c07f0129989	0	VcPf1N	Unhealthy	Grotta_Vico	VC	White_Cave_Dweller	Cave	Ambient	P.ficiformis	No	Yes	PetrosiaVC	PF5	Bacteria	Poribacteria	Poribacteria	Poribacteria	Poribacteria	Poribacteria	Candidatus_Poribacteria
001b3d5c9a4fadbb8ca1599cc928a6b2	0	VcPf1N	Unhealthy	Grotta_Vico	VC	White_Cave_Dweller	Cave	Ambient	P.ficiformis	No	Yes	PetrosiaVC	PF5	Bacteria	Proteobacteria	Gammaproteobacteria	Pseudomonadales	Halieaceae	Family: Halieaceae	Family: Halieaceae
008286686aca4bdccfc8b9f7f96bf6d4	0	VcPf1N	Unhealthy	Grotta_Vico	VC	White_Cave_Dweller	Cave	Ambient	P.ficiformis	No	Yes	PetrosiaVC	PF5	Bacteria	Proteobacteria	Alphaproteobacteria	Sneathiellales	Sneathiellaceae	Sneathiella	Genus: Sneathiella
02e28306d8cfbe5e8821025796b6c0b0	0	VcPf1N	Unhealthy	Grotta_Vico	VC	White_Cave_Dweller	Cave	Ambient	P.ficiformis	No	Yes	PetrosiaVC	PF5	Bacteria	Proteobacteria	Alphaproteobacteria	Micavibrionales	Micavibrionaceae	Family: Micavibrionaceae	Family: Micavibrionaceae
0426a18565e9c3e29076b37afce134f3	0	VcPf1N	Unhealthy	Grotta_Vico	VC	White_Cave_Dweller	Cave	Ambient	P.ficiformis	No	Yes	PetrosiaVC	PF5	Bacteria	Proteobacteria	Gammaproteobacteria	Arenicellales	Arenicellaceae	Arenicella	Genus: Arenicella
0728934ec46cd599f6535e8634bea95b	0	VcPf1N	Unhealthy	Grotta_Vico	VC	White_Cave_Dweller	Cave	Ambient	P.ficiformis	No	Yes	PetrosiaVC	PF5	Bacteria	Proteobacteria	Alphaproteobacteria	Rhodobacterales	Rhodobacteraceae	Family: Rhodobacteraceae	Family: Rhodobacteraceae
08f2970ca3eedad932f141c1731b98da	0	VcPf1N	Unhealthy	Grotta_Vico	VC	White_Cave_Dweller	Cave	Ambient	P.ficiformis	No	Yes	PetrosiaVC	PF5	Bacteria	Proteobacteria	Alphaproteobacteria	Rhizobiales	Stappiaceae	Pseudovibrio	Pseudovibrio_sp.
097a4a3db8ac759c49937764236c210a	0	VcPf1N	Unhealthy	Grotta_Vico	VC	White_Cave_Dweller	Cave	Ambient	P.ficiformis	No	Yes	PetrosiaVC	PF5	Bacteria	Proteobacteria	Alphaproteobacteria	Rickettsiales	SM2D12	SM2D12	Genus: SM2D12
0dabe4d6b4d7e0fe390876196a81f7c9	0	VcPf1N	Unhealthy	Grotta_Vico	VC	White_Cave_Dweller	Cave	Ambient	P.ficiformis	No	Yes	PetrosiaVC	PF5	Bacteria	Proteobacteria	Gammaproteobacteria	Gammaproteobacteria_Incertae_Sedis	Order: Gammaproteobacteria_Incertae_Sedis	Order: Gammaproteobacteria_Incertae_Sedis	Order: Gammaproteobacteria_Incertae_Sedis
0dff31271a5dac378bdbb0a0ee7ed2a4	0	VcPf1N	Unhealthy	Grotta_Vico	VC	White_Cave_Dweller	Cave	Ambient	P.ficiformis	No	Yes	PetrosiaVC	PF5	Bacteria	Proteobacteria	Alphaproteobacteria	Micavibrionales	Micavibrionaceae	Family: Micavibrionaceae	Family: Micavibrionaceae
0f35e770961d3997e047a840dd199dc1	0	VcPf1N	Unhealthy	Grotta_Vico	VC	White_Cave_Dweller	Cave	Ambient	P.ficiformis	No	Yes	PetrosiaVC	PF5	Bacteria	Proteobacteria	Alphaproteobacteria	Puniceispirillales	Puniceispirillales_Incertae_Sedis	Constrictibacter	Genus: Constrictibacter
11061fb372c346f106a49aa0eddb2205	0	VcPf1N	Unhealthy	Grotta_Vico	VC	White_Cave_Dweller	Cave	Ambient	P.ficiformis	No	Yes	PetrosiaVC	PF5	Bacteria	Proteobacteria	Gammaproteobacteria	Class: Gammaproteobacteria	Class: Gammaproteobacteria	Class: Gammaproteobacteria	Class: Gammaproteobacteria
128a1288f7d748bc62a55942f0794d2c	0	VcPf1N	Unhealthy	Grotta_Vico	VC	White_Cave_Dweller	Cave	Ambient	P.ficiformis	No	Yes	PetrosiaVC	PF5	Bacteria	Proteobacteria	Alphaproteobacteria	Rhodospirillales	Order: Rhodospirillales	Order: Rhodospirillales	Order: Rhodospirillales
13c523f47c87463d9c408b41d3f0755b	0	VcPf1N	Unhealthy	Grotta_Vico	VC	White_Cave_Dweller	Cave	Ambient	P.ficiformis	No	Yes	PetrosiaVC	PF5	Bacteria	Proteobacteria	Gammaproteobacteria	Pseudomonadales	OM182_clade	OM182_clade	Genus: OM182_clade
17fe28de5ff36956438136d4a7ddc775	0	VcPf1N	Unhealthy	Grotta_Vico	VC	White_Cave_Dweller	Cave	Ambient	P.ficiformis	No	Yes	PetrosiaVC	PF5	Bacteria	Proteobacteria	Alphaproteobacteria	Caulobacterales	Hyphomonadaceae	Family: Hyphomonadaceae	Family: Hyphomonadaceae
1e062f03e3cad4e7491be66eaa6f531f	0	VcPf1N	Unhealthy	Grotta_Vico	VC	White_Cave_Dweller	Cave	Ambient	P.ficiformis	No	Yes	PetrosiaVC	PF5	Bacteria	Proteobacteria	Alphaproteobacteria	Rhodobacterales	Rhodobacteraceae	Family: Rhodobacteraceae	Family: Rhodobacteraceae
1fcc27acd6671e3d7b53c1728e0b69a4	0	VcPf1N	Unhealthy	Grotta_Vico	VC	White_Cave_Dweller	Cave	Ambient	P.ficiformis	No	Yes	PetrosiaVC	PF5	Bacteria	Proteobacteria	Gammaproteobacteria	Pseudomonadales	Spongiibacteraceae	Family: Spongiibacteraceae	Family: Spongiibacteraceae
203c6df9b41c402cd1c0c8b96533b9b4	0	VcPf1N	Unhealthy	Grotta_Vico	VC	White_Cave_Dweller	Cave	Ambient	P.ficiformis	No	Yes	PetrosiaVC	PF5	Bacteria	Proteobacteria	Alphaproteobacteria	AT-s3-44	AT-s3-44	AT-s3-44	Genus: AT-s3-44
23cb28d19691142302366caf7a563860	0	VcPf1N	Unhealthy	Grotta_Vico	VC	White_Cave_Dweller	Cave	Ambient	P.ficiformis	No	Yes	PetrosiaVC	PF5	Bacteria	Proteobacteria	Alphaproteobacteria	Rhodobacterales	Rhodobacteraceae	Family: Rhodobacteraceae	Family: Rhodobacteraceae
28367fe4b107339ab27aeaa66cadcb31	0	VcPf1N	Unhealthy	Grotta_Vico	VC	White_Cave_Dweller	Cave	Ambient	P.ficiformis	No	Yes	PetrosiaVC	PF5	Bacteria	Proteobacteria	Gammaproteobacteria	Gammaproteobacteria_Incertae_Sedis	Order: Gammaproteobacteria_Incertae_Sedis	Order: Gammaproteobacteria_Incertae_Sedis	Order: Gammaproteobacteria_Incertae_Sedis
2b89e4b5bd524713a7e68f6002b95c56	0	VcPf1N	Unhealthy	Grotta_Vico	VC	White_Cave_Dweller	Cave	Ambient	P.ficiformis	No	Yes	PetrosiaVC	PF5	Bacteria	Proteobacteria	Gammaproteobacteria	Pseudomonadales	KI89A_clade	KI89A_clade	Genus: KI89A_clade
2cbfbad98b7e5766d976b784107ea5de	0	VcPf1N	Unhealthy	Grotta_Vico	VC	White_Cave_Dweller	Cave	Ambient	P.ficiformis	No	Yes	PetrosiaVC	PF5	Bacteria	Proteobacteria	Alphaproteobacteria	Rhizobiales	Rhizobiaceae	Family: Rhizobiaceae	Family: Rhizobiaceae
2e7cb4eceb6e7618dfa54e60cf741ddc	0	VcPf1N	Unhealthy	Grotta_Vico	VC	White_Cave_Dweller	Cave	Ambient	P.ficiformis	No	Yes	PetrosiaVC	PF5	Bacteria	Proteobacteria	Alphaproteobacteria	Rickettsiales	SM2D12	SM2D12	Genus: SM2D12
340628b194194f8f4ccce40f6ef56da1	0	VcPf1N	Unhealthy	Grotta_Vico	VC	White_Cave_Dweller	Cave	Ambient	P.ficiformis	No	Yes	PetrosiaVC	PF5	Bacteria	Proteobacteria	Gammaproteobacteria	Enterobacterales	Alteromonadaceae	Family: Alteromonadaceae	Family: Alteromonadaceae
35e4ebe19fcb6f560a886fbfe523270b	0	VcPf1N	Unhealthy	Grotta_Vico	VC	White_Cave_Dweller	Cave	Ambient	P.ficiformis	No	Yes	PetrosiaVC	PF5	Bacteria	Proteobacteria	Gammaproteobacteria	pItb-vmat-80	pItb-vmat-80	pItb-vmat-80	Genus: pItb-vmat-80
37138a65bd619e5b624eb08a7fda37ed	0	VcPf1N	Unhealthy	Grotta_Vico	VC	White_Cave_Dweller	Cave	Ambient	P.ficiformis	No	Yes	PetrosiaVC	PF5	Bacteria	Proteobacteria	Alphaproteobacteria	Micavibrionales	Micavibrionaceae	Family: Micavibrionaceae	Family: Micavibrionaceae
3b720586feb7d3862a30bce8304b39dd	0	VcPf1N	Unhealthy	Grotta_Vico	VC	White_Cave_Dweller	Cave	Ambient	P.ficiformis	No	Yes	PetrosiaVC	PF5	Bacteria	Proteobacteria	Alphaproteobacteria	Class: Alphaproteobacteria	Class: Alphaproteobacteria	Class: Alphaproteobacteria	Class: Alphaproteobacteria
3ebd7cb736463d8c51094069d59b96b7	0	VcPf1N	Unhealthy	Grotta_Vico	VC	White_Cave_Dweller	Cave	Ambient	P.ficiformis	No	Yes	PetrosiaVC	PF5	Bacteria	Proteobacteria	Alphaproteobacteria	Rhodobacterales	Rhodobacteraceae	Family: Rhodobacteraceae	Family: Rhodobacteraceae
3f379efe434351be8641ea6692aeb246	0	VcPf1N	Unhealthy	Grotta_Vico	VC	White_Cave_Dweller	Cave	Ambient	P.ficiformis	No	Yes	PetrosiaVC	PF5	Bacteria	Proteobacteria	Alphaproteobacteria	Sneathiellales	Sneathiellaceae	Sneathiella	Genus: Sneathiella
400b1f12cf62e2c8bb057b136b41c62d	0	VcPf1N	Unhealthy	Grotta_Vico	VC	White_Cave_Dweller	Cave	Ambient	P.ficiformis	No	Yes	PetrosiaVC	PF5	Bacteria	Proteobacteria	Gammaproteobacteria	Burkholderiales	Burkholderiaceae	Limnobacter	Genus: Limnobacter
405bce700eddfa08dcea8b4e38804aca	0	VcPf1N	Unhealthy	Grotta_Vico	VC	White_Cave_Dweller	Cave	Ambient	P.ficiformis	No	Yes	PetrosiaVC	PF5	Bacteria	Proteobacteria	Gammaproteobacteria	Enterobacterales	Colwelliaceae	Thalassotalea	Genus: Thalassotalea
4200f4216de08fe1eb8d85f0202273a4	0	VcPf1N	Unhealthy	Grotta_Vico	VC	White_Cave_Dweller	Cave	Ambient	P.ficiformis	No	Yes	PetrosiaVC	PF5	Bacteria	Proteobacteria	Gammaproteobacteria	Class: Gammaproteobacteria	Class: Gammaproteobacteria	Class: Gammaproteobacteria	Class: Gammaproteobacteria
42018da12a403e11b25a7b0c9cf0074a	0	VcPf1N	Unhealthy	Grotta_Vico	VC	White_Cave_Dweller	Cave	Ambient	P.ficiformis	No	Yes	PetrosiaVC	PF5	Bacteria	Proteobacteria	Alphaproteobacteria	Class: Alphaproteobacteria	Class: Alphaproteobacteria	Class: Alphaproteobacteria	Class: Alphaproteobacteria
43373877d023006f55ff6a03ddf9f5a8	0	VcPf1N	Unhealthy	Grotta_Vico	VC	White_Cave_Dweller	Cave	Ambient	P.ficiformis	No	Yes	PetrosiaVC	PF5	Bacteria	Proteobacteria	Alphaproteobacteria	Caulobacterales	Hyphomonadaceae	Family: Hyphomonadaceae	Family: Hyphomonadaceae
452f03ebe00e207cad8f0372a57deb3d	0	VcPf1N	Unhealthy	Grotta_Vico	VC	White_Cave_Dweller	Cave	Ambient	P.ficiformis	No	Yes	PetrosiaVC	PF5	Bacteria	Proteobacteria	Alphaproteobacteria	Rhodobacterales	Rhodobacteraceae	Family: Rhodobacteraceae	Family: Rhodobacteraceae
45a1d7ba5b708fa1e28be3bc4540af22	0	VcPf1N	Unhealthy	Grotta_Vico	VC	White_Cave_Dweller	Cave	Ambient	P.ficiformis	No	Yes	PetrosiaVC	PF5	Bacteria	Proteobacteria	Gammaproteobacteria	Pseudomonadales	KI89A_clade	KI89A_clade	Genus: KI89A_clade
45ba86fcfed31e574af10134582d4fdd	0	VcPf1N	Unhealthy	Grotta_Vico	VC	White_Cave_Dweller	Cave	Ambient	P.ficiformis	No	Yes	PetrosiaVC	PF5	Bacteria	Proteobacteria	Gammaproteobacteria	Enterobacterales	Vibrionaceae	Vibrio	Vibrio_mediterranei
4847ba37083a4e2fca5afc307138275a	0	VcPf1N	Unhealthy	Grotta_Vico	VC	White_Cave_Dweller	Cave	Ambient	P.ficiformis	No	Yes	PetrosiaVC	PF5	Bacteria	Proteobacteria	Gammaproteobacteria	Pseudomonadales	Halieaceae	Halioglobus	Genus: Halioglobus
49d2ff9c48200a1c2bcff616b470099a	0	VcPf1N	Unhealthy	Grotta_Vico	VC	White_Cave_Dweller	Cave	Ambient	P.ficiformis	No	Yes	PetrosiaVC	PF5	Bacteria	Proteobacteria	Alphaproteobacteria	Rhodobacterales	Rhodobacteraceae	Family: Rhodobacteraceae	Family: Rhodobacteraceae
5290a8adb37df9cda667a5191872b660	0	VcPf1N	Unhealthy	Grotta_Vico	VC	White_Cave_Dweller	Cave	Ambient	P.ficiformis	No	Yes	PetrosiaVC	PF5	Bacteria	Proteobacteria	Alphaproteobacteria	Defluviicoccales	Order: Defluviicoccales	Order: Defluviicoccales	Order: Defluviicoccales
57434f2c5e1b7653f59ab8f055da50d6	0	VcPf1N	Unhealthy	Grotta_Vico	VC	White_Cave_Dweller	Cave	Ambient	P.ficiformis	No	Yes	PetrosiaVC	PF5	Bacteria	Proteobacteria	Gammaproteobacteria	Arenicellales	Arenicellaceae	HTCC5015	Genus: HTCC5015
57f45003e7532e653dbc2fd5cf9144ef	0	VcPf1N	Unhealthy	Grotta_Vico	VC	White_Cave_Dweller	Cave	Ambient	P.ficiformis	No	Yes	PetrosiaVC	PF5	Bacteria	Proteobacteria	Gammaproteobacteria	Pseudomonadales	KI89A_clade	KI89A_clade	Genus: KI89A_clade
5d47f357d7e21c75ae27eae867ff2524	0	VcPf1N	Unhealthy	Grotta_Vico	VC	White_Cave_Dweller	Cave	Ambient	P.ficiformis	No	Yes	PetrosiaVC	PF5	Bacteria	Proteobacteria	Alphaproteobacteria	Rhizobiales	Stappiaceae	Labrenzia	Genus: Labrenzia
5f21d9561ecaca9224889bd91d4e40b7	0	VcPf1N	Unhealthy	Grotta_Vico	VC	White_Cave_Dweller	Cave	Ambient	P.ficiformis	No	Yes	PetrosiaVC	PF5	Bacteria	Proteobacteria	Alphaproteobacteria	Parvibaculales	Parvibaculaceae	Family: Parvibaculaceae	Family: Parvibaculaceae
5f2347cf7d038fe9a5a6acd05fa68ab5	0	VcPf1N	Unhealthy	Grotta_Vico	VC	White_Cave_Dweller	Cave	Ambient	P.ficiformis	No	Yes	PetrosiaVC	PF5	Bacteria	Proteobacteria	Alphaproteobacteria	Caulobacterales	Parvularculaceae	Parvularcula	Genus: Parvularcula
5f758a4eba5930b6097b65a4684e6da6	0	VcPf1N	Unhealthy	Grotta_Vico	VC	White_Cave_Dweller	Cave	Ambient	P.ficiformis	No	Yes	PetrosiaVC	PF5	Bacteria	Proteobacteria	Gammaproteobacteria	Burkholderiales	Burkholderiaceae	Limnobacter	Genus: Limnobacter
5f7aaf4212fa91824b26ab00d6d6fe3b	0	VcPf1N	Unhealthy	Grotta_Vico	VC	White_Cave_Dweller	Cave	Ambient	P.ficiformis	No	Yes	PetrosiaVC	PF5	Bacteria	Proteobacteria	Alphaproteobacteria	Caulobacterales	Hyphomonadaceae	Family: Hyphomonadaceae	Family: Hyphomonadaceae
6037b000f087732b431bc1a946661060	0	VcPf1N	Unhealthy	Grotta_Vico	VC	White_Cave_Dweller	Cave	Ambient	P.ficiformis	No	Yes	PetrosiaVC	PF5	Bacteria	Proteobacteria	Gammaproteobacteria	Ectothiorhodospirales	Ectothiorhodospiraceae	Family: Ectothiorhodospiraceae	Family: Ectothiorhodospiraceae
6641fd66d5fc27db144e7a93786136d4	0	VcPf1N	Unhealthy	Grotta_Vico	VC	White_Cave_Dweller	Cave	Ambient	P.ficiformis	No	Yes	PetrosiaVC	PF5	Bacteria	Proteobacteria	Alphaproteobacteria	Puniceispirillales	EF100-94H03	EF100-94H03	Genus: EF100-94H03
68a2952c4e5581e206b6ee9ebfb856f6	0	VcPf1N	Unhealthy	Grotta_Vico	VC	White_Cave_Dweller	Cave	Ambient	P.ficiformis	No	Yes	PetrosiaVC	PF5	Bacteria	Proteobacteria	Gammaproteobacteria	Pseudomonadales	Halieaceae	Halioglobus	Genus: Halioglobus
68af27fb0ea0f82062d30574fe7ea845	0	VcPf1N	Unhealthy	Grotta_Vico	VC	White_Cave_Dweller	Cave	Ambient	P.ficiformis	No	Yes	PetrosiaVC	PF5	Bacteria	Proteobacteria	Alphaproteobacteria	Micavibrionales	Micavibrionaceae	Family: Micavibrionaceae	Family: Micavibrionaceae
68e5683f6f2ff945829117d16f954707	0	VcPf1N	Unhealthy	Grotta_Vico	VC	White_Cave_Dweller	Cave	Ambient	P.ficiformis	No	Yes	PetrosiaVC	PF5	Bacteria	Proteobacteria	Alphaproteobacteria	Kiloniellales	Kiloniellaceae	Family: Kiloniellaceae	Family: Kiloniellaceae
690c027a7b6db34011ea5a02242cbf52	0	VcPf1N	Unhealthy	Grotta_Vico	VC	White_Cave_Dweller	Cave	Ambient	P.ficiformis	No	Yes	PetrosiaVC	PF5	Bacteria	Proteobacteria	Gammaproteobacteria	Nitrosococcales	Nitrosococcaceae	AqS1	Genus: AqS1
6adaae0dfe84c68d8503678d23a901d4	0	VcPf1N	Unhealthy	Grotta_Vico	VC	White_Cave_Dweller	Cave	Ambient	P.ficiformis	No	Yes	PetrosiaVC	PF5	Bacteria	Proteobacteria	Gammaproteobacteria	Pseudomonadales	KI89A_clade	KI89A_clade	Genus: KI89A_clade
6b42263b9b8bd58e85dadcfa39aadc3a	0	VcPf1N	Unhealthy	Grotta_Vico	VC	White_Cave_Dweller	Cave	Ambient	P.ficiformis	No	Yes	PetrosiaVC	PF5	Bacteria	Proteobacteria	Gammaproteobacteria	Pseudomonadales	KI89A_clade	KI89A_clade	Genus: KI89A_clade
6c809937e62b7b9e3d9680dde8514458	0	VcPf1N	Unhealthy	Grotta_Vico	VC	White_Cave_Dweller	Cave	Ambient	P.ficiformis	No	Yes	PetrosiaVC	PF5	Bacteria	Proteobacteria	Gammaproteobacteria	pItb-vmat-80	pItb-vmat-80	pItb-vmat-80	Genus: pItb-vmat-80
6cc350b465d853b01516c6dc3c9cec60	0	VcPf1N	Unhealthy	Grotta_Vico	VC	White_Cave_Dweller	Cave	Ambient	P.ficiformis	No	Yes	PetrosiaVC	PF5	Bacteria	Proteobacteria	Alphaproteobacteria	Sphingomonadales	Sphingomonadaceae	Family: Sphingomonadaceae	Family: Sphingomonadaceae
6ce359edd2145bb37b0fe5100c5682b3	0	VcPf1N	Unhealthy	Grotta_Vico	VC	White_Cave_Dweller	Cave	Ambient	P.ficiformis	No	Yes	PetrosiaVC	PF5	Bacteria	Proteobacteria	Gammaproteobacteria	EPR3968-O8a-Bc78	EPR3968-O8a-Bc78	EPR3968-O8a-Bc78	Genus: EPR3968-O8a-Bc78
6f190ae19e29de9d3ac026f29743e42d	0	VcPf1N	Unhealthy	Grotta_Vico	VC	White_Cave_Dweller	Cave	Ambient	P.ficiformis	No	Yes	PetrosiaVC	PF5	Bacteria	Proteobacteria	Alphaproteobacteria	Rhodobacterales	Rhodobacteraceae	Albidovulum	Genus: Albidovulum
6f9801a92fc385075df252bcf01891f3	0	VcPf1N	Unhealthy	Grotta_Vico	VC	White_Cave_Dweller	Cave	Ambient	P.ficiformis	No	Yes	PetrosiaVC	PF5	Bacteria	Proteobacteria	Gammaproteobacteria	Pseudomonadales	KI89A_clade	KI89A_clade	Genus: KI89A_clade
72c0d24918f3d9cb20e942f9464542c3	0	VcPf1N	Unhealthy	Grotta_Vico	VC	White_Cave_Dweller	Cave	Ambient	P.ficiformis	No	Yes	PetrosiaVC	PF5	Bacteria	Proteobacteria	Gammaproteobacteria	Pseudomonadales	Nitrincolaceae	Neptuniibacter	Genus: Neptuniibacter
734dd2fb576b29a7e841f85408827e76	0	VcPf1N	Unhealthy	Grotta_Vico	VC	White_Cave_Dweller	Cave	Ambient	P.ficiformis	No	Yes	PetrosiaVC	PF5	Bacteria	Proteobacteria	Alphaproteobacteria	Rhodospirillales	Order: Rhodospirillales	Order: Rhodospirillales	Order: Rhodospirillales
741f9bd1234af38c0f925ead914aeeec	0	VcPf1N	Unhealthy	Grotta_Vico	VC	White_Cave_Dweller	Cave	Ambient	P.ficiformis	No	Yes	PetrosiaVC	PF5	Bacteria	Proteobacteria	Gammaproteobacteria	Class: Gammaproteobacteria	Class: Gammaproteobacteria	Class: Gammaproteobacteria	Class: Gammaproteobacteria
78af5c1daa72e7d9ea86895f88d98078	0	VcPf1N	Unhealthy	Grotta_Vico	VC	White_Cave_Dweller	Cave	Ambient	P.ficiformis	No	Yes	PetrosiaVC	PF5	Bacteria	Proteobacteria	Gammaproteobacteria	Pseudomonadales	KI89A_clade	KI89A_clade	Genus: KI89A_clade
7b9dc98bde245724f7668795921d030e	0	VcPf1N	Unhealthy	Grotta_Vico	VC	White_Cave_Dweller	Cave	Ambient	P.ficiformis	No	Yes	PetrosiaVC	PF5	Bacteria	Proteobacteria	Alphaproteobacteria	Defluviicoccales	Order: Defluviicoccales	Order: Defluviicoccales	Order: Defluviicoccales
7d2dee78b6b18d6409fd21a7e3437d2c	0	VcPf1N	Unhealthy	Grotta_Vico	VC	White_Cave_Dweller	Cave	Ambient	P.ficiformis	No	Yes	PetrosiaVC	PF5	Bacteria	Proteobacteria	Gammaproteobacteria	Arenicellales	Arenicellaceae	Family: Arenicellaceae	Family: Arenicellaceae
7e61aafbe23cb60e938faf9bf8544b30	0	VcPf1N	Unhealthy	Grotta_Vico	VC	White_Cave_Dweller	Cave	Ambient	P.ficiformis	No	Yes	PetrosiaVC	PF5	Bacteria	Proteobacteria	Gammaproteobacteria	JTB23	JTB23	JTB23	Genus: JTB23
7eb082e9600435c1357cc61d4904d0fd	0	VcPf1N	Unhealthy	Grotta_Vico	VC	White_Cave_Dweller	Cave	Ambient	P.ficiformis	No	Yes	PetrosiaVC	PF5	Bacteria	Proteobacteria	Gammaproteobacteria	Pseudomonadales	Cellvibrionaceae	Pseudoteredinibacter	Genus: Pseudoteredinibacter
806a1d61035a1f7486a3ab6cb476a4d1	0	VcPf1N	Unhealthy	Grotta_Vico	VC	White_Cave_Dweller	Cave	Ambient	P.ficiformis	No	Yes	PetrosiaVC	PF5	Bacteria	Proteobacteria	Alphaproteobacteria	Rhodobacterales	Rhodobacteraceae	Cognatishimia	Genus: Cognatishimia
81ad33ff2dc3c7b41a7e6fcf2e3111f0	0	VcPf1N	Unhealthy	Grotta_Vico	VC	White_Cave_Dweller	Cave	Ambient	P.ficiformis	No	Yes	PetrosiaVC	PF5	Bacteria	Proteobacteria	Gammaproteobacteria	Class: Gammaproteobacteria	Class: Gammaproteobacteria	Class: Gammaproteobacteria	Class: Gammaproteobacteria
81d6c542132946c723303132faa5b865	0	VcPf1N	Unhealthy	Grotta_Vico	VC	White_Cave_Dweller	Cave	Ambient	P.ficiformis	No	Yes	PetrosiaVC	PF5	Bacteria	Proteobacteria	Gammaproteobacteria	Pseudomonadales	KI89A_clade	KI89A_clade	Genus: KI89A_clade
868f554b88f62e23a78d32ed31c6f0b6	0	VcPf1N	Unhealthy	Grotta_Vico	VC	White_Cave_Dweller	Cave	Ambient	P.ficiformis	No	Yes	PetrosiaVC	PF5	Bacteria	Proteobacteria	Alphaproteobacteria	Puniceispirillales	Puniceispirillales_Incertae_Sedis	Constrictibacter	Genus: Constrictibacter
86acd22da3467ac425d4d559457ca12b	0	VcPf1N	Unhealthy	Grotta_Vico	VC	White_Cave_Dweller	Cave	Ambient	P.ficiformis	No	Yes	PetrosiaVC	PF5	Bacteria	Proteobacteria	Gammaproteobacteria	Ectothiorhodospirales	Ectothiorhodospiraceae	Family: Ectothiorhodospiraceae	Family: Ectothiorhodospiraceae
8995f47f6b5c70dad28854d6066cfd50	0	VcPf1N	Unhealthy	Grotta_Vico	VC	White_Cave_Dweller	Cave	Ambient	P.ficiformis	No	Yes	PetrosiaVC	PF5	Bacteria	Proteobacteria	Gammaproteobacteria	Pseudomonadales	KI89A_clade	KI89A_clade	Genus: KI89A_clade
89fc3e78f5e831e76a9066f880ba3c68	0	VcPf1N	Unhealthy	Grotta_Vico	VC	White_Cave_Dweller	Cave	Ambient	P.ficiformis	No	Yes	PetrosiaVC	PF5	Bacteria	Proteobacteria	Alphaproteobacteria	Rickettsiales	SM2D12	SM2D12	Genus: SM2D12
8a23c5998e6302af12faa67bc74e7ea5	0	VcPf1N	Unhealthy	Grotta_Vico	VC	White_Cave_Dweller	Cave	Ambient	P.ficiformis	No	Yes	PetrosiaVC	PF5	Bacteria	Proteobacteria	Gammaproteobacteria	Ectothiorhodospirales	Ectothiorhodospiraceae	Family: Ectothiorhodospiraceae	Family: Ectothiorhodospiraceae
8aa10e72b10a1de04944ddfc82bfabd4	0	VcPf1N	Unhealthy	Grotta_Vico	VC	White_Cave_Dweller	Cave	Ambient	P.ficiformis	No	Yes	PetrosiaVC	PF5	Bacteria	Proteobacteria	Alphaproteobacteria	Micavibrionales	Order: Micavibrionales	Order: Micavibrionales	Order: Micavibrionales
8d5e4db9c2d95b8dcf252f42e17d722d	0	VcPf1N	Unhealthy	Grotta_Vico	VC	White_Cave_Dweller	Cave	Ambient	P.ficiformis	No	Yes	PetrosiaVC	PF5	Bacteria	Proteobacteria	Gammaproteobacteria	Class: Gammaproteobacteria	Class: Gammaproteobacteria	Class: Gammaproteobacteria	Class: Gammaproteobacteria
91534df4a66f94b40d61fe51c30f28e8	0	VcPf1N	Unhealthy	Grotta_Vico	VC	White_Cave_Dweller	Cave	Ambient	P.ficiformis	No	Yes	PetrosiaVC	PF5	Bacteria	Proteobacteria	Gammaproteobacteria	Pseudomonadales	KI89A_clade	KI89A_clade	Genus: KI89A_clade
9626dd1173ac2c4b7e3ab12132a64741	0	VcPf1N	Unhealthy	Grotta_Vico	VC	White_Cave_Dweller	Cave	Ambient	P.ficiformis	No	Yes	PetrosiaVC	PF5	Bacteria	Proteobacteria	Alphaproteobacteria	Rhodobacterales	Rhodobacteraceae	Family: Rhodobacteraceae	Family: Rhodobacteraceae
97fb8ec1addf7f02c1b8ff7f49627563	0	VcPf1N	Unhealthy	Grotta_Vico	VC	White_Cave_Dweller	Cave	Ambient	P.ficiformis	No	Yes	PetrosiaVC	PF5	Bacteria	Proteobacteria	Gammaproteobacteria	HOC36	HOC36	HOC36	Genus: HOC36
98fcd625b8fdaf9b647c75914e692861	0	VcPf1N	Unhealthy	Grotta_Vico	VC	White_Cave_Dweller	Cave	Ambient	P.ficiformis	No	Yes	PetrosiaVC	PF5	Bacteria	Proteobacteria	Gammaproteobacteria	Nitrosococcales	Nitrosococcaceae	AqS1	Genus: AqS1
99414da0f7df3819b621dcc16b57dc22	0	VcPf1N	Unhealthy	Grotta_Vico	VC	White_Cave_Dweller	Cave	Ambient	P.ficiformis	No	Yes	PetrosiaVC	PF5	Bacteria	Proteobacteria	Alphaproteobacteria	Rhizobiales	Rhizobiaceae	Family: Rhizobiaceae	Family: Rhizobiaceae
9adf92c5c915dcce79d9b74016d8e00e	0	VcPf1N	Unhealthy	Grotta_Vico	VC	White_Cave_Dweller	Cave	Ambient	P.ficiformis	No	Yes	PetrosiaVC	PF5	Bacteria	Proteobacteria	Gammaproteobacteria	Thiotrichales	Thiotrichaceae	Family: Thiotrichaceae	Family: Thiotrichaceae
9c74fa7f8e88b7830846db8e7066410b	0	VcPf1N	Unhealthy	Grotta_Vico	VC	White_Cave_Dweller	Cave	Ambient	P.ficiformis	No	Yes	PetrosiaVC	PF5	Bacteria	Proteobacteria	Alphaproteobacteria	Rhodobacterales	Rhodobacteraceae	Family: Rhodobacteraceae	Family: Rhodobacteraceae
9f328be55d2c0f665fae00f068839588	0	VcPf1N	Unhealthy	Grotta_Vico	VC	White_Cave_Dweller	Cave	Ambient	P.ficiformis	No	Yes	PetrosiaVC	PF5	Bacteria	Proteobacteria	Alphaproteobacteria	Rickettsiales	SM2D12	SM2D12	Genus: SM2D12
9fcecb0b87e7c075962b8ceebc8c8134	0	VcPf1N	Unhealthy	Grotta_Vico	VC	White_Cave_Dweller	Cave	Ambient	P.ficiformis	No	Yes	PetrosiaVC	PF5	Bacteria	Proteobacteria	Alphaproteobacteria	Defluviicoccales	Order: Defluviicoccales	Order: Defluviicoccales	Order: Defluviicoccales
a076fdf9ac148a1b2d5fea6d1ae16fab	0	VcPf1N	Unhealthy	Grotta_Vico	VC	White_Cave_Dweller	Cave	Ambient	P.ficiformis	No	Yes	PetrosiaVC	PF5	Bacteria	Proteobacteria	Alphaproteobacteria	Rhodobacterales	Rhodobacteraceae	Family: Rhodobacteraceae	Family: Rhodobacteraceae
a422ee4f50b78d1a02f8d69773e6bac5	0	VcPf1N	Unhealthy	Grotta_Vico	VC	White_Cave_Dweller	Cave	Ambient	P.ficiformis	No	Yes	PetrosiaVC	PF5	Bacteria	Proteobacteria	Alphaproteobacteria	Rhodobacterales	Rhodobacteraceae	Family: Rhodobacteraceae	Family: Rhodobacteraceae
a5f252c77ba9ec05e3210792c7ad8a69	0	VcPf1N	Unhealthy	Grotta_Vico	VC	White_Cave_Dweller	Cave	Ambient	P.ficiformis	No	Yes	PetrosiaVC	PF5	Bacteria	Proteobacteria	Gammaproteobacteria	EPR3968-O8a-Bc78	EPR3968-O8a-Bc78	EPR3968-O8a-Bc78	Genus: EPR3968-O8a-Bc78
a68ac2a8c6b7207a92e17c60b9b0a7d6	0	VcPf1N	Unhealthy	Grotta_Vico	VC	White_Cave_Dweller	Cave	Ambient	P.ficiformis	No	Yes	PetrosiaVC	PF5	Bacteria	Proteobacteria	Alphaproteobacteria	Rhodobacterales	Rhodobacteraceae	Family: Rhodobacteraceae	Family: Rhodobacteraceae
a68bb7f4d0e5f44353baf810275bcb61	0	VcPf1N	Unhealthy	Grotta_Vico	VC	White_Cave_Dweller	Cave	Ambient	P.ficiformis	No	Yes	PetrosiaVC	PF5	Bacteria	Proteobacteria	Alphaproteobacteria	Rhodobacterales	Rhodobacteraceae	Family: Rhodobacteraceae	Family: Rhodobacteraceae
a70458ef51bee113c903db03b8cd2651	0	VcPf1N	Unhealthy	Grotta_Vico	VC	White_Cave_Dweller	Cave	Ambient	P.ficiformis	No	Yes	PetrosiaVC	PF5	Bacteria	Proteobacteria	Alphaproteobacteria	AT-s3-44	AT-s3-44	AT-s3-44	Genus: AT-s3-44
aa983d8d5b7f12f85a69afdbb58f8552	0	VcPf1N	Unhealthy	Grotta_Vico	VC	White_Cave_Dweller	Cave	Ambient	P.ficiformis	No	Yes	PetrosiaVC	PF5	Bacteria	Proteobacteria	Gammaproteobacteria	Pseudomonadales	KI89A_clade	KI89A_clade	Genus: KI89A_clade
aaf3d523210c858251391ecdf860dca6	0	VcPf1N	Unhealthy	Grotta_Vico	VC	White_Cave_Dweller	Cave	Ambient	P.ficiformis	No	Yes	PetrosiaVC	PF5	Bacteria	Proteobacteria	Gammaproteobacteria	Pseudomonadales	Cellvibrionaceae	Family: Cellvibrionaceae	Family: Cellvibrionaceae
ab1e0ee1d3fbcbc3e5a53bf3eaeef60f	0	VcPf1N	Unhealthy	Grotta_Vico	VC	White_Cave_Dweller	Cave	Ambient	P.ficiformis	No	Yes	PetrosiaVC	PF5	Bacteria	Proteobacteria	Alphaproteobacteria	Rhodobacterales	Rhodobacteraceae	Tropicibacter	Genus: Tropicibacter
ab4105e31b7fd5ddd7d089b4abc4262b	0	VcPf1N	Unhealthy	Grotta_Vico	VC	White_Cave_Dweller	Cave	Ambient	P.ficiformis	No	Yes	PetrosiaVC	PF5	Bacteria	Proteobacteria	Alphaproteobacteria	Rhodobacterales	Rhodobacteraceae	Family: Rhodobacteraceae	Family: Rhodobacteraceae
ab6151de482049167acb71a2969446f5	0	VcPf1N	Unhealthy	Grotta_Vico	VC	White_Cave_Dweller	Cave	Ambient	P.ficiformis	No	Yes	PetrosiaVC	PF5	Bacteria	Proteobacteria	Alphaproteobacteria	Defluviicoccales	Order: Defluviicoccales	Order: Defluviicoccales	Order: Defluviicoccales
aef0678e5a5d7b0adeaade4a52013f7d	0	VcPf1N	Unhealthy	Grotta_Vico	VC	White_Cave_Dweller	Cave	Ambient	P.ficiformis	No	Yes	PetrosiaVC	PF5	Bacteria	Proteobacteria	Gammaproteobacteria	Pseudomonadales	Porticoccaceae	Porticoccus	Genus: Porticoccus
af06527ef871bd454b13f89217c46b55	0	VcPf1N	Unhealthy	Grotta_Vico	VC	White_Cave_Dweller	Cave	Ambient	P.ficiformis	No	Yes	PetrosiaVC	PF5	Bacteria	Proteobacteria	Gammaproteobacteria	EPR3968-O8a-Bc78	EPR3968-O8a-Bc78	EPR3968-O8a-Bc78	Genus: EPR3968-O8a-Bc78
af10a20a19fb941c5021ee854d0b68e3	0	VcPf1N	Unhealthy	Grotta_Vico	VC	White_Cave_Dweller	Cave	Ambient	P.ficiformis	No	Yes	PetrosiaVC	PF5	Bacteria	Proteobacteria	Gammaproteobacteria	JTB23	JTB23	JTB23	Genus: JTB23
b16212e32f5d902ee82f824060d990ef	0	VcPf1N	Unhealthy	Grotta_Vico	VC	White_Cave_Dweller	Cave	Ambient	P.ficiformis	No	Yes	PetrosiaVC	PF5	Bacteria	Proteobacteria	Alphaproteobacteria	Micavibrionales	Order: Micavibrionales	Order: Micavibrionales	Order: Micavibrionales
b17c758189572a7ad10d1f8068c33d9a	0	VcPf1N	Unhealthy	Grotta_Vico	VC	White_Cave_Dweller	Cave	Ambient	P.ficiformis	No	Yes	PetrosiaVC	PF5	Bacteria	Proteobacteria	Alphaproteobacteria	Caulobacterales	Hyphomonadaceae	Hellea	Genus: Hellea
b24df5f3f20eed05b3553a892949b808	0	VcPf1N	Unhealthy	Grotta_Vico	VC	White_Cave_Dweller	Cave	Ambient	P.ficiformis	No	Yes	PetrosiaVC	PF5	Bacteria	Proteobacteria	Gammaproteobacteria	UBA10353_group	UBA10353_group	UBA10353_group	Genus: UBA10353_group
b263de74eb4998585c38a586666477c3	0	VcPf1N	Unhealthy	Grotta_Vico	VC	White_Cave_Dweller	Cave	Ambient	P.ficiformis	No	Yes	PetrosiaVC	PF5	Bacteria	Proteobacteria	Gammaproteobacteria	Class: Gammaproteobacteria	Class: Gammaproteobacteria	Class: Gammaproteobacteria	Class: Gammaproteobacteria
b2824a942842e67193794ae6de79eeaf	0	VcPf1N	Unhealthy	Grotta_Vico	VC	White_Cave_Dweller	Cave	Ambient	P.ficiformis	No	Yes	PetrosiaVC	PF5	Bacteria	Proteobacteria	Alphaproteobacteria	Rhodobacterales	Rhodobacteraceae	Family: Rhodobacteraceae	Family: Rhodobacteraceae
b297d57d517f74761a8c5916108299bb	0	VcPf1N	Unhealthy	Grotta_Vico	VC	White_Cave_Dweller	Cave	Ambient	P.ficiformis	No	Yes	PetrosiaVC	PF5	Bacteria	Proteobacteria	Alphaproteobacteria	Kordiimonadales	Order: Kordiimonadales	Order: Kordiimonadales	Order: Kordiimonadales
b335c839d0eeb10db2b0c527a8015a4d	0	VcPf1N	Unhealthy	Grotta_Vico	VC	White_Cave_Dweller	Cave	Ambient	P.ficiformis	No	Yes	PetrosiaVC	PF5	Bacteria	Proteobacteria	Gammaproteobacteria	pItb-vmat-80	pItb-vmat-80	pItb-vmat-80	Genus: pItb-vmat-80
b408df251f543142209f77fafcaefda0	0	VcPf1N	Unhealthy	Grotta_Vico	VC	White_Cave_Dweller	Cave	Ambient	P.ficiformis	No	Yes	PetrosiaVC	PF5	Bacteria	Proteobacteria	Gammaproteobacteria	Gammaproteobacteria_Incertae_Sedis	Order: Gammaproteobacteria_Incertae_Sedis	Order: Gammaproteobacteria_Incertae_Sedis	Order: Gammaproteobacteria_Incertae_Sedis
b43a4ddbb78176c9d75dea45470902e4	0	VcPf1N	Unhealthy	Grotta_Vico	VC	White_Cave_Dweller	Cave	Ambient	P.ficiformis	No	Yes	PetrosiaVC	PF5	Bacteria	Proteobacteria	Gammaproteobacteria	Chromatiales	Sedimenticolaceae	Family: Sedimenticolaceae	Family: Sedimenticolaceae
ba390dcbcaeb2e45a07ba529679c2eb2	0	VcPf1N	Unhealthy	Grotta_Vico	VC	White_Cave_Dweller	Cave	Ambient	P.ficiformis	No	Yes	PetrosiaVC	PF5	Bacteria	Proteobacteria	Alphaproteobacteria	Caulobacterales	Hyphomonadaceae	Hirschia	Genus: Hirschia
bc83829b014ac67af983e6922060089b	0	VcPf1N	Unhealthy	Grotta_Vico	VC	White_Cave_Dweller	Cave	Ambient	P.ficiformis	No	Yes	PetrosiaVC	PF5	Bacteria	Proteobacteria	Gammaproteobacteria	Pseudomonadales	KI89A_clade	KI89A_clade	Genus: KI89A_clade
bce6c065755b79da7ff175e208631fd1	0	VcPf1N	Unhealthy	Grotta_Vico	VC	White_Cave_Dweller	Cave	Ambient	P.ficiformis	No	Yes	PetrosiaVC	PF5	Bacteria	Proteobacteria	Alphaproteobacteria	Rhodobacterales	Rhodobacteraceae	Actibacterium	Genus: Actibacterium
bda9f91d4f22f7c7fd9f4d5184d4106f	0	VcPf1N	Unhealthy	Grotta_Vico	VC	White_Cave_Dweller	Cave	Ambient	P.ficiformis	No	Yes	PetrosiaVC	PF5	Bacteria	Proteobacteria	Gammaproteobacteria	Enterobacterales	Alteromonadaceae	Aestuariibacter	Genus: Aestuariibacter
c1290e5763af3356e4f37ae4e7824f81	0	VcPf1N	Unhealthy	Grotta_Vico	VC	White_Cave_Dweller	Cave	Ambient	P.ficiformis	No	Yes	PetrosiaVC	PF5	Bacteria	Proteobacteria	Alphaproteobacteria	Defluviicoccales	Order: Defluviicoccales	Order: Defluviicoccales	Order: Defluviicoccales
c6f286bf2838fa087f9748a6cac65857	0	VcPf1N	Unhealthy	Grotta_Vico	VC	White_Cave_Dweller	Cave	Ambient	P.ficiformis	No	Yes	PetrosiaVC	PF5	Bacteria	Proteobacteria	Alphaproteobacteria	Rhodospirillales	Magnetospiraceae	Family: Magnetospiraceae	Family: Magnetospiraceae
cb8f25f02ceda1fa23713f7b41bcd6a1	0	VcPf1N	Unhealthy	Grotta_Vico	VC	White_Cave_Dweller	Cave	Ambient	P.ficiformis	No	Yes	PetrosiaVC	PF5	Bacteria	Proteobacteria	Gammaproteobacteria	Burkholderiales	Methylophilaceae	Methylotenera	Genus: Methylotenera
cdc05ef9ec2824e5afa8e4c094d5db88	0	VcPf1N	Unhealthy	Grotta_Vico	VC	White_Cave_Dweller	Cave	Ambient	P.ficiformis	No	Yes	PetrosiaVC	PF5	Bacteria	Proteobacteria	Gammaproteobacteria	Class: Gammaproteobacteria	Class: Gammaproteobacteria	Class: Gammaproteobacteria	Class: Gammaproteobacteria
d126a17348e9dc43fc29c52bd360f507	0	VcPf1N	Unhealthy	Grotta_Vico	VC	White_Cave_Dweller	Cave	Ambient	P.ficiformis	No	Yes	PetrosiaVC	PF5	Bacteria	Proteobacteria	Alphaproteobacteria	Rickettsiales	SM2D12	SM2D12	Genus: SM2D12
d2a1e2f28dbe35d6740c59c46379cdb2	0	VcPf1N	Unhealthy	Grotta_Vico	VC	White_Cave_Dweller	Cave	Ambient	P.ficiformis	No	Yes	PetrosiaVC	PF5	Bacteria	Proteobacteria	Alphaproteobacteria	Defluviicoccales	Order: Defluviicoccales	Order: Defluviicoccales	Order: Defluviicoccales
d67a9ded3020dd81ec11f70988b93f56	0	VcPf1N	Unhealthy	Grotta_Vico	VC	White_Cave_Dweller	Cave	Ambient	P.ficiformis	No	Yes	PetrosiaVC	PF5	Bacteria	Proteobacteria	Gammaproteobacteria	Pseudomonadales	Halieaceae	Halioglobus	Genus: Halioglobus
d6ea3d109c2b31921a6575c35ef67be3	0	VcPf1N	Unhealthy	Grotta_Vico	VC	White_Cave_Dweller	Cave	Ambient	P.ficiformis	No	Yes	PetrosiaVC	PF5	Bacteria	Proteobacteria	Gammaproteobacteria	Gammaproteobacteria_Incertae_Sedis	Order: Gammaproteobacteria_Incertae_Sedis	Order: Gammaproteobacteria_Incertae_Sedis	Order: Gammaproteobacteria_Incertae_Sedis
d737fcb1d338aadb5780a96821ac30b5	0	VcPf1N	Unhealthy	Grotta_Vico	VC	White_Cave_Dweller	Cave	Ambient	P.ficiformis	No	Yes	PetrosiaVC	PF5	Bacteria	Proteobacteria	Alphaproteobacteria	Defluviicoccales	Order: Defluviicoccales	Order: Defluviicoccales	Order: Defluviicoccales
d9fba8f27971c65a9b820cf7ffa0c1af	0	VcPf1N	Unhealthy	Grotta_Vico	VC	White_Cave_Dweller	Cave	Ambient	P.ficiformis	No	Yes	PetrosiaVC	PF5	Bacteria	Proteobacteria	Gammaproteobacteria	Pseudomonadales	KI89A_clade	KI89A_clade	Genus: KI89A_clade
db994a1c9fcd39ee3a5f22a7d511d740	0	VcPf1N	Unhealthy	Grotta_Vico	VC	White_Cave_Dweller	Cave	Ambient	P.ficiformis	No	Yes	PetrosiaVC	PF5	Bacteria	Proteobacteria	Alphaproteobacteria	Class: Alphaproteobacteria	Class: Alphaproteobacteria	Class: Alphaproteobacteria	Class: Alphaproteobacteria
dd67316180ee058d8dc3674941ecd528	0	VcPf1N	Unhealthy	Grotta_Vico	VC	White_Cave_Dweller	Cave	Ambient	P.ficiformis	No	Yes	PetrosiaVC	PF5	Bacteria	Proteobacteria	Gammaproteobacteria	Pseudomonadales	Nitrincolaceae	Marinobacterium	Neptuniibacter_sp.
df78cb11fcad53df05ce8d3e9bd33eff	0	VcPf1N	Unhealthy	Grotta_Vico	VC	White_Cave_Dweller	Cave	Ambient	P.ficiformis	No	Yes	PetrosiaVC	PF5	Bacteria	Proteobacteria	Gammaproteobacteria	Class: Gammaproteobacteria	Class: Gammaproteobacteria	Class: Gammaproteobacteria	Class: Gammaproteobacteria
e066560ab9d21cee5979302ba741aeba	0	VcPf1N	Unhealthy	Grotta_Vico	VC	White_Cave_Dweller	Cave	Ambient	P.ficiformis	No	Yes	PetrosiaVC	PF5	Bacteria	Proteobacteria	Alphaproteobacteria	Caulobacterales	Hyphomonadaceae	Maricaulis	Genus: Maricaulis
e0d6711ac6a2c034c52f830b73411627	0	VcPf1N	Unhealthy	Grotta_Vico	VC	White_Cave_Dweller	Cave	Ambient	P.ficiformis	No	Yes	PetrosiaVC	PF5	Bacteria	Proteobacteria	Gammaproteobacteria	Arenicellales	Arenicellaceae	HTCC5015	Genus: HTCC5015
e19d6ab285a661a20393051eb6fe885d	0	VcPf1N	Unhealthy	Grotta_Vico	VC	White_Cave_Dweller	Cave	Ambient	P.ficiformis	No	Yes	PetrosiaVC	PF5	Bacteria	Proteobacteria	Gammaproteobacteria	Pseudomonadales	OM182_clade	OM182_clade	Genus: OM182_clade
e36dc2eb4a740c003e519e414c9ab09d	0	VcPf1N	Unhealthy	Grotta_Vico	VC	White_Cave_Dweller	Cave	Ambient	P.ficiformis	No	Yes	PetrosiaVC	PF5	Bacteria	Proteobacteria	Alphaproteobacteria	Defluviicoccales	Order: Defluviicoccales	Order: Defluviicoccales	Order: Defluviicoccales
e4fc3333123c849329d7675c66df815a	0	VcPf1N	Unhealthy	Grotta_Vico	VC	White_Cave_Dweller	Cave	Ambient	P.ficiformis	No	Yes	PetrosiaVC	PF5	Bacteria	Proteobacteria	Alphaproteobacteria	Defluviicoccales	Order: Defluviicoccales	Order: Defluviicoccales	Order: Defluviicoccales
e805657d8518a62ac1a4430c7bac2c13	0	VcPf1N	Unhealthy	Grotta_Vico	VC	White_Cave_Dweller	Cave	Ambient	P.ficiformis	No	Yes	PetrosiaVC	PF5	Bacteria	Proteobacteria	Alphaproteobacteria	Rhodobacterales	Rhodobacteraceae	Family: Rhodobacteraceae	Family: Rhodobacteraceae
e8300c208ad1086abd0aa75b6f86ab3a	0	VcPf1N	Unhealthy	Grotta_Vico	VC	White_Cave_Dweller	Cave	Ambient	P.ficiformis	No	Yes	PetrosiaVC	PF5	Bacteria	Proteobacteria	Alphaproteobacteria	Micavibrionales	Micavibrionaceae	Family: Micavibrionaceae	Family: Micavibrionaceae
e9137e128559135e1a3cf6b20f59059b	0	VcPf1N	Unhealthy	Grotta_Vico	VC	White_Cave_Dweller	Cave	Ambient	P.ficiformis	No	Yes	PetrosiaVC	PF5	Bacteria	Proteobacteria	Gammaproteobacteria	Pseudomonadales	KI89A_clade	KI89A_clade	Genus: KI89A_clade
e9650dc35044b26202676edafe2299c6	0	VcPf1N	Unhealthy	Grotta_Vico	VC	White_Cave_Dweller	Cave	Ambient	P.ficiformis	No	Yes	PetrosiaVC	PF5	Bacteria	Proteobacteria	Alphaproteobacteria	Rhodobacterales	Rhodobacteraceae	Family: Rhodobacteraceae	Family: Rhodobacteraceae
ebdb3b4e1332329994ff2e3892ee897a	0	VcPf1N	Unhealthy	Grotta_Vico	VC	White_Cave_Dweller	Cave	Ambient	P.ficiformis	No	Yes	PetrosiaVC	PF5	Bacteria	Proteobacteria	Gammaproteobacteria	Pseudomonadales	KI89A_clade	KI89A_clade	Genus: KI89A_clade
ecce724eb071143eef6b4f90f1780b31	0	VcPf1N	Unhealthy	Grotta_Vico	VC	White_Cave_Dweller	Cave	Ambient	P.ficiformis	No	Yes	PetrosiaVC	PF5	Bacteria	Proteobacteria	Gammaproteobacteria	Nitrosococcales	Methylophagaceae	Methylotrophic_Group_3	Genus: Methylotrophic_Group_3
ecda84de552f62a432d413ba2c90e942	0	VcPf1N	Unhealthy	Grotta_Vico	VC	White_Cave_Dweller	Cave	Ambient	P.ficiformis	No	Yes	PetrosiaVC	PF5	Bacteria	Proteobacteria	Gammaproteobacteria	Steroidobacterales	Woeseiaceae	JTB255_benthic	Genus: JTB255_benthic
ed3bcafc46508ab8aef819a0377bff36	0	VcPf1N	Unhealthy	Grotta_Vico	VC	White_Cave_Dweller	Cave	Ambient	P.ficiformis	No	Yes	PetrosiaVC	PF5	Bacteria	Proteobacteria	Gammaproteobacteria	Class: Gammaproteobacteria	Class: Gammaproteobacteria	Class: Gammaproteobacteria	Class: Gammaproteobacteria
edc03b77d75fa8d3bb9d1293014c7bd6	0	VcPf1N	Unhealthy	Grotta_Vico	VC	White_Cave_Dweller	Cave	Ambient	P.ficiformis	No	Yes	PetrosiaVC	PF5	Bacteria	Proteobacteria	Gammaproteobacteria	Pseudomonadales	KI89A_clade	KI89A_clade	Genus: KI89A_clade
efe90242338cd5d74ffbd877b4129b04	0	VcPf1N	Unhealthy	Grotta_Vico	VC	White_Cave_Dweller	Cave	Ambient	P.ficiformis	No	Yes	PetrosiaVC	PF5	Bacteria	Proteobacteria	Gammaproteobacteria	Steroidobacterales	Woeseiaceae	JTB255_benthic	Genus: JTB255_benthic
f079aa511d208be1a8d61154586388a1	0	VcPf1N	Unhealthy	Grotta_Vico	VC	White_Cave_Dweller	Cave	Ambient	P.ficiformis	No	Yes	PetrosiaVC	PF5	Bacteria	Proteobacteria	Alphaproteobacteria	Rhodobacterales	Rhodobacteraceae	Family: Rhodobacteraceae	Family: Rhodobacteraceae
f2211de6ef862219e827bb644f116613	0	VcPf1N	Unhealthy	Grotta_Vico	VC	White_Cave_Dweller	Cave	Ambient	P.ficiformis	No	Yes	PetrosiaVC	PF5	Bacteria	Proteobacteria	Alphaproteobacteria	Rhizobiales	Hyphomicrobiaceae	Filomicrobium	Genus: Filomicrobium
f5b28b630059b6f704b3926f9ac71356	0	VcPf1N	Unhealthy	Grotta_Vico	VC	White_Cave_Dweller	Cave	Ambient	P.ficiformis	No	Yes	PetrosiaVC	PF5	Bacteria	Proteobacteria	Gammaproteobacteria	Steroidobacterales	Woeseiaceae	JTB255_benthic	Genus: JTB255_benthic
f74bf88be3c3fc3aa089270adfe9964d	0	VcPf1N	Unhealthy	Grotta_Vico	VC	White_Cave_Dweller	Cave	Ambient	P.ficiformis	No	Yes	PetrosiaVC	PF5	Bacteria	Proteobacteria	Gammaproteobacteria	JTB23	JTB23	JTB23	Genus: JTB23
f7ec393d19ffb2b78fe2589757a41f6f	0	VcPf1N	Unhealthy	Grotta_Vico	VC	White_Cave_Dweller	Cave	Ambient	P.ficiformis	No	Yes	PetrosiaVC	PF5	Bacteria	Proteobacteria	Alphaproteobacteria	Kiloniellales	Kiloniellaceae	Family: Kiloniellaceae	Family: Kiloniellaceae
f852b4c6a6a43c2af025c8cd79ce4b2c	0	VcPf1N	Unhealthy	Grotta_Vico	VC	White_Cave_Dweller	Cave	Ambient	P.ficiformis	No	Yes	PetrosiaVC	PF5	Bacteria	Proteobacteria	Alphaproteobacteria	Rhodospirillales	Terasakiellaceae	Family: Terasakiellaceae	Family: Terasakiellaceae
f9404661ca724985ec4de10ad921336f	0	VcPf1N	Unhealthy	Grotta_Vico	VC	White_Cave_Dweller	Cave	Ambient	P.ficiformis	No	Yes	PetrosiaVC	PF5	Bacteria	Proteobacteria	Gammaproteobacteria	EPR3968-O8a-Bc78	EPR3968-O8a-Bc78	EPR3968-O8a-Bc78	Genus: EPR3968-O8a-Bc78
fa1c7d9a1558a0bb0e01965bcdda30d3	0	VcPf1N	Unhealthy	Grotta_Vico	VC	White_Cave_Dweller	Cave	Ambient	P.ficiformis	No	Yes	PetrosiaVC	PF5	Bacteria	Proteobacteria	Alphaproteobacteria	Micavibrionales	Micavibrionaceae	Family: Micavibrionaceae	Family: Micavibrionaceae
fa4986d10302e1c1899025b9cbc92d45	0	VcPf1N	Unhealthy	Grotta_Vico	VC	White_Cave_Dweller	Cave	Ambient	P.ficiformis	No	Yes	PetrosiaVC	PF5	Bacteria	Proteobacteria	Gammaproteobacteria	Pseudomonadales	KI89A_clade	KI89A_clade	Genus: KI89A_clade
fc47f4d2b0b8f5ffee9813f10c178063	0	VcPf1N	Unhealthy	Grotta_Vico	VC	White_Cave_Dweller	Cave	Ambient	P.ficiformis	No	Yes	PetrosiaVC	PF5	Bacteria	Proteobacteria	Alphaproteobacteria	Puniceispirillales	Order: Puniceispirillales	Order: Puniceispirillales	Order: Puniceispirillales
fc85a2441c4bee7f8ba0d40dd90f3b47	0	VcPf1N	Unhealthy	Grotta_Vico	VC	White_Cave_Dweller	Cave	Ambient	P.ficiformis	No	Yes	PetrosiaVC	PF5	Bacteria	Proteobacteria	Alphaproteobacteria	Rhodobacterales	Rhodobacteraceae	Family: Rhodobacteraceae	Family: Rhodobacteraceae
fd42672e53719d9738a145cc21dd87bf	0	VcPf1N	Unhealthy	Grotta_Vico	VC	White_Cave_Dweller	Cave	Ambient	P.ficiformis	No	Yes	PetrosiaVC	PF5	Bacteria	Proteobacteria	Alphaproteobacteria	Kiloniellales	Kiloniellaceae	Family: Kiloniellaceae	Family: Kiloniellaceae
499717b70b863ad0d4232b45400535eb	0	VcPf1N	Unhealthy	Grotta_Vico	VC	White_Cave_Dweller	Cave	Ambient	P.ficiformis	No	Yes	PetrosiaVC	PF5	Bacteria	SAR324_clade(B)	SAR324_clade(B)	SAR324_clade(B)	SAR324_clade(B)	SAR324_clade(B)	Genus: SAR324_clade(B)
65304ff49c5e6c405ee45d68677fa4ee	0	VcPf1N	Unhealthy	Grotta_Vico	VC	White_Cave_Dweller	Cave	Ambient	P.ficiformis	No	Yes	PetrosiaVC	PF5	Bacteria	SAR324_clade(B)	SAR324_clade(B)	SAR324_clade(B)	SAR324_clade(B)	SAR324_clade(B)	Genus: SAR324_clade(B)
e99c68c5271c588d90fb418e01225186	0	VcPf1N	Unhealthy	Grotta_Vico	VC	White_Cave_Dweller	Cave	Ambient	P.ficiformis	No	Yes	PetrosiaVC	PF5	Bacteria	SAR324_clade(B)	SAR324_clade(B)	SAR324_clade(B)	SAR324_clade(B)	SAR324_clade(B)	Genus: SAR324_clade(B)
15d4bc045c6ef6b986efa2c62e4985e8	0	VcPf1N	Unhealthy	Grotta_Vico	VC	White_Cave_Dweller	Cave	Ambient	P.ficiformis	No	Yes	PetrosiaVC	PF5	Bacteria	Spirochaetota	Spirochaetia	Spirochaetales	Spirochaetaceae	Spirochaeta	Genus: Spirochaeta
7e320e07cc44414c89e35b80971f5043	0	VcPf1N	Unhealthy	Grotta_Vico	VC	White_Cave_Dweller	Cave	Ambient	P.ficiformis	No	Yes	PetrosiaVC	PF5	Bacteria	Spirochaetota	Spirochaetia	Spirochaetales	Spirochaetaceae	Spirochaeta	Genus: Spirochaeta
97490cd468876ae4b27adbc84138e1c1	0	VcPf1N	Unhealthy	Grotta_Vico	VC	White_Cave_Dweller	Cave	Ambient	P.ficiformis	No	Yes	PetrosiaVC	PF5	Bacteria	Spirochaetota	Spirochaetia	Spirochaetales	Spirochaetaceae	Spirochaeta	Genus: Spirochaeta
9e9c97541e8a0b7fc427813b55ea263b	0	VcPf1N	Unhealthy	Grotta_Vico	VC	White_Cave_Dweller	Cave	Ambient	P.ficiformis	No	Yes	PetrosiaVC	PF5	Bacteria	Spirochaetota	Spirochaetia	Spirochaetales	Spirochaetaceae	Sediminispirochaeta	Genus: Sediminispirochaeta
9ee6eca87e1c38e388d49d4dc8bf0dd6	0	VcPf1N	Unhealthy	Grotta_Vico	VC	White_Cave_Dweller	Cave	Ambient	P.ficiformis	No	Yes	PetrosiaVC	PF5	Bacteria	Spirochaetota	Spirochaetia	Spirochaetales	Spirochaetaceae	Spirochaeta	Genus: Spirochaeta
b7a6c4f8bcdb866fe4b4fdf80055face	0	VcPf1N	Unhealthy	Grotta_Vico	VC	White_Cave_Dweller	Cave	Ambient	P.ficiformis	No	Yes	PetrosiaVC	PF5	Bacteria	Spirochaetota	Spirochaetia	Spirochaetales	Spirochaetaceae	Spirochaeta_2	Oceanispirochaeta_sediminicola
e19822585a863310cfc8926774c0eac4	0	VcPf1N	Unhealthy	Grotta_Vico	VC	White_Cave_Dweller	Cave	Ambient	P.ficiformis	No	Yes	PetrosiaVC	PF5	Bacteria	Spirochaetota	Leptospirae	Leptospirales	Leptospiraceae	Family: Leptospiraceae	Family: Leptospiraceae
b062921cf07f7c5b9e53ba8486745047	0	VcPf1N	Unhealthy	Grotta_Vico	VC	White_Cave_Dweller	Cave	Ambient	P.ficiformis	No	Yes	PetrosiaVC	PF5	Bacteria	Sumerlaeota	Sumerlaeia	Sumerlaeales	Sumerlaeaceae	Sumerlaea	Genus: Sumerlaea
122b47318cbd39d6942aaaf7af0ec9ae	0	VcPf1N	Unhealthy	Grotta_Vico	VC	White_Cave_Dweller	Cave	Ambient	P.ficiformis	No	Yes	PetrosiaVC	PF5	Bacteria	Verrucomicrobiota	Verrucomicrobiae	Verrucomicrobiales	DEV007	DEV007	Genus: DEV007
475630406f837012c74e0232c77fc91a	0	VcPf1N	Unhealthy	Grotta_Vico	VC	White_Cave_Dweller	Cave	Ambient	P.ficiformis	No	Yes	PetrosiaVC	PF5	Bacteria	Verrucomicrobiota	Verrucomicrobiae	Verrucomicrobiales	DEV007	DEV007	Genus: DEV007
63c1e13003a0d33a445f2a79b4068a5f	0	VcPf1N	Unhealthy	Grotta_Vico	VC	White_Cave_Dweller	Cave	Ambient	P.ficiformis	No	Yes	PetrosiaVC	PF5	Bacteria	Verrucomicrobiota	Kiritimatiellae	WCHB1-41	WCHB1-41	WCHB1-41	Genus: WCHB1-41
727ca8996ada5615b5a0c895ed6f8f7a	0	VcPf1N	Unhealthy	Grotta_Vico	VC	White_Cave_Dweller	Cave	Ambient	P.ficiformis	No	Yes	PetrosiaVC	PF5	Bacteria	Verrucomicrobiota	Verrucomicrobiae	Verrucomicrobiales	DEV007	DEV007	Genus: DEV007
7937dd414bd202a644197dadc6c583a4	0	VcPf1N	Unhealthy	Grotta_Vico	VC	White_Cave_Dweller	Cave	Ambient	P.ficiformis	No	Yes	PetrosiaVC	PF5	Bacteria	Verrucomicrobiota	Lentisphaeria	P.palmC41	P.palmC41	P.palmC41	Genus: P.palmC41
793b186d3d98058c824b7d7fb46defbb	0	VcPf1N	Unhealthy	Grotta_Vico	VC	White_Cave_Dweller	Cave	Ambient	P.ficiformis	No	Yes	PetrosiaVC	PF5	Bacteria	Verrucomicrobiota	Verrucomicrobiae	Pedosphaerales	Pedosphaeraceae	SCGC_AAA164-E04	Genus: SCGC_AAA164-E04
7b830e79077687ba90222ed9cccfdab9	0	VcPf1N	Unhealthy	Grotta_Vico	VC	White_Cave_Dweller	Cave	Ambient	P.ficiformis	No	Yes	PetrosiaVC	PF5	Bacteria	Verrucomicrobiota	Verrucomicrobiae	Pedosphaerales	Pedosphaeraceae	SCGC_AAA164-E04	Genus: SCGC_AAA164-E04
7f8f32332716ce6a9459a1b604852282	0	VcPf1N	Unhealthy	Grotta_Vico	VC	White_Cave_Dweller	Cave	Ambient	P.ficiformis	No	Yes	PetrosiaVC	PF5	Bacteria	Verrucomicrobiota	Lentisphaeria	Victivallales	PRD18C08	PRD18C08	Genus: PRD18C08
92e9979e73125f81caa901ccda134e6e	0	VcPf1N	Unhealthy	Grotta_Vico	VC	White_Cave_Dweller	Cave	Ambient	P.ficiformis	No	Yes	PetrosiaVC	PF5	Bacteria	Verrucomicrobiota	Chlamydiae	Chlamydiales	Simkaniaceae	Family: Simkaniaceae	Family: Simkaniaceae
977fc49aaa76e1cf1eea9eb3e632742f	0	VcPf1N	Unhealthy	Grotta_Vico	VC	White_Cave_Dweller	Cave	Ambient	P.ficiformis	No	Yes	PetrosiaVC	PF5	Bacteria	Verrucomicrobiota	Lentisphaeria	P.palmC41	P.palmC41	P.palmC41	Genus: P.palmC41
bfa07883f4bf14c060f752e6ef2c1d9c	0	VcPf1N	Unhealthy	Grotta_Vico	VC	White_Cave_Dweller	Cave	Ambient	P.ficiformis	No	Yes	PetrosiaVC	PF5	Bacteria	Verrucomicrobiota	Verrucomicrobiae	Pedosphaerales	Pedosphaeraceae	SCGC_AAA164-E04	Genus: SCGC_AAA164-E04
d6a79416c0b360cb1c7da2b29c779121	0	VcPf1N	Unhealthy	Grotta_Vico	VC	White_Cave_Dweller	Cave	Ambient	P.ficiformis	No	Yes	PetrosiaVC	PF5	Bacteria	Verrucomicrobiota	Verrucomicrobiae	Opitutales	Puniceicoccaceae	Cerasicoccus	Genus: Cerasicoccus
e925277dd50305edd75f7673d9dc2b65	0	VcPf1N	Unhealthy	Grotta_Vico	VC	White_Cave_Dweller	Cave	Ambient	P.ficiformis	No	Yes	PetrosiaVC	PF5	Bacteria	Verrucomicrobiota	Chlamydiae	Chlamydiales	Parachlamydiaceae	Neochlamydia	Genus: Neochlamydia
ea7c0392d8e0e65d8856585104b862c8	0	VcPf1N	Unhealthy	Grotta_Vico	VC	White_Cave_Dweller	Cave	Ambient	P.ficiformis	No	Yes	PetrosiaVC	PF5	Bacteria	Verrucomicrobiota	Chlamydiae	Chlamydiales	Parachlamydiaceae	Neochlamydia	Genus: Neochlamydia
f8a56287040a654f8973a498e66cb6d6	0	VcPf1N	Unhealthy	Grotta_Vico	VC	White_Cave_Dweller	Cave	Ambient	P.ficiformis	No	Yes	PetrosiaVC	PF5	Bacteria	Verrucomicrobiota	Chlamydiae	Chlamydiales	Order: Chlamydiales	Order: Chlamydiales	Order: Chlamydiales
fc25742f256f0fbd9dc9cba821739ca4	0	VcPf1N	Unhealthy	Grotta_Vico	VC	White_Cave_Dweller	Cave	Ambient	P.ficiformis	No	Yes	PetrosiaVC	PF5	Bacteria	Verrucomicrobiota	Verrucomicrobiae	Opitutales	Puniceicoccaceae	Cerasicoccus	Genus: Cerasicoccus
cc95c4917aef52aacd55cf51bd9e7d60	0	VcPf1N	Unhealthy	Grotta_Vico	VC	White_Cave_Dweller	Cave	Ambient	P.ficiformis	No	Yes	PetrosiaVC	PF5	Bacteria	WPS-2	WPS-2	WPS-2	WPS-2	WPS-2	Genus: WPS-2
92c10ef09fc363087097e1d01f862252	24740	VcPf2N	Unhealthy	Grotta_Vico	VC	White_Cave_Dweller	Cave	Ambient	P.ficiformis	No	Yes	PetrosiaVC	PF5	Bacteria	Bacteroidota	Bacteroidia	Sphingobacteriales	Lentimicrobiaceae	Lentimicrobiaceae	Genus: Lentimicrobiaceae
d5fcb0562c0b62b28c2e8cb364e4ee4d	10860	VcPf2N	Unhealthy	Grotta_Vico	VC	White_Cave_Dweller	Cave	Ambient	P.ficiformis	No	Yes	PetrosiaVC	PF5	Bacteria	Cyanobacteria	Vampirivibrionia	Gastranaerophilales	Gastranaerophilales	Gastranaerophilales	Genus: Gastranaerophilales
1542218a28090f10626ae537e94debc4	5154	VcPf2N	Unhealthy	Grotta_Vico	VC	White_Cave_Dweller	Cave	Ambient	P.ficiformis	No	Yes	PetrosiaVC	PF5	Bacteria	Firmicutes	Clostridia	Christensenellales	Christensenellaceae	Family: Christensenellaceae	Family: Christensenellaceae
091b4a281e7e69282049c66fff20d34c	4771	VcPf2N	Unhealthy	Grotta_Vico	VC	White_Cave_Dweller	Cave	Ambient	P.ficiformis	No	Yes	PetrosiaVC	PF5	Bacteria	Verrucomicrobiota	Chlamydiae	Chlamydiales	Simkaniaceae	Family: Simkaniaceae	Family: Simkaniaceae
f5d32d7802a34cd4242d1ef82b5f90b1	3990	VcPf2N	Unhealthy	Grotta_Vico	VC	White_Cave_Dweller	Cave	Ambient	P.ficiformis	No	Yes	PetrosiaVC	PF5	Bacteria	Actinobacteriota	Acidimicrobiia	Microtrichales	Microtrichaceae	Sva0996_group	Genus: Sva0996_group
80c64d01bfa9e6b5a14d6a4266be20e9	2662	VcPf2N	Unhealthy	Grotta_Vico	VC	White_Cave_Dweller	Cave	Ambient	P.ficiformis	No	Yes	PetrosiaVC	PF5	Bacteria	Firmicutes	Clostridia	Peptostreptococcales-Tissierellales	Peptostreptococcales-Tissierellales	MCWD3	Genus: MCWD3
8e2575469919ac5a31bcb8bc6089ac1e	2096	VcPf2N	Unhealthy	Grotta_Vico	VC	White_Cave_Dweller	Cave	Ambient	P.ficiformis	No	Yes	PetrosiaVC	PF5	Bacteria	Proteobacteria	Alphaproteobacteria	Rhodobacterales	Rhodobacteraceae	Silicimonas	Genus: Silicimonas
bd84ba173f58aeb242728383473fb995	1550	VcPf2N	Unhealthy	Grotta_Vico	VC	White_Cave_Dweller	Cave	Ambient	P.ficiformis	No	Yes	PetrosiaVC	PF5	Bacteria	Firmicutes	Clostridia	Peptostreptococcales-Tissierellales	Caminicellaceae	Paramaledivibacter	Genus: Paramaledivibacter
4933083f402b0c20f01852c301cb35b2	1036	VcPf2N	Unhealthy	Grotta_Vico	VC	White_Cave_Dweller	Cave	Ambient	P.ficiformis	No	Yes	PetrosiaVC	PF5	Bacteria	Firmicutes	Clostridia	Lachnospirales	Order: Lachnospirales	Order: Lachnospirales	Order: Lachnospirales
3e28f2a37d1dab674fa4c14e7541b094	1014	VcPf2N	Unhealthy	Grotta_Vico	VC	White_Cave_Dweller	Cave	Ambient	P.ficiformis	No	Yes	PetrosiaVC	PF5	Bacteria	Planctomycetota	Planctomycetes	Planctomycetales	Order: Planctomycetales	Order: Planctomycetales	Order: Planctomycetales
9f257155da4d6c4ebadbfd31bb10cdc2	990	VcPf2N	Unhealthy	Grotta_Vico	VC	White_Cave_Dweller	Cave	Ambient	P.ficiformis	No	Yes	PetrosiaVC	PF5	Bacteria	Firmicutes	Clostridia	Lachnospirales	Order: Lachnospirales	Order: Lachnospirales	Order: Lachnospirales
ff422a9e9d333cc15d211e599c2dbafd	977	VcPf2N	Unhealthy	Grotta_Vico	VC	White_Cave_Dweller	Cave	Ambient	P.ficiformis	No	Yes	PetrosiaVC	PF5	Bacteria	Proteobacteria	Alphaproteobacteria	Rhizobiales	Rhizobiaceae	Pseudahrensia	Genus: Pseudahrensia
9f9c9629170cb5de6072c3932b1f657b	966	VcPf2N	Unhealthy	Grotta_Vico	VC	White_Cave_Dweller	Cave	Ambient	P.ficiformis	No	Yes	PetrosiaVC	PF5	Bacteria	Planctomycetota	Planctomycetes	Pirellulales	Pirellulaceae	Pir4_lineage	Genus: Pir4_lineage
d4e76296c2f087a0f712f8671a1fac2d	917	VcPf2N	Unhealthy	Grotta_Vico	VC	White_Cave_Dweller	Cave	Ambient	P.ficiformis	No	Yes	PetrosiaVC	PF5	Bacteria	Patescibacteria	Parcubacteria	Candidatus_Campbellbacteria	Candidatus_Campbellbacteria	Candidatus_Campbellbacteria	Genus: Candidatus_Campbellbacteria
a8925e3a0dff641f7b30c6ce179db493	915	VcPf2N	Unhealthy	Grotta_Vico	VC	White_Cave_Dweller	Cave	Ambient	P.ficiformis	No	Yes	PetrosiaVC	PF5	Bacteria	Cyanobacteria	Vampirivibrionia	Gastranaerophilales	Gastranaerophilales	Gastranaerophilales	Genus: Gastranaerophilales
e4ac7690abd6e33101493db3c7ef9d0b	796	VcPf2N	Unhealthy	Grotta_Vico	VC	White_Cave_Dweller	Cave	Ambient	P.ficiformis	No	Yes	PetrosiaVC	PF5	Bacteria	Planctomycetota	Planctomycetes	Planctomycetales	Order: Planctomycetales	Order: Planctomycetales	Order: Planctomycetales
185bd0ac3aa892cc28f88adf6aa04990	680	VcPf2N	Unhealthy	Grotta_Vico	VC	White_Cave_Dweller	Cave	Ambient	P.ficiformis	No	Yes	PetrosiaVC	PF5	Bacteria	Bacteroidota	Bacteroidia	Sphingobacteriales	Lentimicrobiaceae	Lentimicrobiaceae	Genus: Lentimicrobiaceae
56b1f6d12a2f7d429114028777af245e	676	VcPf2N	Unhealthy	Grotta_Vico	VC	White_Cave_Dweller	Cave	Ambient	P.ficiformis	No	Yes	PetrosiaVC	PF5	Bacteria	Spirochaetota	Spirochaetia	Spirochaetales	Spirochaetaceae	Spirochaeta_2	Genus: Spirochaeta_2
aedd383bce81eff5351b2f4b767b427c	616	VcPf2N	Unhealthy	Grotta_Vico	VC	White_Cave_Dweller	Cave	Ambient	P.ficiformis	No	Yes	PetrosiaVC	PF5	Bacteria	Bacteroidota	Bacteroidia	Chitinophagales	Saprospiraceae	Family: Saprospiraceae	Family: Saprospiraceae
69a4e63ce43fae026f1bb68b4938cf07	611	VcPf2N	Unhealthy	Grotta_Vico	VC	White_Cave_Dweller	Cave	Ambient	P.ficiformis	No	Yes	PetrosiaVC	PF5	Bacteria	Firmicutes	Clostridia	Lachnospirales	Lachnospiraceae	Vallitalea	Genus: Vallitalea
45451d1f78591c7f84a21073c28f0638	528	VcPf2N	Unhealthy	Grotta_Vico	VC	White_Cave_Dweller	Cave	Ambient	P.ficiformis	No	Yes	PetrosiaVC	PF5	Bacteria	Bacteroidota	Bacteroidia	Sphingobacteriales	Lentimicrobiaceae	Lentimicrobiaceae	Genus: Lentimicrobiaceae
aeb05fc151e2587db289cf08effc3726	525	VcPf2N	Unhealthy	Grotta_Vico	VC	White_Cave_Dweller	Cave	Ambient	P.ficiformis	No	Yes	PetrosiaVC	PF5	Bacteria	Proteobacteria	Alphaproteobacteria	Caulobacterales	Hyphomonadaceae	Family: Hyphomonadaceae	Family: Hyphomonadaceae
7ecccd5fafd7450a71095050fea9f671	465	VcPf2N	Unhealthy	Grotta_Vico	VC	White_Cave_Dweller	Cave	Ambient	P.ficiformis	No	Yes	PetrosiaVC	PF5	Bacteria	Proteobacteria	Alphaproteobacteria	Rhodobacterales	Rhodobacteraceae	Ruegeria	Genus: Ruegeria
36608d632cef5dae1775040abc027877	448	VcPf2N	Unhealthy	Grotta_Vico	VC	White_Cave_Dweller	Cave	Ambient	P.ficiformis	No	Yes	PetrosiaVC	PF5	Bacteria	Bacteroidota	Bacteroidia	Sphingobacteriales	Lentimicrobiaceae	Lentimicrobiaceae	Genus: Lentimicrobiaceae
df30c688315fea352755e049ba49b037	436	VcPf2N	Unhealthy	Grotta_Vico	VC	White_Cave_Dweller	Cave	Ambient	P.ficiformis	No	Yes	PetrosiaVC	PF5	Bacteria	Proteobacteria	Alphaproteobacteria	Rhodobacterales	Rhodobacteraceae	Family: Rhodobacteraceae	Family: Rhodobacteraceae
91f3272352b50ed45535dd9e285cff83	434	VcPf2N	Unhealthy	Grotta_Vico	VC	White_Cave_Dweller	Cave	Ambient	P.ficiformis	No	Yes	PetrosiaVC	PF5	Bacteria	Planctomycetota	Phycisphaerae	Phycisphaerales	Phycisphaeraceae	Family: Phycisphaeraceae	Family: Phycisphaeraceae
e591130b8ed48a7ac4739ca3bbc2e797	407	VcPf2N	Unhealthy	Grotta_Vico	VC	White_Cave_Dweller	Cave	Ambient	P.ficiformis	No	Yes	PetrosiaVC	PF5	Bacteria	Bacteroidota	Bacteroidia	Cytophagales	Cyclobacteriaceae	Ekhidna	Genus: Ekhidna
82f081de99630272c5ad89d3377ce4bc	378	VcPf2N	Unhealthy	Grotta_Vico	VC	White_Cave_Dweller	Cave	Ambient	P.ficiformis	No	Yes	PetrosiaVC	PF5	Bacteria	Firmicutes	Clostridia	Peptostreptococcales-Tissierellales	Caminicellaceae	Paramaledivibacter	Genus: Paramaledivibacter
0da5131d9d0fba61dc939f4c9e974819	374	VcPf2N	Unhealthy	Grotta_Vico	VC	White_Cave_Dweller	Cave	Ambient	P.ficiformis	No	Yes	PetrosiaVC	PF5	Bacteria	Planctomycetota	Planctomycetes	Pirellulales	Pirellulaceae	Bythopirellula	Genus: Bythopirellula
ca6d803969882326d7a703416e06c541	352	VcPf2N	Unhealthy	Grotta_Vico	VC	White_Cave_Dweller	Cave	Ambient	P.ficiformis	No	Yes	PetrosiaVC	PF5	Bacteria	Bacteroidota	Bacteroidia	Flavobacteriales	Flavobacteriaceae	Family: Flavobacteriaceae	Family: Flavobacteriaceae
657dd60445beed997adb0c94c9714da8	344	VcPf2N	Unhealthy	Grotta_Vico	VC	White_Cave_Dweller	Cave	Ambient	P.ficiformis	No	Yes	PetrosiaVC	PF5	Bacteria	Firmicutes	Clostridia	MAT-CR-H4-C10	MAT-CR-H4-C10	MAT-CR-H4-C10	Genus: MAT-CR-H4-C10
b1b8d9297c43420137d6425156bc5c0a	339	VcPf2N	Unhealthy	Grotta_Vico	VC	White_Cave_Dweller	Cave	Ambient	P.ficiformis	No	Yes	PetrosiaVC	PF5	Bacteria	Firmicutes	Clostridia	Lachnospirales	Lachnospiraceae	Vallitalea	Genus: Vallitalea
d713120fdb9c3ef1e0f06ceac69c42cb	337	VcPf2N	Unhealthy	Grotta_Vico	VC	White_Cave_Dweller	Cave	Ambient	P.ficiformis	No	Yes	PetrosiaVC	PF5	Bacteria	Proteobacteria	Alphaproteobacteria	Rhodobacterales	Rhodobacteraceae	Family: Rhodobacteraceae	Family: Rhodobacteraceae
22edd128b148689ef496dce6e7b31171	332	VcPf2N	Unhealthy	Grotta_Vico	VC	White_Cave_Dweller	Cave	Ambient	P.ficiformis	No	Yes	PetrosiaVC	PF5	Bacteria	Patescibacteria	Saccharimonadia	Saccharimonadales	Saccharimonadales	Saccharimonadales	Genus: Saccharimonadales
acd13437e0fdedc2dbb4f5d395af59f8	329	VcPf2N	Unhealthy	Grotta_Vico	VC	White_Cave_Dweller	Cave	Ambient	P.ficiformis	No	Yes	PetrosiaVC	PF5	Bacteria	Proteobacteria	Gammaproteobacteria	Pseudomonadales	Nitrincolaceae	Family: Nitrincolaceae	Family: Nitrincolaceae
cf5fc4400263532b4b10d21ed043038b	327	VcPf2N	Unhealthy	Grotta_Vico	VC	White_Cave_Dweller	Cave	Ambient	P.ficiformis	No	Yes	PetrosiaVC	PF5	Bacteria	Bacteroidota	Bacteroidia	Flavobacteriales	Flavobacteriaceae	Family: Flavobacteriaceae	Family: Flavobacteriaceae
e60bc503e7650bd2111bd93d497e462d	322	VcPf2N	Unhealthy	Grotta_Vico	VC	White_Cave_Dweller	Cave	Ambient	P.ficiformis	No	Yes	PetrosiaVC	PF5	Bacteria	Bacteroidota	Bacteroidia	Sphingobacteriales	Lentimicrobiaceae	Lentimicrobiaceae	Genus: Lentimicrobiaceae
25d638e6700633ca43ee2b90e092535f	321	VcPf2N	Unhealthy	Grotta_Vico	VC	White_Cave_Dweller	Cave	Ambient	P.ficiformis	No	Yes	PetrosiaVC	PF5	Bacteria	Proteobacteria	Gammaproteobacteria	Pseudomonadales	Nitrincolaceae	Family: Nitrincolaceae	Family: Nitrincolaceae
e9650dc35044b26202676edafe2299c6	320	VcPf2N	Unhealthy	Grotta_Vico	VC	White_Cave_Dweller	Cave	Ambient	P.ficiformis	No	Yes	PetrosiaVC	PF5	Bacteria	Proteobacteria	Alphaproteobacteria	Rhodobacterales	Rhodobacteraceae	Family: Rhodobacteraceae	Family: Rhodobacteraceae
913553895ac481d4068b211bfcba3b7f	314	VcPf2N	Unhealthy	Grotta_Vico	VC	White_Cave_Dweller	Cave	Ambient	P.ficiformis	No	Yes	PetrosiaVC	PF5	Bacteria	Cyanobacteria	Vampirivibrionia	Gastranaerophilales	Gastranaerophilales	Gastranaerophilales	Genus: Gastranaerophilales
179ce616b360fbb4652972885d8e5b84	307	VcPf2N	Unhealthy	Grotta_Vico	VC	White_Cave_Dweller	Cave	Ambient	P.ficiformis	No	Yes	PetrosiaVC	PF5	Bacteria	Proteobacteria	Alphaproteobacteria	Rhodobacterales	Rhodobacteraceae	Ruegeria	Genus: Ruegeria
a47f17dda1e5f32554991e39e89a7360	297	VcPf2N	Unhealthy	Grotta_Vico	VC	White_Cave_Dweller	Cave	Ambient	P.ficiformis	No	Yes	PetrosiaVC	PF5	Bacteria	Cyanobacteria	Vampirivibrionia	Gastranaerophilales	Gastranaerophilales	Gastranaerophilales	Genus: Gastranaerophilales
70c9ffb64ee450b31d8a1656a2fdcf04	284	VcPf2N	Unhealthy	Grotta_Vico	VC	White_Cave_Dweller	Cave	Ambient	P.ficiformis	No	Yes	PetrosiaVC	PF5	Bacteria	Bacteroidota	Bacteroidia	Bacteroidales	Prolixibacteraceae	Sunxiuqinia	Genus: Sunxiuqinia
98911f49c66daec8d9a1a6a6ced92a0a	277	VcPf2N	Unhealthy	Grotta_Vico	VC	White_Cave_Dweller	Cave	Ambient	P.ficiformis	No	Yes	PetrosiaVC	PF5	Bacteria	Proteobacteria	Alphaproteobacteria	Rhizobiales	Rhizobiaceae	Cohaesibacter	Genus: Cohaesibacter
395b5411b568358cfb0b7dc0e507a8b3	275	VcPf2N	Unhealthy	Grotta_Vico	VC	White_Cave_Dweller	Cave	Ambient	P.ficiformis	No	Yes	PetrosiaVC	PF5	Bacteria	Patescibacteria	Gracilibacteria	Gracilibacteria	Gracilibacteria	Gracilibacteria	Genus: Gracilibacteria
17a4c02dbd7320aaba32c4188007a7c1	270	VcPf2N	Unhealthy	Grotta_Vico	VC	White_Cave_Dweller	Cave	Ambient	P.ficiformis	No	Yes	PetrosiaVC	PF5	Bacteria	Bacteroidota	Bacteroidia	Bacteroidales	Prolixibacteraceae	Draconibacterium	Genus: Draconibacterium
eb6fcb8b8b07523364885e269b99983e	256	VcPf2N	Unhealthy	Grotta_Vico	VC	White_Cave_Dweller	Cave	Ambient	P.ficiformis	No	Yes	PetrosiaVC	PF5	Bacteria	Firmicutes	Clostridia	Lachnospirales	Lachnospiraceae	Vallitalea	Genus: Vallitalea
06d703f8a2b11ae9c294c1a0cf202e94	255	VcPf2N	Unhealthy	Grotta_Vico	VC	White_Cave_Dweller	Cave	Ambient	P.ficiformis	No	Yes	PetrosiaVC	PF5	Bacteria	Actinobacteriota	Acidimicrobiia	Microtrichales	Microtrichaceae	Sva0996_group	Genus: Sva0996_group
aedecedba4f68707fc4598ef3f7646c4	251	VcPf2N	Unhealthy	Grotta_Vico	VC	White_Cave_Dweller	Cave	Ambient	P.ficiformis	No	Yes	PetrosiaVC	PF5	Bacteria	Firmicutes	Clostridia	Oscillospirales	Hungateiclostridiaceae	Ruminiclostridium	Genus: Ruminiclostridium
0125241c38e67adea75aacf5dae0ad91	250	VcPf2N	Unhealthy	Grotta_Vico	VC	White_Cave_Dweller	Cave	Ambient	P.ficiformis	No	Yes	PetrosiaVC	PF5	Bacteria	Proteobacteria	Alphaproteobacteria	Parvibaculales	PS1_clade	PS1_clade	Genus: PS1_clade
38181760878749ab46304af8dac4344a	245	VcPf2N	Unhealthy	Grotta_Vico	VC	White_Cave_Dweller	Cave	Ambient	P.ficiformis	No	Yes	PetrosiaVC	PF5	Bacteria	Bacteroidota	Bacteroidia	Sphingobacteriales	Lentimicrobiaceae	Lentimicrobiaceae	Genus: Lentimicrobiaceae
7f93c883ae7b1c46e3fcd6d5eb4d5e24	244	VcPf2N	Unhealthy	Grotta_Vico	VC	White_Cave_Dweller	Cave	Ambient	P.ficiformis	No	Yes	PetrosiaVC	PF5	Bacteria	Firmicutes	Clostridia	Oscillospirales	Hungateiclostridiaceae	Ruminiclostridium	Genus: Ruminiclostridium
19d22459ec949b52fe9d64a21551109b	242	VcPf2N	Unhealthy	Grotta_Vico	VC	White_Cave_Dweller	Cave	Ambient	P.ficiformis	No	Yes	PetrosiaVC	PF5	Bacteria	Bacteroidota	Bacteroidia	Flavobacteriales	Flavobacteriaceae	Aquibacter	Genus: Aquibacter
58854ff785dd18ed6336b2bf51cc351e	240	VcPf2N	Unhealthy	Grotta_Vico	VC	White_Cave_Dweller	Cave	Ambient	P.ficiformis	No	Yes	PetrosiaVC	PF5	Bacteria	Proteobacteria	Alphaproteobacteria	Rhizobiales	Rhizobiaceae	Pseudahrensia	Genus: Pseudahrensia
347b70773bea277cdfdfef746e3073c9	235	VcPf2N	Unhealthy	Grotta_Vico	VC	White_Cave_Dweller	Cave	Ambient	P.ficiformis	No	Yes	PetrosiaVC	PF5	Bacteria	Proteobacteria	Alphaproteobacteria	Rhodobacterales	Rhodobacteraceae	Family: Rhodobacteraceae	Family: Rhodobacteraceae
0487c442bf115277e5bcc609cd80d09c	230	VcPf2N	Unhealthy	Grotta_Vico	VC	White_Cave_Dweller	Cave	Ambient	P.ficiformis	No	Yes	PetrosiaVC	PF5	Bacteria	Bacteroidota	Kapabacteria	Kapabacteriales	Kapabacteriales	Kapabacteriales	Genus: Kapabacteriales
58cfca7ecd4068b57b5db92a18050993	222	VcPf2N	Unhealthy	Grotta_Vico	VC	White_Cave_Dweller	Cave	Ambient	P.ficiformis	No	Yes	PetrosiaVC	PF5	Bacteria	Bacteroidota	Bacteroidia	Sphingobacteriales	Lentimicrobiaceae	Lentimicrobiaceae	Genus: Lentimicrobiaceae
adb957ca0cbafe1269751aecaa77bfdd	222	VcPf2N	Unhealthy	Grotta_Vico	VC	White_Cave_Dweller	Cave	Ambient	P.ficiformis	No	Yes	PetrosiaVC	PF5	Bacteria	Proteobacteria	Gammaproteobacteria	Chromatiales	Sedimenticolaceae	Family: Sedimenticolaceae	Family: Sedimenticolaceae
f182203a2bee83391f56db8a31db4e95	221	VcPf2N	Unhealthy	Grotta_Vico	VC	White_Cave_Dweller	Cave	Ambient	P.ficiformis	No	Yes	PetrosiaVC	PF5	Bacteria	Bacteroidota	Bacteroidia	Flavobacteriales	Flavobacteriaceae	Family: Flavobacteriaceae	Family: Flavobacteriaceae
013659e4f3ba442698aa1115b3af1665	219	VcPf2N	Unhealthy	Grotta_Vico	VC	White_Cave_Dweller	Cave	Ambient	P.ficiformis	No	Yes	PetrosiaVC	PF5	Bacteria	Planctomycetota	Planctomycetes	Pirellulales	Pirellulaceae	Blastopirellula	Genus: Blastopirellula
7b3730fe1361a4959204c53b8319796d	214	VcPf2N	Unhealthy	Grotta_Vico	VC	White_Cave_Dweller	Cave	Ambient	P.ficiformis	No	Yes	PetrosiaVC	PF5	Bacteria	Planctomycetota	Planctomycetes	Pirellulales	Pirellulaceae	Pirellula	Genus: Pirellula
40cd2c97304a7aef1fd02c14f5d0d71f	210	VcPf2N	Unhealthy	Grotta_Vico	VC	White_Cave_Dweller	Cave	Ambient	P.ficiformis	No	Yes	PetrosiaVC	PF5	Bacteria	Cyanobacteria	Vampirivibrionia	Gastranaerophilales	Gastranaerophilales	Gastranaerophilales	Genus: Gastranaerophilales
d282a7d531ae269eb5feaac4c977516b	206	VcPf2N	Unhealthy	Grotta_Vico	VC	White_Cave_Dweller	Cave	Ambient	P.ficiformis	No	Yes	PetrosiaVC	PF5	Bacteria	Proteobacteria	Alphaproteobacteria	Rhizobiales	Stappiaceae	Labrenzia	Genus: Labrenzia
9bb9e81e3bc64c7af1ee8e18d2ebea16	205	VcPf2N	Unhealthy	Grotta_Vico	VC	White_Cave_Dweller	Cave	Ambient	P.ficiformis	No	Yes	PetrosiaVC	PF5	Bacteria	Proteobacteria	Alphaproteobacteria	Rhodobacterales	Rhodobacteraceae	Family: Rhodobacteraceae	Family: Rhodobacteraceae
fd1dd23785a8ff130aa31f8389cccf02	202	VcPf2N	Unhealthy	Grotta_Vico	VC	White_Cave_Dweller	Cave	Ambient	P.ficiformis	No	Yes	PetrosiaVC	PF5	Bacteria	Bacteroidota	Bacteroidia	Flavobacteriales	Flavobacteriaceae	Muricauda	Genus: Muricauda
1a43529a6e9a157f71c0280c7dd598b6	201	VcPf2N	Unhealthy	Grotta_Vico	VC	White_Cave_Dweller	Cave	Ambient	P.ficiformis	No	Yes	PetrosiaVC	PF5	Bacteria	Proteobacteria	Alphaproteobacteria	Rhizobiales	Order: Rhizobiales	Order: Rhizobiales	Order: Rhizobiales
7c852a5ed86ac1dcf793b842cd35194d	195	VcPf2N	Unhealthy	Grotta_Vico	VC	White_Cave_Dweller	Cave	Ambient	P.ficiformis	No	Yes	PetrosiaVC	PF5	Bacteria	Planctomycetota	Planctomycetes	Pirellulales	Pirellulaceae	Pir4_lineage	Genus: Pir4_lineage
4180e8feaa48f6e7a3aaa4db7afe6a7f	190	VcPf2N	Unhealthy	Grotta_Vico	VC	White_Cave_Dweller	Cave	Ambient	P.ficiformis	No	Yes	PetrosiaVC	PF5	Bacteria	Planctomycetota	Phycisphaerae	Phycisphaerales	Phycisphaeraceae	SM1A02	Genus: SM1A02
34395efab2c6339a6c22573ead2408e4	184	VcPf2N	Unhealthy	Grotta_Vico	VC	White_Cave_Dweller	Cave	Ambient	P.ficiformis	No	Yes	PetrosiaVC	PF5	Bacteria	Proteobacteria	Alphaproteobacteria	Class: Alphaproteobacteria	Class: Alphaproteobacteria	Class: Alphaproteobacteria	Class: Alphaproteobacteria
473fba17218b860f9c4b09f5ad6fb9cc	183	VcPf2N	Unhealthy	Grotta_Vico	VC	White_Cave_Dweller	Cave	Ambient	P.ficiformis	No	Yes	PetrosiaVC	PF5	Bacteria	Bacteroidota	Bacteroidia	Bacteroidales	Marinifilaceae	Family: Marinifilaceae	Family: Marinifilaceae
30bdf79fd089d7d8fab5fabb64d6dd29	179	VcPf2N	Unhealthy	Grotta_Vico	VC	White_Cave_Dweller	Cave	Ambient	P.ficiformis	No	Yes	PetrosiaVC	PF5	Bacteria	Bacteroidota	Bacteroidia	Bacteroidales	Marinifilaceae	Family: Marinifilaceae	Family: Marinifilaceae
2b6c99ff387c1fc2f2480aeac41dfe04	176	VcPf2N	Unhealthy	Grotta_Vico	VC	White_Cave_Dweller	Cave	Ambient	P.ficiformis	No	Yes	PetrosiaVC	PF5	Bacteria	Patescibacteria	Gracilibacteria	JGI_0000069-P22	JGI_0000069-P22	JGI_0000069-P22	Genus: JGI_0000069-P22
b1fcd04bfe73e1a42865d8f87da3977e	175	VcPf2N	Unhealthy	Grotta_Vico	VC	White_Cave_Dweller	Cave	Ambient	P.ficiformis	No	Yes	PetrosiaVC	PF5	Bacteria	Cyanobacteria	Vampirivibrionia	Gastranaerophilales	Gastranaerophilales	Gastranaerophilales	Genus: Gastranaerophilales
e26eb17c63d112e9deb7d9fefa015fb1	174	VcPf2N	Unhealthy	Grotta_Vico	VC	White_Cave_Dweller	Cave	Ambient	P.ficiformis	No	Yes	PetrosiaVC	PF5	Bacteria	Proteobacteria	Alphaproteobacteria	Rhodobacterales	Rhodobacteraceae	Family: Rhodobacteraceae	Family: Rhodobacteraceae
2bfd7ec7f83eb3eaf972c29e82af0ab4	173	VcPf2N	Unhealthy	Grotta_Vico	VC	White_Cave_Dweller	Cave	Ambient	P.ficiformis	No	Yes	PetrosiaVC	PF5	Bacteria	Proteobacteria	Alphaproteobacteria	Rhodobacterales	Rhodobacteraceae	Ruegeria	Genus: Ruegeria
98d18f62d0ccedb268d77019be8a1a02	170	VcPf2N	Unhealthy	Grotta_Vico	VC	White_Cave_Dweller	Cave	Ambient	P.ficiformis	No	Yes	PetrosiaVC	PF5	Bacteria	Bacteroidota	Bacteroidia	Chitinophagales	Order: Chitinophagales	Order: Chitinophagales	Order: Chitinophagales
b88a14ca86dcd66c494b55f28f4166cc	168	VcPf2N	Unhealthy	Grotta_Vico	VC	White_Cave_Dweller	Cave	Ambient	P.ficiformis	No	Yes	PetrosiaVC	PF5	Bacteria	Patescibacteria	Gracilibacteria	Gracilibacteria	Gracilibacteria	Gracilibacteria	Genus: Gracilibacteria
f3d0fd0850a5a139fd798e81a661bc63	158	VcPf2N	Unhealthy	Grotta_Vico	VC	White_Cave_Dweller	Cave	Ambient	P.ficiformis	No	Yes	PetrosiaVC	PF5	Bacteria	Kingdom: Bacteria	Kingdom: Bacteria	Kingdom: Bacteria	Kingdom: Bacteria	Kingdom: Bacteria	Kingdom: Bacteria
2a3c0e8c87da8788323633351af90df2	157	VcPf2N	Unhealthy	Grotta_Vico	VC	White_Cave_Dweller	Cave	Ambient	P.ficiformis	No	Yes	PetrosiaVC	PF5	Bacteria	Firmicutes	Clostridia	Christensenellales	Christensenellaceae	Family: Christensenellaceae	Family: Christensenellaceae
52185da0808ef7e60cb9d07e1c0c4033	154	VcPf2N	Unhealthy	Grotta_Vico	VC	White_Cave_Dweller	Cave	Ambient	P.ficiformis	No	Yes	PetrosiaVC	PF5	Bacteria	Bacteroidota	Bacteroidia	Bacteroidales	Prolixibacteraceae	Roseimarinus	Prolixibacteraceae_bacterium
bd2bccc370d4b7f85be97a65a21f2f43	152	VcPf2N	Unhealthy	Grotta_Vico	VC	White_Cave_Dweller	Cave	Ambient	P.ficiformis	No	Yes	PetrosiaVC	PF5	Bacteria	Planctomycetota	Planctomycetes	Pirellulales	Pirellulaceae	Pir4_lineage	Genus: Pir4_lineage
8a82712713440ed626dc3b2628065995	150	VcPf2N	Unhealthy	Grotta_Vico	VC	White_Cave_Dweller	Cave	Ambient	P.ficiformis	No	Yes	PetrosiaVC	PF5	Bacteria	Proteobacteria	Alphaproteobacteria	Rhodobacterales	Rhodobacteraceae	Family: Rhodobacteraceae	Family: Rhodobacteraceae
3f379efe434351be8641ea6692aeb246	148	VcPf2N	Unhealthy	Grotta_Vico	VC	White_Cave_Dweller	Cave	Ambient	P.ficiformis	No	Yes	PetrosiaVC	PF5	Bacteria	Proteobacteria	Alphaproteobacteria	Sneathiellales	Sneathiellaceae	Sneathiella	Genus: Sneathiella
5303818b1be537c0c5062459bd7565a4	147	VcPf2N	Unhealthy	Grotta_Vico	VC	White_Cave_Dweller	Cave	Ambient	P.ficiformis	No	Yes	PetrosiaVC	PF5	Bacteria	Firmicutes	Clostridia	Lachnospirales	Lachnospiraceae	Family: Lachnospiraceae	Family: Lachnospiraceae
e2825d5d94cda5d796eb2e3a84d62cc9	146	VcPf2N	Unhealthy	Grotta_Vico	VC	White_Cave_Dweller	Cave	Ambient	P.ficiformis	No	Yes	PetrosiaVC	PF5	Bacteria	Bacteroidota	Bacteroidia	Cytophagales	Cyclobacteriaceae	Fabibacter	Genus: Fabibacter
52ef3b81baf214fef4487b88ab2322d5	146	VcPf2N	Unhealthy	Grotta_Vico	VC	White_Cave_Dweller	Cave	Ambient	P.ficiformis	No	Yes	PetrosiaVC	PF5	Bacteria	Firmicutes	Clostridia	Lachnospirales	Order: Lachnospirales	Order: Lachnospirales	Order: Lachnospirales
fc175afb404dca822b69e33f8d31482b	146	VcPf2N	Unhealthy	Grotta_Vico	VC	White_Cave_Dweller	Cave	Ambient	P.ficiformis	No	Yes	PetrosiaVC	PF5	Bacteria	Planctomycetota	Planctomycetes	Pirellulales	Pirellulaceae	Rubripirellula	Genus: Rubripirellula
15f22b1b620c2651d9c8f490082527c3	145	VcPf2N	Unhealthy	Grotta_Vico	VC	White_Cave_Dweller	Cave	Ambient	P.ficiformis	No	Yes	PetrosiaVC	PF5	Bacteria	Cyanobacteria	Vampirivibrionia	Gastranaerophilales	Gastranaerophilales	Gastranaerophilales	Genus: Gastranaerophilales
66ebe91d7cc67cec500c76d01706c739	142	VcPf2N	Unhealthy	Grotta_Vico	VC	White_Cave_Dweller	Cave	Ambient	P.ficiformis	No	Yes	PetrosiaVC	PF5	Bacteria	Firmicutes	Clostridia	Oscillospirales	Hungateiclostridiaceae	Family: Hungateiclostridiaceae	Family: Hungateiclostridiaceae
19d109d5317bb37bff1ad387836411a0	141	VcPf2N	Unhealthy	Grotta_Vico	VC	White_Cave_Dweller	Cave	Ambient	P.ficiformis	No	Yes	PetrosiaVC	PF5	Bacteria	Spirochaetota	Spirochaetia	Spirochaetales	Spirochaetaceae	Sediminispirochaeta	Genus: Sediminispirochaeta
a10bad54f114283f70d694a2a3be0f8f	139	VcPf2N	Unhealthy	Grotta_Vico	VC	White_Cave_Dweller	Cave	Ambient	P.ficiformis	No	Yes	PetrosiaVC	PF5	Bacteria	Firmicutes	Clostridia	Christensenellales	Christensenellaceae	Family: Christensenellaceae	Family: Christensenellaceae
33e48452d3c179f27188c0ba493e1c55	139	VcPf2N	Unhealthy	Grotta_Vico	VC	White_Cave_Dweller	Cave	Ambient	P.ficiformis	No	Yes	PetrosiaVC	PF5	Bacteria	Halanaerobiaeota	Halanaerobiia	Halanaerobiales	Halobacteroidaceae	Family: Halobacteroidaceae	Family: Halobacteroidaceae
65986b67b9bab86237ace5593f6b954d	139	VcPf2N	Unhealthy	Grotta_Vico	VC	White_Cave_Dweller	Cave	Ambient	P.ficiformis	No	Yes	PetrosiaVC	PF5	Bacteria	Proteobacteria	Alphaproteobacteria	Caulobacterales	Hyphomonadaceae	Family: Hyphomonadaceae	Family: Hyphomonadaceae
25906049e5663e466a5c64bf659aa032	138	VcPf2N	Unhealthy	Grotta_Vico	VC	White_Cave_Dweller	Cave	Ambient	P.ficiformis	No	Yes	PetrosiaVC	PF5	Bacteria	Proteobacteria	Alphaproteobacteria	Parvibaculales	Parvibaculaceae	Candidatus_Phaeomarinobacter	Candidatus_Phaeomarinobacter
232aafea289029e910643192e0dcefe5	137	VcPf2N	Unhealthy	Grotta_Vico	VC	White_Cave_Dweller	Cave	Ambient	P.ficiformis	No	Yes	PetrosiaVC	PF5	Bacteria	Planctomycetota	Phycisphaerae	Phycisphaerales	Phycisphaeraceae	SM1A02	Genus: SM1A02
bb6f81f94dda18207725ea14132dd42e	135	VcPf2N	Unhealthy	Grotta_Vico	VC	White_Cave_Dweller	Cave	Ambient	P.ficiformis	No	Yes	PetrosiaVC	PF5	Bacteria	Bacteroidota	Bacteroidia	Flavobacteriales	Crocinitomicaceae	Crocinitomix	Genus: Crocinitomix
aed7235d12b16c7b33c6305980df0586	135	VcPf2N	Unhealthy	Grotta_Vico	VC	White_Cave_Dweller	Cave	Ambient	P.ficiformis	No	Yes	PetrosiaVC	PF5	Bacteria	Proteobacteria	Alphaproteobacteria	Class: Alphaproteobacteria	Class: Alphaproteobacteria	Class: Alphaproteobacteria	Class: Alphaproteobacteria
97fd89e62586f94b409e80cef131346f	134	VcPf2N	Unhealthy	Grotta_Vico	VC	White_Cave_Dweller	Cave	Ambient	P.ficiformis	No	Yes	PetrosiaVC	PF5	Bacteria	Desulfobacterota	Desulfobacteria	Desulfobacterales	Desulfobacteraceae	Family: Desulfobacteraceae	Family: Desulfobacteraceae
225726c7c7861c9724f3862671b44af2	131	VcPf2N	Unhealthy	Grotta_Vico	VC	White_Cave_Dweller	Cave	Ambient	P.ficiformis	No	Yes	PetrosiaVC	PF5	Bacteria	Myxococcota	Polyangia	Polyangiales	Sandaracinaceae	Sandaracinus	Genus: Sandaracinus
00e152015e7b83615648b5b5b1e07ba1	130	VcPf2N	Unhealthy	Grotta_Vico	VC	White_Cave_Dweller	Cave	Ambient	P.ficiformis	No	Yes	PetrosiaVC	PF5	Bacteria	Firmicutes	Clostridia	Peptostreptococcales-Tissierellales	Caminicellaceae	Paramaledivibacter	Genus: Paramaledivibacter
a3dbc6933818327966f71e1d6f0e754f	130	VcPf2N	Unhealthy	Grotta_Vico	VC	White_Cave_Dweller	Cave	Ambient	P.ficiformis	No	Yes	PetrosiaVC	PF5	Bacteria	Proteobacteria	Alphaproteobacteria	Rhizobiales	Stappiaceae	Labrenzia	Genus: Labrenzia
d3d5eef27023c988430b4b1be533f866	130	VcPf2N	Unhealthy	Grotta_Vico	VC	White_Cave_Dweller	Cave	Ambient	P.ficiformis	No	Yes	PetrosiaVC	PF5	Bacteria	Proteobacteria	Gammaproteobacteria	Pseudomonadales	Halieaceae	Halioglobus	Genus: Halioglobus
e2352d6047e231b821bb1ff5fe17bbb3	128	VcPf2N	Unhealthy	Grotta_Vico	VC	White_Cave_Dweller	Cave	Ambient	P.ficiformis	No	Yes	PetrosiaVC	PF5	Bacteria	Bacteroidota	Bacteroidia	Bacteroidetes_VC2.1_Bac22	Bacteroidetes_VC2.1_Bac22	Bacteroidetes_VC2.1_Bac22	Genus: Bacteroidetes_VC2.1_Bac22
d13ef7818c89584ead10559e232e2408	128	VcPf2N	Unhealthy	Grotta_Vico	VC	White_Cave_Dweller	Cave	Ambient	P.ficiformis	No	Yes	PetrosiaVC	PF5	Bacteria	Proteobacteria	Alphaproteobacteria	Rhizobiales	Hyphomicrobiaceae	Filomicrobium	Genus: Filomicrobium
7af78fc13945e1edbd26735554b032c0	127	VcPf2N	Unhealthy	Grotta_Vico	VC	White_Cave_Dweller	Cave	Ambient	P.ficiformis	No	Yes	PetrosiaVC	PF5	Bacteria	Proteobacteria	Alphaproteobacteria	Caulobacterales	Parvularculaceae	Parvularcula	Genus: Parvularcula
9cbfc1610f387bc67d99ceed432f219b	126	VcPf2N	Unhealthy	Grotta_Vico	VC	White_Cave_Dweller	Cave	Ambient	P.ficiformis	No	Yes	PetrosiaVC	PF5	Bacteria	Gemmatimonadota	BD2-11_terrestrial	BD2-11_terrestrial	BD2-11_terrestrial	BD2-11_terrestrial	Genus: BD2-11_terrestrial
36026851f9aede9dedc3268a30e20399	123	VcPf2N	Unhealthy	Grotta_Vico	VC	White_Cave_Dweller	Cave	Ambient	P.ficiformis	No	Yes	PetrosiaVC	PF5	Bacteria	Planctomycetota	Phycisphaerae	Phycisphaerales	Phycisphaeraceae	SM1A02	Genus: SM1A02
c555e572ada4bab560c47f112f147482	121	VcPf2N	Unhealthy	Grotta_Vico	VC	White_Cave_Dweller	Cave	Ambient	P.ficiformis	No	Yes	PetrosiaVC	PF5	Bacteria	Bacteroidota	Bacteroidia	Flavobacteriales	Flavobacteriaceae	Family: Flavobacteriaceae	Family: Flavobacteriaceae
ad0994f60f424ac4f430dd180c928a13	121	VcPf2N	Unhealthy	Grotta_Vico	VC	White_Cave_Dweller	Cave	Ambient	P.ficiformis	No	Yes	PetrosiaVC	PF5	Bacteria	Proteobacteria	Alphaproteobacteria	Rhizobiales	Stappiaceae	Labrenzia	Genus: Labrenzia
949a2c2434f4cbdac80ea0ceb21e14fa	119	VcPf2N	Unhealthy	Grotta_Vico	VC	White_Cave_Dweller	Cave	Ambient	P.ficiformis	No	Yes	PetrosiaVC	PF5	Bacteria	Planctomycetota	Planctomycetes	Planctomycetales	Rubinisphaeraceae	Family: Rubinisphaeraceae	Family: Rubinisphaeraceae
82cabbc8835f00e46af1413c01d4d69a	118	VcPf2N	Unhealthy	Grotta_Vico	VC	White_Cave_Dweller	Cave	Ambient	P.ficiformis	No	Yes	PetrosiaVC	PF5	Bacteria	Proteobacteria	Alphaproteobacteria	Rhizobiales	Rhizobiaceae	Cohaesibacter	Genus: Cohaesibacter
55447b2ebc99578766bbf612b99bd204	117	VcPf2N	Unhealthy	Grotta_Vico	VC	White_Cave_Dweller	Cave	Ambient	P.ficiformis	No	Yes	PetrosiaVC	PF5	Bacteria	Firmicutes	Clostridia	Christensenellales	Christensenellaceae	Family: Christensenellaceae	Family: Christensenellaceae
bde27bb8e3b68b0e98aa604ac47994bf	117	VcPf2N	Unhealthy	Grotta_Vico	VC	White_Cave_Dweller	Cave	Ambient	P.ficiformis	No	Yes	PetrosiaVC	PF5	Bacteria	Planctomycetota	Phycisphaerae	Phycisphaerales	Phycisphaeraceae	SM1A02	Genus: SM1A02
1eea9ba5b1c809acf260065653fd7d24	116	VcPf2N	Unhealthy	Grotta_Vico	VC	White_Cave_Dweller	Cave	Ambient	P.ficiformis	No	Yes	PetrosiaVC	PF5	Bacteria	Bacteroidota	Bacteroidia	Bacteroidales	Marinilabiliaceae	Family: Marinilabiliaceae	Family: Marinilabiliaceae
7e77d23f83b76bb5090b4761401fea03	116	VcPf2N	Unhealthy	Grotta_Vico	VC	White_Cave_Dweller	Cave	Ambient	P.ficiformis	No	Yes	PetrosiaVC	PF5	Bacteria	Bacteroidota	Bacteroidia	Flavobacteriales	Cryomorphaceae	Family: Cryomorphaceae	Family: Cryomorphaceae
836b0c5ac747695f9abe53cf1a1e38b5	113	VcPf2N	Unhealthy	Grotta_Vico	VC	White_Cave_Dweller	Cave	Ambient	P.ficiformis	No	Yes	PetrosiaVC	PF5	Bacteria	Desulfobacterota	Desulfovibrionia	Desulfovibrionales	Desulfovibrionaceae	Halodesulfovibrio	Genus: Halodesulfovibrio
b43c47fbd172389695d8a8f95dc0be7e	113	VcPf2N	Unhealthy	Grotta_Vico	VC	White_Cave_Dweller	Cave	Ambient	P.ficiformis	No	Yes	PetrosiaVC	PF5	Bacteria	Proteobacteria	Alphaproteobacteria	Rhodobacterales	Rhodobacteraceae	Roseovarius	Genus: Roseovarius
5b09048fa0a34e3c1508de3a5a9527b0	112	VcPf2N	Unhealthy	Grotta_Vico	VC	White_Cave_Dweller	Cave	Ambient	P.ficiformis	No	Yes	PetrosiaVC	PF5	Bacteria	Proteobacteria	Alphaproteobacteria	Rhizobiales	Stappiaceae	Labrenzia	Genus: Labrenzia
4cfef261b18bbf2edd988306c95a7589	111	VcPf2N	Unhealthy	Grotta_Vico	VC	White_Cave_Dweller	Cave	Ambient	P.ficiformis	No	Yes	PetrosiaVC	PF5	Bacteria	Proteobacteria	Alphaproteobacteria	Kordiimonadales	Order: Kordiimonadales	Order: Kordiimonadales	Order: Kordiimonadales
6d3632571a730b6cd788ec033f162cc7	110	VcPf2N	Unhealthy	Grotta_Vico	VC	White_Cave_Dweller	Cave	Ambient	P.ficiformis	No	Yes	PetrosiaVC	PF5	Bacteria	Firmicutes	Clostridia	Clostridia_vadinBB60	Clostridia_vadinBB60	Clostridia_vadinBB60	Genus: Clostridia_vadinBB60
8ae3883b646d42aae6f4f16c2ed0a469	110	VcPf2N	Unhealthy	Grotta_Vico	VC	White_Cave_Dweller	Cave	Ambient	P.ficiformis	No	Yes	PetrosiaVC	PF5	Bacteria	Planctomycetota	Phycisphaerae	Phycisphaerales	Phycisphaeraceae	SM1A02	Genus: SM1A02
7a49b987491ce7da736c1f689b33b50a	108	VcPf2N	Unhealthy	Grotta_Vico	VC	White_Cave_Dweller	Cave	Ambient	P.ficiformis	No	Yes	PetrosiaVC	PF5	Bacteria	Desulfobacterota	Desulfobacteria	Desulfobacterales	Desulfobacteraceae	Desulfobacter	Genus: Desulfobacter
37c56a05fe8103777b01fbf609658b28	108	VcPf2N	Unhealthy	Grotta_Vico	VC	White_Cave_Dweller	Cave	Ambient	P.ficiformis	No	Yes	PetrosiaVC	PF5	Bacteria	Firmicutes	Clostridia	Peptostreptococcales-Tissierellales	Anaerovoracaceae	Family: Anaerovoracaceae	Family: Anaerovoracaceae
81e1c27062723125ed307460450e5658	106	VcPf2N	Unhealthy	Grotta_Vico	VC	White_Cave_Dweller	Cave	Ambient	P.ficiformis	No	Yes	PetrosiaVC	PF5	Bacteria	Proteobacteria	Alphaproteobacteria	Rhizobiales	Hyphomicrobiaceae	Filomicrobium	Genus: Filomicrobium
97f377f1e398a2f5bf120bda612be2f2	105	VcPf2N	Unhealthy	Grotta_Vico	VC	White_Cave_Dweller	Cave	Ambient	P.ficiformis	No	Yes	PetrosiaVC	PF5	Bacteria	Firmicutes	Clostridia	Peptostreptococcales-Tissierellales	Caminicellaceae	Paramaledivibacter	Genus: Paramaledivibacter
f7aecbfe4b9c7a13a63bef691710c2e7	102	VcPf2N	Unhealthy	Grotta_Vico	VC	White_Cave_Dweller	Cave	Ambient	P.ficiformis	No	Yes	PetrosiaVC	PF5	Bacteria	Patescibacteria	ABY1	Candidatus_Kuenenbacteria	Candidatus_Kuenenbacteria	Candidatus_Kuenenbacteria	Genus: Candidatus_Kuenenbacteria
469fd23e40b209476262c0ed2f064d54	102	VcPf2N	Unhealthy	Grotta_Vico	VC	White_Cave_Dweller	Cave	Ambient	P.ficiformis	No	Yes	PetrosiaVC	PF5	Bacteria	Proteobacteria	Gammaproteobacteria	Legionellales	Legionellaceae	Family: Legionellaceae	Family: Legionellaceae
7d2e3664d5b1e8b3935b177d8afd9968	100	VcPf2N	Unhealthy	Grotta_Vico	VC	White_Cave_Dweller	Cave	Ambient	P.ficiformis	No	Yes	PetrosiaVC	PF5	Bacteria	Planctomycetota	Planctomycetes	Pirellulales	Pirellulaceae	Blastopirellula	Genus: Blastopirellula
1e062f03e3cad4e7491be66eaa6f531f	98	VcPf2N	Unhealthy	Grotta_Vico	VC	White_Cave_Dweller	Cave	Ambient	P.ficiformis	No	Yes	PetrosiaVC	PF5	Bacteria	Proteobacteria	Alphaproteobacteria	Rhodobacterales	Rhodobacteraceae	Family: Rhodobacteraceae	Family: Rhodobacteraceae
5c3bbf330998482a4f281aedc1250c00	98	VcPf2N	Unhealthy	Grotta_Vico	VC	White_Cave_Dweller	Cave	Ambient	P.ficiformis	No	Yes	PetrosiaVC	PF5	Bacteria	Proteobacteria	Alphaproteobacteria	Rhizobiales	Hyphomicrobiaceae	Filomicrobium	Genus: Filomicrobium
e99606b3903bb640213ed7aca75a8aeb	96	VcPf2N	Unhealthy	Grotta_Vico	VC	White_Cave_Dweller	Cave	Ambient	P.ficiformis	No	Yes	PetrosiaVC	PF5	Bacteria	Planctomycetota	Planctomycetes	Planctomycetales	Rubinisphaeraceae	Rubinisphaera	Genus: Rubinisphaera
f76a447559e2a5aac80165a1cebe6137	96	VcPf2N	Unhealthy	Grotta_Vico	VC	White_Cave_Dweller	Cave	Ambient	P.ficiformis	No	Yes	PetrosiaVC	PF5	Bacteria	Proteobacteria	Alphaproteobacteria	Micavibrionales	Micavibrionaceae	Family: Micavibrionaceae	Family: Micavibrionaceae
5f7aaf4212fa91824b26ab00d6d6fe3b	95	VcPf2N	Unhealthy	Grotta_Vico	VC	White_Cave_Dweller	Cave	Ambient	P.ficiformis	No	Yes	PetrosiaVC	PF5	Bacteria	Proteobacteria	Alphaproteobacteria	Caulobacterales	Hyphomonadaceae	Family: Hyphomonadaceae	Family: Hyphomonadaceae
64444d08a96527c5e2706b874332fb69	94	VcPf2N	Unhealthy	Grotta_Vico	VC	White_Cave_Dweller	Cave	Ambient	P.ficiformis	No	Yes	PetrosiaVC	PF5	Bacteria	Firmicutes	Clostridia	Class: Clostridia	Class: Clostridia	Class: Clostridia	Class: Clostridia
14636cb561481c62ee5049b694620f69	93	VcPf2N	Unhealthy	Grotta_Vico	VC	White_Cave_Dweller	Cave	Ambient	P.ficiformis	No	Yes	PetrosiaVC	PF5	Bacteria	Firmicutes	Clostridia	Christensenellales	Christensenellaceae	Family: Christensenellaceae	Family: Christensenellaceae
92e9979e73125f81caa901ccda134e6e	92	VcPf2N	Unhealthy	Grotta_Vico	VC	White_Cave_Dweller	Cave	Ambient	P.ficiformis	No	Yes	PetrosiaVC	PF5	Bacteria	Verrucomicrobiota	Chlamydiae	Chlamydiales	Simkaniaceae	Family: Simkaniaceae	Family: Simkaniaceae
5ac7a49d5f54c608d49fe0fba33570b5	91	VcPf2N	Unhealthy	Grotta_Vico	VC	White_Cave_Dweller	Cave	Ambient	P.ficiformis	No	Yes	PetrosiaVC	PF5	Bacteria	Cyanobacteria	Vampirivibrionia	Gastranaerophilales	Gastranaerophilales	Gastranaerophilales	Genus: Gastranaerophilales
39e4a85baca4f19064eb98d7b8313261	91	VcPf2N	Unhealthy	Grotta_Vico	VC	White_Cave_Dweller	Cave	Ambient	P.ficiformis	No	Yes	PetrosiaVC	PF5	Bacteria	Desulfobacterota	Desulfobacteria	Desulfobacterales	Desulfobacteraceae	Family: Desulfobacteraceae	Family: Desulfobacteraceae
92e78f5d8809ff2c9ae60e0004bcc094	90	VcPf2N	Unhealthy	Grotta_Vico	VC	White_Cave_Dweller	Cave	Ambient	P.ficiformis	No	Yes	PetrosiaVC	PF5	Bacteria	Planctomycetota	Phycisphaerae	Phycisphaerales	Phycisphaeraceae	SM1A02	Genus: SM1A02
1ec3d79a4ccd20b0d0e43f1eae1607f1	89	VcPf2N	Unhealthy	Grotta_Vico	VC	White_Cave_Dweller	Cave	Ambient	P.ficiformis	No	Yes	PetrosiaVC	PF5	Bacteria	Bacteroidota	Kapabacteria	Kapabacteriales	Kapabacteriales	Kapabacteriales	Genus: Kapabacteriales
fc1bfe31c76aff4bf963b830a31689b4	89	VcPf2N	Unhealthy	Grotta_Vico	VC	White_Cave_Dweller	Cave	Ambient	P.ficiformis	No	Yes	PetrosiaVC	PF5	Bacteria	Bacteroidota	Bacteroidia	Flavobacteriales	Cryomorphaceae	Vicingus	Genus: Vicingus
3eacb51fa140952afc88c70e4fc4b4e8	88	VcPf2N	Unhealthy	Grotta_Vico	VC	White_Cave_Dweller	Cave	Ambient	P.ficiformis	No	Yes	PetrosiaVC	PF5	Bacteria	Bacteroidota	Bacteroidia	Bacteroidetes_VC2.1_Bac22	Bacteroidetes_VC2.1_Bac22	Bacteroidetes_VC2.1_Bac22	Genus: Bacteroidetes_VC2.1_Bac22
0043a41bc540b341ce58a7e9cf578671	87	VcPf2N	Unhealthy	Grotta_Vico	VC	White_Cave_Dweller	Cave	Ambient	P.ficiformis	No	Yes	PetrosiaVC	PF5	Bacteria	Planctomycetota	Phycisphaerae	Phycisphaerales	Phycisphaeraceae	SM1A02	Genus: SM1A02
8402e9613e116fabad5c979137d3a787	87	VcPf2N	Unhealthy	Grotta_Vico	VC	White_Cave_Dweller	Cave	Ambient	P.ficiformis	No	Yes	PetrosiaVC	PF5	Bacteria	Planctomycetota	Phycisphaerae	Phycisphaerales	Phycisphaeraceae	SM1A02	Genus: SM1A02
1f86c39c6ca6e0e0d8b32fd7698a1bf9	87	VcPf2N	Unhealthy	Grotta_Vico	VC	White_Cave_Dweller	Cave	Ambient	P.ficiformis	No	Yes	PetrosiaVC	PF5	Bacteria	Proteobacteria	Alphaproteobacteria	Rhizobiales	Hyphomicrobiaceae	Filomicrobium	Genus: Filomicrobium
5c3512c6a372904177f16174f0d26680	86	VcPf2N	Unhealthy	Grotta_Vico	VC	White_Cave_Dweller	Cave	Ambient	P.ficiformis	No	Yes	PetrosiaVC	PF5	Bacteria	Desulfobacterota	Desulfobacteria	Desulfobacterales	Desulfobacteraceae	Family: Desulfobacteraceae	Family: Desulfobacteraceae
4a113aa704c3ef3211b8fdd5ec8ee537	86	VcPf2N	Unhealthy	Grotta_Vico	VC	White_Cave_Dweller	Cave	Ambient	P.ficiformis	No	Yes	PetrosiaVC	PF5	Bacteria	Firmicutes	Clostridia	Oscillospirales	Hungateiclostridiaceae	Family: Hungateiclostridiaceae	Family: Hungateiclostridiaceae
83514ed600ec07850a811e9625e7ea68	85	VcPf2N	Unhealthy	Grotta_Vico	VC	White_Cave_Dweller	Cave	Ambient	P.ficiformis	No	Yes	PetrosiaVC	PF5	Bacteria	Bacteroidota	Bacteroidia	Bacteroidales	Marinifilaceae	Family: Marinifilaceae	Family: Marinifilaceae
a462126264e22e118617147fed400e56	84	VcPf2N	Unhealthy	Grotta_Vico	VC	White_Cave_Dweller	Cave	Ambient	P.ficiformis	No	Yes	PetrosiaVC	PF5	Bacteria	Proteobacteria	Gammaproteobacteria	Enterobacterales	Vibrionaceae	Vibrio	Genus: Vibrio
56d4862a419e604bc22596025772b914	83	VcPf2N	Unhealthy	Grotta_Vico	VC	White_Cave_Dweller	Cave	Ambient	P.ficiformis	No	Yes	PetrosiaVC	PF5	Bacteria	Proteobacteria	Alphaproteobacteria	Rhizobiales	Stappiaceae	Labrenzia	Genus: Labrenzia
5f74e119cb8f0240b23bd20efe96a551	83	VcPf2N	Unhealthy	Grotta_Vico	VC	White_Cave_Dweller	Cave	Ambient	P.ficiformis	No	Yes	PetrosiaVC	PF5	Bacteria	Proteobacteria	Alphaproteobacteria	Rhodobacterales	Rhodobacteraceae	Family: Rhodobacteraceae	Family: Rhodobacteraceae
ab4105e31b7fd5ddd7d089b4abc4262b	83	VcPf2N	Unhealthy	Grotta_Vico	VC	White_Cave_Dweller	Cave	Ambient	P.ficiformis	No	Yes	PetrosiaVC	PF5	Bacteria	Proteobacteria	Alphaproteobacteria	Rhodobacterales	Rhodobacteraceae	Family: Rhodobacteraceae	Family: Rhodobacteraceae
093f2e1b46d8e5022402f44f122ac85b	82	VcPf2N	Unhealthy	Grotta_Vico	VC	White_Cave_Dweller	Cave	Ambient	P.ficiformis	No	Yes	PetrosiaVC	PF5	Bacteria	Patescibacteria	Parcubacteria	Candidatus_Kaiserbacteria	Candidatus_Kaiserbacteria	Candidatus_Kaiserbacteria	Genus: Candidatus_Kaiserbacteria
938839fef9782fe98b1cd6521c60cc8c	80	VcPf2N	Unhealthy	Grotta_Vico	VC	White_Cave_Dweller	Cave	Ambient	P.ficiformis	No	Yes	PetrosiaVC	PF5	Bacteria	Actinobacteriota	Acidimicrobiia	Microtrichales	Microtrichaceae	Sva0996_group	Genus: Sva0996_group
ed4a56b1e43eede2cbd3b121f3dce2f0	80	VcPf2N	Unhealthy	Grotta_Vico	VC	White_Cave_Dweller	Cave	Ambient	P.ficiformis	No	Yes	PetrosiaVC	PF5	Bacteria	Planctomycetota	Phycisphaerae	Phycisphaerales	Phycisphaeraceae	SM1A02	Genus: SM1A02
0426a18565e9c3e29076b37afce134f3	80	VcPf2N	Unhealthy	Grotta_Vico	VC	White_Cave_Dweller	Cave	Ambient	P.ficiformis	No	Yes	PetrosiaVC	PF5	Bacteria	Proteobacteria	Gammaproteobacteria	Arenicellales	Arenicellaceae	Arenicella	Genus: Arenicella
13d1aa480b520c6cfae217e8bd8824ef	80	VcPf2N	Unhealthy	Grotta_Vico	VC	White_Cave_Dweller	Cave	Ambient	P.ficiformis	No	Yes	PetrosiaVC	PF5	Bacteria	Proteobacteria	Alphaproteobacteria	Micavibrionales	Micavibrionaceae	Family: Micavibrionaceae	Family: Micavibrionaceae
eb7b16e047f7063c0c1a1e5758ede808	79	VcPf2N	Unhealthy	Grotta_Vico	VC	White_Cave_Dweller	Cave	Ambient	P.ficiformis	No	Yes	PetrosiaVC	PF5	Bacteria	Planctomycetota	Planctomycetes	Pirellulales	Pirellulaceae	Rhodopirellula	planctomycete_MS30D1
313740c3d458b49c1310544c7080affc	79	VcPf2N	Unhealthy	Grotta_Vico	VC	White_Cave_Dweller	Cave	Ambient	P.ficiformis	No	Yes	PetrosiaVC	PF5	Bacteria	Proteobacteria	Alphaproteobacteria	Rhodobacterales	Rhodobacteraceae	Ruegeria	Genus: Ruegeria
7c816ad333917cdac8bdfa06b8a2f910	78	VcPf2N	Unhealthy	Grotta_Vico	VC	White_Cave_Dweller	Cave	Ambient	P.ficiformis	No	Yes	PetrosiaVC	PF5	Bacteria	Planctomycetota	OM190	OM190	OM190	OM190	Genus: OM190
f8e2cb98ba8d804cfdbe6525b8cd1b41	78	VcPf2N	Unhealthy	Grotta_Vico	VC	White_Cave_Dweller	Cave	Ambient	P.ficiformis	No	Yes	PetrosiaVC	PF5	Bacteria	Planctomycetota	Phycisphaerae	Phycisphaerales	Phycisphaeraceae	SM1A02	Genus: SM1A02
e842ad6be7706b920fdc3ae472758f28	77	VcPf2N	Unhealthy	Grotta_Vico	VC	White_Cave_Dweller	Cave	Ambient	P.ficiformis	No	Yes	PetrosiaVC	PF5	Bacteria	Proteobacteria	Alphaproteobacteria	Rhodospirillales	Magnetospiraceae	Family: Magnetospiraceae	Family: Magnetospiraceae
0f34cc6ca4b338c45568d152259435e9	75	VcPf2N	Unhealthy	Grotta_Vico	VC	White_Cave_Dweller	Cave	Ambient	P.ficiformis	No	Yes	PetrosiaVC	PF5	Bacteria	Proteobacteria	Alphaproteobacteria	Kordiimonadales	Order: Kordiimonadales	Order: Kordiimonadales	Order: Kordiimonadales
d25fd36567790cba843bfa044af8dc0b	75	VcPf2N	Unhealthy	Grotta_Vico	VC	White_Cave_Dweller	Cave	Ambient	P.ficiformis	No	Yes	PetrosiaVC	PF5	Bacteria	Proteobacteria	Alphaproteobacteria	Rickettsiales	SM2D12	SM2D12	Genus: SM2D12
eccad6e4b63dccb4feecc5857395b518	75	VcPf2N	Unhealthy	Grotta_Vico	VC	White_Cave_Dweller	Cave	Ambient	P.ficiformis	No	Yes	PetrosiaVC	PF5	Bacteria	Proteobacteria	Gammaproteobacteria	Pseudomonadales	Spongiibacteraceae	Family: Spongiibacteraceae	Family: Spongiibacteraceae
6db7dc208f8367313b961e22131022ca	74	VcPf2N	Unhealthy	Grotta_Vico	VC	White_Cave_Dweller	Cave	Ambient	P.ficiformis	No	Yes	PetrosiaVC	PF5	Bacteria	Patescibacteria	Gracilibacteria	JGI_0000069-P22	JGI_0000069-P22	JGI_0000069-P22	Genus: JGI_0000069-P22
a04cafbce473200d881baa8169b0f3d5	73	VcPf2N	Unhealthy	Grotta_Vico	VC	White_Cave_Dweller	Cave	Ambient	P.ficiformis	No	Yes	PetrosiaVC	PF5	Bacteria	Firmicutes	Clostridia	Clostridia_vadinBB60	Clostridia_vadinBB60	Clostridia_vadinBB60	Genus: Clostridia_vadinBB60
7a306923cde42327ff1e2569d95db4be	73	VcPf2N	Unhealthy	Grotta_Vico	VC	White_Cave_Dweller	Cave	Ambient	P.ficiformis	No	Yes	PetrosiaVC	PF5	Bacteria	Planctomycetota	Phycisphaerae	Phycisphaerales	Phycisphaeraceae	SM1A02	Genus: SM1A02
2816aca459236a68e767efb4fde783d7	73	VcPf2N	Unhealthy	Grotta_Vico	VC	White_Cave_Dweller	Cave	Ambient	P.ficiformis	No	Yes	PetrosiaVC	PF5	Bacteria	Proteobacteria	Gammaproteobacteria	Pseudomonadales	Saccharospirillaceae	Oleispira	Genus: Oleispira
56be9c68cc977b541b255fa7c77ea2b9	73	VcPf2N	Unhealthy	Grotta_Vico	VC	White_Cave_Dweller	Cave	Ambient	P.ficiformis	No	Yes	PetrosiaVC	PF5	Bacteria	Proteobacteria	Gammaproteobacteria	Arenicellales	Arenicellaceae	HTCC5015	Genus: HTCC5015
87d17288b3369efa446d862891e3d6cc	73	VcPf2N	Unhealthy	Grotta_Vico	VC	White_Cave_Dweller	Cave	Ambient	P.ficiformis	No	Yes	PetrosiaVC	PF5	Bacteria	Proteobacteria	Alphaproteobacteria	Rhodobacterales	Rhodobacteraceae	Family: Rhodobacteraceae	Family: Rhodobacteraceae
8eb3f191bcf903c22a7c5fee787da6d7	72	VcPf2N	Unhealthy	Grotta_Vico	VC	White_Cave_Dweller	Cave	Ambient	P.ficiformis	No	Yes	PetrosiaVC	PF5	Bacteria	Planctomycetota	Planctomycetes	Pirellulales	Pirellulaceae	Bythopirellula	Genus: Bythopirellula
06e4201170fea37afe2d2f26d543809e	72	VcPf2N	Unhealthy	Grotta_Vico	VC	White_Cave_Dweller	Cave	Ambient	P.ficiformis	No	Yes	PetrosiaVC	PF5	Bacteria	Proteobacteria	Alphaproteobacteria	Rhizobiales	Devosiaceae	Family: Devosiaceae	Family: Devosiaceae
04d00fdeabf3a1d0863f2a1b5d31b778	71	VcPf2N	Unhealthy	Grotta_Vico	VC	White_Cave_Dweller	Cave	Ambient	P.ficiformis	No	Yes	PetrosiaVC	PF5	Bacteria	Proteobacteria	Alphaproteobacteria	Rhizobiales	Rhizobiaceae	Family: Rhizobiaceae	Family: Rhizobiaceae
d2c239018a5e3355b4e2737633240154	70	VcPf2N	Unhealthy	Grotta_Vico	VC	White_Cave_Dweller	Cave	Ambient	P.ficiformis	No	Yes	PetrosiaVC	PF5	Bacteria	Planctomycetota	OM190	OM190	OM190	OM190	Genus: OM190
fa2b855a8c1c0360d560e8eaf02faf33	70	VcPf2N	Unhealthy	Grotta_Vico	VC	White_Cave_Dweller	Cave	Ambient	P.ficiformis	No	Yes	PetrosiaVC	PF5	Bacteria	Proteobacteria	Alphaproteobacteria	Rhizobiales	Rhizobiaceae	Cohaesibacter	Genus: Cohaesibacter
a3f73e0c74f76ad13ac6ec7e0271299b	69	VcPf2N	Unhealthy	Grotta_Vico	VC	White_Cave_Dweller	Cave	Ambient	P.ficiformis	No	Yes	PetrosiaVC	PF5	Bacteria	Firmicutes	Clostridia	Oscillospirales	Hungateiclostridiaceae	Ruminiclostridium	Genus: Ruminiclostridium
7a54dad541f4044b5fd97b10d0ec3b34	69	VcPf2N	Unhealthy	Grotta_Vico	VC	White_Cave_Dweller	Cave	Ambient	P.ficiformis	No	Yes	PetrosiaVC	PF5	Bacteria	Proteobacteria	Alphaproteobacteria	Rhizobiales	Rhizobiaceae	Cohaesibacter	Cohaesibacter_sp.
0e36a8c6cf2470291a04285e7456b3c0	68	VcPf2N	Unhealthy	Grotta_Vico	VC	White_Cave_Dweller	Cave	Ambient	P.ficiformis	No	Yes	PetrosiaVC	PF5	Bacteria	Proteobacteria	Alphaproteobacteria	Rhodobacterales	Rhodobacteraceae	Family: Rhodobacteraceae	Family: Rhodobacteraceae
c3ca44aff5646ea360ea8c79d7d2f633	67	VcPf2N	Unhealthy	Grotta_Vico	VC	White_Cave_Dweller	Cave	Ambient	P.ficiformis	No	Yes	PetrosiaVC	PF5	Bacteria	Firmicutes	Bacilli	Izemoplasmatales	Izemoplasmataceae	Izimaplasma	Genus: Izimaplasma
eb14467a48ed07ce15e5fd6fbb4cb19b	67	VcPf2N	Unhealthy	Grotta_Vico	VC	White_Cave_Dweller	Cave	Ambient	P.ficiformis	No	Yes	PetrosiaVC	PF5	Bacteria	Myxococcota	Polyangia	Nannocystales	Nannocystaceae	Family: Nannocystaceae	Family: Nannocystaceae
6ff4131fe03403ed9d8c5b213b32e6b7	67	VcPf2N	Unhealthy	Grotta_Vico	VC	White_Cave_Dweller	Cave	Ambient	P.ficiformis	No	Yes	PetrosiaVC	PF5	Bacteria	Planctomycetota	Planctomycetes	Class: Planctomycetes	Class: Planctomycetes	Class: Planctomycetes	Class: Planctomycetes
7622a7d91c7a48fdf5eb889fdfb4feb9	67	VcPf2N	Unhealthy	Grotta_Vico	VC	White_Cave_Dweller	Cave	Ambient	P.ficiformis	No	Yes	PetrosiaVC	PF5	Bacteria	Planctomycetota	Phycisphaerae	CCM11a	CCM11a	CCM11a	Genus: CCM11a
15b503fbc207aecf4879f01321d81b7d	67	VcPf2N	Unhealthy	Grotta_Vico	VC	White_Cave_Dweller	Cave	Ambient	P.ficiformis	No	Yes	PetrosiaVC	PF5	Bacteria	Proteobacteria	Alphaproteobacteria	Parvibaculales	PS1_clade	PS1_clade	Genus: PS1_clade
17f68e3fac6daf9b235482fff5c8771a	67	VcPf2N	Unhealthy	Grotta_Vico	VC	White_Cave_Dweller	Cave	Ambient	P.ficiformis	No	Yes	PetrosiaVC	PF5	Bacteria	Proteobacteria	Gammaproteobacteria	Pseudomonadales	Saccharospirillaceae	Saccharospirillaceae	Genus: Saccharospirillaceae
23cb28d19691142302366caf7a563860	67	VcPf2N	Unhealthy	Grotta_Vico	VC	White_Cave_Dweller	Cave	Ambient	P.ficiformis	No	Yes	PetrosiaVC	PF5	Bacteria	Proteobacteria	Alphaproteobacteria	Rhodobacterales	Rhodobacteraceae	Family: Rhodobacteraceae	Family: Rhodobacteraceae
d8ffaae0b506990b12494098782bb5e0	67	VcPf2N	Unhealthy	Grotta_Vico	VC	White_Cave_Dweller	Cave	Ambient	P.ficiformis	No	Yes	PetrosiaVC	PF5	Bacteria	Proteobacteria	Alphaproteobacteria	Rhodobacterales	Rhodobacteraceae	Family: Rhodobacteraceae	Family: Rhodobacteraceae
23697879c3cd6eae2847cfeed2c812d3	66	VcPf2N	Unhealthy	Grotta_Vico	VC	White_Cave_Dweller	Cave	Ambient	P.ficiformis	No	Yes	PetrosiaVC	PF5	Bacteria	Planctomycetota	OM190	OM190	OM190	OM190	Genus: OM190
6bf5601bdafff531f67847fd2fbc7ee3	66	VcPf2N	Unhealthy	Grotta_Vico	VC	White_Cave_Dweller	Cave	Ambient	P.ficiformis	No	Yes	PetrosiaVC	PF5	Bacteria	Proteobacteria	Gammaproteobacteria	Burkholderiales	Burkholderiaceae	Limnobacter	Genus: Limnobacter
618c873d380b9141fa47c86a7474755c	65	VcPf2N	Unhealthy	Grotta_Vico	VC	White_Cave_Dweller	Cave	Ambient	P.ficiformis	No	Yes	PetrosiaVC	PF5	Bacteria	Bacteroidota	Bacteroidia	Flavobacteriales	Flavobacteriaceae	Family: Flavobacteriaceae	Family: Flavobacteriaceae
053da4deeb1e46c81a4731a986d2309e	65	VcPf2N	Unhealthy	Grotta_Vico	VC	White_Cave_Dweller	Cave	Ambient	P.ficiformis	No	Yes	PetrosiaVC	PF5	Bacteria	Planctomycetota	Planctomycetes	Pirellulales	Pirellulaceae	Pirellula	Genus: Pirellula
4ffe55272d052fc39bb03cc8c535f89e	65	VcPf2N	Unhealthy	Grotta_Vico	VC	White_Cave_Dweller	Cave	Ambient	P.ficiformis	No	Yes	PetrosiaVC	PF5	Bacteria	Planctomycetota	Phycisphaerae	Phycisphaerales	Phycisphaeraceae	SM1A02	Genus: SM1A02
d1a16bb7488e17613215e461434fb602	64	VcPf2N	Unhealthy	Grotta_Vico	VC	White_Cave_Dweller	Cave	Ambient	P.ficiformis	No	Yes	PetrosiaVC	PF5	Bacteria	Chloroflexi	Anaerolineae	SBR1031	A4b	A4b	Genus: A4b
89f3be31b5e9d79f330d4c235e99cc5f	64	VcPf2N	Unhealthy	Grotta_Vico	VC	White_Cave_Dweller	Cave	Ambient	P.ficiformis	No	Yes	PetrosiaVC	PF5	Bacteria	Desulfobacterota	Desulfobacteria	Desulfobacterales	Desulfobacteraceae	Desulfobacter	Genus: Desulfobacter
cc95c4917aef52aacd55cf51bd9e7d60	64	VcPf2N	Unhealthy	Grotta_Vico	VC	White_Cave_Dweller	Cave	Ambient	P.ficiformis	No	Yes	PetrosiaVC	PF5	Bacteria	WPS-2	WPS-2	WPS-2	WPS-2	WPS-2	Genus: WPS-2
ed78f6e62255aa0bb982292d89082bd7	63	VcPf2N	Unhealthy	Grotta_Vico	VC	White_Cave_Dweller	Cave	Ambient	P.ficiformis	No	Yes	PetrosiaVC	PF5	Bacteria	Armatimonadota	Fimbriimonadia	Fimbriimonadales	Fimbriimonadaceae	Fimbriimonadaceae	Genus: Fimbriimonadaceae
a6141154309990e50d34441474eca1de	63	VcPf2N	Unhealthy	Grotta_Vico	VC	White_Cave_Dweller	Cave	Ambient	P.ficiformis	No	Yes	PetrosiaVC	PF5	Bacteria	Desulfobacterota	Desulfobacteria	Desulfobacterales	Order: Desulfobacterales	Order: Desulfobacterales	Order: Desulfobacterales
5d47f357d7e21c75ae27eae867ff2524	63	VcPf2N	Unhealthy	Grotta_Vico	VC	White_Cave_Dweller	Cave	Ambient	P.ficiformis	No	Yes	PetrosiaVC	PF5	Bacteria	Proteobacteria	Alphaproteobacteria	Rhizobiales	Stappiaceae	Labrenzia	Genus: Labrenzia
db1bac2e7bdde609fdf4fd26532c5830	62	VcPf2N	Unhealthy	Grotta_Vico	VC	White_Cave_Dweller	Cave	Ambient	P.ficiformis	No	Yes	PetrosiaVC	PF5	Bacteria	Spirochaetota	Spirochaetia	Spirochaetales	Spirochaetaceae	Spirochaeta_2	Genus: Spirochaeta_2
6a06bca14c481386aee3fe05fd20be1f	61	VcPf2N	Unhealthy	Grotta_Vico	VC	White_Cave_Dweller	Cave	Ambient	P.ficiformis	No	Yes	PetrosiaVC	PF5	Bacteria	Myxococcota	Myxococcia	Myxococcales	Myxococcaceae	P3OB-42	Genus: P3OB-42
ea28eae646de7ea800cb064e481d0d8d	61	VcPf2N	Unhealthy	Grotta_Vico	VC	White_Cave_Dweller	Cave	Ambient	P.ficiformis	No	Yes	PetrosiaVC	PF5	Bacteria	Planctomycetota	Planctomycetes	Planctomycetales	Rubinisphaeraceae	Family: Rubinisphaeraceae	Family: Rubinisphaeraceae
7353cd66384fd37575a153b0847ba709	61	VcPf2N	Unhealthy	Grotta_Vico	VC	White_Cave_Dweller	Cave	Ambient	P.ficiformis	No	Yes	PetrosiaVC	PF5	Bacteria	Proteobacteria	Alphaproteobacteria	Rhodospirillales	Terasakiellaceae	Family: Terasakiellaceae	Family: Terasakiellaceae
4d7d5155d358724cd80f819504fc4278	60	VcPf2N	Unhealthy	Grotta_Vico	VC	White_Cave_Dweller	Cave	Ambient	P.ficiformis	No	Yes	PetrosiaVC	PF5	Bacteria	Planctomycetota	Planctomycetes	Planctomycetales	Gimesiaceae	Gimesia	Gimesia_maris
0f3da5986f702a9e149352890dd4cfe4	59	VcPf2N	Unhealthy	Grotta_Vico	VC	White_Cave_Dweller	Cave	Ambient	P.ficiformis	No	Yes	PetrosiaVC	PF5	Bacteria	Patescibacteria	ABY1	Candidatus_Falkowbacteria	Candidatus_Falkowbacteria	Candidatus_Falkowbacteria	Genus: Candidatus_Falkowbacteria
98934b930f25cbfe9895e500b15b0ed5	59	VcPf2N	Unhealthy	Grotta_Vico	VC	White_Cave_Dweller	Cave	Ambient	P.ficiformis	No	Yes	PetrosiaVC	PF5	Bacteria	Planctomycetota	Phycisphaerae	Phycisphaerales	Phycisphaeraceae	Urania-1B-19_sediment	Genus: Urania-1B-19_sediment
73a4bdae7e76528fc84795da3de5fea8	58	VcPf2N	Unhealthy	Grotta_Vico	VC	White_Cave_Dweller	Cave	Ambient	P.ficiformis	No	Yes	PetrosiaVC	PF5	Bacteria	Myxococcota	Polyangia	Nannocystales	Nannocystaceae	Family: Nannocystaceae	Family: Nannocystaceae
8adbbf2fd37d287c9c090e288b073cce	58	VcPf2N	Unhealthy	Grotta_Vico	VC	White_Cave_Dweller	Cave	Ambient	P.ficiformis	No	Yes	PetrosiaVC	PF5	Bacteria	Planctomycetota	Planctomycetes	Pirellulales	Pirellulaceae	Pirellula	Genus: Pirellula
736ae2884b9ac93d8f0064dde7e08831	58	VcPf2N	Unhealthy	Grotta_Vico	VC	White_Cave_Dweller	Cave	Ambient	P.ficiformis	No	Yes	PetrosiaVC	PF5	Bacteria	Proteobacteria	Alphaproteobacteria	Rhizobiales	Stappiaceae	Labrenzia	Genus: Labrenzia
26e8f4a3c2849d4ae1f0f238f545b87b	57	VcPf2N	Unhealthy	Grotta_Vico	VC	White_Cave_Dweller	Cave	Ambient	P.ficiformis	No	Yes	PetrosiaVC	PF5	Bacteria	Proteobacteria	Alphaproteobacteria	Rhodobacterales	Rhodobacteraceae	Ruegeria	Genus: Ruegeria
672caf92a0d60c3244ae230c8fb69312	57	VcPf2N	Unhealthy	Grotta_Vico	VC	White_Cave_Dweller	Cave	Ambient	P.ficiformis	No	Yes	PetrosiaVC	PF5	Bacteria	Proteobacteria	Alphaproteobacteria	Parvibaculales	PS1_clade	PS1_clade	Genus: PS1_clade
6746c3aaf747b3a23bc0ef8d402d0b37	57	VcPf2N	Unhealthy	Grotta_Vico	VC	White_Cave_Dweller	Cave	Ambient	P.ficiformis	No	Yes	PetrosiaVC	PF5	Bacteria	Proteobacteria	Alphaproteobacteria	Rhizobiales	Stappiaceae	Labrenzia	Genus: Labrenzia
a40d77484c7e9da046f15250565382fc	57	VcPf2N	Unhealthy	Grotta_Vico	VC	White_Cave_Dweller	Cave	Ambient	P.ficiformis	No	Yes	PetrosiaVC	PF5	Bacteria	Proteobacteria	Alphaproteobacteria	Rhodobacterales	Rhodobacteraceae	Nautella	Genus: Nautella
dcfe7d83883c9105072ba5cfca2fdcfc	57	VcPf2N	Unhealthy	Grotta_Vico	VC	White_Cave_Dweller	Cave	Ambient	P.ficiformis	No	Yes	PetrosiaVC	PF5	Bacteria	Spirochaetota	Spirochaetia	Spirochaetales	Spirochaetaceae	Sediminispirochaeta	Genus: Sediminispirochaeta
5edfca963f0f1338086b0a8b060f32a5	56	VcPf2N	Unhealthy	Grotta_Vico	VC	White_Cave_Dweller	Cave	Ambient	P.ficiformis	No	Yes	PetrosiaVC	PF5	Bacteria	Planctomycetota	Planctomycetes	Planctomycetales	Rubinisphaeraceae	Fuerstia	Genus: Fuerstia
3da44a23885e65f34b59d96578190e54	55	VcPf2N	Unhealthy	Grotta_Vico	VC	White_Cave_Dweller	Cave	Ambient	P.ficiformis	No	Yes	PetrosiaVC	PF5	Bacteria	Bacteroidota	Bacteroidia	Sphingobacteriales	NS11-12_group	NS11-12_group	Genus: NS11-12_group
60805ec8f40d411b1e5233fe8c2e3433	55	VcPf2N	Unhealthy	Grotta_Vico	VC	White_Cave_Dweller	Cave	Ambient	P.ficiformis	No	Yes	PetrosiaVC	PF5	Bacteria	Hydrogenedentes	Hydrogenedentia	Hydrogenedentiales	Hydrogenedensaceae	Hydrogenedensaceae	Genus: Hydrogenedensaceae
c87cc3aabff05c2ff61637fce1888ee5	55	VcPf2N	Unhealthy	Grotta_Vico	VC	White_Cave_Dweller	Cave	Ambient	P.ficiformis	No	Yes	PetrosiaVC	PF5	Bacteria	Myxococcota	Polyangia	Haliangiales	Haliangiaceae	Haliangium	Genus: Haliangium
8ad9a0fb4f6ba34822004a3378c732cf	55	VcPf2N	Unhealthy	Grotta_Vico	VC	White_Cave_Dweller	Cave	Ambient	P.ficiformis	No	Yes	PetrosiaVC	PF5	Bacteria	Proteobacteria	Alphaproteobacteria	Kordiimonadales	Order: Kordiimonadales	Order: Kordiimonadales	Order: Kordiimonadales
c3c001190a492a9a39dc1f873793f975	54	VcPf2N	Unhealthy	Grotta_Vico	VC	White_Cave_Dweller	Cave	Ambient	P.ficiformis	No	Yes	PetrosiaVC	PF5	Bacteria	Proteobacteria	Gammaproteobacteria	Ga0077536	Ga0077536	Ga0077536	Genus: Ga0077536
5645fb57183826acd3c597b2d1339874	53	VcPf2N	Unhealthy	Grotta_Vico	VC	White_Cave_Dweller	Cave	Ambient	P.ficiformis	No	Yes	PetrosiaVC	PF5	Bacteria	Planctomycetota	Phycisphaerae	Phycisphaerales	Phycisphaeraceae	Family: Phycisphaeraceae	Family: Phycisphaeraceae
e40ce4a0ea37b09f977e6cb14c93f226	53	VcPf2N	Unhealthy	Grotta_Vico	VC	White_Cave_Dweller	Cave	Ambient	P.ficiformis	No	Yes	PetrosiaVC	PF5	Bacteria	Proteobacteria	Alphaproteobacteria	Sneathiellales	Sneathiellaceae	Sneathiella	Genus: Sneathiella
f266d72d5a290d969c79897923dd2730	52	VcPf2N	Unhealthy	Grotta_Vico	VC	White_Cave_Dweller	Cave	Ambient	P.ficiformis	No	Yes	PetrosiaVC	PF5	Bacteria	Desulfobacterota	Desulfobacteria	Desulfobacterales	Desulfosarcinaceae	Desulfatibacillum	Genus: Desulfatibacillum
18613490c6b422a7fe47446febb65dae	52	VcPf2N	Unhealthy	Grotta_Vico	VC	White_Cave_Dweller	Cave	Ambient	P.ficiformis	No	Yes	PetrosiaVC	PF5	Bacteria	Firmicutes	Clostridia	Lachnospirales	Lachnospiraceae	Vallitalea	Genus: Vallitalea
ddd8a1baef3a2a44b128f6e088cc27c4	51	VcPf2N	Unhealthy	Grotta_Vico	VC	White_Cave_Dweller	Cave	Ambient	P.ficiformis	No	Yes	PetrosiaVC	PF5	Bacteria	Actinobacteriota	Acidimicrobiia	Microtrichales	Microtrichaceae	Sva0996_group	Genus: Sva0996_group
27ab0074d85c6611abf2bdea2fba8e1d	51	VcPf2N	Unhealthy	Grotta_Vico	VC	White_Cave_Dweller	Cave	Ambient	P.ficiformis	No	Yes	PetrosiaVC	PF5	Bacteria	Planctomycetota	OM190	OM190	OM190	OM190	Genus: OM190
59e1598984b70bff32b89505d111e730	51	VcPf2N	Unhealthy	Grotta_Vico	VC	White_Cave_Dweller	Cave	Ambient	P.ficiformis	No	Yes	PetrosiaVC	PF5	Bacteria	Proteobacteria	Alphaproteobacteria	Puniceispirillales	Order: Puniceispirillales	Order: Puniceispirillales	Order: Puniceispirillales
a5ad59c8c463d4c266d8285bb6e69fe8	51	VcPf2N	Unhealthy	Grotta_Vico	VC	White_Cave_Dweller	Cave	Ambient	P.ficiformis	No	Yes	PetrosiaVC	PF5	Bacteria	Proteobacteria	Alphaproteobacteria	Rhizobiales	Rhizobiaceae	Family: Rhizobiaceae	Family: Rhizobiaceae
0577d3be62044d71a9967e318b3eebb0	50	VcPf2N	Unhealthy	Grotta_Vico	VC	White_Cave_Dweller	Cave	Ambient	P.ficiformis	No	Yes	PetrosiaVC	PF5	Bacteria	Acidobacteriota	Thermoanaerobaculia	Thermoanaerobaculales	Thermoanaerobaculaceae	Sub10	Holophaga_sp.
62ef5ee9c196af5e39dd5710e13d2bec	50	VcPf2N	Unhealthy	Grotta_Vico	VC	White_Cave_Dweller	Cave	Ambient	P.ficiformis	No	Yes	PetrosiaVC	PF5	Bacteria	Firmicutes	Clostridia	Oscillospirales	Hungateiclostridiaceae	Family: Hungateiclostridiaceae	Family: Hungateiclostridiaceae
7bdf9fc6519122fb18ce1f0d0899071b	50	VcPf2N	Unhealthy	Grotta_Vico	VC	White_Cave_Dweller	Cave	Ambient	P.ficiformis	No	Yes	PetrosiaVC	PF5	Bacteria	Planctomycetota	Phycisphaerae	CCM11a	CCM11a	CCM11a	Genus: CCM11a
9f9205a6a5b3e13665ef54cbdfd2a417	50	VcPf2N	Unhealthy	Grotta_Vico	VC	White_Cave_Dweller	Cave	Ambient	P.ficiformis	No	Yes	PetrosiaVC	PF5	Bacteria	Proteobacteria	Alphaproteobacteria	Micavibrionales	Micavibrionaceae	Family: Micavibrionaceae	Family: Micavibrionaceae
6cd15f1d65ad7371c9301ace7a349050	49	VcPf2N	Unhealthy	Grotta_Vico	VC	White_Cave_Dweller	Cave	Ambient	P.ficiformis	No	Yes	PetrosiaVC	PF5	Archaea	Nanoarchaeota	Nanoarchaeia	Woesearchaeales	Woesearchaeales	Woesearchaeales	Genus: Woesearchaeales
ffa0f12eea7fa0cc0d5b117a40cf0561	48	VcPf2N	Unhealthy	Grotta_Vico	VC	White_Cave_Dweller	Cave	Ambient	P.ficiformis	No	Yes	PetrosiaVC	PF5	Bacteria	Bacteroidota	Bacteroidia	Chitinophagales	Saprospiraceae	Phaeodactylibacter	Genus: Phaeodactylibacter
6ab1278e6d3276c1b26504067bd48865	48	VcPf2N	Unhealthy	Grotta_Vico	VC	White_Cave_Dweller	Cave	Ambient	P.ficiformis	No	Yes	PetrosiaVC	PF5	Bacteria	Proteobacteria	Alphaproteobacteria	Kordiimonadales	Order: Kordiimonadales	Order: Kordiimonadales	Order: Kordiimonadales
fae5cd4c8af0d15b5fd21f4325650071	48	VcPf2N	Unhealthy	Grotta_Vico	VC	White_Cave_Dweller	Cave	Ambient	P.ficiformis	No	Yes	PetrosiaVC	PF5	Bacteria	Proteobacteria	Alphaproteobacteria	Rhizobiales	Rhizobiaceae	Cohaesibacter	Genus: Cohaesibacter
de4a5caa96eb0d730afbcbbd54800182	48	VcPf2N	Unhealthy	Grotta_Vico	VC	White_Cave_Dweller	Cave	Ambient	P.ficiformis	No	Yes	PetrosiaVC	PF5	Bacteria	SAR324_clade(B)	SAR324_clade(B)	SAR324_clade(B)	SAR324_clade(B)	SAR324_clade(B)	Genus: SAR324_clade(B)
54e1f936f4ca95f295b290a99dc42ee7	47	VcPf2N	Unhealthy	Grotta_Vico	VC	White_Cave_Dweller	Cave	Ambient	P.ficiformis	No	Yes	PetrosiaVC	PF5	Bacteria	Bacteroidota	Bacteroidia	Bacteroidales	Order: Bacteroidales	Order: Bacteroidales	Order: Bacteroidales
ff4d80ad91520ee693bf493eae2d3680	47	VcPf2N	Unhealthy	Grotta_Vico	VC	White_Cave_Dweller	Cave	Ambient	P.ficiformis	No	Yes	PetrosiaVC	PF5	Bacteria	Bacteroidota	Bacteroidia	Cytophagales	Cyclobacteriaceae	Family: Cyclobacteriaceae	Family: Cyclobacteriaceae
dadcc7cece08759d706c1227efcef12f	47	VcPf2N	Unhealthy	Grotta_Vico	VC	White_Cave_Dweller	Cave	Ambient	P.ficiformis	No	Yes	PetrosiaVC	PF5	Bacteria	Proteobacteria	Alphaproteobacteria	Micavibrionales	Micavibrionaceae	Family: Micavibrionaceae	Family: Micavibrionaceae
c3c33bf8045957c82378ffd19fd59036	46	VcPf2N	Unhealthy	Grotta_Vico	VC	White_Cave_Dweller	Cave	Ambient	P.ficiformis	No	Yes	PetrosiaVC	PF5	Bacteria	Bdellovibrionota	Bdellovibrionia	Bdellovibrionales	Bdellovibrionaceae	Bdellovibrio	Genus: Bdellovibrio
c8e3b4a14285163f4ab631808532205f	46	VcPf2N	Unhealthy	Grotta_Vico	VC	White_Cave_Dweller	Cave	Ambient	P.ficiformis	No	Yes	PetrosiaVC	PF5	Bacteria	Desulfobacterota	Desulfuromonadia	Bradymonadales	Bradymonadales	Bradymonadales	Genus: Bradymonadales
729dfaa7c95475081e3392be08c8190a	46	VcPf2N	Unhealthy	Grotta_Vico	VC	White_Cave_Dweller	Cave	Ambient	P.ficiformis	No	Yes	PetrosiaVC	PF5	Bacteria	Planctomycetota	Planctomycetes	Pirellulales	Pirellulaceae	Pir4_lineage	Genus: Pir4_lineage
34fb1cd79275964d4b4a4696119cfea9	46	VcPf2N	Unhealthy	Grotta_Vico	VC	White_Cave_Dweller	Cave	Ambient	P.ficiformis	No	Yes	PetrosiaVC	PF5	Bacteria	Proteobacteria	Alphaproteobacteria	Rhodobacterales	Rhodobacteraceae	Pseudophaeobacter	Genus: Pseudophaeobacter
7c943a274d2b53837319a3da6909f5fb	46	VcPf2N	Unhealthy	Grotta_Vico	VC	White_Cave_Dweller	Cave	Ambient	P.ficiformis	No	Yes	PetrosiaVC	PF5	Bacteria	Proteobacteria	Gammaproteobacteria	Pseudomonadales	Nitrincolaceae	Family: Nitrincolaceae	Family: Nitrincolaceae
e066560ab9d21cee5979302ba741aeba	46	VcPf2N	Unhealthy	Grotta_Vico	VC	White_Cave_Dweller	Cave	Ambient	P.ficiformis	No	Yes	PetrosiaVC	PF5	Bacteria	Proteobacteria	Alphaproteobacteria	Caulobacterales	Hyphomonadaceae	Maricaulis	Genus: Maricaulis
62846f3009095a68c41110699d86c159	45	VcPf2N	Unhealthy	Grotta_Vico	VC	White_Cave_Dweller	Cave	Ambient	P.ficiformis	No	Yes	PetrosiaVC	PF5	Bacteria	Planctomycetota	Phycisphaerae	Phycisphaerales	Phycisphaeraceae	Family: Phycisphaeraceae	Family: Phycisphaeraceae
c1de29b83786da9c1cf93ec9f574553f	45	VcPf2N	Unhealthy	Grotta_Vico	VC	White_Cave_Dweller	Cave	Ambient	P.ficiformis	No	Yes	PetrosiaVC	PF5	Bacteria	Planctomycetota	Phycisphaerae	Phycisphaerales	Phycisphaeraceae	SM1A02	Genus: SM1A02
4200f4216de08fe1eb8d85f0202273a4	45	VcPf2N	Unhealthy	Grotta_Vico	VC	White_Cave_Dweller	Cave	Ambient	P.ficiformis	No	Yes	PetrosiaVC	PF5	Bacteria	Proteobacteria	Gammaproteobacteria	Class: Gammaproteobacteria	Class: Gammaproteobacteria	Class: Gammaproteobacteria	Class: Gammaproteobacteria
5456eacf7c22325111d7397ff7160e7c	44	VcPf2N	Unhealthy	Grotta_Vico	VC	White_Cave_Dweller	Cave	Ambient	P.ficiformis	No	Yes	PetrosiaVC	PF5	Bacteria	Firmicutes	Clostridia	Peptostreptococcales-Tissierellales	Dethiosulfatibacteraceae	Dethiosulfatibacter	Genus: Dethiosulfatibacter
5600a3e6759daae68466f438389ec894	44	VcPf2N	Unhealthy	Grotta_Vico	VC	White_Cave_Dweller	Cave	Ambient	P.ficiformis	No	Yes	PetrosiaVC	PF5	Bacteria	Planctomycetota	Planctomycetes	Pirellulales	Pirellulaceae	Blastopirellula	Genus: Blastopirellula
b2e6ca4ac01fb59ed0625929184ab207	44	VcPf2N	Unhealthy	Grotta_Vico	VC	White_Cave_Dweller	Cave	Ambient	P.ficiformis	No	Yes	PetrosiaVC	PF5	Bacteria	Proteobacteria	Gammaproteobacteria	Chromatiales	Sedimenticolaceae	Family: Sedimenticolaceae	Family: Sedimenticolaceae
b43a4ddbb78176c9d75dea45470902e4	44	VcPf2N	Unhealthy	Grotta_Vico	VC	White_Cave_Dweller	Cave	Ambient	P.ficiformis	No	Yes	PetrosiaVC	PF5	Bacteria	Proteobacteria	Gammaproteobacteria	Chromatiales	Sedimenticolaceae	Family: Sedimenticolaceae	Family: Sedimenticolaceae
754b0d9ab8de27bbe18f416795960201	43	VcPf2N	Unhealthy	Grotta_Vico	VC	White_Cave_Dweller	Cave	Ambient	P.ficiformis	No	Yes	PetrosiaVC	PF5	Bacteria	Bacteroidota	Bacteroidia	Flavobacteriales	Crocinitomicaceae	Fluviicola	Genus: Fluviicola
fe3ec11fdcb4169454cffdc75975df54	43	VcPf2N	Unhealthy	Grotta_Vico	VC	White_Cave_Dweller	Cave	Ambient	P.ficiformis	No	Yes	PetrosiaVC	PF5	Bacteria	Firmicutes	Clostridia	Peptostreptococcales-Tissierellales	Anaerovoracaceae	Family: Anaerovoracaceae	Family: Anaerovoracaceae
89fc3e78f5e831e76a9066f880ba3c68	43	VcPf2N	Unhealthy	Grotta_Vico	VC	White_Cave_Dweller	Cave	Ambient	P.ficiformis	No	Yes	PetrosiaVC	PF5	Bacteria	Proteobacteria	Alphaproteobacteria	Rickettsiales	SM2D12	SM2D12	Genus: SM2D12
f79befb579d3c23dbf0dc58a2fcfa505	43	VcPf2N	Unhealthy	Grotta_Vico	VC	White_Cave_Dweller	Cave	Ambient	P.ficiformis	No	Yes	PetrosiaVC	PF5	Bacteria	Proteobacteria	Alphaproteobacteria	Rhizobiales	Devosiaceae	Maritalea	Genus: Maritalea
70dbcfcf20cef756dcd55c9bd968bab1	42	VcPf2N	Unhealthy	Grotta_Vico	VC	White_Cave_Dweller	Cave	Ambient	P.ficiformis	No	Yes	PetrosiaVC	PF5	Bacteria	Bacteroidota	Bacteroidia	Flavobacteriales	NS9_group	NS9_group	Genus: NS9_group
b174d12d28d2e34cb84dbe04c58adcaf	42	VcPf2N	Unhealthy	Grotta_Vico	VC	White_Cave_Dweller	Cave	Ambient	P.ficiformis	No	Yes	PetrosiaVC	PF5	Bacteria	Desulfobacterota	Desulfovibrionia	Desulfovibrionales	Desulfovibrionaceae	Desulfovibrio	Genus: Desulfovibrio
68cadf89592579c921e7cb81cfca40e5	42	VcPf2N	Unhealthy	Grotta_Vico	VC	White_Cave_Dweller	Cave	Ambient	P.ficiformis	No	Yes	PetrosiaVC	PF5	Bacteria	Firmicutes	Clostridia	Oscillospirales	Hungateiclostridiaceae	Ruminiclostridium	Genus: Ruminiclostridium
531d92d1e7fe45ca2e69c5093cb90ed5	42	VcPf2N	Unhealthy	Grotta_Vico	VC	White_Cave_Dweller	Cave	Ambient	P.ficiformis	No	Yes	PetrosiaVC	PF5	Bacteria	Planctomycetota	Planctomycetes	Pirellulales	Pirellulaceae	Pir4_lineage	Genus: Pir4_lineage
7e0e395bd6748e660c592f63d0e88f70	41	VcPf2N	Unhealthy	Grotta_Vico	VC	White_Cave_Dweller	Cave	Ambient	P.ficiformis	No	Yes	PetrosiaVC	PF5	Bacteria	Firmicutes	Clostridia	Clostridia_vadinBB60	Clostridia_vadinBB60	Clostridia_vadinBB60	Genus: Clostridia_vadinBB60
3db7d007d32b6642f898ca01e5e257a3	41	VcPf2N	Unhealthy	Grotta_Vico	VC	White_Cave_Dweller	Cave	Ambient	P.ficiformis	No	Yes	PetrosiaVC	PF5	Bacteria	Planctomycetota	Phycisphaerae	MSBL9	SM23-30	SM23-30	Genus: SM23-30
dd9b3883ec66d5181421f31e3ce7b882	41	VcPf2N	Unhealthy	Grotta_Vico	VC	White_Cave_Dweller	Cave	Ambient	P.ficiformis	No	Yes	PetrosiaVC	PF5	Bacteria	Planctomycetota	Phycisphaerae	Phycisphaerales	Phycisphaeraceae	SM1A02	Genus: SM1A02
0bdc57d4e353d9a230b9e95e8834d9d6	41	VcPf2N	Unhealthy	Grotta_Vico	VC	White_Cave_Dweller	Cave	Ambient	P.ficiformis	No	Yes	PetrosiaVC	PF5	Bacteria	Proteobacteria	Alphaproteobacteria	Kordiimonadales	Order: Kordiimonadales	Order: Kordiimonadales	Order: Kordiimonadales
4b92e13ce3d7f055bc6eae3ec417921b	41	VcPf2N	Unhealthy	Grotta_Vico	VC	White_Cave_Dweller	Cave	Ambient	P.ficiformis	No	Yes	PetrosiaVC	PF5	Bacteria	WPS-2	WPS-2	WPS-2	WPS-2	WPS-2	Genus: WPS-2
b946418b81d413ab0c04677706039f85	41	VcPf2N	Unhealthy	Grotta_Vico	VC	White_Cave_Dweller	Cave	Ambient	P.ficiformis	No	Yes	PetrosiaVC	PF5	Bacteria	WPS-2	WPS-2	WPS-2	WPS-2	WPS-2	Genus: WPS-2
dd64f6542c6653b7cc60d6609c78904a	40	VcPf2N	Unhealthy	Grotta_Vico	VC	White_Cave_Dweller	Cave	Ambient	P.ficiformis	No	Yes	PetrosiaVC	PF5	Bacteria	Planctomycetota	Phycisphaerae	Phycisphaerales	Phycisphaeraceae	JL-ETNP-F27	Genus: JL-ETNP-F27
d6ea3d109c2b31921a6575c35ef67be3	40	VcPf2N	Unhealthy	Grotta_Vico	VC	White_Cave_Dweller	Cave	Ambient	P.ficiformis	No	Yes	PetrosiaVC	PF5	Bacteria	Proteobacteria	Gammaproteobacteria	Gammaproteobacteria_Incertae_Sedis	Order: Gammaproteobacteria_Incertae_Sedis	Order: Gammaproteobacteria_Incertae_Sedis	Order: Gammaproteobacteria_Incertae_Sedis
b29b3218410a973abebf3b935a541bb7	39	VcPf2N	Unhealthy	Grotta_Vico	VC	White_Cave_Dweller	Cave	Ambient	P.ficiformis	No	Yes	PetrosiaVC	PF5	Bacteria	Desulfobacterota	Desulfobacteria	Desulfobacterales	Desulfolunaceae	Family: Desulfolunaceae	Family: Desulfolunaceae
2e631c3bd036194719befb0484811861	39	VcPf2N	Unhealthy	Grotta_Vico	VC	White_Cave_Dweller	Cave	Ambient	P.ficiformis	No	Yes	PetrosiaVC	PF5	Bacteria	Planctomycetota	Planctomycetes	Pirellulales	Pirellulaceae	Blastopirellula	Genus: Blastopirellula
3d2fa994cabeca553e88ddb89640ec11	39	VcPf2N	Unhealthy	Grotta_Vico	VC	White_Cave_Dweller	Cave	Ambient	P.ficiformis	No	Yes	PetrosiaVC	PF5	Bacteria	Verrucomicrobiota	Lentisphaeria	P.palmC41	P.palmC41	P.palmC41	Genus: P.palmC41
986be96872d4fc428783c3971a918a9f	37	VcPf2N	Unhealthy	Grotta_Vico	VC	White_Cave_Dweller	Cave	Ambient	P.ficiformis	No	Yes	PetrosiaVC	PF5	Bacteria	Bacteroidota	Bacteroidia	Chitinophagales	Saprospiraceae	Family: Saprospiraceae	Family: Saprospiraceae
b580704d6e344db25e3ae3dc0cdff1fd	37	VcPf2N	Unhealthy	Grotta_Vico	VC	White_Cave_Dweller	Cave	Ambient	P.ficiformis	No	Yes	PetrosiaVC	PF5	Bacteria	Bacteroidota	Bacteroidia	Flavobacteriales	Cryomorphaceae	Family: Cryomorphaceae	Family: Cryomorphaceae
7e5a35efb3c3e3e17e0d028a1231abfc	37	VcPf2N	Unhealthy	Grotta_Vico	VC	White_Cave_Dweller	Cave	Ambient	P.ficiformis	No	Yes	PetrosiaVC	PF5	Bacteria	Firmicutes	Clostridia	Peptostreptococcales-Tissierellales	Peptostreptococcales-Tissierellales	Family: Peptostreptococcales-Tissierellales	Family: Peptostreptococcales-Tissierellales
ecf360df0b9c64b5f017b9b0f8255366	37	VcPf2N	Unhealthy	Grotta_Vico	VC	White_Cave_Dweller	Cave	Ambient	P.ficiformis	No	Yes	PetrosiaVC	PF5	Bacteria	Planctomycetota	Planctomycetes	Pirellulales	Pirellulaceae	Rhodopirellula	Genus: Rhodopirellula
02ef0c3b98dec5d73971c09742dbc9ae	37	VcPf2N	Unhealthy	Grotta_Vico	VC	White_Cave_Dweller	Cave	Ambient	P.ficiformis	No	Yes	PetrosiaVC	PF5	Bacteria	Proteobacteria	Alphaproteobacteria	Class: Alphaproteobacteria	Class: Alphaproteobacteria	Class: Alphaproteobacteria	Class: Alphaproteobacteria
0dabe4d6b4d7e0fe390876196a81f7c9	37	VcPf2N	Unhealthy	Grotta_Vico	VC	White_Cave_Dweller	Cave	Ambient	P.ficiformis	No	Yes	PetrosiaVC	PF5	Bacteria	Proteobacteria	Gammaproteobacteria	Gammaproteobacteria_Incertae_Sedis	Order: Gammaproteobacteria_Incertae_Sedis	Order: Gammaproteobacteria_Incertae_Sedis	Order: Gammaproteobacteria_Incertae_Sedis
8a23c5998e6302af12faa67bc74e7ea5	37	VcPf2N	Unhealthy	Grotta_Vico	VC	White_Cave_Dweller	Cave	Ambient	P.ficiformis	No	Yes	PetrosiaVC	PF5	Bacteria	Proteobacteria	Gammaproteobacteria	Ectothiorhodospirales	Ectothiorhodospiraceae	Family: Ectothiorhodospiraceae	Family: Ectothiorhodospiraceae
99b762343357c977f8d110c75d13a21d	37	VcPf2N	Unhealthy	Grotta_Vico	VC	White_Cave_Dweller	Cave	Ambient	P.ficiformis	No	Yes	PetrosiaVC	PF5	Bacteria	Proteobacteria	Gammaproteobacteria	Pseudomonadales	Spongiibacteraceae	BD1-7_clade	Genus: BD1-7_clade
91179552a56f41f26833393f306f8c35	36	VcPf2N	Unhealthy	Grotta_Vico	VC	White_Cave_Dweller	Cave	Ambient	P.ficiformis	No	Yes	PetrosiaVC	PF5	Bacteria	Bacteroidota	Kapabacteria	Kapabacteriales	Kapabacteriales	Kapabacteriales	Genus: Kapabacteriales
d701902f24611d1b7c1867ebe1ea2b8e	36	VcPf2N	Unhealthy	Grotta_Vico	VC	White_Cave_Dweller	Cave	Ambient	P.ficiformis	No	Yes	PetrosiaVC	PF5	Bacteria	Bacteroidota	Bacteroidia	Cytophagales	Cyclobacteriaceae	Reichenbachiella	Genus: Reichenbachiella
528b1349e05a829f03d7f448199fcd8d	36	VcPf2N	Unhealthy	Grotta_Vico	VC	White_Cave_Dweller	Cave	Ambient	P.ficiformis	No	Yes	PetrosiaVC	PF5	Bacteria	Bdellovibrionota	Bdellovibrionia	Bdellovibrionales	Bdellovibrionaceae	Bdellovibrio	Genus: Bdellovibrio
21af4ef9e9a6902cd603edd532205f89	36	VcPf2N	Unhealthy	Grotta_Vico	VC	White_Cave_Dweller	Cave	Ambient	P.ficiformis	No	Yes	PetrosiaVC	PF5	Bacteria	Proteobacteria	Alphaproteobacteria	Rhizobiales	Methyloligellaceae	Family: Methyloligellaceae	Family: Methyloligellaceae
68b2b365e666ed771904a31e3ff3ad43	36	VcPf2N	Unhealthy	Grotta_Vico	VC	White_Cave_Dweller	Cave	Ambient	P.ficiformis	No	Yes	PetrosiaVC	PF5	Bacteria	Proteobacteria	Alphaproteobacteria	Micavibrionales	Micavibrionaceae	Family: Micavibrionaceae	Family: Micavibrionaceae
6aacea0b87050f642facf64283354b86	35	VcPf2N	Unhealthy	Grotta_Vico	VC	White_Cave_Dweller	Cave	Ambient	P.ficiformis	No	Yes	PetrosiaVC	PF5	Bacteria	Planctomycetota	Phycisphaerae	Phycisphaerales	Phycisphaeraceae	SM1A02	Genus: SM1A02
a1e5c7d9fc8f3444a87c9ee9d7080f90	35	VcPf2N	Unhealthy	Grotta_Vico	VC	White_Cave_Dweller	Cave	Ambient	P.ficiformis	No	Yes	PetrosiaVC	PF5	Bacteria	Proteobacteria	Gammaproteobacteria	Steroidobacterales	Woeseiaceae	Woeseia	Genus: Woeseia
e8b317d3492f091896861977712d86b5	35	VcPf2N	Unhealthy	Grotta_Vico	VC	White_Cave_Dweller	Cave	Ambient	P.ficiformis	No	Yes	PetrosiaVC	PF5	Bacteria	Proteobacteria	Alphaproteobacteria	Micavibrionales	Micavibrionaceae	Family: Micavibrionaceae	Family: Micavibrionaceae
ef01959d774bb43d69df31d17e6ba823	35	VcPf2N	Unhealthy	Grotta_Vico	VC	White_Cave_Dweller	Cave	Ambient	P.ficiformis	No	Yes	PetrosiaVC	PF5	Bacteria	Proteobacteria	Alphaproteobacteria	Rhizobiales	Rhizobiaceae	Cohaesibacter	Genus: Cohaesibacter
248f7ccffc90080522bd9ba4f2613a58	35	VcPf2N	Unhealthy	Grotta_Vico	VC	White_Cave_Dweller	Cave	Ambient	P.ficiformis	No	Yes	PetrosiaVC	PF5	Bacteria	Verrucomicrobiota	Verrucomicrobiae	Opitutales	Opitutaceae	Diplosphaera	Genus: Diplosphaera
97c55f9b64b1030464388d09483411e9	34	VcPf2N	Unhealthy	Grotta_Vico	VC	White_Cave_Dweller	Cave	Ambient	P.ficiformis	No	Yes	PetrosiaVC	PF5	Bacteria	Proteobacteria	Alphaproteobacteria	Rhodobacterales	Rhodobacteraceae	Family: Rhodobacteraceae	Family: Rhodobacteraceae
3d7706561c317d16ac5c8bba2f9ef4ec	33	VcPf2N	Unhealthy	Grotta_Vico	VC	White_Cave_Dweller	Cave	Ambient	P.ficiformis	No	Yes	PetrosiaVC	PF5	Bacteria	Planctomycetota	Phycisphaerae	Phycisphaerales	Phycisphaeraceae	Urania-1B-19_sediment	Genus: Urania-1B-19_sediment
96efef0656407053396a2e23c549837e	33	VcPf2N	Unhealthy	Grotta_Vico	VC	White_Cave_Dweller	Cave	Ambient	P.ficiformis	No	Yes	PetrosiaVC	PF5	Bacteria	Planctomycetota	Phycisphaerae	Phycisphaerales	Phycisphaeraceae	SM1A02	Genus: SM1A02
bab865cb08b43c650cb4d1ed2e4c5835	33	VcPf2N	Unhealthy	Grotta_Vico	VC	White_Cave_Dweller	Cave	Ambient	P.ficiformis	No	Yes	PetrosiaVC	PF5	Bacteria	Planctomycetota	Phycisphaerae	Phycisphaerales	Phycisphaeraceae	SM1A02	Genus: SM1A02
db62a63624cfc9d0a5054764163fb4cc	33	VcPf2N	Unhealthy	Grotta_Vico	VC	White_Cave_Dweller	Cave	Ambient	P.ficiformis	No	Yes	PetrosiaVC	PF5	Bacteria	Planctomycetota	Planctomycetes	Planctomycetales	Gimesiaceae	Family: Gimesiaceae	Family: Gimesiaceae
b263de74eb4998585c38a586666477c3	33	VcPf2N	Unhealthy	Grotta_Vico	VC	White_Cave_Dweller	Cave	Ambient	P.ficiformis	No	Yes	PetrosiaVC	PF5	Bacteria	Proteobacteria	Gammaproteobacteria	Class: Gammaproteobacteria	Class: Gammaproteobacteria	Class: Gammaproteobacteria	Class: Gammaproteobacteria
fc29160cbbcb0910037a36bc6125a7da	32	VcPf2N	Unhealthy	Grotta_Vico	VC	White_Cave_Dweller	Cave	Ambient	P.ficiformis	No	Yes	PetrosiaVC	PF5	Bacteria	Bacteroidota	Bacteroidia	Bacteroidales	Marinilabiliaceae	Carboxylicivirga	Genus: Carboxylicivirga
e4e21d30fa24b806e597773a0122beca	32	VcPf2N	Unhealthy	Grotta_Vico	VC	White_Cave_Dweller	Cave	Ambient	P.ficiformis	No	Yes	PetrosiaVC	PF5	Bacteria	Chloroflexi	Anaerolineae	SBR1031	SBR1031	SBR1031	Genus: SBR1031
75e344d30899b8b159c5fd5b95def41b	32	VcPf2N	Unhealthy	Grotta_Vico	VC	White_Cave_Dweller	Cave	Ambient	P.ficiformis	No	Yes	PetrosiaVC	PF5	Bacteria	Firmicutes	Clostridia	Class: Clostridia	Class: Clostridia	Class: Clostridia	Class: Clostridia
518c5b00c59592ef3790a6a9b245ea65	32	VcPf2N	Unhealthy	Grotta_Vico	VC	White_Cave_Dweller	Cave	Ambient	P.ficiformis	No	Yes	PetrosiaVC	PF5	Bacteria	Proteobacteria	Alphaproteobacteria	Rhodobacterales	Rhodobacteraceae	Family: Rhodobacteraceae	Family: Rhodobacteraceae
a68bb7f4d0e5f44353baf810275bcb61	32	VcPf2N	Unhealthy	Grotta_Vico	VC	White_Cave_Dweller	Cave	Ambient	P.ficiformis	No	Yes	PetrosiaVC	PF5	Bacteria	Proteobacteria	Alphaproteobacteria	Rhodobacterales	Rhodobacteraceae	Family: Rhodobacteraceae	Family: Rhodobacteraceae
aa53a54af60235f6192045941b557b80	32	VcPf2N	Unhealthy	Grotta_Vico	VC	White_Cave_Dweller	Cave	Ambient	P.ficiformis	No	Yes	PetrosiaVC	PF5	Bacteria	Proteobacteria	Alphaproteobacteria	Rhizobiales	Rhizobiaceae	Cohaesibacter	Genus: Cohaesibacter
f08831d3c0d74e73fc80a190e22d1c09	32	VcPf2N	Unhealthy	Grotta_Vico	VC	White_Cave_Dweller	Cave	Ambient	P.ficiformis	No	Yes	PetrosiaVC	PF5	Bacteria	Proteobacteria	Alphaproteobacteria	Rhodospirillales	Terasakiellaceae	Terasakiella	Genus: Terasakiella
41cbb6440619fdb2de3fdbec960e9729	31	VcPf2N	Unhealthy	Grotta_Vico	VC	White_Cave_Dweller	Cave	Ambient	P.ficiformis	No	Yes	PetrosiaVC	PF5	Bacteria	Bacteroidota	Bacteroidia	Chitinophagales	Order: Chitinophagales	Order: Chitinophagales	Order: Chitinophagales
1cb55e255a8101ef324b06f4dfb64c2f	31	VcPf2N	Unhealthy	Grotta_Vico	VC	White_Cave_Dweller	Cave	Ambient	P.ficiformis	No	Yes	PetrosiaVC	PF5	Bacteria	Firmicutes	Clostridia	Lachnospirales	Lachnospiraceae	Vallitalea	Genus: Vallitalea
7d85ff09a11177999f913fa83caf99b2	31	VcPf2N	Unhealthy	Grotta_Vico	VC	White_Cave_Dweller	Cave	Ambient	P.ficiformis	No	Yes	PetrosiaVC	PF5	Archaea	Nanoarchaeota	Nanoarchaeia	Woesearchaeales	SCGC_AAA011-D5	SCGC_AAA011-D5	Genus: SCGC_AAA011-D5
43d41036115c24b7f70f1c0ff1619d91	31	VcPf2N	Unhealthy	Grotta_Vico	VC	White_Cave_Dweller	Cave	Ambient	P.ficiformis	No	Yes	PetrosiaVC	PF5	Bacteria	Patescibacteria	ABY1	Candidatus_Kerfeldbacteria	Candidatus_Kerfeldbacteria	Candidatus_Kerfeldbacteria	Genus: Candidatus_Kerfeldbacteria
f3e35eda5e9cfe136e1c84e685e428a9	31	VcPf2N	Unhealthy	Grotta_Vico	VC	White_Cave_Dweller	Cave	Ambient	P.ficiformis	No	Yes	PetrosiaVC	PF5	Bacteria	Planctomycetota	Planctomycetes	Planctomycetales	Order: Planctomycetales	Order: Planctomycetales	Order: Planctomycetales
24a9c64b0ea511aa4384a9c4b9a0ab9c	31	VcPf2N	Unhealthy	Grotta_Vico	VC	White_Cave_Dweller	Cave	Ambient	P.ficiformis	No	Yes	PetrosiaVC	PF5	Bacteria	Proteobacteria	Alphaproteobacteria	Rhizobiales	Rhizobiaceae	Pseudahrensia	Genus: Pseudahrensia
985ca53f4e80e08a8d0ea3dd7b596701	31	VcPf2N	Unhealthy	Grotta_Vico	VC	White_Cave_Dweller	Cave	Ambient	P.ficiformis	No	Yes	PetrosiaVC	PF5	Bacteria	Proteobacteria	Alphaproteobacteria	Rhizobiales	Stappiaceae	Labrenzia	Genus: Labrenzia
f8a56287040a654f8973a498e66cb6d6	31	VcPf2N	Unhealthy	Grotta_Vico	VC	White_Cave_Dweller	Cave	Ambient	P.ficiformis	No	Yes	PetrosiaVC	PF5	Bacteria	Verrucomicrobiota	Chlamydiae	Chlamydiales	Order: Chlamydiales	Order: Chlamydiales	Order: Chlamydiales
fbba6c7f68c2e0be2c6071ba8527eb9f	30	VcPf2N	Unhealthy	Grotta_Vico	VC	White_Cave_Dweller	Cave	Ambient	P.ficiformis	No	Yes	PetrosiaVC	PF5	Bacteria	Bdellovibrionota	Bdellovibrionia	Bdellovibrionales	Bdellovibrionaceae	OM27_clade	Genus: OM27_clade
eb0f61169229a8f8f90f1434dae7ef83	30	VcPf2N	Unhealthy	Grotta_Vico	VC	White_Cave_Dweller	Cave	Ambient	P.ficiformis	No	Yes	PetrosiaVC	PF5	Bacteria	Planctomycetota	OM190	OM190	OM190	OM190	Genus: OM190
b062921cf07f7c5b9e53ba8486745047	30	VcPf2N	Unhealthy	Grotta_Vico	VC	White_Cave_Dweller	Cave	Ambient	P.ficiformis	No	Yes	PetrosiaVC	PF5	Bacteria	Sumerlaeota	Sumerlaeia	Sumerlaeales	Sumerlaeaceae	Sumerlaea	Genus: Sumerlaea
9bbbe63f9b1101b0a25246dc85ed52cb	29	VcPf2N	Unhealthy	Grotta_Vico	VC	White_Cave_Dweller	Cave	Ambient	P.ficiformis	No	Yes	PetrosiaVC	PF5	Bacteria	Cyanobacteria	Cyanobacteriia	Synechococcales	Cyanobiaceae	Synechococcus_CC9902	Genus: Synechococcus_CC9902
6f28ec338434a1eba7a103d3850752ab	29	VcPf2N	Unhealthy	Grotta_Vico	VC	White_Cave_Dweller	Cave	Ambient	P.ficiformis	No	Yes	PetrosiaVC	PF5	Bacteria	Firmicutes	Clostridia	Peptostreptococcales-Tissierellales	Fusibacteraceae	Fusibacter	Acidaminobacter_sp.
99414da0f7df3819b621dcc16b57dc22	29	VcPf2N	Unhealthy	Grotta_Vico	VC	White_Cave_Dweller	Cave	Ambient	P.ficiformis	No	Yes	PetrosiaVC	PF5	Bacteria	Proteobacteria	Alphaproteobacteria	Rhizobiales	Rhizobiaceae	Family: Rhizobiaceae	Family: Rhizobiaceae
9b240c8571888a70d7c6370186e504e1	29	VcPf2N	Unhealthy	Grotta_Vico	VC	White_Cave_Dweller	Cave	Ambient	P.ficiformis	No	Yes	PetrosiaVC	PF5	Bacteria	Proteobacteria	Alphaproteobacteria	Rhizobiales	Methyloligellaceae	Family: Methyloligellaceae	Family: Methyloligellaceae
5b284059e57a5d7d88d581b7c6525b76	29	VcPf2N	Unhealthy	Grotta_Vico	VC	White_Cave_Dweller	Cave	Ambient	P.ficiformis	No	Yes	PetrosiaVC	PF5	Bacteria	Verrucomicrobiota	Verrucomicrobiae	Opitutales	Puniceicoccaceae	Verruc-01	Genus: Verruc-01
0d6488136be652f3eb604a6d8928ba20	28	VcPf2N	Unhealthy	Grotta_Vico	VC	White_Cave_Dweller	Cave	Ambient	P.ficiformis	No	Yes	PetrosiaVC	PF5	Bacteria	Bacteroidota	Bacteroidia	Class: Bacteroidia	Class: Bacteroidia	Class: Bacteroidia	Class: Bacteroidia
e23836c6e2c0ec6a878c22043635fad1	28	VcPf2N	Unhealthy	Grotta_Vico	VC	White_Cave_Dweller	Cave	Ambient	P.ficiformis	No	Yes	PetrosiaVC	PF5	Bacteria	Bacteroidota	Bacteroidia	Bacteroidales	Prolixibacteraceae	Family: Prolixibacteraceae	Family: Prolixibacteraceae
bdf5d189411a238ae4aa3d0690c76868	28	VcPf2N	Unhealthy	Grotta_Vico	VC	White_Cave_Dweller	Cave	Ambient	P.ficiformis	No	Yes	PetrosiaVC	PF5	Bacteria	Firmicutes	Clostridia	Lachnospirales	Lachnospiraceae	Vallitalea	Genus: Vallitalea
c823de57e600110f152589ccc6ac68b8	28	VcPf2N	Unhealthy	Grotta_Vico	VC	White_Cave_Dweller	Cave	Ambient	P.ficiformis	No	Yes	PetrosiaVC	PF5	Bacteria	Myxococcota	Polyangia	Polyangiales	Eel-36e1D6	Eel-36e1D6	Genus: Eel-36e1D6
23e817b1f99d517d870cdd90ccbeeba9	28	VcPf2N	Unhealthy	Grotta_Vico	VC	White_Cave_Dweller	Cave	Ambient	P.ficiformis	No	Yes	PetrosiaVC	PF5	Bacteria	Planctomycetota	Planctomycetes	Pirellulales	Pirellulaceae	Blastopirellula	Genus: Blastopirellula
d14fdefdccff7843cc8b60473294a8da	28	VcPf2N	Unhealthy	Grotta_Vico	VC	White_Cave_Dweller	Cave	Ambient	P.ficiformis	No	Yes	PetrosiaVC	PF5	Bacteria	Planctomycetota	Planctomycetes	Pirellulales	Pirellulaceae	Rhodopirellula	planctomycete_str.
3ebd7cb736463d8c51094069d59b96b7	28	VcPf2N	Unhealthy	Grotta_Vico	VC	White_Cave_Dweller	Cave	Ambient	P.ficiformis	No	Yes	PetrosiaVC	PF5	Bacteria	Proteobacteria	Alphaproteobacteria	Rhodobacterales	Rhodobacteraceae	Family: Rhodobacteraceae	Family: Rhodobacteraceae
eeef1363940723a3d06d0b0ec6ffa475	28	VcPf2N	Unhealthy	Grotta_Vico	VC	White_Cave_Dweller	Cave	Ambient	P.ficiformis	No	Yes	PetrosiaVC	PF5	Bacteria	Proteobacteria	Alphaproteobacteria	Rhodospirillales	Order: Rhodospirillales	Order: Rhodospirillales	Order: Rhodospirillales
ab595d3ab0ce5dc3e01a5f97884231e0	27	VcPf2N	Unhealthy	Grotta_Vico	VC	White_Cave_Dweller	Cave	Ambient	P.ficiformis	No	Yes	PetrosiaVC	PF5	Bacteria	Bacteroidota	Bacteroidia	Flavobacteriales	Cryomorphaceae	Vicingus	Genus: Vicingus
e0c82ba325ff625e56ad118078704bc2	27	VcPf2N	Unhealthy	Grotta_Vico	VC	White_Cave_Dweller	Cave	Ambient	P.ficiformis	No	Yes	PetrosiaVC	PF5	Bacteria	Bdellovibrionota	Oligoflexia	0319-6G20	0319-6G20	0319-6G20	Genus: 0319-6G20
07ef1cdecd818a9f33f84e06323a8a59	27	VcPf2N	Unhealthy	Grotta_Vico	VC	White_Cave_Dweller	Cave	Ambient	P.ficiformis	No	Yes	PetrosiaVC	PF5	Bacteria	Planctomycetota	OM190	OM190	OM190	OM190	Genus: OM190
1055ed190a1b718e48d03db605faef54	27	VcPf2N	Unhealthy	Grotta_Vico	VC	White_Cave_Dweller	Cave	Ambient	P.ficiformis	No	Yes	PetrosiaVC	PF5	Bacteria	Planctomycetota	Planctomycetes	Planctomycetales	Order: Planctomycetales	Order: Planctomycetales	Order: Planctomycetales
c9c39aeb5088594a6b12d58cd414b571	27	VcPf2N	Unhealthy	Grotta_Vico	VC	White_Cave_Dweller	Cave	Ambient	P.ficiformis	No	Yes	PetrosiaVC	PF5	Bacteria	Planctomycetota	Planctomycetes	Pirellulales	Pirellulaceae	Blastopirellula	Genus: Blastopirellula
cfc876dd768063037610dfdeebc67c99	27	VcPf2N	Unhealthy	Grotta_Vico	VC	White_Cave_Dweller	Cave	Ambient	P.ficiformis	No	Yes	PetrosiaVC	PF5	Bacteria	Planctomycetota	Phycisphaerae	Phycisphaerales	Phycisphaeraceae	Phycisphaera	Genus: Phycisphaera
815af9c12ced57e88c6de446a049f68b	27	VcPf2N	Unhealthy	Grotta_Vico	VC	White_Cave_Dweller	Cave	Ambient	P.ficiformis	No	Yes	PetrosiaVC	PF5	Bacteria	Proteobacteria	Gammaproteobacteria	Enterobacterales	Kangiellaceae	Aliikangiella	Genus: Aliikangiella
a422ee4f50b78d1a02f8d69773e6bac5	27	VcPf2N	Unhealthy	Grotta_Vico	VC	White_Cave_Dweller	Cave	Ambient	P.ficiformis	No	Yes	PetrosiaVC	PF5	Bacteria	Proteobacteria	Alphaproteobacteria	Rhodobacterales	Rhodobacteraceae	Family: Rhodobacteraceae	Family: Rhodobacteraceae
b098b708bad8bb7e79e894e9668491f6	27	VcPf2N	Unhealthy	Grotta_Vico	VC	White_Cave_Dweller	Cave	Ambient	P.ficiformis	No	Yes	PetrosiaVC	PF5	Bacteria	Proteobacteria	Alphaproteobacteria	Rickettsiales	SM2D12	SM2D12	Genus: SM2D12
dc5cb8af9f45fd94fb98ec741a531eec	27	VcPf2N	Unhealthy	Grotta_Vico	VC	White_Cave_Dweller	Cave	Ambient	P.ficiformis	No	Yes	PetrosiaVC	PF5	Bacteria	Proteobacteria	Alphaproteobacteria	Rickettsiales	SM2D12	SM2D12	Genus: SM2D12
e99c68c5271c588d90fb418e01225186	27	VcPf2N	Unhealthy	Grotta_Vico	VC	White_Cave_Dweller	Cave	Ambient	P.ficiformis	No	Yes	PetrosiaVC	PF5	Bacteria	SAR324_clade(B)	SAR324_clade(B)	SAR324_clade(B)	SAR324_clade(B)	SAR324_clade(B)	Genus: SAR324_clade(B)
ea7c0392d8e0e65d8856585104b862c8	27	VcPf2N	Unhealthy	Grotta_Vico	VC	White_Cave_Dweller	Cave	Ambient	P.ficiformis	No	Yes	PetrosiaVC	PF5	Bacteria	Verrucomicrobiota	Chlamydiae	Chlamydiales	Parachlamydiaceae	Neochlamydia	Genus: Neochlamydia
c519754ae8e2980c62fe9500f27330bf	26	VcPf2N	Unhealthy	Grotta_Vico	VC	White_Cave_Dweller	Cave	Ambient	P.ficiformis	No	Yes	PetrosiaVC	PF5	Bacteria	Actinobacteriota	Thermoleophilia	Gaiellales	Order: Gaiellales	Order: Gaiellales	Order: Gaiellales
f1e295b87b76fb60702e856ca1a8893f	26	VcPf2N	Unhealthy	Grotta_Vico	VC	White_Cave_Dweller	Cave	Ambient	P.ficiformis	No	Yes	PetrosiaVC	PF5	Bacteria	Actinobacteriota	Acidimicrobiia	Microtrichales	Microtrichaceae	Sva0996_group	Genus: Sva0996_group
6f451eccab86142bba8d1ddd9b61c28d	26	VcPf2N	Unhealthy	Grotta_Vico	VC	White_Cave_Dweller	Cave	Ambient	P.ficiformis	No	Yes	PetrosiaVC	PF5	Bacteria	Bdellovibrionota	Bdellovibrionia	Bdellovibrionales	Bdellovibrionaceae	Bdellovibrio	Genus: Bdellovibrio
6d41f2fab2b765aeaacd0bc8b4594149	26	VcPf2N	Unhealthy	Grotta_Vico	VC	White_Cave_Dweller	Cave	Ambient	P.ficiformis	No	Yes	PetrosiaVC	PF5	Bacteria	Firmicutes	Clostridia	Christensenellales	Christensenellaceae	Family: Christensenellaceae	Family: Christensenellaceae
0c11f1b182275cf2688a18e5f2b9e047	26	VcPf2N	Unhealthy	Grotta_Vico	VC	White_Cave_Dweller	Cave	Ambient	P.ficiformis	No	Yes	PetrosiaVC	PF5	Bacteria	Planctomycetota	Planctomycetes	Pirellulales	Pirellulaceae	Rubripirellula	Genus: Rubripirellula
b479f818c9c1b364402d35499413cd9b	26	VcPf2N	Unhealthy	Grotta_Vico	VC	White_Cave_Dweller	Cave	Ambient	P.ficiformis	No	Yes	PetrosiaVC	PF5	Bacteria	Planctomycetota	Planctomycetes	Pirellulales	Pirellulaceae	Rhodopirellula	Genus: Rhodopirellula
babe0ac5d14c053075512455a9fc512e	26	VcPf2N	Unhealthy	Grotta_Vico	VC	White_Cave_Dweller	Cave	Ambient	P.ficiformis	No	Yes	PetrosiaVC	PF5	Bacteria	Planctomycetota	Planctomycetes	Pirellulales	Pirellulaceae	Rhodopirellula	Genus: Rhodopirellula
53c5e014f63a1fc82fe66bbf2ac0d73c	26	VcPf2N	Unhealthy	Grotta_Vico	VC	White_Cave_Dweller	Cave	Ambient	P.ficiformis	No	Yes	PetrosiaVC	PF5	Bacteria	Proteobacteria	Gammaproteobacteria	Enterobacterales	Vibrionaceae	Vibrio	bacterium_4H201
944ad7eadddab3f01183dc5dc54008a4	26	VcPf2N	Unhealthy	Grotta_Vico	VC	White_Cave_Dweller	Cave	Ambient	P.ficiformis	No	Yes	PetrosiaVC	PF5	Bacteria	Proteobacteria	Gammaproteobacteria	Pseudomonadales	Cellvibrionaceae	Pseudoteredinibacter	Genus: Pseudoteredinibacter
8a0201963915b4a42cad49d9dfaf72fb	26	VcPf2N	Unhealthy	Grotta_Vico	VC	White_Cave_Dweller	Cave	Ambient	P.ficiformis	No	Yes	PetrosiaVC	PF5	Bacteria	SAR324_clade(B)	SAR324_clade(B)	SAR324_clade(B)	SAR324_clade(B)	SAR324_clade(B)	Genus: SAR324_clade(B)
5da9a7caf12b007b8abcbb60c0e80c22	25	VcPf2N	Unhealthy	Grotta_Vico	VC	White_Cave_Dweller	Cave	Ambient	P.ficiformis	No	Yes	PetrosiaVC	PF5	Bacteria	Bacteroidota	Bacteroidia	Chitinophagales	Saprospiraceae	Rubidimonas	Genus: Rubidimonas
c12810df37be9dfb003365e2dff02b8d	25	VcPf2N	Unhealthy	Grotta_Vico	VC	White_Cave_Dweller	Cave	Ambient	P.ficiformis	No	Yes	PetrosiaVC	PF5	Bacteria	Planctomycetota	Planctomycetes	Pirellulales	Pirellulaceae	Bythopirellula	Genus: Bythopirellula
ca19f8162a39d72f5ff968deef103981	25	VcPf2N	Unhealthy	Grotta_Vico	VC	White_Cave_Dweller	Cave	Ambient	P.ficiformis	No	Yes	PetrosiaVC	PF5	Bacteria	Planctomycetota	OM190	OM190	OM190	OM190	Genus: OM190
e022c15b5a999155b5a1b0641a4d038b	25	VcPf2N	Unhealthy	Grotta_Vico	VC	White_Cave_Dweller	Cave	Ambient	P.ficiformis	No	Yes	PetrosiaVC	PF5	Bacteria	Proteobacteria	Gammaproteobacteria	Gammaproteobacteria_Incertae_Sedis	Order: Gammaproteobacteria_Incertae_Sedis	Order: Gammaproteobacteria_Incertae_Sedis	Order: Gammaproteobacteria_Incertae_Sedis
e8300c208ad1086abd0aa75b6f86ab3a	25	VcPf2N	Unhealthy	Grotta_Vico	VC	White_Cave_Dweller	Cave	Ambient	P.ficiformis	No	Yes	PetrosiaVC	PF5	Bacteria	Proteobacteria	Alphaproteobacteria	Micavibrionales	Micavibrionaceae	Family: Micavibrionaceae	Family: Micavibrionaceae
28455361c634f4ae33e3b765ce3fdfdd	24	VcPf2N	Unhealthy	Grotta_Vico	VC	White_Cave_Dweller	Cave	Ambient	P.ficiformis	No	Yes	PetrosiaVC	PF5	Bacteria	Bacteroidota	Bacteroidia	Flavobacteriales	Crocinitomicaceae	Crocinitomix	Genus: Crocinitomix
52025238770f6af3e665056a77e6299e	24	VcPf2N	Unhealthy	Grotta_Vico	VC	White_Cave_Dweller	Cave	Ambient	P.ficiformis	No	Yes	PetrosiaVC	PF5	Bacteria	Bacteroidota	Bacteroidia	Chitinophagales	Saprospiraceae	Lewinella	Genus: Lewinella
c1192cf18e71941c54cae65022940c99	24	VcPf2N	Unhealthy	Grotta_Vico	VC	White_Cave_Dweller	Cave	Ambient	P.ficiformis	No	Yes	PetrosiaVC	PF5	Bacteria	Firmicutes	Clostridia	Oscillospirales	[Eubacterium]_coprostanoligenes	[Eubacterium]_coprostanoligenes	Genus: [Eubacterium]_coprostanoligenes
9c07a0731c1761ab9fbb000dd5feac10	24	VcPf2N	Unhealthy	Grotta_Vico	VC	White_Cave_Dweller	Cave	Ambient	P.ficiformis	No	Yes	PetrosiaVC	PF5	Bacteria	Planctomycetota	Phycisphaerae	Phycisphaerales	Phycisphaeraceae	SM1A02	Genus: SM1A02
f435409d052f2bb791bc8d7ef9dda02f	24	VcPf2N	Unhealthy	Grotta_Vico	VC	White_Cave_Dweller	Cave	Ambient	P.ficiformis	No	Yes	PetrosiaVC	PF5	Bacteria	Planctomycetota	Planctomycetes	Pirellulales	Pirellulaceae	Blastopirellula	Genus: Blastopirellula
53ca5fa1ee28e44048948dab3f0bc190	24	VcPf2N	Unhealthy	Grotta_Vico	VC	White_Cave_Dweller	Cave	Ambient	P.ficiformis	No	Yes	PetrosiaVC	PF5	Bacteria	Proteobacteria	Alphaproteobacteria	Caulobacterales	Parvularculaceae	Marinicaulis	Genus: Marinicaulis
1b511cba558df41f1cbdebb26fbd0839	23	VcPf2N	Unhealthy	Grotta_Vico	VC	White_Cave_Dweller	Cave	Ambient	P.ficiformis	No	Yes	PetrosiaVC	PF5	Bacteria	Planctomycetota	OM190	OM190	OM190	OM190	Genus: OM190
3aa6d3cec17567833069161d31811238	23	VcPf2N	Unhealthy	Grotta_Vico	VC	White_Cave_Dweller	Cave	Ambient	P.ficiformis	No	Yes	PetrosiaVC	PF5	Bacteria	Planctomycetota	OM190	OM190	OM190	OM190	Genus: OM190
e8ce0d0f40bc6b27e855ab7f2634c140	23	VcPf2N	Unhealthy	Grotta_Vico	VC	White_Cave_Dweller	Cave	Ambient	P.ficiformis	No	Yes	PetrosiaVC	PF5	Bacteria	Planctomycetota	Phycisphaerae	Phycisphaerales	Phycisphaeraceae	Urania-1B-19_sediment	Genus: Urania-1B-19_sediment
9679462c139c7aff096ea17be1cc9c7b	23	VcPf2N	Unhealthy	Grotta_Vico	VC	White_Cave_Dweller	Cave	Ambient	P.ficiformis	No	Yes	PetrosiaVC	PF5	Bacteria	Proteobacteria	Alphaproteobacteria	Rhodobacterales	Rhodobacteraceae	Family: Rhodobacteraceae	Family: Rhodobacteraceae
aef0678e5a5d7b0adeaade4a52013f7d	23	VcPf2N	Unhealthy	Grotta_Vico	VC	White_Cave_Dweller	Cave	Ambient	P.ficiformis	No	Yes	PetrosiaVC	PF5	Bacteria	Proteobacteria	Gammaproteobacteria	Pseudomonadales	Porticoccaceae	Porticoccus	Genus: Porticoccus
9facd2806bfdaa6cbe1507595bf0024a	22	VcPf2N	Unhealthy	Grotta_Vico	VC	White_Cave_Dweller	Cave	Ambient	P.ficiformis	No	Yes	PetrosiaVC	PF5	Bacteria	Planctomycetota	Planctomycetes	Pirellulales	Pirellulaceae	Blastopirellula	Genus: Blastopirellula
cbb61b449b5005a5f1b1e22737ad3e7b	22	VcPf2N	Unhealthy	Grotta_Vico	VC	White_Cave_Dweller	Cave	Ambient	P.ficiformis	No	Yes	PetrosiaVC	PF5	Bacteria	Planctomycetota	Phycisphaerae	MSBL9	L21-RPul-D3	L21-RPul-D3	Genus: L21-RPul-D3
5efabdabda08fadd1c5ac5f4893022fd	22	VcPf2N	Unhealthy	Grotta_Vico	VC	White_Cave_Dweller	Cave	Ambient	P.ficiformis	No	Yes	PetrosiaVC	PF5	Bacteria	Proteobacteria	Alphaproteobacteria	Rhodobacterales	Rhodobacteraceae	Family: Rhodobacteraceae	Family: Rhodobacteraceae
7d2dee78b6b18d6409fd21a7e3437d2c	22	VcPf2N	Unhealthy	Grotta_Vico	VC	White_Cave_Dweller	Cave	Ambient	P.ficiformis	No	Yes	PetrosiaVC	PF5	Bacteria	Proteobacteria	Gammaproteobacteria	Arenicellales	Arenicellaceae	Family: Arenicellaceae	Family: Arenicellaceae
b16212e32f5d902ee82f824060d990ef	22	VcPf2N	Unhealthy	Grotta_Vico	VC	White_Cave_Dweller	Cave	Ambient	P.ficiformis	No	Yes	PetrosiaVC	PF5	Bacteria	Proteobacteria	Alphaproteobacteria	Micavibrionales	Order: Micavibrionales	Order: Micavibrionales	Order: Micavibrionales
c6f286bf2838fa087f9748a6cac65857	22	VcPf2N	Unhealthy	Grotta_Vico	VC	White_Cave_Dweller	Cave	Ambient	P.ficiformis	No	Yes	PetrosiaVC	PF5	Bacteria	Proteobacteria	Alphaproteobacteria	Rhodospirillales	Magnetospiraceae	Family: Magnetospiraceae	Family: Magnetospiraceae
fc47f4d2b0b8f5ffee9813f10c178063	22	VcPf2N	Unhealthy	Grotta_Vico	VC	White_Cave_Dweller	Cave	Ambient	P.ficiformis	No	Yes	PetrosiaVC	PF5	Bacteria	Proteobacteria	Alphaproteobacteria	Puniceispirillales	Order: Puniceispirillales	Order: Puniceispirillales	Order: Puniceispirillales
59cde200f09ccde2fa51cd02c466f5a6	21	VcPf2N	Unhealthy	Grotta_Vico	VC	White_Cave_Dweller	Cave	Ambient	P.ficiformis	No	Yes	PetrosiaVC	PF5	Bacteria	Acidobacteriota	Aminicenantia	Aminicenantales	Aminicenantales	Aminicenantales	Genus: Aminicenantales
9c04e15a4e43be7f06eaded33ced911a	21	VcPf2N	Unhealthy	Grotta_Vico	VC	White_Cave_Dweller	Cave	Ambient	P.ficiformis	No	Yes	PetrosiaVC	PF5	Bacteria	Cyanobacteria	Vampirivibrionia	Gastranaerophilales	Gastranaerophilales	Gastranaerophilales	Genus: Gastranaerophilales
45492c1db1dc8f7e53c912c304a7fe1c	21	VcPf2N	Unhealthy	Grotta_Vico	VC	White_Cave_Dweller	Cave	Ambient	P.ficiformis	No	Yes	PetrosiaVC	PF5	Bacteria	Firmicutes	Clostridia	Christensenellales	Christensenellaceae	Christensenellaceae_R-7	Genus: Christensenellaceae_R-7
40af68d76deed7081f3a3ff347dde799	21	VcPf2N	Unhealthy	Grotta_Vico	VC	White_Cave_Dweller	Cave	Ambient	P.ficiformis	No	Yes	PetrosiaVC	PF5	Bacteria	Planctomycetota	Planctomycetes	Pirellulales	Pirellulaceae	Blastopirellula	Genus: Blastopirellula
79b296770508d2d4590f1beafe45b840	21	VcPf2N	Unhealthy	Grotta_Vico	VC	White_Cave_Dweller	Cave	Ambient	P.ficiformis	No	Yes	PetrosiaVC	PF5	Bacteria	Planctomycetota	Phycisphaerae	Phycisphaerales	Phycisphaeraceae	Family: Phycisphaeraceae	Family: Phycisphaeraceae
a05ffcc25f0486b1cad54a50e1a6fb9c	21	VcPf2N	Unhealthy	Grotta_Vico	VC	White_Cave_Dweller	Cave	Ambient	P.ficiformis	No	Yes	PetrosiaVC	PF5	Bacteria	Proteobacteria	Alphaproteobacteria	Micavibrionales	Micavibrionaceae	Family: Micavibrionaceae	Family: Micavibrionaceae
fc85a2441c4bee7f8ba0d40dd90f3b47	21	VcPf2N	Unhealthy	Grotta_Vico	VC	White_Cave_Dweller	Cave	Ambient	P.ficiformis	No	Yes	PetrosiaVC	PF5	Bacteria	Proteobacteria	Alphaproteobacteria	Rhodobacterales	Rhodobacteraceae	Family: Rhodobacteraceae	Family: Rhodobacteraceae
c8831455d91b849221bcf231938cedb0	20	VcPf2N	Unhealthy	Grotta_Vico	VC	White_Cave_Dweller	Cave	Ambient	P.ficiformis	No	Yes	PetrosiaVC	PF5	Bacteria	Bacteroidota	Kapabacteria	Kapabacteriales	Kapabacteriales	Kapabacteriales	Genus: Kapabacteriales
b96b1e589e704b6a643f86890117cfa7	20	VcPf2N	Unhealthy	Grotta_Vico	VC	White_Cave_Dweller	Cave	Ambient	P.ficiformis	No	Yes	PetrosiaVC	PF5	Bacteria	Nitrospirota	Nitrospiria	Nitrospirales	Nitrospiraceae	Nitrospira	Genus: Nitrospira
fea79878ea06ce062ab91316251d63ed	20	VcPf2N	Unhealthy	Grotta_Vico	VC	White_Cave_Dweller	Cave	Ambient	P.ficiformis	No	Yes	PetrosiaVC	PF5	Bacteria	Planctomycetota	Planctomycetes	Pirellulales	Pirellulaceae	Blastopirellula	Planctomyces_sp.
128a1288f7d748bc62a55942f0794d2c	20	VcPf2N	Unhealthy	Grotta_Vico	VC	White_Cave_Dweller	Cave	Ambient	P.ficiformis	No	Yes	PetrosiaVC	PF5	Bacteria	Proteobacteria	Alphaproteobacteria	Rhodospirillales	Order: Rhodospirillales	Order: Rhodospirillales	Order: Rhodospirillales
70ab0c542435925f2fc6ce0c13f72b1e	20	VcPf2N	Unhealthy	Grotta_Vico	VC	White_Cave_Dweller	Cave	Ambient	P.ficiformis	No	Yes	PetrosiaVC	PF5	Bacteria	Proteobacteria	Alphaproteobacteria	Class: Alphaproteobacteria	Class: Alphaproteobacteria	Class: Alphaproteobacteria	Class: Alphaproteobacteria
e925277dd50305edd75f7673d9dc2b65	20	VcPf2N	Unhealthy	Grotta_Vico	VC	White_Cave_Dweller	Cave	Ambient	P.ficiformis	No	Yes	PetrosiaVC	PF5	Bacteria	Verrucomicrobiota	Chlamydiae	Chlamydiales	Parachlamydiaceae	Neochlamydia	Genus: Neochlamydia
318c3c6a14aed9d629284ae6c933bc18	19	VcPf2N	Unhealthy	Grotta_Vico	VC	White_Cave_Dweller	Cave	Ambient	P.ficiformis	No	Yes	PetrosiaVC	PF5	Bacteria	Actinobacteriota	Acidimicrobiia	Microtrichales	Microtrichaceae	Sva0996_group	Genus: Sva0996_group
908e90a55b13f98d5c02b34726f06959	19	VcPf2N	Unhealthy	Grotta_Vico	VC	White_Cave_Dweller	Cave	Ambient	P.ficiformis	No	Yes	PetrosiaVC	PF5	Bacteria	Bacteroidota	Bacteroidia	Flavobacteriales	Flavobacteriaceae	Aquibacter	Genus: Aquibacter
2b61929dae032ddd4faf318aec94ca9b	19	VcPf2N	Unhealthy	Grotta_Vico	VC	White_Cave_Dweller	Cave	Ambient	P.ficiformis	No	Yes	PetrosiaVC	PF5	Bacteria	Chloroflexi	Anaerolineae	SBR1031	A4b	A4b	Genus: A4b
57e0eda34fc3188db686ccc37bd08f0e	19	VcPf2N	Unhealthy	Grotta_Vico	VC	White_Cave_Dweller	Cave	Ambient	P.ficiformis	No	Yes	PetrosiaVC	PF5	Bacteria	Firmicutes	Clostridia	Lachnospirales	Lachnospiraceae	Family: Lachnospiraceae	Family: Lachnospiraceae
bb000ec9e1c41018b3eb929c4ee81b9a	19	VcPf2N	Unhealthy	Grotta_Vico	VC	White_Cave_Dweller	Cave	Ambient	P.ficiformis	No	Yes	PetrosiaVC	PF5	Bacteria	Firmicutes	Clostridia	Peptostreptococcales-Tissierellales	Fusibacteraceae	Fusibacter	Genus: Fusibacter
1a93a60b95129ab6c78109b9ad2c166f	19	VcPf2N	Unhealthy	Grotta_Vico	VC	White_Cave_Dweller	Cave	Ambient	P.ficiformis	No	Yes	PetrosiaVC	PF5	Bacteria	Kingdom: Bacteria	Kingdom: Bacteria	Kingdom: Bacteria	Kingdom: Bacteria	Kingdom: Bacteria	Kingdom: Bacteria
2492c266301222d74f26a7bfcc5cf70c	19	VcPf2N	Unhealthy	Grotta_Vico	VC	White_Cave_Dweller	Cave	Ambient	P.ficiformis	No	Yes	PetrosiaVC	PF5	Bacteria	Planctomycetota	Planctomycetes	Pirellulales	Pirellulaceae	Pir4_lineage	Genus: Pir4_lineage
24a99848b4931a71dc34d2526879edd2	19	VcPf2N	Unhealthy	Grotta_Vico	VC	White_Cave_Dweller	Cave	Ambient	P.ficiformis	No	Yes	PetrosiaVC	PF5	Bacteria	Planctomycetota	Planctomycetes	Pirellulales	Pirellulaceae	Blastopirellula	Genus: Blastopirellula
3ddb50ff4f46a9eee05b1b2e428e4c79	19	VcPf2N	Unhealthy	Grotta_Vico	VC	White_Cave_Dweller	Cave	Ambient	P.ficiformis	No	Yes	PetrosiaVC	PF5	Bacteria	Planctomycetota	Planctomycetes	Pirellulales	Pirellulaceae	Rhodopirellula	Genus: Rhodopirellula
a9878de813822f9a5ad88e47fde09690	19	VcPf2N	Unhealthy	Grotta_Vico	VC	White_Cave_Dweller	Cave	Ambient	P.ficiformis	No	Yes	PetrosiaVC	PF5	Bacteria	Planctomycetota	Planctomycetes	Pirellulales	Pirellulaceae	Blastopirellula	planctomycete_MS1316
6cf2235f2c39e406d6a4356b6873eb14	19	VcPf2N	Unhealthy	Grotta_Vico	VC	White_Cave_Dweller	Cave	Ambient	P.ficiformis	No	Yes	PetrosiaVC	PF5	Bacteria	Proteobacteria	Gammaproteobacteria	Pseudomonadales	Spongiibacteraceae	BD1-7_clade	Genus: BD1-7_clade
70dc098aec981da1c75f3e79534ab13d	19	VcPf2N	Unhealthy	Grotta_Vico	VC	White_Cave_Dweller	Cave	Ambient	P.ficiformis	No	Yes	PetrosiaVC	PF5	Bacteria	Spirochaetota	Leptospirae	Leptospirales	Leptospiraceae	Family: Leptospiraceae	Family: Leptospiraceae
c7ebcc517ff1ce2a01f7085aa3c49aab	18	VcPf2N	Unhealthy	Grotta_Vico	VC	White_Cave_Dweller	Cave	Ambient	P.ficiformis	No	Yes	PetrosiaVC	PF5	Bacteria	Bdellovibrionota	Bdellovibrionia	Bacteriovoracales	Bacteriovoracaceae	Peredibacter	Genus: Peredibacter
3b9f5c1a7a73c61ecfeafdf59f28ac9a	18	VcPf2N	Unhealthy	Grotta_Vico	VC	White_Cave_Dweller	Cave	Ambient	P.ficiformis	No	Yes	PetrosiaVC	PF5	Bacteria	Cloacimonadota	Cloacimonadia	Cloacimonadales	LK-44f	LK-44f	Genus: LK-44f
e7e8ad9ad75d14a8a190af71d1eb9818	18	VcPf2N	Unhealthy	Grotta_Vico	VC	White_Cave_Dweller	Cave	Ambient	P.ficiformis	No	Yes	PetrosiaVC	PF5	Bacteria	Desulfobacterota	Desulfuromonadia	Bradymonadales	Bradymonadales	Bradymonadales	Genus: Bradymonadales
a5dbe35bb788c67abb5ce73af54cafaf	18	VcPf2N	Unhealthy	Grotta_Vico	VC	White_Cave_Dweller	Cave	Ambient	P.ficiformis	No	Yes	PetrosiaVC	PF5	Bacteria	Firmicutes	Clostridia	Clostridiales	Clostridiaceae	Family: Clostridiaceae	Family: Clostridiaceae
51ea200db28ddbf0daae3939a8776db2	18	VcPf2N	Unhealthy	Grotta_Vico	VC	White_Cave_Dweller	Cave	Ambient	P.ficiformis	No	Yes	PetrosiaVC	PF5	Bacteria	Planctomycetota	OM190	OM190	OM190	OM190	Genus: OM190
e256839ef4ac035a87dc8941370674d8	18	VcPf2N	Unhealthy	Grotta_Vico	VC	White_Cave_Dweller	Cave	Ambient	P.ficiformis	No	Yes	PetrosiaVC	PF5	Bacteria	Planctomycetota	Planctomycetes	Pirellulales	Pirellulaceae	Rhodopirellula	planctomycete_DDSe3004
96fff8433b0893b75817719dc0d1989f	18	VcPf2N	Unhealthy	Grotta_Vico	VC	White_Cave_Dweller	Cave	Ambient	P.ficiformis	No	Yes	PetrosiaVC	PF5	Bacteria	Proteobacteria	Alphaproteobacteria	Caulobacterales	Parvularculaceae	Parvularcula	Genus: Parvularcula
7602292af2bd83e7fe28fa04052d3d47	18	VcPf2N	Unhealthy	Grotta_Vico	VC	White_Cave_Dweller	Cave	Ambient	P.ficiformis	No	Yes	PetrosiaVC	PF5	Bacteria	Verrucomicrobiota	Lentisphaeria	Victivallales	PRD18C08	PRD18C08	Genus: PRD18C08
27bbb43cf5b353fabf152aebf023e4b9	17	VcPf2N	Unhealthy	Grotta_Vico	VC	White_Cave_Dweller	Cave	Ambient	P.ficiformis	No	Yes	PetrosiaVC	PF5	Bacteria	Bacteroidota	Bacteroidia	Flavobacteriales	Cryomorphaceae	Family: Cryomorphaceae	Family: Cryomorphaceae
30c727371f35747c1e3364be6eeed160	17	VcPf2N	Unhealthy	Grotta_Vico	VC	White_Cave_Dweller	Cave	Ambient	P.ficiformis	No	Yes	PetrosiaVC	PF5	Bacteria	Cyanobacteria	Vampirivibrionia	Caenarcaniphilales	Caenarcaniphilales	Caenarcaniphilales	Genus: Caenarcaniphilales
4f719e5c24cdae05ca28cc6a23f7f648	17	VcPf2N	Unhealthy	Grotta_Vico	VC	White_Cave_Dweller	Cave	Ambient	P.ficiformis	No	Yes	PetrosiaVC	PF5	Bacteria	Planctomycetota	Phycisphaerae	Phycisphaerales	Phycisphaeraceae	SM1A02	Genus: SM1A02
5fccd8f31070e49c02930fa9667daf57	17	VcPf2N	Unhealthy	Grotta_Vico	VC	White_Cave_Dweller	Cave	Ambient	P.ficiformis	No	Yes	PetrosiaVC	PF5	Bacteria	Planctomycetota	Planctomycetes	Pirellulales	Pirellulaceae	Rhodopirellula	Genus: Rhodopirellula
8d96d4f81f3a2806559c5d5e3527b461	17	VcPf2N	Unhealthy	Grotta_Vico	VC	White_Cave_Dweller	Cave	Ambient	P.ficiformis	No	Yes	PetrosiaVC	PF5	Bacteria	Planctomycetota	Phycisphaerae	Phycisphaerales	Phycisphaeraceae	SM1A02	Genus: SM1A02
9e6f9855d0ff81365ae74d4d112b1c06	17	VcPf2N	Unhealthy	Grotta_Vico	VC	White_Cave_Dweller	Cave	Ambient	P.ficiformis	No	Yes	PetrosiaVC	PF5	Bacteria	Planctomycetota	Planctomycetes	Pirellulales	Pirellulaceae	Pirellula	Genus: Pirellula
bae86109440410c73ebaa3c31945254b	17	VcPf2N	Unhealthy	Grotta_Vico	VC	White_Cave_Dweller	Cave	Ambient	P.ficiformis	No	Yes	PetrosiaVC	PF5	Bacteria	Planctomycetota	Planctomycetes	Planctomycetales	Rubinisphaeraceae	Planctomicrobium	Genus: Planctomicrobium
1b6481260dd5b7c200ca08b082bc9d8b	17	VcPf2N	Unhealthy	Grotta_Vico	VC	White_Cave_Dweller	Cave	Ambient	P.ficiformis	No	Yes	PetrosiaVC	PF5	Bacteria	Proteobacteria	Gammaproteobacteria	Pseudomonadales	Spongiibacteraceae	Family: Spongiibacteraceae	Family: Spongiibacteraceae
1eff3ebd7dde1382c17801a9d6298ba9	17	VcPf2N	Unhealthy	Grotta_Vico	VC	White_Cave_Dweller	Cave	Ambient	P.ficiformis	No	Yes	PetrosiaVC	PF5	Bacteria	Proteobacteria	Alphaproteobacteria	Rhodospirillales	Terasakiellaceae	Family: Terasakiellaceae	Family: Terasakiellaceae
1fcc27acd6671e3d7b53c1728e0b69a4	17	VcPf2N	Unhealthy	Grotta_Vico	VC	White_Cave_Dweller	Cave	Ambient	P.ficiformis	No	Yes	PetrosiaVC	PF5	Bacteria	Proteobacteria	Gammaproteobacteria	Pseudomonadales	Spongiibacteraceae	Family: Spongiibacteraceae	Family: Spongiibacteraceae
734dd2fb576b29a7e841f85408827e76	17	VcPf2N	Unhealthy	Grotta_Vico	VC	White_Cave_Dweller	Cave	Ambient	P.ficiformis	No	Yes	PetrosiaVC	PF5	Bacteria	Proteobacteria	Alphaproteobacteria	Rhodospirillales	Order: Rhodospirillales	Order: Rhodospirillales	Order: Rhodospirillales
b30de7ac10ef37aea635a0b8e8f50eb8	17	VcPf2N	Unhealthy	Grotta_Vico	VC	White_Cave_Dweller	Cave	Ambient	P.ficiformis	No	Yes	PetrosiaVC	PF5	Bacteria	Proteobacteria	Magnetococcia	Magnetococcales	Magnetococcaceae	Magnetococcus	Genus: Magnetococcus
05b87221a0fd4431cfae03c7c99b1967	16	VcPf2N	Unhealthy	Grotta_Vico	VC	White_Cave_Dweller	Cave	Ambient	P.ficiformis	No	Yes	PetrosiaVC	PF5	Bacteria	Bacteroidota	Bacteroidia	Bacteroidales	Prolixibacteraceae	Draconibacterium	Genus: Draconibacterium
35f66a36646ee260174f7acfb29d6aaa	16	VcPf2N	Unhealthy	Grotta_Vico	VC	White_Cave_Dweller	Cave	Ambient	P.ficiformis	No	Yes	PetrosiaVC	PF5	Bacteria	Bdellovibrionota	Bdellovibrionia	Bacteriovoracales	Bacteriovoracaceae	Family: Bacteriovoracaceae	Family: Bacteriovoracaceae
7394bb2be55a0b93e818dab3defd5df4	16	VcPf2N	Unhealthy	Grotta_Vico	VC	White_Cave_Dweller	Cave	Ambient	P.ficiformis	No	Yes	PetrosiaVC	PF5	Bacteria	Bdellovibrionota	Bdellovibrionia	Bacteriovoracales	Bacteriovoracaceae	Peredibacter	Genus: Peredibacter
9a32a82d1ebef7e7f9ac9054a33469d9	16	VcPf2N	Unhealthy	Grotta_Vico	VC	White_Cave_Dweller	Cave	Ambient	P.ficiformis	No	Yes	PetrosiaVC	PF5	Bacteria	Bdellovibrionota	Oligoflexia	0319-6G20	0319-6G20	0319-6G20	Genus: 0319-6G20
f9f148255512fc25a2401e3c1f0bed68	16	VcPf2N	Unhealthy	Grotta_Vico	VC	White_Cave_Dweller	Cave	Ambient	P.ficiformis	No	Yes	PetrosiaVC	PF5	Bacteria	Bdellovibrionota	Bdellovibrionia	Bacteriovoracales	Bacteriovoracaceae	Peredibacter	Genus: Peredibacter
742ced2a280d3872e2b5442c2a777ca1	16	VcPf2N	Unhealthy	Grotta_Vico	VC	White_Cave_Dweller	Cave	Ambient	P.ficiformis	No	Yes	PetrosiaVC	PF5	Bacteria	Cyanobacteria	Cyanobacteriia	Synechococcales	Cyanobiaceae	Cyanobium_PCC-6307	Genus: Cyanobium_PCC-6307
6b2ac4dbe281471e46054696cd9cf21e	16	VcPf2N	Unhealthy	Grotta_Vico	VC	White_Cave_Dweller	Cave	Ambient	P.ficiformis	No	Yes	PetrosiaVC	PF5	Bacteria	Patescibacteria	Parcubacteria	Candidatus_Spechtbacteria	Candidatus_Spechtbacteria	Candidatus_Spechtbacteria	Genus: Candidatus_Spechtbacteria
9dc6b4b37a21c31fa6128fd0f6401a96	16	VcPf2N	Unhealthy	Grotta_Vico	VC	White_Cave_Dweller	Cave	Ambient	P.ficiformis	No	Yes	PetrosiaVC	PF5	Bacteria	Planctomycetota	Planctomycetes	Pirellulales	Pirellulaceae	Rubripirellula	Genus: Rubripirellula
c5c1bcbd17cbaddc6ef93b657dec4703	16	VcPf2N	Unhealthy	Grotta_Vico	VC	White_Cave_Dweller	Cave	Ambient	P.ficiformis	No	Yes	PetrosiaVC	PF5	Bacteria	Planctomycetota	Phycisphaerae	Phycisphaerales	Phycisphaeraceae	SM1A02	Genus: SM1A02
e34e8f65dfbd6a1edb9af50d7af54fe5	16	VcPf2N	Unhealthy	Grotta_Vico	VC	White_Cave_Dweller	Cave	Ambient	P.ficiformis	No	Yes	PetrosiaVC	PF5	Bacteria	Planctomycetota	OM190	OM190	OM190	OM190	Genus: OM190
f4ccf774311cbadf705cbeedee46a38c	16	VcPf2N	Unhealthy	Grotta_Vico	VC	White_Cave_Dweller	Cave	Ambient	P.ficiformis	No	Yes	PetrosiaVC	PF5	Bacteria	Planctomycetota	Phycisphaerae	Phycisphaerales	Phycisphaeraceae	Family: Phycisphaeraceae	Family: Phycisphaeraceae
28367fe4b107339ab27aeaa66cadcb31	16	VcPf2N	Unhealthy	Grotta_Vico	VC	White_Cave_Dweller	Cave	Ambient	P.ficiformis	No	Yes	PetrosiaVC	PF5	Bacteria	Proteobacteria	Gammaproteobacteria	Gammaproteobacteria_Incertae_Sedis	Order: Gammaproteobacteria_Incertae_Sedis	Order: Gammaproteobacteria_Incertae_Sedis	Order: Gammaproteobacteria_Incertae_Sedis
828271a1e92d2b67785da31401205226	16	VcPf2N	Unhealthy	Grotta_Vico	VC	White_Cave_Dweller	Cave	Ambient	P.ficiformis	No	Yes	PetrosiaVC	PF5	Bacteria	Proteobacteria	Alphaproteobacteria	Rhizobiales	Rhizobiales_Incertae_Sedis	Anderseniella	Genus: Anderseniella
c3408c92c74ee0bfacabc05e7cc590b4	16	VcPf2N	Unhealthy	Grotta_Vico	VC	White_Cave_Dweller	Cave	Ambient	P.ficiformis	No	Yes	PetrosiaVC	PF5	Bacteria	Proteobacteria	Alphaproteobacteria	Thalassobaculales	Order: Thalassobaculales	Order: Thalassobaculales	Order: Thalassobaculales
df78cb11fcad53df05ce8d3e9bd33eff	16	VcPf2N	Unhealthy	Grotta_Vico	VC	White_Cave_Dweller	Cave	Ambient	P.ficiformis	No	Yes	PetrosiaVC	PF5	Bacteria	Proteobacteria	Gammaproteobacteria	Class: Gammaproteobacteria	Class: Gammaproteobacteria	Class: Gammaproteobacteria	Class: Gammaproteobacteria
e0d6711ac6a2c034c52f830b73411627	16	VcPf2N	Unhealthy	Grotta_Vico	VC	White_Cave_Dweller	Cave	Ambient	P.ficiformis	No	Yes	PetrosiaVC	PF5	Bacteria	Proteobacteria	Gammaproteobacteria	Arenicellales	Arenicellaceae	HTCC5015	Genus: HTCC5015
122b47318cbd39d6942aaaf7af0ec9ae	16	VcPf2N	Unhealthy	Grotta_Vico	VC	White_Cave_Dweller	Cave	Ambient	P.ficiformis	No	Yes	PetrosiaVC	PF5	Bacteria	Verrucomicrobiota	Verrucomicrobiae	Verrucomicrobiales	DEV007	DEV007	Genus: DEV007
670da3bed7e86a49ed6306054ef013f7	15	VcPf2N	Unhealthy	Grotta_Vico	VC	White_Cave_Dweller	Cave	Ambient	P.ficiformis	No	Yes	PetrosiaVC	PF5	Bacteria	Bacteroidota	Bacteroidia	Flavobacteriales	Flavobacteriaceae	Psychroserpens	Genus: Psychroserpens
72b715b41dcafdfed638ed99c73a2eda	15	VcPf2N	Unhealthy	Grotta_Vico	VC	White_Cave_Dweller	Cave	Ambient	P.ficiformis	No	Yes	PetrosiaVC	PF5	Bacteria	Bacteroidota	Bacteroidia	Sphingobacteriales	NS11-12_group	NS11-12_group	Genus: NS11-12_group
e02cb66c82e0d87bd2f46c8a59e31f0f	15	VcPf2N	Unhealthy	Grotta_Vico	VC	White_Cave_Dweller	Cave	Ambient	P.ficiformis	No	Yes	PetrosiaVC	PF5	Bacteria	Bacteroidota	Bacteroidia	Chitinophagales	Order: Chitinophagales	Order: Chitinophagales	Order: Chitinophagales
15ccefdc889503eb7771e1ddf381a896	15	VcPf2N	Unhealthy	Grotta_Vico	VC	White_Cave_Dweller	Cave	Ambient	P.ficiformis	No	Yes	PetrosiaVC	PF5	Bacteria	Bdellovibrionota	Bdellovibrionia	Bdellovibrionales	Bdellovibrionaceae	Bdellovibrio	Genus: Bdellovibrio
f7d1e1537ec2e8cd6fcd0c73583d9e5c	15	VcPf2N	Unhealthy	Grotta_Vico	VC	White_Cave_Dweller	Cave	Ambient	P.ficiformis	No	Yes	PetrosiaVC	PF5	Bacteria	Desulfobacterota	Desulfuromonadia	PB19	PB19	PB19	Genus: PB19
13ac0ffd32fa5db978d64371e0453933	15	VcPf2N	Unhealthy	Grotta_Vico	VC	White_Cave_Dweller	Cave	Ambient	P.ficiformis	No	Yes	PetrosiaVC	PF5	Bacteria	Hydrogenedentes	Hydrogenedentia	Hydrogenedentiales	Hydrogenedensaceae	Hydrogenedensaceae	Genus: Hydrogenedensaceae
59e95505dba1d681397ff4ec9c8ce5e2	15	VcPf2N	Unhealthy	Grotta_Vico	VC	White_Cave_Dweller	Cave	Ambient	P.ficiformis	No	Yes	PetrosiaVC	PF5	Bacteria	Kingdom: Bacteria	Kingdom: Bacteria	Kingdom: Bacteria	Kingdom: Bacteria	Kingdom: Bacteria	Kingdom: Bacteria
f726814575ed2963d588b4ded1db6cc2	15	VcPf2N	Unhealthy	Grotta_Vico	VC	White_Cave_Dweller	Cave	Ambient	P.ficiformis	No	Yes	PetrosiaVC	PF5	Bacteria	Myxococcota	Polyangia	Haliangiales	Haliangiaceae	Haliangium	Genus: Haliangium
14ffff1b4a64bfa25ef3194d0a9092cc	15	VcPf2N	Unhealthy	Grotta_Vico	VC	White_Cave_Dweller	Cave	Ambient	P.ficiformis	No	Yes	PetrosiaVC	PF5	Bacteria	Proteobacteria	Alphaproteobacteria	Micavibrionales	Micavibrionaceae	Family: Micavibrionaceae	Family: Micavibrionaceae
ad202ef034bc5dbf29196f88e236c724	15	VcPf2N	Unhealthy	Grotta_Vico	VC	White_Cave_Dweller	Cave	Ambient	P.ficiformis	No	Yes	PetrosiaVC	PF5	Bacteria	Proteobacteria	Gammaproteobacteria	Pseudomonadales	Nitrincolaceae	Family: Nitrincolaceae	Family: Nitrincolaceae
e805657d8518a62ac1a4430c7bac2c13	15	VcPf2N	Unhealthy	Grotta_Vico	VC	White_Cave_Dweller	Cave	Ambient	P.ficiformis	No	Yes	PetrosiaVC	PF5	Bacteria	Proteobacteria	Alphaproteobacteria	Rhodobacterales	Rhodobacteraceae	Family: Rhodobacteraceae	Family: Rhodobacteraceae
f09d2e538ac84a51b40c5640cdd42eda	15	VcPf2N	Unhealthy	Grotta_Vico	VC	White_Cave_Dweller	Cave	Ambient	P.ficiformis	No	Yes	PetrosiaVC	PF5	Bacteria	Proteobacteria	Alphaproteobacteria	Sphingomonadales	Sphingomonadaceae	Family: Sphingomonadaceae	Family: Sphingomonadaceae
475630406f837012c74e0232c77fc91a	15	VcPf2N	Unhealthy	Grotta_Vico	VC	White_Cave_Dweller	Cave	Ambient	P.ficiformis	No	Yes	PetrosiaVC	PF5	Bacteria	Verrucomicrobiota	Verrucomicrobiae	Verrucomicrobiales	DEV007	DEV007	Genus: DEV007
bcf2396eadeb61955649d5e3b17dedc9	15	VcPf2N	Unhealthy	Grotta_Vico	VC	White_Cave_Dweller	Cave	Ambient	P.ficiformis	No	Yes	PetrosiaVC	PF5	Bacteria	Verrucomicrobiota	Chlamydiae	Chlamydiales	Criblamydiaceae	Criblamydiaceae	Genus: Criblamydiaceae
0551832d82bf80d870af0ef59b950802	14	VcPf2N	Unhealthy	Grotta_Vico	VC	White_Cave_Dweller	Cave	Ambient	P.ficiformis	No	Yes	PetrosiaVC	PF5	Bacteria	Bacteroidota	Bacteroidia	Flavobacteriales	Flavobacteriaceae	Aquibacter	Genus: Aquibacter
c92c60ca13bfee20ce6e9e48a9986a99	14	VcPf2N	Unhealthy	Grotta_Vico	VC	White_Cave_Dweller	Cave	Ambient	P.ficiformis	No	Yes	PetrosiaVC	PF5	Bacteria	Bacteroidota	Bacteroidia	Bacteroidales	Order: Bacteroidales	Order: Bacteroidales	Order: Bacteroidales
bcebcf5219368ffe87c7afc4226c507d	14	VcPf2N	Unhealthy	Grotta_Vico	VC	White_Cave_Dweller	Cave	Ambient	P.ficiformis	No	Yes	PetrosiaVC	PF5	Bacteria	Dependentiae	Babeliae	Babeliales	Babeliaceae	Babeliaceae	Genus: Babeliaceae
ee60dd5e9eb1598f3e3499cacfa4fbe1	14	VcPf2N	Unhealthy	Grotta_Vico	VC	White_Cave_Dweller	Cave	Ambient	P.ficiformis	No	Yes	PetrosiaVC	PF5	Bacteria	Planctomycetota	Planctomycetes	Planctomycetales	Gimesiaceae	Gimesia	Genus: Gimesia
cf087dfd0b929370cee50d8c844aaade	14	VcPf2N	Unhealthy	Grotta_Vico	VC	White_Cave_Dweller	Cave	Ambient	P.ficiformis	No	Yes	PetrosiaVC	PF5	Bacteria	Proteobacteria	Alphaproteobacteria	Parvibaculales	PS1_clade	PS1_clade	Genus: PS1_clade
145e57b9b85982385e46aba9d6c72e1a	13	VcPf2N	Unhealthy	Grotta_Vico	VC	White_Cave_Dweller	Cave	Ambient	P.ficiformis	No	Yes	PetrosiaVC	PF5	Bacteria	Bacteroidota	Bacteroidia	Flavobacteriales	Cryomorphaceae	Family: Cryomorphaceae	Family: Cryomorphaceae
70599417a4e99b2a7a1c49996b8eccec	13	VcPf2N	Unhealthy	Grotta_Vico	VC	White_Cave_Dweller	Cave	Ambient	P.ficiformis	No	Yes	PetrosiaVC	PF5	Bacteria	Bacteroidota	Bacteroidia	Bacteroidales	Prolixibacteraceae	Roseimarinus	Prolixibacteraceae_bacterium
be99b05b35d0d544fa2d9e829fe64894	13	VcPf2N	Unhealthy	Grotta_Vico	VC	White_Cave_Dweller	Cave	Ambient	P.ficiformis	No	Yes	PetrosiaVC	PF5	Bacteria	Bacteroidota	Bacteroidia	Flavobacteriales	Flavobacteriaceae	Flagellimonas	Genus: Flagellimonas
89a07443e5c973ef700fba5a47b9bf8a	13	VcPf2N	Unhealthy	Grotta_Vico	VC	White_Cave_Dweller	Cave	Ambient	P.ficiformis	No	Yes	PetrosiaVC	PF5	Bacteria	Bdellovibrionota	Oligoflexia	Oligoflexales	Oligoflexaceae	Family: Oligoflexaceae	Family: Oligoflexaceae
bad8f7c60e6fbfb3cad5fefb413bda47	13	VcPf2N	Unhealthy	Grotta_Vico	VC	White_Cave_Dweller	Cave	Ambient	P.ficiformis	No	Yes	PetrosiaVC	PF5	Bacteria	Desulfobacterota	Desulfuromonadia	Bradymonadales	Bradymonadales	Bradymonadales	Genus: Bradymonadales
e888fafc09a13d0b519ba3b17d7e8996	13	VcPf2N	Unhealthy	Grotta_Vico	VC	White_Cave_Dweller	Cave	Ambient	P.ficiformis	No	Yes	PetrosiaVC	PF5	Bacteria	Firmicutes	Clostridia	Peptococcales	Peptococcaceae	Family: Peptococcaceae	Family: Peptococcaceae
717311c7391c0f2eab22e578b3b1f594	13	VcPf2N	Unhealthy	Grotta_Vico	VC	White_Cave_Dweller	Cave	Ambient	P.ficiformis	No	Yes	PetrosiaVC	PF5	Bacteria	Kingdom: Bacteria	Kingdom: Bacteria	Kingdom: Bacteria	Kingdom: Bacteria	Kingdom: Bacteria	Kingdom: Bacteria
704130b6de4398dfa9d8e388b121d363	13	VcPf2N	Unhealthy	Grotta_Vico	VC	White_Cave_Dweller	Cave	Ambient	P.ficiformis	No	Yes	PetrosiaVC	PF5	Bacteria	Planctomycetota	Planctomycetes	Pirellulales	Pirellulaceae	Rhodopirellula	Genus: Rhodopirellula
c65e464bfe621902967b9fd6f9a00dcd	13	VcPf2N	Unhealthy	Grotta_Vico	VC	White_Cave_Dweller	Cave	Ambient	P.ficiformis	No	Yes	PetrosiaVC	PF5	Bacteria	Planctomycetota	Planctomycetes	Pirellulales	Pirellulaceae	Rhodopirellula	Genus: Rhodopirellula
f53c36c9883ec97b0fcebe727df8b8cb	13	VcPf2N	Unhealthy	Grotta_Vico	VC	White_Cave_Dweller	Cave	Ambient	P.ficiformis	No	Yes	PetrosiaVC	PF5	Bacteria	Planctomycetota	Planctomycetes	Pirellulales	Pirellulaceae	Family: Pirellulaceae	Family: Pirellulaceae
37138a65bd619e5b624eb08a7fda37ed	13	VcPf2N	Unhealthy	Grotta_Vico	VC	White_Cave_Dweller	Cave	Ambient	P.ficiformis	No	Yes	PetrosiaVC	PF5	Bacteria	Proteobacteria	Alphaproteobacteria	Micavibrionales	Micavibrionaceae	Family: Micavibrionaceae	Family: Micavibrionaceae
3bb37fa4dd693442cf867b072e49e9c8	13	VcPf2N	Unhealthy	Grotta_Vico	VC	White_Cave_Dweller	Cave	Ambient	P.ficiformis	No	Yes	PetrosiaVC	PF5	Bacteria	Proteobacteria	Alphaproteobacteria	Class: Alphaproteobacteria	Class: Alphaproteobacteria	Class: Alphaproteobacteria	Class: Alphaproteobacteria
ff434d11189f78b7eb71cca39d611a49	13	VcPf2N	Unhealthy	Grotta_Vico	VC	White_Cave_Dweller	Cave	Ambient	P.ficiformis	No	Yes	PetrosiaVC	PF5	Bacteria	Proteobacteria	Alphaproteobacteria	Micavibrionales	Order: Micavibrionales	Order: Micavibrionales	Order: Micavibrionales
63c1e13003a0d33a445f2a79b4068a5f	13	VcPf2N	Unhealthy	Grotta_Vico	VC	White_Cave_Dweller	Cave	Ambient	P.ficiformis	No	Yes	PetrosiaVC	PF5	Bacteria	Verrucomicrobiota	Kiritimatiellae	WCHB1-41	WCHB1-41	WCHB1-41	Genus: WCHB1-41
daa91ad840e0253ce73443a2ebbe4ad3	12	VcPf2N	Unhealthy	Grotta_Vico	VC	White_Cave_Dweller	Cave	Ambient	P.ficiformis	No	Yes	PetrosiaVC	PF5	Bacteria	Actinobacteriota	Acidimicrobiia	Microtrichales	Ilumatobacteraceae	Ilumatobacter	Genus: Ilumatobacter
dfd920972148bfdfdb222a0baaf8859b	12	VcPf2N	Unhealthy	Grotta_Vico	VC	White_Cave_Dweller	Cave	Ambient	P.ficiformis	No	Yes	PetrosiaVC	PF5	Bacteria	Bdellovibrionota	Bdellovibrionia	Bdellovibrionales	Bdellovibrionaceae	Bdellovibrio	Genus: Bdellovibrio
b6ba2bf8a4469c06119df6a1740014ee	12	VcPf2N	Unhealthy	Grotta_Vico	VC	White_Cave_Dweller	Cave	Ambient	P.ficiformis	No	Yes	PetrosiaVC	PF5	Bacteria	Calditrichota	Calditrichia	Calditrichales	Calditrichaceae	Calditrichaceae	Genus: Calditrichaceae
6e2fb90406066f8c748a2b0c84bf66eb	12	VcPf2N	Unhealthy	Grotta_Vico	VC	White_Cave_Dweller	Cave	Ambient	P.ficiformis	No	Yes	PetrosiaVC	PF5	Bacteria	Chloroflexi	Anaerolineae	SBR1031	SBR1031	SBR1031	Genus: SBR1031
305ded74c1fd06af7eb7ef02a5a25695	12	VcPf2N	Unhealthy	Grotta_Vico	VC	White_Cave_Dweller	Cave	Ambient	P.ficiformis	No	Yes	PetrosiaVC	PF5	Bacteria	Desulfobacterota	Desulfuromonadia	PB19	PB19	PB19	Genus: PB19
75c9e1c9aba46b2fe8856b38312b59c2	12	VcPf2N	Unhealthy	Grotta_Vico	VC	White_Cave_Dweller	Cave	Ambient	P.ficiformis	No	Yes	PetrosiaVC	PF5	Bacteria	Firmicutes	Bacilli	Izemoplasmatales	Izemoplasmataceae	Izimaplasma	Genus: Izimaplasma
8c9621571b7030d72aef7e36aa5eaa66	12	VcPf2N	Unhealthy	Grotta_Vico	VC	White_Cave_Dweller	Cave	Ambient	P.ficiformis	No	Yes	PetrosiaVC	PF5	Bacteria	Firmicutes	Bacilli	RF39	RF39	RF39	Genus: RF39
fab7c6254f8fa4428f3b805e1f33da5f	12	VcPf2N	Unhealthy	Grotta_Vico	VC	White_Cave_Dweller	Cave	Ambient	P.ficiformis	No	Yes	PetrosiaVC	PF5	Archaea	Nanoarchaeota	Nanoarchaeia	Woesearchaeales	SCGC_AAA011-D5	SCGC_AAA011-D5	Genus: SCGC_AAA011-D5
311680f711cb60bcd75b7abc680ea48a	12	VcPf2N	Unhealthy	Grotta_Vico	VC	White_Cave_Dweller	Cave	Ambient	P.ficiformis	No	Yes	PetrosiaVC	PF5	Bacteria	Planctomycetota	Planctomycetes	Pirellulales	Pirellulaceae	Pir4_lineage	Genus: Pir4_lineage
36b854caf98ea833315fe4f0c850b7ab	12	VcPf2N	Unhealthy	Grotta_Vico	VC	White_Cave_Dweller	Cave	Ambient	P.ficiformis	No	Yes	PetrosiaVC	PF5	Bacteria	Planctomycetota	Planctomycetes	Pirellulales	Pirellulaceae	Blastopirellula	Genus: Blastopirellula
9f9203bcdc74bb3036a09b14598cacf5	12	VcPf2N	Unhealthy	Grotta_Vico	VC	White_Cave_Dweller	Cave	Ambient	P.ficiformis	No	Yes	PetrosiaVC	PF5	Bacteria	Planctomycetota	Phycisphaerae	Phycisphaerales	Phycisphaeraceae	Urania-1B-19_sediment	Genus: Urania-1B-19_sediment
e30d9341f2c5beb7187f33f16847ed64	12	VcPf2N	Unhealthy	Grotta_Vico	VC	White_Cave_Dweller	Cave	Ambient	P.ficiformis	No	Yes	PetrosiaVC	PF5	Bacteria	Planctomycetota	Planctomycetes	Planctomycetales	Order: Planctomycetales	Order: Planctomycetales	Order: Planctomycetales
93851247298e97ceb9e9ee6a5ea5b11d	12	VcPf2N	Unhealthy	Grotta_Vico	VC	White_Cave_Dweller	Cave	Ambient	P.ficiformis	No	Yes	PetrosiaVC	PF5	Bacteria	Proteobacteria	Gammaproteobacteria	Pseudomonadales	Cellvibrionaceae	Family: Cellvibrionaceae	Family: Cellvibrionaceae
99689d56f41af1720a0f4d60c43bebba	12	VcPf2N	Unhealthy	Grotta_Vico	VC	White_Cave_Dweller	Cave	Ambient	P.ficiformis	No	Yes	PetrosiaVC	PF5	Bacteria	Proteobacteria	Gammaproteobacteria	Ga0077536	Ga0077536	Ga0077536	Genus: Ga0077536
45ba98d476023fb75c99d8ab097e57a7	11	VcPf2N	Unhealthy	Grotta_Vico	VC	White_Cave_Dweller	Cave	Ambient	P.ficiformis	No	Yes	PetrosiaVC	PF5	Bacteria	Bacteroidota	Rhodothermia	Rhodothermales	Rhodothermaceae	Family: Rhodothermaceae	Family: Rhodothermaceae
54a585c57c9c384e41968c1f45460b99	11	VcPf2N	Unhealthy	Grotta_Vico	VC	White_Cave_Dweller	Cave	Ambient	P.ficiformis	No	Yes	PetrosiaVC	PF5	Bacteria	Bacteroidota	Bacteroidia	Sphingobacteriales	NS11-12_group	NS11-12_group	Genus: NS11-12_group
cba814ee2db31cedc8025c60fb153dea	11	VcPf2N	Unhealthy	Grotta_Vico	VC	White_Cave_Dweller	Cave	Ambient	P.ficiformis	No	Yes	PetrosiaVC	PF5	Bacteria	Bacteroidota	Bacteroidia	Flavobacteriales	Flavobacteriaceae	Lutibacter	Genus: Lutibacter
343895b4e4cb35f6d503935320b832dc	11	VcPf2N	Unhealthy	Grotta_Vico	VC	White_Cave_Dweller	Cave	Ambient	P.ficiformis	No	Yes	PetrosiaVC	PF5	Bacteria	Bdellovibrionota	Oligoflexia	Oligoflexales	Oligoflexaceae	Family: Oligoflexaceae	Family: Oligoflexaceae
3e6c9e7a763e89b7818b6a215213a3f5	11	VcPf2N	Unhealthy	Grotta_Vico	VC	White_Cave_Dweller	Cave	Ambient	P.ficiformis	No	Yes	PetrosiaVC	PF5	Bacteria	Bdellovibrionota	Bdellovibrionia	Bacteriovoracales	Bacteriovoracaceae	Family: Bacteriovoracaceae	Family: Bacteriovoracaceae
f2006d9f5c66b195e1f9a4877e4dbe71	11	VcPf2N	Unhealthy	Grotta_Vico	VC	White_Cave_Dweller	Cave	Ambient	P.ficiformis	No	Yes	PetrosiaVC	PF5	Bacteria	Bdellovibrionota	Bdellovibrionia	Bacteriovoracales	Bacteriovoracaceae	Family: Bacteriovoracaceae	Family: Bacteriovoracaceae
[truncated: 9,747 more rows]
[truncated: 2 more columns]

## Sheet: S6
Table S6. Shared ASVs across Healthy and Unhealthy sponges, reporting their relative abundance contribution within each sample and their taxonomy.
[truncated: 49 more rows]

## Sheet: S7
Table S7. Statistical output tables for alpha and beta diversity analyses, beta dispersion and dysbiosis Indexes.
[truncated: 30 more rows]

[truncated: 11 more sheets: S8, S9, S10, S11, S12, S13, S14, S15, S16, S17, S18]
